# Supplementary material for: Identification of a transcriptome profile associated with improvement of organ function in septic shock patients after early supportive therapy
Source: Crit Care. 2018 Nov 21;22:312. doi: 10.1186/s13054-018-2242-3 (PMC6249814; doi:10.1186/s13054-018-2242-3)
Supplement: Supplementary file 3 — Table S7. Globin depletion (Mann–Whitney test). This table summarizes the percentage of reads mapping unambiguously to the reference genome (GRCh38) regarding all genes encoding for globins. For each gene, the following information is reported: mean percentage in responders (Rs) and non-responders (NRs), standard deviation in Rs and NRs, and P value (Mann–Whitney test) of the comparison test between Rs and NRs. (XLSX 17 kb) [file 13054_2018_2242_MOESM3_ESM.xlsx]

## Sheet: Foglio1
Table S7: Globin depletion (Mann Whitney test)
Gene	mean % NR	mean % R	sd NR	sd R	pval
HBA1	0.00172627	0.00175368	0.00335993	0.00415927	0.944861
HBA2	0.0484681	0.0410505	0.133614	0.110886	0.608796
HBB	0.0373945	0.0590317	0.0944264	0.178629	0.268476
HBBP1	1.30207e-05	2.60031e-06	3.89327e-05	4.93517e-06	0.107931
HBD	0.000652861	0.000142034	0.00249777	0.000190896	0.228819
HBE1	5.9439e-06	4.20589e-06	1.05933e-05	9.19869e-06	0.268214
HBEGF	0.000211454	0.000133944	0.000357284	0.000175922	0.455099
HBG1	0.000141367	2.8171e-05	0.000397463	7.52478e-05	0.351602
HBG2	0.00129405	0.00105808	0.00324532	0.00272875	0.497906
HBM	0.00522308	0.0043485	0.00816494	0.00341701	0.515617
HBP1	0.026804	0.0254529	0.0055084	0.00693348	0.228819
HBQ1	0.00144381	0.00141187	0.00147404	0.00105867	0.618512
HBS1L	0.00726653	0.00648516	0.00250228	0.00146209	0.43044
HBZ	3.09789e-05	2.36327e-05	5.84699e-05	3.85921e-05	0.983176
Legend: This table summarize the percentage of reads mapping unambiguosly to the reference genome (GRCh38) regarding all genes encoding for globins. For each gene is reported: mean % in R and NR, sd in R and NR and pvalue (Mann Whitney test) of the comparison test between R and NR.
