# Supplementary material for: Identification of a transcriptome profile associated with improvement of organ function in septic shock patients after early supportive therapy
Source: Crit Care. 2018 Nov 21;22:312. doi: 10.1186/s13054-018-2242-3 (PMC6249814; doi:10.1186/s13054-018-2242-3)
Supplement: Supplementary file 5 — Table S3. Differentially expressed gene (DEG) T2vsT1 in non-responder (NR) patients. This table describes the results of the differential expression analysis between T1 and T2 in NRs. In total, 1914 DEGs were identified with a padj < 0.01. For each gene, the following information is reported: Ensembl Gene Name, the mean level of expression in all samples (baseMean), log2FoldChange comparing T2 versus T1, level of statistical significance (padj), genomic coordinates (chromosome_name, start_position, end_position), description of gene function (description), official gene symbol (external_gene_name), type of gene (gene_biotype), and the normalized gene count values in each biological sample. Abbreviations: T1 time point 1, T2 time point 2. (XLSX 2409 kb) [file 13054_2018_2242_MOESM5_ESM.xlsx]

## Sheet: T2vsT1_NonResponders
Table S3: DEGs T2vsT1 in NR patients.
GeneID	baseMean	log2FoldChange	padj	chromosome_name	start_position	end_position	description	external_gene_name	gene_biotype	E07T1	E07T2	E15T1	E15T2	E16T1	E16T2	E17T1	E17T2	E26T1	E26T2	E33T1	E33T2	E40T1	E40T2	E41T1	E41T2	G01T1	G01T2	G08T1	G08T2	G12T1	G12T2	G35T1	G35T2	G42T1	G42T2	G47T1	G47T2
ENSG00000152766	841.026	-1.9526	1.51444e-40	10	88822132	88851818	ankyrin repeat domain 22 [Source:HGNC Symbol;Acc:HGNC:28321]	ANKRD22	protein_coding	971.138	130.346	1431.01	398.126	1379.88	291.131	408.984	171.251	195.82	46.8549	1944.89	329.179	2803	346.644	1207.03	401.958	1065.77	142.944	1371.42	479.646	3056.34	1067.42	471.134	113.479	593.208	208.516	2045.27	476.338
ENSG00000188313	3411.38	-1.35876	1.04586e-27	3	146515180	146544864	phospholipid scramblase 1 [Source:HGNC Symbol;Acc:HGNC:9092]	PLSCR1	protein_coding	4113.53	1097.5	5064.02	2665.56	9241.12	1957.68	1537.21	975.79	2251.13	959.106	4650.22	2334.5	6268.9	2034.86	4490.19	1990.71	7664.85	1867.8	5391.11	2221.52	7535.39	2172.92	3166.46	1403.78	2574.8	1063.57	6424.42	2400.07
ENSG00000151726	58208.1	-0.981618	2.65075e-25	4	184755595	184826818	acyl-CoA synthetase long-chain family member 1 [Source:HGNC Symbol;Acc:HGNC:3569]	ACSL1	protein_coding	72571.4	35999.9	77514.9	41590.3	130602	46921	25684.6	19286	28689.2	12599.7	87779.8	35474.5	106268	49151.6	89532.6	48559.4	125816	51010.5	68559.8	45360.8	86483.1	49378.1	64175.6	29011.9	50293.4	31802.2	83734.6	35974.9
ENSG00000178896	404.931	-1.51442	2.65075e-25	8	144078626	144080647	exosome component 4 [Source:HGNC Symbol;Acc:HGNC:18189]	EXOSC4	protein_coding	469.329	112.342	755.357	187.829	899.646	228.644	263.616	249.246	229.527	47.5648	795.097	318.812	952.975	228.862	532.805	150.287	468.359	140.221	709.357	340.801	731.166	266.597	405.394	132.393	342.768	141.343	939.118	298.616
ENSG00000249173	52.3996	-2.59553	2.65075e-25	4	184893871	184899454	long intergenic non-protein coding RNA 1093 [Source:HGNC Symbol;Acc:HGNC:49218]	LINC01093	lincRNA	16.2398	3.60071	290.522	20.6702	373.28	15.6216	5.42419	1.69555	3.21016	2.83969	213.363	21.5997	30.2901	6.70306	46.8671	3.57826	205.904	10.891	3.78324	0	47.1029	6.17599	4.10873	1.05074	48.4722	4.19831	73.3106	6.68544
ENSG00000153208	344.749	-1.48843	2.7468e-22	2	111898479	112029561	MER proto-oncogene, tyrosine kinase [Source:HGNC Symbol;Acc:HGNC:7027]	MERTK	protein_coding	254.964	72.7344	680.864	159.97	833.239	315.273	148.623	112.754	344.29	88.7404	1228.21	719.702	724.634	154.17	448.115	197.997	430.659	98.0186	382.107	147.861	786.833	217.189	104.088	51.4861	291.987	104.958	464.919	88.5821
ENSG00000184557	3477.64	-1.41268	1.70171e-19	17	78356778	78360077	suppressor of cytokine signaling 3 [Source:HGNC Symbol;Acc:HGNC:19391]	SOCS3	protein_coding	2482.25	771.273	3457.95	1103.61	5837.56	1846.19	2784.78	686.698	2630.73	1076.95	7847.93	3766.12	8071.16	2905.3	8845.54	1657.93	8160.76	1306.91	4203.18	1696.79	6674.7	2393.2	1555.84	1464.73	3480.77	1609.35	6221.19	2834.63
ENSG00000131370	1626.88	-1.12551	2.20481e-19	3	15254853	15341368	SH3 domain binding protein 5 [Source:HGNC Symbol;Acc:HGNC:10827]	SH3BP5	protein_coding	1857.02	716.542	3259.06	1248.3	2912.14	1116.95	900.415	834.211	1044.91	518.954	3266.1	1581.96	3849.18	1025.57	2012.82	1366.9	2501.3	951.597	2020.25	1080.1	2633.48	1096.24	1429.84	532.723	1760	884.444	2347.79	803.924
ENSG00000079215	402.818	-1.71951	9.12154e-19	5	36606355	36688334	solute carrier family 1 member 3 [Source:HGNC Symbol;Acc:HGNC:10941]	SLC1A3	protein_coding	421.422	259.251	511.02	163.564	1270.83	220.123	77.0235	27.1288	252.8	66.0228	1250.09	217.725	1549.46	232.692	240.913	166.986	1932.89	179.701	329.142	77.5367	785.762	135.872	116.414	59.8919	118.872	50.3797	427.8	137.609
ENSG00000168916	161.495	2.16352	9.24858e-18	5	124636913	124748807	zinc finger protein 608 [Source:HGNC Symbol;Acc:HGNC:29238]	ZNF608	protein_coding	32.4795	582.595	22.3478	197.715	20.2717	97.9903	78.1083	72.0609	15.2483	110.038	10.9417	193.533	22.1351	466.341	66.6006	193.226	94.2519	517.32	54.8569	272.28	5.3526	168.81	205.436	546.383	42.7017	208.516	23.1995	201.12
ENSG00000170525	4458.66	-1.42828	9.24858e-18	10	6144934	6235545	6-phosphofructo-2-kinase/fructose-2,6-biphosphatase 3 [Source:HGNC Symbol;Acc:HGNC:8874]	PFKFB3	protein_coding	5572.67	2252.61	5583.98	2426.5	9957.62	2067.74	1722.72	1292.86	2801.67	841.969	7973.76	7238.49	10940.6	2275.21	7701	2093.28	14588.7	2882.02	7645.92	1978.09	6137.29	1801.33	3419.83	964.576	3981.65	1581.36	4670.53	2448.54
ENSG00000177112	188.319	-1.70106	9.24858e-18	11	10541272	10599932	MRVI1 antisense RNA 1 [Source:HGNC Symbol;Acc:HGNC:43434]	MRVI1-AS1	antisense	90.1307	22.3244	2964.07	178.842	93.6694	38.344	33.63	14.4122	45.7448	14.1985	533.408	129.598	58.2503	14.3637	61.6672	29.8189	131.953	36.757	71.8815	25.2445	154.155	87.4932	57.5222	14.7103	128.105	26.5893	175.389	40.6698
ENSG00000067064	5167.71	-1.33827	1.31237e-17	10	1039908	1049170	isopentenyl-diphosphate delta isomerase 1 [Source:HGNC Symbol;Acc:HGNC:5387]	IDI1	protein_coding	7523.07	1404.28	8994.26	3386.32	10772.7	3475.1	1929.93	1740.48	2643.57	845.518	8399.58	2378.56	10551.5	4316.77	10204.7	5545.11	12158.5	3018.16	6592.29	4527.78	12094.7	2761.7	4544.25	1862.95	3088.37	1511.39	6341.83	2082.51
ENSG00000120306	4674.14	-1.67333	1.67301e-17	5	140174642	140282052	cysteine rich transmembrane module containing 1 [Source:HGNC Symbol;Acc:HGNC:30239]	CYSTM1	protein_coding	5575.92	1103.26	10437.2	2512.78	13615.6	2300.64	1727.06	2008.38	3755.09	576.457	6687.2	3317.71	11122.3	2136.36	8356.32	3203.74	11968.5	1336.87	6439.07	3415.22	7847.99	1471.94	4720.93	1210.45	2714.44	1080.37	8022.4	2211.77
ENSG00000167642	536.421	-1.21791	3.25421e-17	19	38244035	38292614	serine peptidase inhibitor, Kunitz type 2 [Source:HGNC Symbol;Acc:HGNC:11247]	SPINT2	protein_coding	527.792	204.521	1208.27	355.887	984.927	264.858	448.038	320.459	1174.92	415.305	847.982	321.404	1194.13	286.316	414.404	158.636	626.413	175.617	461.555	198.35	687.274	285.125	486.199	370.91	832.106	509.395	774.865	484.137
ENSG00000198018	999.049	-1.85063	4.03559e-17	10	99659506	99706240	ectonucleoside triphosphate diphosphohydrolase 7 [Source:HGNC Symbol;Acc:HGNC:19745]	ENTPD7	protein_coding	1464.83	109.462	1083.87	481.706	2633.93	724.276	376.439	245.855	963.049	178.191	1540.96	1401.39	2261.28	316.001	1423.28	425.813	3329.27	242.324	1912.43	430.96	2211.7	320.122	1265.49	158.661	687.844	159.536	1264.84	359.9
ENSG00000102401	470.032	-0.811371	1.0779e-16	X	101622797	101627843	armadillo repeat containing, X-linked 3 [Source:HGNC Symbol;Acc:HGNC:24065]	ARMCX3	protein_coding	573.263	391.758	714.386	362.178	785.006	411.843	400.305	295.874	475.104	218.656	669.267	347.323	535.903	337.068	508.96	349.477	646.713	356.679	450.205	283.099	777.198	466.287	577.961	321.525	542.427	331.667	773.937	256.832
ENSG00000072952	1400.71	-1.06188	1.12454e-16	11	10573091	10693988	murine retrovirus integration site 1 homolog [Source:HGNC Symbol;Acc:HGNC:7237]	MRVI1	protein_coding	1275.63	496.898	2502.96	1206.06	1718.21	1006.89	517.468	546.815	872.362	352.122	1906.59	1203.54	4346.64	1578.09	2950.16	1628.11	2595.55	895.781	1710.02	852.904	1141.18	536.282	1435.32	450.766	2138.55	990.802	1778.01	586.09
ENSG00000058063	12324.1	-0.804831	9.68178e-16	3	182793500	182921635	ATPase phospholipid transporting 11B (putative) [Source:HGNC Symbol;Acc:HGNC:13553]	ATP11B	protein_coding	21885.5	9945.17	14529.1	8228.54	16750.8	9635	5210.48	4839.95	7224.47	3173.36	15428.7	9280.96	19765.5	10441.5	19636.5	13101.2	23513.7	10074.1	15155.6	10642.4	19831.4	11512	15143.4	7467.58	8936.2	6289.07	19019.9	8413.63
ENSG00000139572	575.093	-2.10049	1.33955e-15	12	54362445	54364487	G protein-coupled receptor 84 [Source:HGNC Symbol;Acc:HGNC:4535]	GPR84	protein_coding	565.956	40.328	606.371	159.071	1289.7	159.767	184.422	220.422	370.774	33.3664	1080.49	460.506	2182.06	86.1822	967.764	125.239	1361.58	106.187	1781.9	277.69	1585.44	201.749	468.395	96.6677	565.509	78.3685	824.976	221.734
ENSG00000140379	6277.63	-1.00101	1.66517e-15	15	79960889	79971446	BCL2 related protein A1 [Source:HGNC Symbol;Acc:HGNC:991]	BCL2A1	protein_coding	7018.82	2177.71	9240.08	4336.25	15278.6	6173.39	3614.68	1793.89	3496.67	1093.28	9133.58	3938.06	9125.49	6127.55	9907.04	4687.52	12497.8	5103.78	7012.23	6177.69	8074.94	5305.17	6569.85	3611.38	5705.87	3896.03	10755.3	3921.01
ENSG00000159496	2582.67	-1.24205	2.3792e-15	22	23688136	23699176	ral guanine nucleotide dissociation stimulator like 4 [Source:HGNC Symbol;Acc:HGNC:31911]	RGL4	protein_coding	4744.45	915.301	3926.51	1756.97	3742.58	1601.22	1582.78	1282.68	1364.32	455.77	3472.17	1880.9	6463.45	1557.98	3226.43	1692.52	4397.94	770.535	4369.64	2470.36	5599.89	2123.51	3047.31	1431.1	2445.54	1109.75	3337.02	1546.01
ENSG00000116977	1822.99	-0.66194	2.95076e-15	1	236518000	236552981	galectin 8 [Source:HGNC Symbol;Acc:HGNC:6569]	LGALS8	protein_coding	2430.28	1368.99	2393.45	1651.82	2201.23	1544.41	1230.21	947.813	1469.45	932.839	2349.73	1156.88	2327.68	1489.99	2735.56	1625.72	3610.57	1690.82	2084.56	1738.26	2919.31	1607.82	1564.06	1154.76	2051.99	1389.64	2174.26	1201.71
ENSG00000196636	315.126	-1.31103	3.85898e-15	7	97116590	97181763	succinate dehydrogenase complex assembly factor 3 [Source:HGNC Symbol;Acc:HGNC:21752]	SDHAF3	protein_coding	457.961	193.718	536.348	143.793	661.977	205.922	116.078	110.211	199.833	53.9541	441.315	83.8068	647.743	249.928	429.204	197.997	943.969	258.66	419.939	355.226	609.126	160.576	332.807	185.98	215.817	90.9634	403.672	116.995
ENSG00000102543	333.919	-1.17241	5.56858e-15	13	49247925	49293485	cytidine and dCMP deaminase domain containing 1 [Source:HGNC Symbol;Acc:HGNC:20299]	CDADC1	protein_coding	496.125	146.189	333.728	187.829	672.463	238.585	174.659	171.251	239.157	78.8014	544.349	254.876	644.248	148.425	717.806	338.742	508.96	181.062	550.461	382.274	692.627	236.746	364.307	105.074	222.741	132.947	406.456	178.836
ENSG00000196083	4815.8	-1.50783	6.03123e-15	3	190514051	190659750	interleukin 1 receptor accessory protein [Source:HGNC Symbol;Acc:HGNC:5995]	IL1RAP	protein_coding	4198.79	937.626	20748.5	3001.68	11635.3	2686.92	1177.05	709.588	745.56	568.648	18487.8	3271.06	8306.49	2752.08	5513.05	2205.4	11452.3	2726.82	4861.46	3568.49	6270.04	1097.27	1759.9	945.662	2603.65	1581.36	9176.81	1852.98
ENSG00000229647	34.4605	-1.70662	1.22678e-14	2	207239650	207245887		AC007879.7	lincRNA	40.5994	5.76114	39.4812	19.7715	45.4367	13.4914	24.9513	17.8033	47.3499	9.93892	68.3856	31.9676	115.336	9.5758	47.6893	11.9275	49.301	5.44548	60.5318	23.4413	119.898	29.8506	49.3047	8.40589	20.7738	5.59775	36.1913	6.68544
ENSG00000069869	770.44	-1.16855	1.26621e-14	15	55826922	55993746	neural precursor cell expressed, developmentally down-regulated 4, E3 ubiquitin protein ligase [Source:HGNC Symbol;Acc:HGNC:7727]	NEDD4	protein_coding	929.726	225.405	1270.85	602.132	1420.42	467.229	307.009	225.508	683.765	292.488	1299.33	620.343	2055.07	586.039	827.985	518.848	1821.24	333.536	1029.04	616.687	1601.5	553.78	561.526	319.424	409.706	242.103	1168.33	583.305
ENSG00000172965	450.593	-0.743331	1.49226e-14	2	111196350	111495100	MIR4435-2 host gene [Source:HGNC Symbol;Acc:HGNC:35163]	MIR4435-2HG	lincRNA	547.28	293.818	895.403	399.025	520.075	362.138	337.385	261.115	220.699	118.557	840.687	391.387	385.617	248.971	474.426	306.538	1015.02	466.95	427.506	299.328	745.082	460.111	443.743	371.961	676.303	379.248	476.983	251.261
ENSG00000123689	236.062	-1.65977	2.67156e-14	1	209675420	209676388	G0/G1 switch 2 [Source:HGNC Symbol;Acc:HGNC:30229]	G0S2	protein_coding	92.5666	59.7718	207.09	77.2886	427.804	61.7765	218.052	93.2553	53.7702	13.4885	745.859	205.629	500.952	134.061	1221.83	51.2884	182.704	40.8411	408.59	48.6858	357.554	152.341	99.979	59.8919	367.004	127.349	459.351	140.951
ENSG00000163959	138.476	-1.86861	2.67156e-14	3	196211487	196243178	solute carrier family 51 alpha subunit [Source:HGNC Symbol;Acc:HGNC:29955]	SLC51A	protein_coding	265.52	8.64171	183.997	49.4288	213.203	97.9903	41.2238	23.7377	165.323	14.9084	338.281	173.662	576.678	45.9638	180.89	62.0232	371.207	28.5888	122.955	54.0954	435.702	64.8479	71.2179	15.761	70.4001	11.1955	147.549	42.3411
ENSG00000131263	2961.26	-0.619427	2.6906e-14	X	74585217	74614617	ring finger protein, LIM domain interacting [Source:HGNC Symbol;Acc:HGNC:13429]	RLIM	protein_coding	3108.29	1796.76	3740.28	2546.03	4620.56	2811.18	1565.42	1424.26	2120.31	1384.35	3623.53	2374.24	4304.7	3075.75	4805.93	2927.02	5521.71	2424.6	3773.78	2702.97	3918.11	2313.94	3080.18	2210.75	3031.82	2127.14	3495.71	2085.86
ENSG00000070269	788.134	-0.805833	2.89038e-14	14	56488354	56650606	transmembrane protein 260 [Source:HGNC Symbol;Acc:HGNC:20185]	TMEM260	protein_coding	1212.3	473.134	996.713	565.286	1308.58	604.273	290.736	295.874	678.147	409.625	1050.4	677.367	1309.47	796.707	1251.43	729.965	1557.33	683.408	1068.76	732.091	1107.99	468.346	861.463	491.744	662.454	361.055	884.367	538.735
ENSG00000109519	448.955	-0.881814	3.59007e-14	4	7058906	7068197	GrpE like 1, mitochondrial [Source:HGNC Symbol;Acc:HGNC:19696]	GRPEL1	protein_coding	364.583	223.964	939.354	346.001	796.19	384.15	276.634	224.661	351.513	183.16	731.27	349.915	717.643	243.225	640.517	319.658	783.016	333.536	520.195	373.258	894.955	400.41	371.155	286.851	403.935	258.896	526.166	325.915
ENSG00000155097	2932.19	-0.846604	4.32811e-14	8	103021063	103073051	ATPase H+ transporting V1 subunit C1 [Source:HGNC Symbol;Acc:HGNC:856]	ATP6V1C1	protein_coding	4577.18	1997.68	2935.76	1738.1	4359.82	3348.71	1080.5	930.858	2672.46	956.976	5200.04	2731.07	6279.38	2947.43	4620.93	3114.28	5829.12	2748.61	2148.88	1642.7	5654.49	2506.42	2956.91	1651.76	2298.97	1316.87	2721.77	1133.74
ENSG00000033178	1437.97	-0.876748	4.50543e-14	4	67612652	67701179	ubiquitin like modifier activating enzyme 6 [Source:HGNC Symbol;Acc:HGNC:25581]	UBA6	protein_coding	1713.29	807.28	2487.31	1080.24	3318.97	1280.26	825.561	607.007	1558.53	804.343	1909.33	987.538	2215.84	1038.97	1559.77	1053.2	2320.05	766.451	1280.63	1029.62	2839.02	1388.57	1361.36	1025.52	1247.58	897.039	1953.4	906.434
ENSG00000138772	9435.7	-1.0148	5.25839e-14	4	78551519	78610451	annexin A3 [Source:HGNC Symbol;Acc:HGNC:541]	ANXA3	protein_coding	11853.4	3252.16	11000.3	6946.09	20008.9	7070.92	6263.85	4954.4	7000.56	2163.84	8593.79	5461.27	18258	8203.59	12946	8099.99	20596.2	6214.65	13649.9	9037.53	16799.7	6431.26	11294.9	5983.94	7702.47	3956.21	12816.4	7639.23
ENSG00000188186	868.778	0.660021	8.52915e-14	7	100148907	100155944	late endosomal/lysosomal adaptor, MAPK and MTOR activator 4 [Source:HGNC Symbol;Acc:HGNC:33772]	LAMTOR4	protein_coding	692.626	1091.74	587.003	904.996	471.842	915.996	736.605	1093.63	754.388	1056.37	534.32	893.364	521.923	1226.66	602.694	923.192	388.608	709.274	605.318	980.929	649.806	1179.61	923.094	1278.75	940.592	1340.66	1092.23	1229.56
ENSG00000204933	97.7018	-1.59436	9.61509e-14	19	43372742	43379123	CD177 molecule pseudogene 1 [Source:HGNC Symbol;Acc:HGNC:34508]	CD177P1	unprocessed_pseudogene	140.474	30.246	75.9826	44.0366	177.553	36.2138	5.42419	5.08665	4.81525	0	143.154	117.502	45.4352	3.83032	99.4898	35.7826	218.954	32.6729	94.5809	21.6381	525.626	132.784	145.175	30.4713	15.0033	2.79887	430.584	120.338
ENSG00000237181	75.9491	-1.12319	9.62074e-14	7	603185	608482		AC147651.4	antisense	113.678	55.451	162.394	39.543	106.951	41.8944	147.538	56.801	48.955	14.9084	82.9745	56.1592	150.286	81.3943	35.3559	15.5058	81.2016	24.5047	88.9061	23.4413	220.527	129.696	47.9351	32.5728	78.4788	33.5865	100.222	55.712
ENSG00000135407	66.3025	1.44519	1.13082e-13	12	57797376	57818704	advillin [Source:HGNC Symbol;Acc:HGNC:14188]	AVIL	protein_coding	56.8392	83.5366	23.8377	108.743	27.262	61.7765	46.648	68.6698	33.7067	134.885	21.8834	120.958	15.1451	134.061	19.7335	67.987	46.4009	182.424	35.9408	57.7017	10.7052	42.2026	41.0873	108.226	42.7017	79.7679	39.9032	143.737
ENSG00000127948	1727.08	-1.01626	1.13082e-13	7	75899200	75986855	cytochrome p450 oxidoreductase [Source:HGNC Symbol;Acc:HGNC:9208]	POR	protein_coding	2019.41	1029.08	3226.28	1283.35	3337.15	1474.82	706.229	709.588	1116.33	438.022	3739.32	2058.88	3656.95	808.197	1947.86	1006.68	2262.05	1132.66	1789.47	1134.2	2217.05	1397.83	1661.3	686.131	1851.18	1018.79	3477.15	1172.18
ENSG00000123983	1318.35	-0.902112	1.20285e-13	2	222860934	222944639	acyl-CoA synthetase long-chain family member 3 [Source:HGNC Symbol;Acc:HGNC:3570]	ACSL3	protein_coding	1616.67	881.455	2348.76	1157.53	2824.76	872.682	693.211	554.445	796.121	538.831	2058.86	658.359	2318.36	996.841	1952.79	1077.06	2356.3	1072.76	1441.41	1062.07	2105.71	1175.5	1288.77	854.248	1058.31	699.719	1713.05	739.298
ENSG00000164741	127.231	-1.43967	1.56126e-13	8	13083361	13604610	DLC1 Rho GTPase activating protein [Source:HGNC Symbol;Acc:HGNC:2897]	DLC1	protein_coding	94.1906	33.8467	529.644	80.8835	43.3396	21.3022	40.139	22.0422	76.2414	17.0381	429.462	393.115	242.321	25.8547	286.958	115.697	56.5511	17.6978	344.275	108.191	108.123	34.9973	106.827	38.8772	64.6296	29.3882	162.397	38.4413
ENSG00000163754	4377.46	-1.10684	2.1767e-13	3	148991341	149027668	glycogenin 1 [Source:HGNC Symbol;Acc:HGNC:4699]	GYG1	protein_coding	5762.68	2363.51	3574.91	2474.14	11086.5	2851.66	2607.95	1821.87	2443.74	849.778	6405.45	5871.66	11644.2	3448.25	7557.93	3668.91	9816.7	2138.71	7129.51	3507.18	4372.01	2031.9	4311.42	1565.6	2422.46	1304.28	6286.15	3249.68
ENSG00000019991	1601.02	-1.41125	2.82927e-13	7	81699006	81770438	hepatocyte growth factor [Source:HGNC Symbol;Acc:HGNC:4893]	HGF	protein_coding	4349.82	949.868	7714.47	1341.77	2623.44	847.829	234.325	220.422	1082.63	218.656	4025.63	1443.72	3232.89	644.451	1049.16	809.88	1695.08	394.797	904.194	798.808	4215.71	977.865	1251.79	386.671	361.233	209.916	2014.65	828.995
ENSG00000175066	377.166	-1.30202	3.63204e-13	3	142157527	142225607	glycerol kinase 5 (putative) [Source:HGNC Symbol;Acc:HGNC:28635]	GK5	protein_coding	508.304	178.595	455.896	189.627	1303.68	213.732	210.459	164.468	375.589	159.733	488.729	273.884	842.299	212.583	661.895	205.154	836.667	108.91	497.496	270.477	688.345	201.749	284.872	177.574	266.597	158.136	435.223	189.978
ENSG00000175984	187.455	-1.2169	5.50185e-13	1	114582848	114670422	DENN domain containing 2C [Source:HGNC Symbol;Acc:HGNC:24748]	DENND2C	protein_coding	229.793	97.2193	66.2986	44.0366	300.581	61.0664	311.348	168.707	122.789	42.5954	179.626	101.951	460.177	116.825	171.024	50.0957	207.354	53.0934	295.093	102.781	714.037	188.368	286.241	127.139	185.81	155.338	233.851	175.493
ENSG00000251230	118.886	-1.27984	1.84931e-12	4	184844585	184855751	MIR3945 host gene [Source:HGNC Symbol;Acc:HGNC:52002]	MIR3945HG	lincRNA	87.6947	41.0481	324.788	114.136	537.551	77.3981	67.2599	44.0843	35.3118	26.2671	252.571	102.815	220.186	71.8185	131.557	53.6739	339.307	81.6822	73.7731	43.2763	134.886	31.9093	43.8264	35.725	154.649	75.5696	99.294	26.7418
ENSG00000258227	636.104	-1.62704	2.00811e-12	7	141927357	141947007	C-type lectin domain family 5 member A [Source:HGNC Symbol;Acc:HGNC:2054]	CLEC5A	protein_coding	692.626	187.237	1338.63	550.008	2633.93	264.148	420.917	224.661	703.026	345.732	451.345	215.133	2724.95	137.892	426.737	110.926	1315.18	91.2118	1055.52	485.055	1104.78	203.808	299.937	102.972	361.233	174.93	832.4	356
ENSG00000163421	3827.2	-0.999707	2.19259e-12	3	71771656	71785206	prokineticin 2 [Source:HGNC Symbol;Acc:HGNC:18455]	PROK2	protein_coding	3109.91	1151.51	5383.59	3034.03	7089.52	2519.34	1904.97	1492.09	2074.57	938.518	5072.39	5645.3	8536	3257.69	7785.69	2571.58	11272.5	3333.99	3435.18	1673.35	3716.85	2087.48	4690.8	3093.37	4326.72	2204.11	4136.01	1624.56
ENSG00000146426	131.234	1.21314	2.29156e-12	6	154832697	155257723	T-cell lymphoma invasion and metastasis 2 [Source:HGNC Symbol;Acc:HGNC:11806]	TIAM2	protein_coding	86.8827	152.67	57.3594	266.017	56.6211	136.334	107.399	211.944	40.9296	205.878	39.2077	150.334	43.1052	235.565	96.2008	130.01	82.6517	223.265	56.7486	84.7494	72.7954	137.93	90.392	200.691	153.495	349.859	77.9505	127.58
ENSG00000100605	736.897	0.895716	2.31436e-12	14	92936914	93116320	inositol-tetrakisphosphate 1-kinase [Source:HGNC Symbol;Acc:HGNC:6177]	ITPK1	protein_coding	430.354	1034.12	749.397	1139.56	397.047	739.898	622.697	912.207	501.588	991.052	461.375	1343.5	573.183	1219.96	559.938	902.915	271.155	853.579	321.575	578.82	280.476	866.697	506.743	708.196	847.11	1286.08	690.418	843.48
ENSG00000167261	479.317	1.41774	2.3824e-12	16	67987394	68000586	dipeptidase 2 [Source:HGNC Symbol;Acc:HGNC:23028]	DPEP2	protein_coding	557.024	1184.63	190.701	965.209	60.1162	462.969	176.829	780.801	209.463	815.701	138.595	771.541	131.646	585.081	328.892	635.738	136.303	748.753	276.176	405.715	133.815	552.751	572.483	671.42	403.935	576.568	342.425	605.589
ENSG00000069329	2973.4	-0.629955	2.99745e-12	16	46656132	46689518	VPS35, retromer complex component [Source:HGNC Symbol;Acc:HGNC:13487]	VPS35	protein_coding	3195.17	1820.52	4106.79	2913.6	5311.9	2952.49	1897.38	1585.34	2448.55	1492.97	4042.05	2019.14	4674	2907.21	4399.75	2941.33	3865.78	2274.85	3291.42	2908.53	3606.58	1810.59	2926.78	2244.37	2835.62	2220.91	4270.57	2290.88
ENSG00000110060	127.235	-0.919653	2.99745e-12	11	125893485	125903221	pseudouridylate synthase 3 [Source:HGNC Symbol;Acc:HGNC:25461]	PUS3	protein_coding	152.654	80.656	140.046	81.7822	208.31	111.482	104.144	62.7354	159.706	76.6717	127.653	66.5271	205.041	60.3275	132.379	84.6855	279.856	83.0436	134.305	70.324	342.567	144.106	80.805	76.7037	133.876	75.5696	179.1	107.524
ENSG00000127951	6540.01	0.972926	5.87724e-12	7	77193371	77199848	fibrinogen like 2 [Source:HGNC Symbol;Acc:HGNC:3696]	FGL2	protein_coding	3588.17	4629.08	4099.34	11053.2	4057.84	9637.84	5335.23	7871.6	7397.82	13669.6	1739.73	5959.79	2186.72	8095.38	2724.87	5629.8	2470.85	4695.36	3193.05	6220.97	4336.68	13439	4386.75	7527.47	8690.38	14303.6	7694.82	8485.49
ENSG00000127946	1342.51	-1.11325	8.33241e-12	7	75533300	75738962	huntingtin interacting protein 1 [Source:HGNC Symbol;Acc:HGNC:4913]	HIP1	protein_coding	1864.32	926.824	1681.3	471.82	2004.11	712.205	858.107	780.801	950.208	486.297	2457.32	2028.64	3767.63	1050.47	2066.26	951.818	2257.7	563.607	1855.68	555.379	2118.56	670.095	991.573	361.453	1554.57	1347.66	1479.2	776.625
ENSG00000113448	1197.19	-1.25052	9.82265e-12	5	58969038	60522120	phosphodiesterase 4D [Source:HGNC Symbol;Acc:HGNC:8783]	PDE4D	protein_coding	1096.18	470.973	1457.82	423.29	3242.08	644.748	598.83	371.326	656.478	589.236	2778.28	847.572	3264.35	923.107	2910.69	774.097	2940.66	492.816	1545.45	833.069	2359.43	675.241	710.81	543.23	485.876	365.253	1005	515.336
ENSG00000104375	512.513	-0.710446	1.16177e-11	8	98401403	98942827	serine/threonine kinase 3 [Source:HGNC Symbol;Acc:HGNC:11406]	STK3	protein_coding	709.677	403.28	801.542	639.878	903.141	489.951	295.076	159.382	349.908	272.61	701.18	298.94	622.113	383.99	549.249	422.235	1174.52	488.732	592.077	348.014	772.916	432.319	467.025	381.417	468.565	333.066	586.484	303.073
ENSG00000099985	337.922	-1.2056	1.27102e-11	22	30262829	30266840	oncostatin M [Source:HGNC Symbol;Acc:HGNC:8506]	OSM	protein_coding	285.82	151.95	314.359	86.2757	683.647	112.902	186.592	161.077	169.336	57.5038	607.264	194.397	950.645	300.68	1113.3	242.129	616.262	190.592	423.723	266.87	579.152	233.658	338.285	183.879	296.604	181.927	292.314	240.676
ENSG00000152518	463.459	1.2051	1.59975e-11	2	43222402	43226609	ZFP36 ring finger protein like 2 [Source:HGNC Symbol;Acc:HGNC:1108]	ZFP36L2	protein_coding	277.7	610.681	137.067	417.898	83.8831	473.62	456.717	443.387	448.62	1271.47	413.049	1109.36	213.196	1021.74	420.981	635.738	127.603	586.75	179.704	310.147	114.546	326.298	291.72	436.055	483.568	843.861	204.156	637.345
ENSG00000065911	835.106	-0.624835	1.59975e-11	2	74198562	74217565	methylenetetrahydrofolate dehydrogenase (NADP+ dependent) 2, methenyltetrahydrofolate cyclohydrolase [Source:HGNC Symbol;Acc:HGNC:7434]	MTHFD2	protein_coding	819.296	491.137	1012.36	576.07	1079.3	693.033	892.821	591.747	698.211	438.732	786.89	578.872	781.719	478.79	831.274	640.509	798.966	351.233	936.351	724.878	2193.5	1620.17	594.396	499.1	949.825	645.141	1842.97	835.68
ENSG00000136634	58.9622	-1.46034	1.59975e-11	1	206767602	206772494	interleukin 10 [Source:HGNC Symbol;Acc:HGNC:5962]	IL10	protein_coding	60.0871	24.4849	18.6232	8.98705	168.465	22.0123	31.4603	9.32553	65.0058	17.0381	93.9162	82.9428	249.311	45.9638	129.912	28.6261	118.902	13.6137	52.9653	19.835	164.86	43.2319	32.8698	27.3191	41.5476	18.1927	43.6151	17.8278
ENSG00000183019	2161.36	-1.32634	1.63522e-11	19	7676628	7679826	mast cell expressed membrane protein 1 [Source:HGNC Symbol;Acc:HGNC:27291]	MCEMP1	protein_coding	2155.02	1016.84	5079.66	2097.58	7145.44	1301.57	1627.26	1130.08	827.42	124.946	3830.51	3674.54	9858.28	1449.78	2832.58	1745	3143.66	1044.17	1838.65	724.878	1920.51	759.647	1358.62	213.299	836.723	383.446	1728.83	669.101
ENSG00000169756	3220.42	-0.686088	1.88973e-11	2	108534355	108687246	LIM zinc finger domain containing 1 [Source:HGNC Symbol;Acc:HGNC:6616]	LIMS1	protein_coding	4243.45	3460.29	3383.46	2269.23	4630.35	1947.73	3134.1	1947.34	1400.43	658.098	2473.74	1591.47	4040.24	3491.34	5099.47	2836.37	5170.8	2451.83	3978.07	2127.75	6247.56	3653.1	4290.88	2866.41	3696.58	3210.31	3670.17	2201.18
ENSG00000240225	65.7181	-1.09802	2.46074e-11	19	56368099	56379828	zinc finger protein 542, pseudogene [Source:HGNC Symbol;Acc:HGNC:25393]	ZNF542P	transcribed_unprocessed_pseudogene	145.346	33.8467	56.6145	29.6573	41.2425	17.0418	42.3087	27.1288	38.522	31.2366	74.7683	25.9196	96.6955	35.4305	115.934	42.9391	107.302	40.8411	56.7486	34.2604	185.2	64.8479	235.567	77.7545	64.6296	50.3797	41.7592	26.1846
ENSG00000143641	1171.67	-1.18217	2.79216e-11	1	230057990	230282124	polypeptide N-acetylgalactosaminyltransferase 2 [Source:HGNC Symbol;Acc:HGNC:4124]	GALNT2	protein_coding	1264.27	550.909	1775.16	1046.09	1782.52	1216.36	504.45	441.691	1253.57	342.893	1886.53	1780.68	2899.7	426.123	1532.64	701.339	2597	805.931	1829.2	683.405	1786.7	641.274	994.312	321.525	979.831	397.44	1880.09	485.252
ENSG00000127952	229.92	-0.647429	3.36383e-11	7	75996338	76048004	serine/threonine/tyrosine interacting like 1 [Source:HGNC Symbol;Acc:HGNC:18165]	STYXL1	protein_coding	261.46	192.278	407.475	231.866	334.134	203.791	211.543	140.731	188.597	115.717	250.747	146.878	307.561	170.449	175.957	162.215	301.606	198.76	223.211	113.6	416.433	339.679	254.741	176.524	251.594	144.142	351.705	164.35
ENSG00000152229	1992.44	-0.88637	6.25168e-11	18	45983536	46072272	proline-serine-threonine phosphatase interacting protein 2 [Source:HGNC Symbol;Acc:HGNC:9581]	PSTPIP2	protein_coding	2941.83	1559.11	2188.6	1263.58	5044.87	1732.58	1154.27	829.125	915.699	616.923	2243.96	927.059	4973.41	1444.99	2120.53	1372.86	3591.72	1268.8	2035.38	1606.63	4622.51	2644.35	2033.82	789.103	1316.83	1024.39	2084.25	1441.27
ENSG00000078124	1663.19	-0.859142	7.03754e-11	11	76860867	77026797	alkaline ceramidase 3 [Source:HGNC Symbol;Acc:HGNC:16066]	ACER3	protein_coding	2824.91	895.858	3254.59	1570.04	1735.68	1710.57	763.726	493.405	1248.75	780.205	2484.68	1848.07	2847.27	1371.25	2227.42	1681.78	2412.85	761.006	1632.47	977.323	2974.98	1640.75	1842.08	861.603	1425.31	709.515	2529.68	1063.54
ENSG00000188158	41.7459	1.45913	9.40145e-11	X	17375420	17735994	NHS actin remodeling regulator [Source:HGNC Symbol;Acc:HGNC:7820]	NHS	protein_coding	28.4196	64.0927	11.1739	100.655	10.4854	44.0246	11.9332	39.8455	36.1143	105.779	11.8535	82.9428	6.99003	81.3943	37.8225	45.3247	18.8504	51.732	17.0246	37.8668	7.49364	39.1146	27.3915	55.689	46.164	90.9634	17.6317	40.1126
ENSG00000117280	847.962	-0.916152	9.45081e-11	1	205767986	205775460	RAB29, member RAS oncogene family [Source:HGNC Symbol;Acc:HGNC:9789]	RAB29	protein_coding	981.693	533.626	1585.21	895.11	1567.91	952.21	535.91	319.611	850.693	433.053	626.412	456.186	1797.6	680.839	838.674	593.992	1798.04	435.638	1066.87	421.944	1589.72	504.372	695.744	630.442	1084.85	696.92	803.632	366.028
ENSG00000198730	1260.38	-0.526578	1.33164e-10	11	10750987	10779743	CTR9 homolog, Paf1/RNA polymerase II complex component [Source:HGNC Symbol;Acc:HGNC:16850]	CTR9	protein_coding	1176.57	982.995	3055.69	2164.08	1548.34	1163.1	1045.78	878.296	1060.96	774.526	1526.37	1115.41	1855.85	966.198	1683.93	1282.21	1510.93	1110.88	1051.74	778.973	1575.81	913.017	914.877	496.998	1320.29	950.218	1521.89	864.65
ENSG00000196352	10839.3	-0.753091	1.42141e-10	1	207321508	207386804	CD55 molecule (Cromer blood group) [Source:HGNC Symbol;Acc:HGNC:2665]	CD55	protein_coding	10185.6	5424.12	15311.2	9839.92	27134.1	10874.1	6087.02	5753.01	5892.26	2293.05	14968.2	11358.8	13933.5	9379.5	14270.6	11072.3	20284.5	10406.3	13678.3	8812.14	14184.4	7608.82	11915.3	6070.1	6834.58	4968	17781.1	7180.72
ENSG00000148154	5371.35	-1.24994	1.52333e-10	9	111896766	111935369	UDP-glucose ceramide glucosyltransferase [Source:HGNC Symbol;Acc:HGNC:12524]	UGCG	protein_coding	5022.15	2236.04	7487.27	2881.25	21810.3	2659.94	3219.8	3145.25	3697.31	1590.94	5492.73	2633.44	10052.8	2517.48	7005.39	2002.63	21432.9	3377.56	7536.21	4064.37	10167.8	2920.21	3821.12	1947.01	1948.12	1256.69	4767.97	3703.18
ENSG00000185222	49.5734	-1.19674	1.74513e-10	X	103356445	103358469	transcription elongation factor A like 9 [Source:HGNC Symbol;Acc:HGNC:30084]	TCEAL9	protein_coding	60.8991	36.0071	44.6957	13.4806	78.2909	23.4325	80.278	21.1944	15.2483	4.25954	45.5904	4.31994	83.8804	36.388	107.712	44.1319	53.6511	21.7819	32.1575	18.0318	119.898	74.1119	75.3267	42.0294	84.2493	61.5752	79.8064	25.6275
ENSG00000198604	9239.09	-0.70707	1.89326e-10	14	34752731	34875647	bromodomain adjacent to zinc finger domain 1A [Source:HGNC Symbol;Acc:HGNC:960]	BAZ1A	protein_coding	12297.6	6477.68	9871.78	8408.29	16039.1	8084.2	5666.11	3648.83	5182.81	3160.58	9915	8677.03	18884.7	8010.16	14065.1	10262.5	18105.1	7027.39	13772.9	8473.14	12445.9	7759.1	7995.58	4258.63	7380.47	6269.48	10772	5783.46
ENSG00000123836	6516.88	-1.29801	2.09678e-10	1	207034366	207081024	6-phosphofructo-2-kinase/fructose-2,6-biphosphatase 2 [Source:HGNC Symbol;Acc:HGNC:8873]	PFKFB2	protein_coding	9281.02	3367.39	9187.19	3158.95	11847.8	3436.05	1655.46	2724.75	1511.99	240.664	12690.5	4669.85	22849.3	4178.88	10878.1	5484.28	12267.2	4755.26	10409.6	8217.09	9374.55	3888.81	7443.64	1032.87	2385.53	909.634	10993.8	3632.42
ENSG00000163737	2715.04	-1.09131	2.83481e-10	4	73981077	73982124	platelet factor 4 [Source:HGNC Symbol;Acc:HGNC:8861]	PF4	protein_coding	3700.23	3424.28	2331.62	1424.45	4085.81	847.119	3757.88	1311.51	312.991	188.13	3888.86	862.26	5821.53	1775.35	3674.54	1473.05	2710.1	1990.32	2358.85	586.033	7024.76	2917.13	5192.06	2407.24	3558.09	2658.93	3594.07	2143.8
ENSG00000173334	888.763	-1.31819	2.94917e-10	8	125430321	125438405	tribbles pseudokinase 1 [Source:HGNC Symbol;Acc:HGNC:16891]	TRIB1	protein_coding	881.007	596.278	1375.88	471.82	3579.71	559.539	326.536	631.593	422.939	252.733	2098.07	678.231	2155.26	338.026	1554.84	339.935	1532.68	555.439	1182.26	384.077	1283.55	385.999	579.33	190.183	491.647	293.882	1359.49	384.413
ENSG00000167553	344.549	-0.890176	3.0703e-10	12	49188736	49274603	tubulin alpha 1c [Source:HGNC Symbol;Acc:HGNC:20768]	TUBA1C	protein_coding	315.863	263.572	426.844	207.601	600.463	218.703	404.644	311.981	275.272	190.969	356.517	203.037	534.738	106.291	460.448	196.804	455.309	257.299	518.304	279.493	517.061	293.359	395.807	225.908	563.201	310.675	499.254	257.947
ENSG00000125430	305.461	-1.31272	3.66129e-10	17	14301083	14349404	heparan sulfate-glucosamine 3-sulfotransferase 3B1 [Source:HGNC Symbol;Acc:HGNC:5198]	HS3ST3B1	protein_coding	535.1	270.054	1117.39	156.375	472.541	147.695	73.769	118.689	97.91	61.7633	788.714	338.683	891.229	146.51	504.027	134.781	565.511	319.922	357.516	142.451	306.169	151.312	172.567	44.1309	99.2526	39.1842	425.016	74.6541
ENSG00000134333	8155.2	-1.0318	3.91102e-10	11	18394388	18408425	lactate dehydrogenase A [Source:HGNC Symbol;Acc:HGNC:6535]	LDHA	protein_coding	11110.4	3795.87	14958.9	8432.55	11791.9	7169.62	5489.28	4828.93	5496.6	1739.31	11351.1	7326.62	17329.5	3103.52	11168.3	7293.69	10757.8	4146.73	13205.4	10914.6	12211.4	5366.93	6475.35	2580.61	5539.68	2987.8	17068.4	4704.88
ENSG00000237298	1265.4	-0.779449	4.44881e-10	2	178521183	178779963	TTN antisense RNA 1 [Source:HGNC Symbol;Acc:HGNC:44124]	TTN-AS1	antisense	1367.39	517.783	1060.78	653.359	1709.12	794.573	918.857	769.78	768.834	636.091	2218.43	929.651	2867.08	1466.05	2084.35	1103.3	2701.4	1021.03	1193.61	860.116	2701.99	1329.9	1157.29	655.659	632.447	450.619	1508.9	1352.69
ENSG00000143322	403.354	-0.861017	4.44881e-10	1	179099327	179229684	ABL proto-oncogene 2, non-receptor tyrosine kinase [Source:HGNC Symbol;Acc:HGNC:77]	ABL2	protein_coding	476.637	399.679	838.789	328.027	930.403	271.959	176.829	143.274	447.015	309.526	696.621	394.842	687.353	246.098	414.404	207.539	967.169	355.317	287.526	146.057	608.056	325.269	299.937	198.589	330.073	222.511	341.497	242.904
ENSG00000160883	12027.8	-0.895768	4.50639e-10	5	176880869	176899332	hexokinase 3 [Source:HGNC Symbol;Acc:HGNC:4925]	HK3	protein_coding	18179.6	6722.53	13338.7	9915.41	17000.3	12740.9	4876.35	5134.13	11616.8	4455.48	19849.2	14213.5	19930.9	7105.24	9722.86	6551.8	16307	5480.87	17546.7	10597.3	22341.8	11989.7	14361.4	4960.52	11760.3	5816.06	24194.3	10067.7
ENSG00000140563	6136.09	-0.558514	4.55227e-10	15	94231538	94483952	multiple C2 and transmembrane domain containing 2 [Source:HGNC Symbol;Acc:HGNC:25636]	MCTP2	protein_coding	8338.3	4139.38	4459.88	4337.15	6872.12	5780.72	3170.98	2293.23	4576.89	2876.61	8740.59	6539.52	9838.47	7469.12	10607.6	6296.55	11527.7	5970.97	8207.73	5800.83	8220.53	6039.09	6541.09	4049.54	4623.33	2765.29	7111.12	4616.3
ENSG00000102316	519.879	-0.5819	4.96171e-10	X	54807599	54816012	MAGE family member D2 [Source:HGNC Symbol;Acc:HGNC:16353]	MAGED2	protein_coding	591.939	365.833	633.188	389.139	530.561	404.742	782.168	373.869	597.09	314.496	547.085	324.859	575.513	486.451	499.093	265.984	420.508	285.888	516.412	331.785	769.704	581.572	675.201	557.941	768.631	638.143	782.289	546.535
ENSG00000116574	1154.05	-1.08481	5.89847e-10	1	228735077	228746669	ras homolog family member U [Source:HGNC Symbol;Acc:HGNC:17794]	RHOU	protein_coding	1453.46	422.004	1684.28	730.647	1663.68	1188.66	548.928	330.633	2377.13	609.114	3374.6	1974.21	2306.71	617.639	1199.63	713.267	1209.32	328.09	1350.62	1058.47	1112.27	896.548	719.027	438.157	1338.76	576.568	1767.81	323.13
ENSG00000183722	65.8611	-1.26278	5.96744e-10	13	39342892	39603528	lipoma HMGIC fusion partner [Source:HGNC Symbol;Acc:HGNC:6586]	LHFP	protein_coding	124.234	33.1266	63.3188	38.6443	90.1743	18.4619	123.671	25.4333	13.6432	2.83969	71.121	40.6074	97.8605	25.8547	83.0452	16.6986	24.6505	23.1433	52.9653	14.4254	100.629	85.4345	173.936	47.2831	171.961	107.757	122.494	50.6979
ENSG00000148660	725.101	0.768295	6.53536e-10	10	73812501	73874591	calcium/calmodulin dependent protein kinase II gamma [Source:HGNC Symbol;Acc:HGNC:1463]	CAMK2G	protein_coding	641.47	1105.42	418.649	966.108	320.853	776.111	516.383	699.415	568.199	937.808	353.782	948.659	471.827	1238.15	807.429	861.168	580.012	1063.23	525.87	703.24	378.964	694.799	709.44	870.009	752.473	1087.36	468.631	837.351
ENSG00000167680	123.473	-1.43854	6.71692e-10	19	4542593	4559808	semaphorin 6B [Source:HGNC Symbol;Acc:HGNC:10739]	SEMA6B	protein_coding	43.0354	23.7647	575.829	43.1378	324.348	57.516	50.9874	43.2366	52.9677	21.2977	700.269	201.309	164.266	56.4972	131.557	59.6377	165.303	19.0592	87.0145	48.6858	70.6544	20.5866	17.8045	23.1162	132.722	23.7904	220.86	77.9968
ENSG00000167460	5009.08	-0.702979	7.40315e-10	19	16067021	16103005	tropomyosin 4 [Source:HGNC Symbol;Acc:HGNC:12013]	TPM4	protein_coding	4443.2	4047.2	5000.7	3348.58	8049.98	3908.25	7046.02	2713.73	2900.38	1819.53	4549.01	3186.39	9910.7	4739.06	7491.33	4562.28	6816.59	3076.7	4659.06	3206.05	6417.77	3710.74	4804.47	3860.4	5603.16	4893.83	10399.9	5089.29
ENSG00000266970	13.9247	-1.4936	8.90622e-10	17	78360453	78373911		RP11-806H10.4	lincRNA	17.0517	10.8021	26.8174	4.49353	48.2328	9.94104	10.8484	4.23888	8.02541	1.41985	29.1779	8.63988	17.4751	4.7879	15.6224	3.57826	36.2507	10.891	7.56647	1.80318	32.1156	9.26398	16.4349	3.15221	12.6951	9.79606	23.1995	5.5712
ENSG00000137312	4947.96	-0.683992	8.93072e-10	6	30727709	30742733	flotillin 1 [Source:HGNC Symbol;Acc:HGNC:3757]	FLOT1	protein_coding	5170.74	3965.83	7835.89	5139.69	10340	4373.35	3123.25	3227.48	3289.62	1747.12	7181.4	5413.75	8886.66	3786.27	6267.85	4246.2	6700.59	3460.6	5655.94	4210.42	5273.38	3461.64	3554.05	2252.78	4891.08	2811.47	8342.56	3933.27
ENSG00000085514	282.84	1.23865	9.65421e-10	7	100367530	100400099	paired immunoglobin like type 2 receptor alpha [Source:HGNC Symbol;Acc:HGNC:20396]	PILRA	protein_coding	75.5149	300.3	176.548	348.698	71.3006	100.121	486.007	437.452	73.0312	389.748	148.625	569.368	285.426	990.138	335.47	640.509	37.7008	157.919	90.7977	109.994	34.2567	271.744	102.718	273.191	249.286	492.602	167.965	503.079
ENSG00000140030	1224.24	-0.51551	1.04093e-09	14	88005124	88014811	G protein-coupled receptor 65 [Source:HGNC Symbol;Acc:HGNC:4517]	GPR65	protein_coding	1129.48	652.449	1118.14	769.292	1734.98	1334.23	939.469	770.628	1106.7	753.938	1171.67	746.486	2073.71	1330.08	2630.31	1490.94	1445.68	761.006	1257.93	962.898	1458.05	1096.24	1247.68	1208.35	1731.15	1344.86	1190.6	821.752
ENSG00000167644	12.8398	-1.54628	1.44549e-09	19	38304161	38305009	chromosome 19 open reading frame 33 [Source:HGNC Symbol;Acc:HGNC:16668]	C19orf33	protein_coding	18.6757	5.041	11.1739	3.59482	39.8445	4.26045	9.76354	1.69555	0.802541	0	18.2362	6.9119	36.1152	6.70306	8.22229	2.38551	18.8504	8.16822	22.6994	3.60636	29.9746	12.352	28.7611	5.25368	30.0066	11.1955	10.2078	5.01408
ENSG00000171049	9228.74	-0.961925	1.45994e-09	19	51752026	51770526	formyl peptide receptor 2 [Source:HGNC Symbol;Acc:HGNC:3827]	FPR2	protein_coding	11319.9	4742.86	18028.7	10608.3	20412.3	9770.63	3306.59	3607.29	3688.48	2597.61	16394.3	8817.86	15471.3	3589.01	12395.9	6572.07	16756.5	7049.17	10001	7557.12	11833.5	6234.66	9525.4	3981.24	10223	5628.54	14999.9	3291.46
ENSG00000145365	951.568	-0.815886	1.53956e-09	4	112274542	112285903	TRAF interacting protein with forkhead associated domain [Source:HGNC Symbol;Acc:HGNC:19075]	TIFA	protein_coding	927.29	590.517	1607.55	890.617	1999.21	720.726	726.841	308.59	656.478	378.389	904.514	863.124	799.194	648.282	647.917	427.006	1709.58	491.454	1013.91	441.779	2858.29	1497.68	719.027	586.311	1157.56	649.339	1569.22	853.508
ENSG00000139832	519.699	-0.956718	1.62333e-09	13	110523066	110561733	RAB20, member RAS oncogene family [Source:HGNC Symbol;Acc:HGNC:18260]	RAB20	protein_coding	233.853	186.517	1279.79	602.132	1208.62	413.263	419.832	320.459	247.985	176.061	1182.62	405.21	387.947	243.225	624.894	212.31	807.666	224.626	694.224	400.306	1067.31	633.039	124.631	135.545	757.09	291.083	957.677	313.659
ENSG00000262370	48.3105	1.20031	1.65125e-09	16	3076911	3087100		RP11-473M20.9	lincRNA	45.4713	57.6114	17.1333	41.3404	4.89318	23.4325	29.2906	39.8455	33.7067	121.397	32.8251	39.7434	33.7852	181.94	46.8671	93.0348	20.3004	68.0685	22.6994	70.324	10.7052	45.2906	20.5436	59.8919	34.623	58.7764	25.0555	74.097
ENSG00000170791	415.804	-1.01214	1.76398e-09	8	56211686	56218798	coiled-coil-helix-coiled-coil-helix domain containing 7 [Source:HGNC Symbol;Acc:HGNC:28314]	CHCHD7	protein_coding	309.367	146.909	989.264	337.014	838.831	355.747	254.937	152.6	426.149	241.374	1112.41	290.3	1145.2	307.383	393.026	258.828	452.409	151.112	410.481	292.115	998.796	286.154	143.805	170.219	256.21	202.918	473.271	245.69
ENSG00000198642	703.035	-0.611876	2.14943e-09	9	21329671	21335380	kelch like family member 9 [Source:HGNC Symbol;Acc:HGNC:18732]	KLHL9	protein_coding	753.525	472.414	957.232	662.346	1114.25	602.143	518.552	408.628	756.796	570.068	1089.61	619.479	1121.9	468.257	844.43	713.267	901.918	462.866	673.416	627.506	1015.92	579.514	673.831	416.091	662.454	464.613	898.286	635.674
ENSG00000079385	1115.95	-1.74109	2.14943e-09	19	42507304	42561234	carcinoembryonic antigen related cell adhesion molecule 1 [Source:HGNC Symbol;Acc:HGNC:1814]	CEACAM1	protein_coding	895.623	143.308	3051.97	274.105	4162	283.32	517.468	687.546	345.895	239.954	4449.62	1137.01	3291.14	206.837	1144.54	271.948	3107.41	208.29	1227.66	304.737	2409.74	249.098	347.872	72.5008	522.807	139.944	855.599	698.628
ENSG00000198948	756.797	-0.836545	2.18886e-09	4	169986597	170033031	microfibrillar associated protein 3 like [Source:HGNC Symbol;Acc:HGNC:29083]	MFAP3L	protein_coding	1046.65	707.9	484.948	413.404	768.928	228.644	1002.39	567.162	243.972	88.0304	485.994	241.917	1401.5	772.767	1553.19	609.497	1233.97	575.859	766.106	284.902	1073.73	632.01	1653.08	1029.72	1065.23	863.453	725.682	669.658
ENSG00000142166	4256.12	-0.656842	2.2658e-09	21	33324477	33359862	interferon alpha and beta receptor subunit 1 [Source:HGNC Symbol;Acc:HGNC:5432]	IFNAR1	protein_coding	3812.28	3095.89	7335.3	5261.02	6631.66	3656.88	3104.81	3010.45	3044.04	1840.12	5670.53	5326.49	5124.86	2949.35	6021.19	3605.7	7385	3596.74	5302.21	2697.56	4437.31	2635.09	4038.88	2618.43	5421.96	3319.47	5864.84	2363.3
ENSG00000118113	26454.1	-1.97371	2.32985e-09	11	102711795	102727050	matrix metallopeptidase 8 [Source:HGNC Symbol;Acc:HGNC:7175]	MMP8	protein_coding	33732.4	1497.18	54639.7	3930.04	114641	4519.62	10368.9	8075.91	17432.8	2444.97	41430.7	9640.38	110036	1285.07	9524.7	1400.29	94334.6	544.548	16402.2	5761.16	143280	4357.16	9051.53	1032.87	2106.23	848.059	24714	13682.3
ENSG00000213722	1396.94	-0.954494	2.42305e-09	6	31727038	31730617	dimethylarginine dimethylaminohydrolase 2 [Source:HGNC Symbol;Acc:HGNC:2716]	DDAH2	protein_coding	1571.2	879.294	2479.12	1179.1	2380.88	1323.58	921.027	640.071	1095.47	325.145	1413.3	1650.22	2779.7	846.501	1720.1	813.458	2177.94	522.766	1884.05	1224.36	2081.09	1351.51	1095.66	605.224	1208.34	691.322	3246.08	1007.83
ENSG00000100784	201.232	0.887945	2.59263e-09	14	90847862	91060636	ribosomal protein S6 kinase A5 [Source:HGNC Symbol;Acc:HGNC:10434]	RPS6KA5	protein_coding	81.1988	182.196	169.099	199.513	72.6987	155.506	236.495	488.319	156.495	476.358	73.8565	145.15	97.8605	237.48	243.38	233.78	133.403	437	124.847	203.759	82.4301	95.7278	135.588	297.358	225.05	379.248	83.5184	187.192
ENSG00000131873	2183.82	-0.888533	2.74746e-09	15	101175723	101251932	chondroitin sulfate synthase 1 [Source:HGNC Symbol;Acc:HGNC:17198]	CHSY1	protein_coding	1947.96	1269.61	3382.72	2534.35	5117.57	1677.91	944.894	1113.98	1593.04	1083.34	3520.49	2100.35	3058.14	1391.36	3442.67	1382.4	5971.22	1641.81	2924.44	1365.01	2987.82	1109.62	1383.27	920.445	2173.17	1364.45	2590	1154.91
ENSG00000136231	123.406	-0.872775	2.81833e-09	7	23310209	23470467	insulin like growth factor 2 mRNA binding protein 3 [Source:HGNC Symbol;Acc:HGNC:28868]	IGF2BP3	protein_coding	142.098	106.581	104.29	49.4288	99.2617	34.7937	120.417	42.3888	40.127	19.1679	120.359	91.5827	192.226	111.079	237.624	96.6131	189.954	78.9594	147.546	45.0795	355.413	183.221	180.784	136.596	151.187	141.343	150.333	86.9107
ENSG00000168405	270.127	-1.0342	2.83409e-09	6	25081068	25166555	cytidine monophospho-N-acetylneuraminic acid hydroxylase, pseudogene [Source:HGNC Symbol;Acc:HGNC:2098]	CMAHP	unitary_pseudogene	371.078	91.4581	484.948	139.299	235.572	184.619	157.301	97.4942	170.941	118.557	1233.68	216.861	362.317	196.304	379.87	214.696	303.056	96.6573	501.279	227.201	504.215	195.573	193.11	140.799	204.276	139.944	248.699	153.765
ENSG00000166148	60.7595	-1.25158	2.98765e-09	12	63142759	63150942	arginine vasopressin receptor 1A [Source:HGNC Symbol;Acc:HGNC:895]	AVPR1A	protein_coding	80.3868	31.6863	39.4812	17.0754	78.9899	7.81082	119.332	33.0633	6.42033	1.41985	43.7668	8.63988	79.2204	49.7942	185.002	46.5174	97.152	53.0934	49.1821	41.4731	308.31	69.9945	69.8484	46.2324	56.5509	32.1871	32.4794	16.1565
ENSG00000141096	23.3381	1.59148	3.02885e-09	16	67975663	67980829	dipeptidase 3 [Source:HGNC Symbol;Acc:HGNC:23029]	DPEP3	protein_coding	10.5558	23.7647	2.23478	26.0624	3.49513	27.6929	8.6787	50.0188	19.261	104.359	4.55904	24.1917	2.33001	31.6001	13.9779	19.0841	2.90006	38.1184	20.8078	23.4413	1.07052	13.3813	16.4349	40.9787	33.4689	60.1758	4.63991	26.1846
ENSG00000170989	1332.77	-1.65884	3.02885e-09	1	101236888	101241518	sphingosine-1-phosphate receptor 1 [Source:HGNC Symbol;Acc:HGNC:3165]	S1PR1	protein_coding	1385.25	332.706	4269.93	630.891	5336.36	628.416	233.24	246.703	472.697	327.984	2811.1	770.677	4129.94	178.11	1551.55	496.186	4969.25	765.09	769.889	468.827	2744.81	341.738	599.874	347.794	490.493	194.522	1653.66	169.922
ENSG00000265972	45813.3	1.05174	3.05745e-09	1	145992435	145996600	thioredoxin interacting protein [Source:HGNC Symbol;Acc:HGNC:16952]	TXNIP	protein_coding	38536.9	85065.4	37045.3	84656.2	25864	66691.6	15780	22533.9	12447.4	27670.7	39684.6	60554.3	17939.9	94881.8	23926.9	66841.9	26026.6	80911.6	20834.3	59142.5	13546.4	55693	32982.1	48765.7	33527.8	59029.7	76902.8	55288.6
ENSG00000054793	845.002	-1.39212	3.2492e-09	20	51596514	51768634	ATPase phospholipid transporting 9A (putative) [Source:HGNC Symbol;Acc:HGNC:13540]	ATP9A	protein_coding	520.484	252.77	426.099	275.004	1744.07	311.013	536.995	408.628	760.006	92.9999	943.721	982.354	3842.19	317.917	1655.97	542.703	2905.86	402.965	1719.48	524.725	1456.98	283.066	756.006	261.633	304.682	138.544	718.258	574.948
ENSG00000173744	6934.36	-0.717691	3.45918e-09	2	227472152	227561214	ArfGAP with FG repeats 1 [Source:HGNC Symbol;Acc:HGNC:5175]	AGFG1	protein_coding	9332.99	4554.9	10055.8	5861.35	12561.5	7474.95	2535.27	2832.42	4059.25	1861.42	10757.5	5907.95	13589.8	6947.24	14169.5	8400.57	10302.5	6271.83	7216.53	6682.58	6629.73	5184.74	6226.09	2968.33	4248.24	2784.88	10617	4127.15
ENSG00000164136	100.085	1.3553	3.50403e-09	4	141636599	141733987	interleukin 15 [Source:HGNC Symbol;Acc:HGNC:5977]	IL15	protein_coding	38.9754	102.26	18.6232	61.1119	41.2425	173.258	108.484	88.1687	76.2414	237.824	31.9133	190.077	6.99003	104.376	15.6224	46.5174	30.4506	85.7663	28.3743	113.6	51.385	239.834	56.1526	212.249	53.0886	127.349	252.411	210.034
ENSG00000123505	2072.14	0.559057	4.70307e-09	6	110874770	110895713	adenosylmethionine decarboxylase 1 [Source:HGNC Symbol;Acc:HGNC:457]	AMD1	protein_coding	1936.59	2509.7	1470.49	2502	1637.82	2009.51	1762.86	2861.24	1247.95	1730.08	1156.17	1543.95	1190.64	3096.81	1892.77	2309.17	2251.9	2775.83	1517.08	2133.16	1664.66	2721.55	2040.67	3199.49	1860.41	2938.82	1678.72	2380.02
ENSG00000021355	12805.9	-0.973712	4.94042e-09	6	2832332	2842006	serpin family B member 1 [Source:HGNC Symbol;Acc:HGNC:3311]	SERPINB1	protein_coding	20548.2	8790.78	27724	12560.3	21488.7	12417.8	5738.79	6682.17	7236.51	3907.42	20193.8	13010.8	20899	5428.52	15198.9	10614.3	16125.8	8912.89	18327.9	12674.5	19618.4	10251.1	13820.4	4274.39	9580.19	3743.49	24005	4792.35
ENSG00000183049	559.578	0.914474	5.25568e-09	10	12349482	12835545	calcium/calmodulin dependent protein kinase ID [Source:HGNC Symbol;Acc:HGNC:19341]	CAMK1D	protein_coding	277.7	545.148	791.113	976.892	570.405	976.352	479.498	1173.32	433.372	1233.14	547.085	1376.33	150.286	662.645	375.759	1003.11	240.705	490.093	119.172	218.185	21.4104	53.5252	189.001	205.944	742.086	848.059	401.816	566.034
ENSG00000233184	75.8978	-1.04151	5.43527e-09	1	101025878	101087268		RP11-421L21.3	antisense	125.858	47.5294	128.128	47.6314	137.708	57.516	39.0542	20.3466	54.5728	26.9771	157.743	30.2396	160.771	67.0306	157.046	81.1073	140.653	85.7663	52.9653	75.7335	124.18	32.9386	57.5222	30.4713	43.8558	30.7876	77.0225	33.9843
ENSG00000112419	1120.44	-0.830531	5.56501e-09	6	143536845	143831185	phosphatase and actin regulator 2 [Source:HGNC Symbol;Acc:HGNC:20956]	PHACTR2	protein_coding	1687.31	872.093	1813.15	684.813	1450.48	766.17	685.617	627.354	811.369	441.572	1732.44	1048.88	3331.92	957.58	1839.33	1032.92	1616.78	528.211	959.051	677.995	2374.41	1029.33	891.594	580.006	627.831	503.797	959.533	840.694
ENSG00000149564	162.81	-1.04455	5.67106e-09	11	124752583	124762290	endothelial cell adhesion molecule [Source:HGNC Symbol;Acc:HGNC:17474]	ESAM	protein_coding	198.125	167.793	204.855	92.5666	260.737	44.7347	196.356	135.644	20.8661	14.9084	180.538	70.847	359.987	71.8185	235.98	81.1073	201.554	122.523	251.585	90.1589	407.868	163.664	230.089	120.835	216.971	145.541	165.181	105.853
ENSG00000157514	4922.92	0.904489	5.96041e-09	X	107713221	107777342	TSC22 domain family member 3 [Source:HGNC Symbol;Acc:HGNC:3051]	TSC22D3	protein_coding	3705.91	6646.92	3524.25	5096.56	2033.47	4330.03	4797.15	5015.44	1187.76	3049.83	4175.17	8561.26	4400.23	15301.2	4537.06	11417	1922.74	5501.3	3438.96	5512.32	1164.73	4154.38	4604.51	4410.99	2491.7	4669.92	4992.54	7198.55
ENSG00000257017	2639.97	-1.56689	5.99333e-09	16	72054592	72061055	haptoglobin [Source:HGNC Symbol;Acc:HGNC:5141]	HP	protein_coding	2683.62	352.87	4537.35	787.266	10328.8	2326.2	1301.81	1575.17	3613.04	550.9	2555.8	925.331	5797.07	774.682	1253.9	657.207	3714.97	133.414	4581.5	1923.99	8875.69	1866.18	2329.65	485.44	1420.7	649.339	5460.24	2456.9
ENSG00000153250	2659.39	-0.588709	6.80944e-09	2	160272151	160493794	RNA binding motif single stranded interacting protein 1 [Source:HGNC Symbol;Acc:HGNC:9907]	RBMS1	protein_coding	3584.11	1619.6	3522.02	1917.84	3050.55	2338.28	1172.71	1025.81	1500.75	1340.33	4514.36	2706.01	4219.65	2703.25	3371.14	2690.85	4651.69	2402.82	3395.46	2731.82	3936.3	2437.46	2362.52	1670.67	2335.9	1670.93	3716.57	1873.59
ENSG00000171236	3819.95	-0.619519	6.80944e-09	19	4536409	4540474	leucine rich alpha-2-glycoprotein 1 [Source:HGNC Symbol;Acc:HGNC:29480]	LRG1	protein_coding	3948.7	2744.46	8170.37	3362.95	6210.84	2807.63	2014.54	1904.95	1837.82	1228.17	7168.64	4666.4	4981.56	3574.65	4680.13	3256.22	5782.72	3035.85	4118.05	2876.07	3566.97	2811.1	3170.57	2383.07	3331.89	2518.99	7233.62	3571.7
ENSG00000108582	11792.5	-0.64072	6.80944e-09	17	30378905	30469989	carboxypeptidase D [Source:HGNC Symbol;Acc:HGNC:2301]	CPD	protein_coding	15270.2	11610.9	21726.6	10031.3	22010.9	10755.5	5515.31	5134.98	6900.25	3940.07	17701.8	9550.52	16303.1	9855.41	17961.6	12141	19291.2	12604.9	9849.66	8172.01	12059.4	11360.7	11470.2	5568.9	10823.2	7745.89	16789	8045.37
ENSG00000145287	5785.69	-1.34098	6.80944e-09	4	83090048	83137075	placenta specific 8 [Source:HGNC Symbol;Acc:HGNC:19254]	PLAC8	protein_coding	9354.1	900.178	6709.56	4033.39	5766.96	6962.28	2757.66	1297.94	10283	2116.99	7829.7	8930.18	8378.72	2015.71	4240.24	1896.48	6468.58	582.666	11130.3	3687.5	19358.2	7276.34	5676.89	1429	5460.05	1617.75	12846.1	2992.85
ENSG00000103540	525.708	-0.529996	6.99996e-09	16	19523811	19553408	centriolar coiled-coil protein 110 [Source:HGNC Symbol;Acc:HGNC:24342]	CCP110	protein_coding	512.364	400.399	689.803	425.986	680.851	540.367	403.56	389.129	495.168	282.549	617.294	451.002	714.148	419.42	1031.9	803.916	546.661	332.174	580.727	494.071	742.941	414.821	619.048	366.707	506.65	383.446	552.149	322.572
ENSG00000092841	17586.5	-0.647375	7.0074e-09	12	56158161	56163496	myosin light chain 6 [Source:HGNC Symbol;Acc:HGNC:7587]	MYL6	protein_coding	22352.4	9842.91	25583.1	15210.6	25166.3	16284.1	17337.9	14546.1	16071.7	7519.5	18477.8	13634.6	25067.4	13133.2	16421.6	12605	17800.6	7936.79	23429.6	20729.3	23321.3	15948.5	21637.9	15190.5	16435.5	14009.8	31467.9	15259.5
ENSG00000146376	1055.11	-0.698056	7.15627e-09	6	129576132	129710225	Rho GTPase activating protein 18 [Source:HGNC Symbol;Acc:HGNC:21035]	ARHGAP18	protein_coding	1593.12	905.219	1153.89	610.221	905.937	627.706	1344.11	537.49	579.435	233.565	973.811	390.523	1212.77	1250.6	1720.93	1019.8	942.519	660.264	1042.28	663.57	1755.65	1253.73	1768.12	1295.56	1439.16	1133.54	1613.76	915.905
ENSG00000047365	1571.76	-0.644953	8.17787e-09	4	35948221	36244509	ArfGAP with RhoGAP domain, ankyrin repeat and PH domain 2 [Source:HGNC Symbol;Acc:HGNC:16924]	ARAP2	protein_coding	1356.02	810.881	2314.49	1332.78	2050.24	1296.6	888.482	824.886	1635.58	1153.62	2646.98	1205.26	2771.55	1548.41	2346.64	1152.2	2768.11	1131.3	1997.55	1851.86	2130.34	1252.7	1716.08	1382.77	909.431	706.716	1699.13	1128.73
ENSG00000186431	1921.09	-0.9767	8.17787e-09	19	54874248	54890472	Fc fragment of IgA receptor [Source:HGNC Symbol;Acc:HGNC:3608]	FCAR	protein_coding	2468.44	1284.73	1860.08	1256.39	4338.15	1130.44	854.852	1247.08	1284.87	482.038	3220.51	2548.76	5222.72	1411.47	3596.43	1254.78	3881.73	1615.95	2451.54	1337.96	2133.55	965.513	1744.84	581.057	1619.2	827.067	1919.07	1251.29
ENSG00000204872	23.5558	-1.33127	8.17787e-09	2	73700576	73701340	N-acetyltransferase 8B (putative, gene/pseudogene) [Source:HGNC Symbol;Acc:HGNC:30235]	NAT8B	polymorphic_pseudogene	54.4032	25.205	8.1942	4.49353	32.8542	6.39067	16.2726	7.62998	5.61779	2.83969	24.6188	6.04792	46.6002	2.87274	37.8225	7.15652	42.0508	32.6729	47.2905	18.0318	78.148	26.7626	39.7177	17.8625	21.9279	8.39662	28.7674	8.91392
ENSG00000166527	4728	-0.93766	8.2262e-09	12	8509475	8522366	C-type lectin domain family 4 member D [Source:HGNC Symbol;Acc:HGNC:14554]	CLEC4D	protein_coding	9114.56	2910.82	3317.91	2040.06	11401.1	4589.21	1959.22	1933.78	3854.6	1049.98	6420.04	4066.79	9443.54	4067.8	6724.19	4453.74	10947.7	3320.38	4184.26	4663.02	8686.2	4752.42	5561.85	1892.38	2392.45	1550.58	4994.4	2090.87
ENSG00000059804	24421.6	-0.728604	9.53902e-09	12	7919230	7936275	solute carrier family 2 member 3 [Source:HGNC Symbol;Acc:HGNC:11007]	SLC2A3	protein_coding	29872.2	18506.2	24042.5	20006.1	33479.8	20289	11242.2	10832.9	17339.7	6859.27	28908.9	28604.9	33019.8	15230.3	38816.6	21359.8	53121.8	22174	52326	31844.1	31500.1	22840.9	16488.3	7969.83	22673.5	13307.2	36042.8	15105.2
ENSG00000084110	1038.33	1.22262	1.04935e-08	12	95972662	95996365	histidine ammonia-lyase [Source:HGNC Symbol;Acc:HGNC:4806]	HAL	protein_coding	647.154	2290.77	481.968	1405.57	1045.74	979.903	401.39	672.286	333.054	856.877	453.169	888.18	319.212	2623.77	1090.28	1928.68	593.062	2567.54	204.295	925.031	96.3469	820.377	947.746	1320.78	677.457	1788.48	1145.13	1568.85
ENSG00000189077	671.23	-0.709412	1.06702e-08	7	75986837	75994659	transmembrane protein 120A [Source:HGNC Symbol;Acc:HGNC:21697]	TMEM120A	protein_coding	631.727	422.004	1070.46	526.641	1177.86	516.224	400.305	473.059	474.302	337.923	1220.91	602.2	1388.69	660.73	923.364	536.739	767.065	344.427	716.923	546.363	718.319	546.575	638.222	401.381	729.391	524.789	1039.34	458.51
ENSG00000136960	66.866	-1.67087	1.06702e-08	8	119557086	119673453	ectonucleotide pyrophosphatase/phosphodiesterase 2 [Source:HGNC Symbol;Acc:HGNC:3357]	ENPP2	protein_coding	14.6158	5.041	487.928	9.88576	66.4074	16.3317	18.4422	17.8033	40.9296	38.3358	716.681	25.9196	22.1351	5.74548	63.3117	14.313	50.751	4.08411	20.8078	7.21272	39.6093	8.23465	16.4349	11.5581	51.9345	12.5949	66.8147	18.385
ENSG00000109046	3476.51	-0.616887	1.08832e-08	17	27294076	27315926	WD repeat and SOCS box containing 1 [Source:HGNC Symbol;Acc:HGNC:19221]	WSB1	protein_coding	4198.79	1962.39	4558.96	2608.94	4187.16	2678.4	2422.44	1782.02	2173.28	1928.15	5689.68	3913	5658.43	3553.58	5335.45	2766	6335.18	2587.96	4051.85	3655.04	5413.62	3119.9	2707.65	1841.94	3712.74	2528.78	3171.84	2798.97
ENSG00000082014	429.74	1.2043	1.14455e-08	7	151238764	151277896	SWI/SNF related, matrix associated, actin dependent regulator of chromatin, subfamily d, member 3 [Source:HGNC Symbol;Acc:HGNC:11108]	SMARCD3	protein_coding	260.648	890.817	84.1768	824.113	222.29	851.379	311.348	471.363	475.907	634.671	111.241	533.945	100.19	541.99	104.423	343.513	243.605	544.548	357.516	622.097	179.847	571.279	172.567	336.236	241.207	376.449	837.04	788.325
ENSG00000122986	196.642	0.911368	1.14455e-08	12	110627841	110704950	hydrogen voltage gated channel 1 [Source:HGNC Symbol;Acc:HGNC:28240]	HVCN1	protein_coding	133.166	321.904	146.751	293.877	92.2714	267.698	165.98	264.506	230.329	286.809	65.6502	231.549	54.7553	150.34	147.179	265.984	211.704	281.804	45.3988	131.632	50.3145	178.074	127.371	189.132	365.85	366.653	159.613	279.674
ENSG00000070495	519.579	-0.717621	1.15409e-08	17	76712832	76726799	arginine demethylase and lysine hydroxylase [Source:HGNC Symbol;Acc:HGNC:19355]	JMJD6	protein_coding	572.452	293.818	721.09	393.633	821.355	511.254	271.209	400.15	396.455	204.458	723.976	421.626	907.539	439.529	711.228	422.235	804.766	386.629	677.199	497.677	710.826	384.97	442.373	194.386	592.053	403.038	772.081	470.209
ENSG00000183696	2048.27	-0.817855	1.28043e-08	7	48088628	48108733	uridine phosphorylase 1 [Source:HGNC Symbol;Acc:HGNC:12576]	UPP1	protein_coding	2144.46	1496.46	3567.46	1323.79	4591.2	1504.65	1094.6	785.888	1155.66	606.984	3993.72	1744.39	5771.44	2011.88	2239.75	1900.06	2554.95	1308.28	1895.4	1758.1	2084.3	1916.62	1607.88	755.479	1125.25	765.492	3900.31	1747.13
ENSG00000107438	555.483	-0.943212	1.28172e-08	10	95237572	95291024	PDZ and LIM domain 1 [Source:HGNC Symbol;Acc:HGNC:2067]	PDLIM1	protein_coding	628.479	568.193	651.067	439.467	654.987	220.123	1064.23	446.778	119.579	107.198	776.86	219.453	1213.94	313.129	1014.63	422.235	549.561	336.258	559.919	151.467	975.244	475.551	668.353	383.519	856.342	716.512	631.028	389.427
ENSG00000230257	208.704	0.989248	1.32788e-08	7	102973522	102988856	nuclear factor, erythroid 4 [Source:HGNC Symbol;Acc:HGNC:29902]	NFE4	antisense	109.618	421.283	64.0638	176.146	81.087	114.322	288.567	451.864	66.6109	121.397	80.2391	180.573	228.341	725.846	129.912	130.01	108.752	269.551	100.256	207.366	72.7954	215.13	69.8484	246.923	147.725	337.264	373.977	324.244
ENSG00000105374	173.189	-1.40238	1.3926e-08	19	51371606	51372715	natural killer cell granule protein 7 [Source:HGNC Symbol;Acc:HGNC:7830]	NKG7	protein_coding	107.994	23.7647	348.626	39.543	164.97	45.4448	289.652	135.644	212.673	127.786	616.382	279.068	1091.61	67.0306	113.468	67.987	140.653	14.9751	151.329	52.2922	287.97	44.2613	69.8484	33.6236	57.705	53.1786	115.998	95.8246
ENSG00000119900	5240.89	0.811079	1.42581e-08	6	71288803	71308950	opioid growth factor receptor like 1 [Source:HGNC Symbol;Acc:HGNC:21378]	OGFRL1	protein_coding	3902.41	5637.28	6606.02	9905.53	2255.06	6546.89	2855.29	6025.99	3826.51	6307.66	3739.32	6498.92	2003.81	9026.15	4559.26	6201.13	3617.82	6006.36	3830.53	6608.65	1789.91	4132.77	4485.36	7659.87	4804.52	7443.61	5154.01	5314.37
ENSG00000093072	318.472	1.06127	1.43572e-08	22	17178790	17221989	cat eye syndrome chromosome region, candidate 1 [Source:HGNC Symbol;Acc:HGNC:1839]	CECR1	protein_coding	157.526	392.478	64.0638	197.715	218.795	436.696	326.536	473.059	743.955	1086.89	72.0328	476.057	100.19	287.274	166.913	318.465	178.354	488.732	81.3396	257.855	63.1607	285.125	216.393	259.532	478.952	445.021	193.948	450.153
ENSG00000114302	1423.12	-0.601498	1.47348e-08	3	48744597	48847846	protein kinase cAMP-dependent type II regulatory subunit alpha [Source:HGNC Symbol;Acc:HGNC:9391]	PRKAR2A	protein_coding	1893.56	1191.12	1602.34	1269.87	1499.41	1323.58	836.41	760.455	1231.1	680.816	1693.23	1455.82	2660.87	1190.27	2280.04	1471.86	2074.99	1068.68	1747.86	1159.44	1907.67	1486.35	1327.12	712.399	1513.03	957.215	1893.08	958.804
ENSG00000117586	205.016	-0.796549	1.47348e-08	1	173183734	173207313	tumor necrosis factor superfamily member 4 [Source:HGNC Symbol;Acc:HGNC:11934]	TNFSF4	protein_coding	315.051	185.077	128.128	133.008	295.688	107.221	256.022	94.1031	48.955	33.3664	191.48	66.5271	311.057	193.431	328.892	203.961	195.754	126.607	272.393	137.042	511.709	194.544	419.09	296.308	242.361	180.527	165.181	106.967
ENSG00000048052	154.315	0.938638	1.51101e-08	7	18086949	19002416	histone deacetylase 9 [Source:HGNC Symbol;Acc:HGNC:14065]	HDAC9	protein_coding	102.31	253.49	39.4812	143.793	63.6113	129.944	132.35	165.316	220.699	303.847	61.0911	158.974	50.0952	197.261	112.645	265.984	217.504	273.635	37.8324	91.9621	120.969	127.637	149.284	346.743	135.03	183.326	62.1748	173.821
ENSG00000091592	483.188	0.909506	1.51101e-08	17	5499427	5619424	NLR family pyrin domain containing 1 [Source:HGNC Symbol;Acc:HGNC:14374]	NLRP1	protein_coding	267.144	764.071	181.017	375.659	262.135	411.133	386.202	416.258	355.526	1323.3	506.965	1171.57	287.756	1025.57	415.226	543.896	519.11	664.348	211.861	329.982	53.526	176.016	284.872	464.425	517.037	673.129	285.818	655.73
ENSG00000225611	40.5743	1.33113	1.962e-08	3	42770612	42773635		RP11-70C1.1	antisense	13.8038	23.7647	27.5623	127.616	10.4854	55.3858	33.63	61.8876	12.8407	44.7251	9.11808	48.3833	4.66002	70.8609	18.9113	34.5899	18.8504	29.9501	5.67486	19.835	6.42312	25.7333	16.4349	88.2618	64.6296	131.547	63.1028	67.4115
ENSG00000205846	56.9408	-0.992355	1.962e-08	12	8455926	8478330	C-type lectin domain family 6 member A [Source:HGNC Symbol;Acc:HGNC:14556]	CLEC6A	protein_coding	37.3514	10.082	54.3797	22.4676	169.164	49.7052	44.4783	26.281	88.2795	36.2061	54.7085	50.1113	89.7054	25.8547	55.9116	41.7464	46.4009	17.6978	47.2905	30.654	144.52	79.2585	56.1526	36.7758	42.7017	30.7876	154.973	50.6979
ENSG00000163812	1427.32	-0.671093	2.03648e-08	3	44915257	44976185	zinc finger DHHC-type containing 3 [Source:HGNC Symbol;Acc:HGNC:18470]	ZDHHC3	protein_coding	1517.61	807.28	1895.1	1191.68	2394.86	1432.22	970.93	1251.32	1159.67	668.747	1803.56	1334	2445.35	1034.19	1759.57	1125.96	2063.39	916.202	2234	1785.15	1945.14	1039.62	1462.71	879.466	1308.75	890.042	1726.97	921.476
ENSG00000254420	95.9657	-1.09779	2.18299e-08	11	78324758	78444049		RP11-452H21.1	antisense	181.885	41.0481	131.852	47.6314	158.679	137.044	39.0542	22.0422	57.7829	7.80915	206.98	76.8949	106.016	44.0487	138.957	103.77	136.303	74.8753	58.6402	41.4731	204.469	139.989	98.6094	28.3699	51.9345	8.39662	242.203	100.282
ENSG00000173825	14.7547	1.69079	2.2782e-08	11	65354767	65357613	tigger transposable element derived 3 [Source:HGNC Symbol;Acc:HGNC:18334]	TIGD3	protein_coding	1.62398	15.123	5.95942	17.0754	0.699026	9.94104	13.0181	20.3466	8.02541	64.603	3.64723	28.5116	0	27.7698	5.75561	15.5058	1.45003	12.2523	1.89162	0	0	3.08799	15.0653	24.1669	9.2328	82.5668	1.85596	23.9562
ENSG00000078043	403.631	0.858013	2.36751e-08	18	46803224	46920160	protein inhibitor of activated STAT 2 [Source:HGNC Symbol;Acc:HGNC:17311]	PIAS2	protein_coding	413.302	771.273	349.371	754.912	157.281	304.622	122.587	144.97	176.559	270.481	456.816	788.821	179.411	925.022	300.114	692.99	211.704	422.025	211.861	654.554	285.829	408.645	471.134	588.412	169.653	264.494	342.425	462.41
ENSG00000161217	2268.51	-0.893768	2.36751e-08	3	196214222	196287957	phosphate cytidylyltransferase 1, choline, alpha [Source:HGNC Symbol;Acc:HGNC:8754]	PCYT1A	protein_coding	3407.1	1495.02	3342.49	2119.15	3375.6	2152.24	1016.49	1398.83	1479.89	941.358	3764.86	3315.99	4796.33	1168.25	3306.18	1783.17	3868.68	1557.41	3297.09	1714.82	2765.15	1230.05	2276.23	865.806	2131.62	981.006	2930.57	1036.8
ENSG00000188820	102.73	1.07096	2.43368e-08	6	116461370	116463779	family with sequence similarity 26 member F [Source:HGNC Symbol;Acc:HGNC:33391]	FAM26F	protein_coding	61.7111	79.9358	46.1855	202.209	44.7376	201.661	136.69	134.796	123.591	165.412	27.3542	61.3431	27.9601	158.001	27.1336	60.8305	33.3507	68.0685	26.4827	54.0954	95.2763	190.426	45.196	148.154	110.794	249.1	102.078	193.878
ENSG00000223799	87.1781	-0.93217	2.43368e-08	21	33263873	33266260	IL10RB antisense RNA 1 (head to head) [Source:HGNC Symbol;Acc:HGNC:44303]	IL10RB-AS1	antisense	132.354	62.6524	173.568	76.3899	123.728	86.6291	77.0235	55.9532	60.1906	26.2671	92.0926	65.6631	139.801	20.1092	74.0006	54.8667	100.052	70.7912	130.522	63.1113	152.014	68.9652	83.5441	49.3846	92.328	37.7848	194.876	76.3254
ENSG00000153029	763.034	-0.552895	2.44556e-08	1	181033425	181061938	major histocompatibility complex, class I-related [Source:HGNC Symbol;Acc:HGNC:4975]	MR1	protein_coding	828.228	483.216	946.058	620.107	1157.59	732.087	486.007	392.52	532.085	522.503	837.04	752.533	1010.06	775.64	785.229	608.305	1152.77	555.439	851.228	535.544	1420.58	857.433	803.941	470.73	858.651	619.951	1157.19	612.275
ENSG00000023839	56.8845	0.884142	2.49831e-08	10	99782732	99852192	ATP binding cassette subfamily C member 2 [Source:HGNC Symbol;Acc:HGNC:53]	ABCC2	protein_coding	60.0871	117.383	26.0725	62.9094	30.0581	74.5578	34.7148	38.9977	27.2864	64.603	42.855	72.575	23.3001	95.758	32.0669	51.2884	56.5511	98.0186	34.0491	45.0795	23.5515	69.9945	54.783	87.2111	40.3935	50.3797	64.0307	114.21
ENSG00000158717	424.114	0.681715	2.8744e-08	16	88696495	88706421	ring finger protein 166 [Source:HGNC Symbol;Acc:HGNC:28856]	RNF166	protein_coding	247.656	528.585	330.748	382.848	160.077	283.32	309.179	607.855	375.589	567.938	452.257	653.175	481.147	873.313	466.204	472.331	169.653	447.891	259.152	418.338	164.86	423.055	321.85	421.345	409.706	582.166	434.295	630.66
ENSG00000128513	254.062	-0.534016	2.8744e-08	7	124822386	124929983	protection of telomeres 1 [Source:HGNC Symbol;Acc:HGNC:17284]	POT1	protein_coding	306.119	185.797	318.084	222.879	299.882	237.165	200.695	126.319	309.781	217.946	320.956	194.397	352.997	216.413	304.225	251.671	330.607	181.062	232.669	219.988	372.541	209.984	283.502	255.329	256.21	197.321	324.794	184.407
ENSG00000155287	298.793	-0.846555	2.87746e-08	10	99610522	99620609	solute carrier family 25 member 28 [Source:HGNC Symbol;Acc:HGNC:23472]	SLC25A28	protein_coding	271.204	87.8574	184.742	150.982	423.61	264.148	207.204	152.6	295.335	175.351	409.402	424.218	549.883	224.074	444.826	214.696	600.312	151.112	387.782	277.69	473.17	183.221	304.046	156.56	312.761	193.122	563.285	283.017
ENSG00000242574	211.906	1.06702	2.92077e-08	6	32934629	32941070	major histocompatibility complex, class II, DM beta [Source:HGNC Symbol;Acc:HGNC:4935]	HLA-DMB	protein_coding	124.234	197.319	98.3304	181.538	70.6016	347.937	164.895	206.009	591.473	688.625	57.4439	104.543	38.4452	259.504	120.868	237.358	179.804	341.704	26.4827	135.238	70.6544	279.978	119.153	286.851	227.358	354.058	129.917	293.045
ENSG00000188315	333.709	0.566446	2.92077e-08	3	49268602	49277909	chromosome 3 open reading frame 62 [Source:HGNC Symbol;Acc:HGNC:24771]	C3orf62	protein_coding	281.76	414.082	242.101	372.963	190.834	367.109	256.022	327.241	263.233	437.312	248.924	446.682	343.677	506.56	306.692	555.823	250.855	434.277	221.319	268.674	137.027	271.744	312.263	360.402	388.932	468.811	322.01	346.529
ENSG00000163625	6957.65	-0.635343	2.92077e-08	4	84669610	84966391	WD repeat and FYVE domain containing 3 [Source:HGNC Symbol;Acc:HGNC:20751]	WDFY3	protein_coding	9058.54	5302.41	5842.47	5253.83	10345.6	5698.35	4031.26	3500.47	4844.94	4108.32	11540.8	10638.3	14362.2	7178.02	12172.3	6037.72	13836.2	6809.57	9164.89	4814.49	6635.09	3572.81	5423.52	2797.06	6327.93	3711.31	6322.34	5483.73
ENSG00000148459	177.992	-1.11148	3.58277e-08	10	26697659	26746798	prenyl (decaprenyl) diphosphate synthase, subunit 1 [Source:HGNC Symbol;Acc:HGNC:17759]	PDSS1	protein_coding	197.313	83.5366	455.896	106.047	304.076	137.044	74.8538	75.452	211.871	77.3816	437.668	60.4792	236.496	98.6307	128.268	103.77	430.659	108.91	191.053	147.861	302.957	92.6398	161.61	128.19	83.0952	62.9747	370.265	114.767
ENSG00000196730	363.633	0.584143	3.91077e-08	9	87497228	87708633	death associated protein kinase 1 [Source:HGNC Symbol;Acc:HGNC:2674]	DAPK1	protein_coding	214.365	356.471	233.162	342.407	318.057	523.325	245.173	480.689	295.335	466.419	543.438	1288.21	146.791	189.601	245.024	280.297	168.203	315.838	338.6	441.779	185.2	283.066	216.393	245.872	444.329	575.169	346.137	452.381
ENSG00000163534	429.965	-1.12421	3.91077e-08	1	157794403	157820105	Fc receptor like 1 [Source:HGNC Symbol;Acc:HGNC:18509]	FCRL1	protein_coding	677.198	187.237	227.203	292.079	760.54	247.106	98.7202	99.1898	385.22	115.717	612.735	457.914	1126.56	234.607	855.119	379.296	2167.79	389.352	567.486	429.157	162.719	52.4959	504.004	128.19	229.666	100.759	349.849	201.12
ENSG00000165682	508.901	-1.21889	4.07929e-08	12	9985642	10013424	C-type lectin domain family 1 member B [Source:HGNC Symbol;Acc:HGNC:24356]	CLEC1B	protein_coding	802.244	308.221	463.345	151.881	522.172	51.8354	841.834	128.862	73.8338	61.0534	688.415	111.454	832.979	326.535	587.894	143.13	342.207	273.635	690.441	178.515	1947.28	1114.77	931.311	436.055	617.444	568.172	606.9	446.81
ENSG00000165175	704.156	0.819355	4.0897e-08	X	38801432	38806537	MID1 interacting protein 1 [Source:HGNC Symbol;Acc:HGNC:20715]	MID1IP1	protein_coding	331.291	761.191	522.939	1302.22	320.853	795.283	527.231	748.586	723.892	814.991	371.106	952.115	294.746	1150.05	403.715	652.436	284.206	720.165	654.5	793.399	389.67	673.183	628.635	894.176	890.965	1195.12	844.463	1075.24
ENSG00000270069	18.615	-1.65463	4.11548e-08	X	45745211	45770274	MIR222 host gene [Source:HGNC Symbol;Acc:HGNC:49555]	MIR222HG	lincRNA	11.3678	2.16043	15.6435	0.898705	23.0678	4.26045	11.9332	2.54333	11.2356	11.3588	57.4439	11.2318	78.0554	9.5758	63.3117	1.19275	69.6014	5.44548	13.2413	7.21272	59.9492	8.23465	15.0653	4.20294	9.2328	2.79887	3.71193	7.24256
ENSG00000007516	24.3379	1.50948	4.37232e-08	16	1333601	1349441	BAI1 associated protein 3 [Source:HGNC Symbol;Acc:HGNC:948]	BAIAP3	protein_coding	5.68392	90.0178	5.95942	13.4806	8.38831	11.3612	10.8484	26.281	11.2356	40.4656	5.47085	66.5271	2.33001	42.1335	19.7335	67.987	8.70018	16.3364	9.45809	19.835	12.8462	21.616	20.5436	35.725	10.3869	32.1871	4.63991	61.2832
ENSG00000196922	323.9	-0.630626	4.5213e-08	8	144973589	145002895	zinc finger protein 252, pseudogene [Source:HGNC Symbol;Acc:HGNC:13046]	ZNF252P	transcribed_unitary_pseudogene	367.019	153.39	390.342	374.76	372.581	271.248	240.834	234.834	483.932	282.549	348.311	202.173	524.253	263.334	655.317	343.513	394.408	216.458	374.54	270.477	413.221	228.512	341.024	252.177	276.984	212.714	364.697	215.605
ENSG00000163050	518.467	1.12763	4.89951e-08	1	226897536	226987545	coenzyme Q8A [Source:HGNC Symbol;Acc:HGNC:16812]	COQ8A	protein_coding	461.209	888.656	198.896	883.427	89.4753	721.436	291.821	490.014	484.735	561.549	266.248	1115.41	89.7054	583.166	203.913	401.958	195.754	660.264	472.905	818.643	188.412	476.58	357.459	633.594	625.522	827.067	663.507	865.764
ENSG00000140859	200.564	-0.770545	4.97454e-08	16	57758217	57863053	kinesin family member C3 [Source:HGNC Symbol;Acc:HGNC:6326]	KIFC3	protein_coding	117.738	100.1	430.568	265.118	186.64	113.612	222.392	96.6464	147.668	117.137	433.109	281.66	181.741	131.188	259.002	78.7218	169.653	63.9844	191.053	63.1113	215.175	134.842	183.523	168.118	444.329	225.309	378.617	215.048
ENSG00000133138	38.3155	-1.24829	5.0346e-08	X	106802680	106876145	TBC1 domain family member 8B [Source:HGNC Symbol;Acc:HGNC:24715]	TBC1D8B	protein_coding	37.3514	11.5223	78.2174	38.6443	59.4172	26.2728	20.6119	15.26	74.6363	34.0763	46.5022	43.1994	119.996	5.74548	46.0448	13.1203	82.6517	21.7819	49.1821	14.4254	67.4428	20.5866	45.196	18.9132	32.3148	12.5949	25.9835	11.1424
ENSG00000124772	73.6603	-1.34933	5.06185e-08	6	36740775	36840002	copine 5 [Source:HGNC Symbol;Acc:HGNC:2318]	CPNE5	protein_coding	64.147	29.5259	72.258	10.7845	141.203	23.4325	58.5812	58.4965	18.4584	10.6488	264.424	82.0789	450.857	35.4305	161.157	59.6377	171.103	23.1433	49.1821	21.6381	57.8081	12.352	50.6743	26.2684	27.6984	18.1927	31.5514	31.7558
ENSG00000170275	328.278	0.856094	5.17508e-08	3	33113979	33147773	cartilage associated protein [Source:HGNC Symbol;Acc:HGNC:2379]	CRTAP	protein_coding	194.877	596.998	179.528	284.89	171.96	517.644	350.403	342.501	508.008	553.74	158.655	331.771	195.721	405.056	217.891	407.922	175.454	566.33	166.462	400.306	137.027	367.471	202.697	308.916	364.696	438.024	257.979	388.87
ENSG00000277443	2075.07	-0.980076	5.17508e-08	6	113857362	113863471	myristoylated alanine rich protein kinase C substrate [Source:HGNC Symbol;Acc:HGNC:6759]	MARCKS	protein_coding	1395.81	1078.77	2435.91	941.843	6096.2	1329.97	1655.46	2071.96	1835.41	1250.88	3952.69	1962.12	4060.04	1266.88	3944.23	1007.88	2747.81	775.981	3172.24	1761.71	2233.11	1240.34	1638.01	1216.75	2775.61	1035.58	1913.5	1305.33
ENSG00000156265	619.92	-0.850535	5.18343e-08	21	29077471	29175889	MAP3K7 C-terminal like [Source:HGNC Symbol;Acc:HGNC:16457]	MAP3K7CL	protein_coding	1917.1	800.799	225.713	263.321	975.141	391.961	542.419	193.293	212.673	129.206	198.774	64.7991	1035.69	413.675	1284.32	527.197	1512.38	756.922	141.871	75.7335	1028.77	482.756	1176.47	995.047	752.473	775.288	295.098	188.864
ENSG00000143595	76.1093	-0.987995	5.18343e-08	1	154321090	154325325	aquaporin 10 [Source:HGNC Symbol;Acc:HGNC:16029]	AQP10	protein_coding	34.1035	25.205	19.3681	15.278	85.2811	19.8821	74.8538	34.7588	15.2483	4.25954	76.5919	40.6074	76.8904	35.4305	224.469	41.7464	66.7013	36.757	121.064	68.5208	135.956	123.52	232.828	98.7692	151.187	75.5696	129.917	66.2973
ENSG00000165168	16813.5	-0.828631	5.37731e-08	X	37780011	37813461	cytochrome b-245 beta chain [Source:HGNC Symbol;Acc:HGNC:2578]	CYBB	protein_coding	13907.7	5284.41	28074.1	10413.3	25686.4	16294.1	16178.2	16536.7	21943.9	14636.5	20916.9	10091.4	33291.2	7670.22	13723	9588.55	17100.2	7912.28	16958.4	14059.4	37797.9	14706.1	11242.8	7817.48	23272.4	14331.6	24948.8	16394.4
ENSG00000102897	601.811	-0.687447	5.54139e-08	16	20899868	20925006	LYR motif containing 1 [Source:HGNC Symbol;Acc:HGNC:25074]	LYRM1	protein_coding	767.329	365.112	911.047	479.909	738.87	515.514	320.027	229.747	376.392	234.984	846.158	319.676	1003.07	671.264	684.917	640.509	917.868	475.118	641.259	573.411	1010.57	551.722	656.027	510.658	691.306	517.792	877.871	322.572
ENSG00000069956	700.921	-0.659819	5.63165e-08	15	51952106	52067372	mitogen-activated protein kinase 6 [Source:HGNC Symbol;Acc:HGNC:6879]	MAPK6	protein_coding	870.451	505.54	799.307	610.221	729.084	665.34	576.049	405.237	651.663	253.442	638.266	736.118	914.529	514.22	1192.23	617.847	610.462	279.081	1420.61	793.399	993.443	626.863	831.332	503.303	686.69	449.219	1131.21	620.632
ENSG00000159921	155.761	-0.784538	5.65136e-08	9	36214441	36277056	glucosamine (UDP-N-acetyl)-2-epimerase/N-acetylmannosamine kinase [Source:HGNC Symbol;Acc:HGNC:23657]	GNE	protein_coding	194.877	111.622	347.881	144.692	238.368	127.813	146.453	116.993	180.572	102.939	276.278	136.51	320.377	86.1822	245.847	97.8058	239.255	125.246	100.256	82.9462	139.168	78.2292	102.718	91.414	123.489	106.357	174.461	122.566
ENSG00000136870	365.721	-0.547348	6.59914e-08	9	101398873	101410660	zinc finger protein 189 [Source:HGNC Symbol;Acc:HGNC:12980]	ZNF189	protein_coding	450.653	231.886	580.299	327.129	410.328	398.352	221.307	211.096	475.104	296.748	529.761	353.371	441.537	323.662	585.427	373.332	439.359	243.685	393.457	304.737	486.016	265.568	286.241	216.452	335.843	264.494	489.046	305.302
ENSG00000172893	194.951	-1.24268	6.69676e-08	11	71428193	71452868	7-dehydrocholesterol reductase [Source:HGNC Symbol;Acc:HGNC:2860]	DHCR7	protein_coding	179.449	105.141	262.215	99.7563	572.502	75.2679	104.144	162.773	184.584	51.8244	245.276	127.006	420.567	40.2184	198.98	63.216	340.757	80.3208	495.604	207.366	501.004	115.285	189.001	67.2471	113.102	71.3713	206.94	177.721
ENSG00000077380	375.231	-0.626408	6.97217e-08	2	171687409	171748420	dynein cytoplasmic 1 intermediate chain 2 [Source:HGNC Symbol;Acc:HGNC:2964]	DYNC1I2	protein_coding	384.882	255.651	554.971	258.827	524.968	290.42	458.886	295.026	447.818	312.366	490.553	366.331	872.589	305.468	481.826	401.958	421.959	279.081	370.757	308.344	445.337	282.037	295.828	178.625	287.371	268.692	415.736	250.147
ENSG00000164674	500.787	-1.00931	7.20186e-08	6	158650014	158764876	synaptotagmin like 3 [Source:HGNC Symbol;Acc:HGNC:15587]	SYTL3	protein_coding	482.321	229.726	727.049	173.45	904.539	269.118	171.404	233.986	231.132	193.809	1049.49	249.693	1262.87	337.068	971.875	477.102	1209.32	407.05	563.702	434.566	475.311	179.104	506.743	296.308	460.486	321.871	754.449	448.482
ENSG00000125746	248.049	-0.828167	7.23215e-08	19	45606994	45645629	echinoderm microtubule associated protein like 2 [Source:HGNC Symbol;Acc:HGNC:18035]	EML2	protein_coding	309.367	190.838	374.699	218.385	292.892	208.052	146.453	142.426	329.042	139.855	286.308	226.365	469.497	88.0974	157.046	79.9145	348.007	147.028	274.285	167.696	511.709	244.981	234.197	153.407	320.84	197.321	462.135	224.519
ENSG00000104447	1270.16	-0.77192	7.74643e-08	8	115408496	115809673	transcriptional repressor GATA binding 1 [Source:HGNC Symbol;Acc:HGNC:12340]	TRPS1	protein_coding	1590.68	694.218	940.099	840.289	1997.82	1286.66	803.865	463.733	1502.36	770.976	2008.71	1651.94	2279.92	1170.16	1651.04	1160.55	3239.37	714.719	1655.17	1155.84	1892.68	729.796	916.246	618.883	1035.23	684.325	1288.04	821.195
ENSG00000151327	426.73	-0.722523	7.76094e-08	14	35044907	35113130	family with sequence similarity 177 member A1 [Source:HGNC Symbol;Acc:HGNC:19829]	FAM177A1	protein_coding	620.359	376.635	561.675	406.215	981.432	386.991	205.034	280.614	344.29	188.839	449.521	260.924	711.818	288.232	616.672	399.573	593.062	268.19	446.422	293.918	586.645	260.421	428.677	312.069	493.955	351.259	541.941	293.045
ENSG00000082212	2024.34	-0.508	8.20159e-08	18	50879049	50954257	malic enzyme 2 [Source:HGNC Symbol;Acc:HGNC:6984]	ME2	protein_coding	2568.32	1561.27	2457.52	1702.15	2527.68	1851.87	1203.08	1261.49	2251.13	1260.82	1982.27	1556.04	2347.49	1517.76	2742.96	1977.59	3268.37	1854.19	2551.79	2073.66	3664.39	2038.08	1590.08	1438.46	2204.33	1669.53	2257.78	1301.43
ENSG00000218739	389.255	-0.717406	8.47986e-08	2	37196488	37216193	CEBPZ opposite strand [Source:HGNC Symbol;Acc:HGNC:49288]	CEBPZOS	protein_coding	453.089	252.05	519.215	274.105	531.26	338.706	202.865	241.616	447.015	156.893	339.193	345.595	608.133	344.729	716.984	418.657	720.665	330.813	578.835	384.077	560.953	309.829	421.829	208.046	273.522	198.72	489.974	231.762
ENSG00000125952	1241.22	-0.371194	8.89384e-08	14	65006174	65102695	MYC associated factor X [Source:HGNC Symbol;Acc:HGNC:6913]	MAX	protein_coding	1187.94	884.335	963.936	789.962	1010.79	742.738	1434.16	1202.99	751.178	761.037	1218.18	934.835	1916.43	1391.36	1981.57	1407.45	1663.18	1230.68	1863.24	1220.75	1542.62	1054.04	1822.91	1320.78	1337.6	1088.76	1070.89	959.918
ENSG00000067334	905.116	-0.538428	8.89384e-08	1	93866283	93879918	deoxynucleotidyltransferase terminal interacting protein 2 [Source:HGNC Symbol;Acc:HGNC:24013]	DNTTIP2	protein_coding	915.922	740.307	1265.63	836.694	1509.2	859.9	686.702	656.178	759.204	472.809	1047.67	518.393	1288.5	790.003	1579.5	895.758	1432.63	878.083	853.12	687.011	972.033	592.895	946.377	886.821	841.339	748.699	1032.84	649.045
ENSG00000157680	28.775	-1.32595	8.89384e-08	7	137381037	137847092	diacylglycerol kinase iota [Source:HGNC Symbol;Acc:HGNC:2855]	DGKI	protein_coding	18.6757	13.6827	34.2667	7.18964	42.6406	2.8403	19.5271	6.78221	11.2356	3.54961	22.7952	2.59196	31.4552	14.3637	106.068	23.8551	75.4015	9.52959	20.8078	9.01589	99.5584	51.4666	36.9785	14.7103	41.5476	27.9887	34.3353	22.8419
ENSG00000092200	24.3135	1.39016	9.26862e-08	14	21287939	21351301	retinitis pigmentosa GTPase regulator interacting protein 1 [Source:HGNC Symbol;Acc:HGNC:13436]	RPGRIP1	protein_coding	11.3678	32.4064	17.1333	52.1249	4.19415	26.2728	14.1029	27.9766	17.6559	42.5954	6.38266	24.1917	3.49502	48.8366	44.4004	51.2884	2.90006	51.732	0	7.21272	3.21156	25.7333	19.1741	55.689	20.7738	22.391	10.2078	37.327
ENSG00000104918	1659.4	-1.69276	9.44902e-08	19	7669044	7670454	resistin [Source:HGNC Symbol;Acc:HGNC:20389]	RETN	protein_coding	678.822	83.5366	4692.3	264.219	4009.61	342.256	3683.02	1924.45	1824.98	352.122	3748.44	730.934	8333.29	144.595	650.383	133.588	1729.88	55.8162	1579.5	869.132	4962.93	251.157	331.437	171.27	560.893	292.482	2435.95	1626.23
ENSG00000270956	57.9108	-0.910516	9.7903e-08	2	178541125	178541799		RP11-65L3.4	antisense	62.5231	27.3654	45.4406	17.9741	120.931	34.7937	56.4116	41.541	40.9296	39.0458	94.828	47.5193	128.151	59.37	113.468	63.216	98.602	28.5888	75.6647	46.8827	85.6417	31.9093	65.7396	29.4206	23.082	13.9944	67.7427	60.7261
ENSG00000113070	28.2733	-1.65203	1.16728e-07	5	140332843	140346631	heparin binding EGF like growth factor [Source:HGNC Symbol;Acc:HGNC:3059]	HBEGF	protein_coding	9.74386	9.36186	201.13	8.98705	99.2617	5.6806	5.42419	11.0211	4.0127	1.41985	151.36	19.8717	34.9502	0.95758	18.9113	7.15652	17.4004	5.44548	15.1329	3.60636	82.4301	5.14666	9.58703	7.35515	13.8492	6.99719	31.5514	3.89984
ENSG00000155903	2539.85	-0.533586	1.24355e-07	3	141487047	141615342	RAS p21 protein activator 2 [Source:HGNC Symbol;Acc:HGNC:9872]	RASA2	protein_coding	2744.52	2066.81	2794.97	2139.82	4383.59	2079.81	1303.97	1290.31	1390.8	1010.93	2482.85	1585.42	3987.81	2842.1	4791.13	2705.17	4428.39	2739.08	3075.77	2382	2921.45	1975.29	2598.08	2120.39	2155.86	1781.48	3643.26	1694.76
ENSG00000247774	179.522	-0.785191	1.24355e-07	12	47205898	47216456	PCED1B antisense RNA 1 [Source:HGNC Symbol;Acc:HGNC:44166]	PCED1B-AS1	processed_transcript	139.662	63.3726	219.754	99.7563	128.621	102.251	211.543	175.49	186.992	152.633	330.075	107.998	410.082	164.704	232.691	100.191	285.656	144.305	232.669	140.648	234.444	94.6985	150.653	163.915	282.755	162.335	182.812	125.909
ENSG00000171174	24.6271	-0.969544	1.25273e-07	2	27781364	27891098	ribokinase [Source:HGNC Symbol;Acc:HGNC:30325]	RBKS	protein_coding	35.7275	15.8431	48.4203	26.9612	59.4172	22.7224	18.4422	17.8033	33.7067	14.9084	31.9133	17.2798	30.2901	11.491	31.2447	13.1203	39.1508	16.3364	22.6994	16.2286	34.2567	20.5866	20.5436	10.5074	21.9279	4.19831	37.1193	16.7136
ENSG00000128294	2211.39	-0.517941	1.2976e-07	22	26521983	26596717	tyrosylprotein sulfotransferase 2 [Source:HGNC Symbol;Acc:HGNC:12021]	TPST2	protein_coding	2988.12	2041.6	3100.39	1987.94	2613.66	2289.28	1321.33	1460.72	1863.5	985.373	2744.54	2238.59	3529.97	2084.65	2374.6	1450.39	2570.9	1712.6	3124.95	2244.96	2842.23	2068.96	2363.89	1840.89	2229.72	1442.82	2909.22	1493.08
ENSG00000168404	1340.84	-0.546286	1.3067e-07	16	74671855	74700960	mixed lineage kinase domain like [Source:HGNC Symbol;Acc:HGNC:26617]	MLKL	protein_coding	1688.93	857.69	2175.93	1357.94	1783.21	1184.4	688.872	646.853	705.433	665.908	1988.65	1299.44	1516.84	1114.62	1090.28	961.36	1995.24	997.884	1488.7	1303.7	2675.23	1447.24	1292.88	750.225	1468.02	976.807	2096.31	1324.83
ENSG00000169764	2241.53	-0.54632	1.31301e-07	2	63840940	63891562	UDP-glucose pyrophosphorylase 2 [Source:HGNC Symbol;Acc:HGNC:12527]	UGP2	protein_coding	2387.24	1840.68	3195.74	2331.24	3910.35	2116.73	1704.28	1370.01	1570.57	1064.88	2468.26	1594.92	3391.33	1630.76	2545.62	2267.43	3032.01	1724.86	2655.83	2508.22	3285.43	1939.26	2151.6	1515.16	1877.72	1648.54	3369.5	1664.67
ENSG00000196878	46.3123	-1.4606	1.42822e-07	1	209614870	209652466	laminin subunit beta 3 [Source:HGNC Symbol;Acc:HGNC:6490]	LAMB3	protein_coding	33.2915	11.5223	124.403	26.0624	76.1938	23.4325	13.0181	51.7143	19.261	4.96946	108.505	60.4792	99.0255	15.3213	69.0673	17.8913	59.4512	5.44548	54.8569	21.6381	67.4428	19.5573	50.6743	14.7103	62.3214	9.79606	168.893	7.79968
ENSG00000073737	2193.37	-1.12363	1.46668e-07	2	169064789	169096167	dehydrogenase/reductase 9 [Source:HGNC Symbol;Acc:HGNC:16888]	DHRS9	protein_coding	3934.08	871.373	3767.1	1366.03	6113.68	1358.37	566.285	650.244	822.604	509.725	4015.6	1318.45	5353.2	990.138	2691.98	1606.64	3304.62	993.8	1732.72	1503.85	5984.21	2608.33	2076.28	422.396	857.496	1224.51	3266.5	1504.22
ENSG00000143341	11.7463	-1.5124	1.46668e-07	1	185734551	186190949	hemicentin 1 [Source:HGNC Symbol;Acc:HGNC:19194]	HMCN1	protein_coding	28.4196	8.64171	51.4	6.29094	3.49513	2.8403	3.25451	1.69555	4.81525	0	24.6188	4.31994	23.3001	2.87274	17.2668	3.57826	39.1508	10.891	13.2413	1.80318	11.7757	13.3813	19.1741	6.30442	10.3869	2.79887	12.0638	1.11424
ENSG00000164466	944.751	-1.56502	1.46668e-07	5	175477062	175529742	sideroflexin 1 [Source:HGNC Symbol;Acc:HGNC:16085]	SFXN1	protein_coding	3070.13	352.87	1518.91	276.801	3181.97	266.278	257.107	427.279	357.933	198.778	1399.63	266.108	3860.83	153.213	804.14	280.297	2099.64	291.333	968.509	742.91	2735.18	364.383	794.354	184.93	218.125	152.539	869.519	359.342
ENSG00000187808	98.069	0.949039	1.49403e-07	X	119758613	119760164	sosondowah ankyrin repeat domain family member D [Source:HGNC Symbol;Acc:HGNC:32960]	SOWAHD	protein_coding	55.2152	84.2567	57.3594	149.185	25.864	124.263	108.484	144.97	117.171	123.527	32.8251	129.598	45.4352	105.334	26.3113	60.8305	31.9006	95.2959	54.8569	120.813	47.1029	142.048	106.827	167.067	135.03	177.729	115.07	161.565
ENSG00000131979	746.589	-0.780486	1.50929e-07	14	54842008	54902852	GTP cyclohydrolase 1 [Source:HGNC Symbol;Acc:HGNC:4193]	GCH1	protein_coding	463.645	280.136	1137.5	1120.69	1194.63	591.492	698.635	383.195	838.655	482.748	520.642	424.218	867.929	412.717	563.227	310.116	1265.88	291.333	998.775	421.944	2021.14	1256.81	512.221	535.875	1189.88	643.741	994.796	481.909
ENSG00000168288	2267.79	-0.558842	1.55234e-07	2	149569634	149587816	methylmalonic aciduria and homocystinuria, cblD type [Source:HGNC Symbol;Acc:HGNC:25221]	MMADHC	protein_coding	3156.2	1592.96	2361.42	1826.17	3558.04	2172.12	1290.96	1392.9	1404.45	675.847	2074.36	1451.5	3623.17	2357.56	2550.56	1983.55	3206.01	1515.2	3236.56	2733.62	3755.39	2590.83	2762.43	1976.43	1936.58	1475.01	3048.42	1790.03
ENSG00000168615	1737.28	-0.693969	1.62558e-07	8	38996869	39105144	ADAM metallopeptidase domain 9 [Source:HGNC Symbol;Acc:HGNC:216]	ADAM9	protein_coding	2151.77	1577.11	2489.55	1539.48	2354.32	1808.56	958.996	922.38	1422.9	486.297	1809.03	1091.22	2771.55	1354.02	2705.13	1722.34	2904.41	1347.76	2131.85	2246.76	2662.38	1547.09	1692.8	1116.93	1516.49	880.246	2486.99	945.433
ENSG00000143924	1725.2	-0.808365	1.62558e-07	2	42169350	42332548	echinoderm microtubule associated protein like 4 [Source:HGNC Symbol;Acc:HGNC:1316]	EML4	protein_coding	1196.06	679.815	3934.71	1285.15	2339.64	1436.48	1135.83	1011.4	1273.63	1297.03	3563.35	1599.24	3547.44	1294.65	2094.22	1068.71	2807.26	1010.14	1496.27	1136	2721.26	921.252	1069.64	979.286	1808.48	1370.05	2827.56	1401.16
ENSG00000173611	94.733	-0.936672	1.62558e-07	9	124942608	125143506	suppressor of cancer cell invasion [Source:HGNC Symbol;Acc:HGNC:26709]	SCAI	protein_coding	211.929	65.533	105.78	77.2886	65.7084	45.4448	36.8845	27.9766	104.33	60.3434	231.599	145.15	276.106	59.37	163.624	63.216	146.453	65.3457	73.7731	63.1113	127.392	36.0266	72.5875	66.1964	56.5509	29.3882	128.061	47.3552
ENSG00000001561	396.06	-1.17803	1.62558e-07	6	46129993	46146699	ectonucleotide pyrophosphatase/phosphodiesterase 4 (putative) [Source:HGNC Symbol;Acc:HGNC:3359]	ENPP4	protein_coding	695.062	146.189	600.412	190.525	1304.38	225.094	348.233	374.717	330.647	168.962	495.112	176.254	583.668	184.813	461.271	215.888	1197.72	147.028	393.457	257.855	968.821	163.664	334.176	247.974	126.951	96.5612	326.65	327.587
ENSG00000146416	247.766	-0.774997	1.62588e-07	6	143060496	143340304	androgen induced 1 [Source:HGNC Symbol;Acc:HGNC:21607]	AIG1	protein_coding	275.264	239.087	263.704	154.577	383.765	117.162	227.816	161.925	162.916	124.236	284.484	193.533	362.317	137.892	312.447	134.781	455.309	160.642	408.59	155.073	486.016	325.269	325.959	223.807	246.977	215.513	235.707	162.679
ENSG00000204977	396.858	-0.634981	1.74367e-07	13	49995888	50020481	tripartite motif containing 13 [Source:HGNC Symbol;Acc:HGNC:9976]	TRIM13	protein_coding	413.302	246.289	662.241	355.887	754.249	264.148	326.536	199.227	277.679	285.389	408.49	224.637	450.857	338.026	356.848	220.659	600.312	288.61	429.397	311.95	838.218	500.255	494.417	341.489	484.722	393.242	350.777	294.159
ENSG00000041353	1778.26	-0.842342	1.82029e-07	18	54717860	54895516	RAB27B, member RAS oncogene family [Source:HGNC Symbol;Acc:HGNC:9767]	RAB27B	protein_coding	2547.21	1693.06	1271.59	718.065	2006.2	453.028	1573.01	777.41	195.017	130.626	1324.86	407.802	1908.28	2076.03	3767.45	1839.23	2159.09	972.018	2496.94	856.51	4148.27	2707.14	4003.27	1997.45	2338.21	2034.78	1932.99	1455.75
ENSG00000171657	36.7321	1.4123	1.85825e-07	X	41724155	41730135	G protein-coupled receptor 82 [Source:HGNC Symbol;Acc:HGNC:4533]	GPR82	protein_coding	9.74386	19.4439	31.287	123.123	13.2815	107.931	15.1877	50.8665	4.81525	9.229	20.0598	119.23	6.99003	100.546	13.9779	90.6493	2.90006	8.16822	5.67486	46.8827	6.42312	17.4986	12.3262	38.8772	25.3902	16.7932	59.3908	51.8122
ENSG00000121964	1171.46	-0.585007	1.86919e-07	2	143938068	144332568	glycosyltransferase like domain containing 1 [Source:HGNC Symbol;Acc:HGNC:20887]	GTDC1	protein_coding	1686.5	872.813	1585.95	956.222	1866.4	847.829	755.047	640.918	520.849	381.229	1540.96	696.374	1886.14	1075.36	1947.86	1270.28	1851.69	1010.14	1216.31	1213.54	1554.4	1199.17	1347.66	1040.23	933.667	799.079	1212.87	891.392
ENSG00000167220	290.292	-0.625668	1.90533e-07	18	47107403	47150520	haloacid dehalogenase like hydrolase domain containing 2 [Source:HGNC Symbol;Acc:HGNC:25364]	HDHD2	protein_coding	432.79	282.296	485.693	310.053	359.998	242.845	195.271	165.316	370.774	270.481	334.634	215.133	434.547	158.001	263.113	254.057	417.608	171.533	308.334	229.004	439.984	252.186	339.655	205.944	252.748	207.117	339.641	189.421
ENSG00000163659	1678.05	-0.875748	1.90533e-07	3	156673235	156706770	TCDD inducible poly(ADP-ribose) polymerase [Source:HGNC Symbol;Acc:HGNC:23696]	TIPARP	protein_coding	1975.57	714.382	2193.81	1503.53	3170.08	1623.23	902.585	532.403	1062.56	745.419	1986.83	2092.58	2158.76	1266.88	2402.55	1622.15	4882.25	731.056	2714.47	1496.64	2221.33	819.348	1629.79	847.944	1195.65	793.481	2555.66	1144.32
ENSG00000136026	3954.11	-0.844482	1.96323e-07	12	106237877	106304279	cytoskeleton associated protein 4 [Source:HGNC Symbol;Acc:HGNC:16991]	CKAP4	protein_coding	5106.59	2931.7	4422.64	2667.36	5097.99	3059	2872.65	3327.52	4381.07	1201.9	4647.49	5183.06	8487.07	2469.6	5239.25	3709.47	5310.01	1814.71	5894.28	3179	6915.56	3079.76	3981.36	1749.48	3689.66	2134.14	5424.05	2738.8
ENSG00000173692	1167.22	-0.599786	2.35128e-07	2	231056864	231172827	proteasome 26S subunit, non-ATPase 1 [Source:HGNC Symbol;Acc:HGNC:9554]	PSMD1	protein_coding	1431.53	853.369	2035.89	922.97	1398.75	1160.97	1057.72	936.792	1290.49	622.602	1468.92	751.669	1691.59	786.173	1336.94	1052.01	1148.42	716.08	1144.43	1126.99	1957.98	1131.24	1157.29	984.54	1397.62	908.235	1288.97	922.034
ENSG00000124491	9826.56	-0.895341	2.35128e-07	6	6144085	6321013	coagulation factor XIII A chain [Source:HGNC Symbol;Acc:HGNC:3531]	F13A1	protein_coding	13037.3	8738.21	7744.27	5332.02	6450.61	3014.98	15282.1	4236.33	9002.1	5386.18	11708.5	1654.54	22260.9	13049.9	13962.3	5893.4	8743.68	6587.67	8209.63	3159.17	12836.6	6290.24	18756.3	11678.9	18898.4	14901.2	10347.9	7980.19
ENSG00000144677	365.53	-0.911999	2.40674e-07	3	37861960	37984469	CTD small phosphatase like [Source:HGNC Symbol;Acc:HGNC:16890]	CTDSPL	protein_coding	380.01	241.968	236.887	106.946	322.251	82.3686	866.785	239.073	97.1074	82.3511	383.871	106.271	750.264	396.438	774.54	280.297	316.106	182.424	353.733	111.797	643.383	368.501	693.005	484.389	495.109	503.797	378.617	356.557
ENSG00000183723	182.89	-0.794743	2.41121e-07	16	66614750	66696707	CKLF like MARVEL transmembrane domain containing 4 [Source:HGNC Symbol;Acc:HGNC:19175]	CMTM4	protein_coding	394.626	166.353	179.528	150.982	137.708	147.695	96.5506	77.9954	209.463	98.6793	403.931	303.26	365.812	109.164	332.181	197.997	208.804	87.1277	138.088	88.3558	280.476	93.6692	186.262	89.3126	141.954	88.1646	220.86	125.909
ENSG00000168010	1717.42	0.786114	2.46526e-07	11	72814308	72843674	autophagy related 16 like 2 [Source:HGNC Symbol;Acc:HGNC:25464]	ATG16L2	protein_coding	1751.46	2319.58	752.377	1588.91	659.181	1658.02	1029.51	1373.4	1410.06	3438.87	1367.71	2495.2	902.879	2853.59	1416.7	1598.29	1191.92	2425.96	960.942	1855.47	525.626	1639.73	1896.86	1687.48	2115.47	2595.96	1726.97	2849.67
ENSG00000101082	277.757	-1.05049	2.64636e-07	20	36612318	36646216	Src like adaptor 2 [Source:HGNC Symbol;Acc:HGNC:17329]	SLA2	protein_coding	357.275	336.307	291.267	151.881	348.115	103.671	373.184	150.904	56.9804	64.603	301.808	61.3431	544.058	146.51	424.27	65.6015	475.61	230.071	416.156	131.632	848.923	335.562	406.764	209.096	358.925	244.902	170.749	171.036
ENSG00000101367	2816.71	-0.568509	2.68151e-07	20	32819893	32850405	microtubule associated protein RP/EB family member 1 [Source:HGNC Symbol;Acc:HGNC:6890]	MAPRE1	protein_coding	4069.68	2239.64	3511.59	2670.95	3833.46	2780.65	1573.01	1481.91	2071.36	1265.08	3799.5	2866.71	4743.9	2324.05	3904.77	3344.48	3229.22	1572.38	2983.08	2618.22	3395.69	2369.52	3160.98	1753.68	2594.42	2141.14	4499.78	2069.14
ENSG00000250616	66.7029	1.32034	2.74698e-07	16	30096430	30104116		RP11-455F5.3	antisense	24.3596	39.6078	20.113	135.704	21.6698	110.772	47.7329	59.3443	4.81525	30.5267	32.8251	153.79	12.8151	146.51	60.0227	110.926	27.5506	73.514	18.9162	63.1113	4.28208	17.4986	13.6958	153.407	98.0985	131.547	133.629	120.895
ENSG00000162949	11.1156	1.6726	2.75328e-07	2	30722771	30820542	calpain 13 [Source:HGNC Symbol;Acc:HGNC:16663]	CAPN13	protein_coding	0.811988	8.64171	0	9.88576	1.39805	14.9116	6.50903	10.1733	13.6432	78.0915	1.82362	25.9196	0	40.2184	6.57783	11.9275	2.90006	6.80685	1.89162	5.40954	0	12.352	5.4783	18.9132	0	5.59775	4.63991	16.7136
ENSG00000127311	491.58	-0.810731	2.80254e-07	12	66302545	66347645	DNA helicase B [Source:HGNC Symbol;Acc:HGNC:17196]	HELB	protein_coding	407.618	301.02	613.075	228.271	1530.87	494.212	437.19	278.918	517.639	482.748	797.832	501.977	651.238	333.238	316.558	182.491	1479.03	473.757	488.038	266.87	799.679	240.864	234.197	236.416	430.479	263.094	425.944	350.986
ENSG00000140995	1242.76	0.603948	2.87162e-07	16	89947925	89968060	differentially expressed in FDCP 8 homolog [Source:HGNC Symbol;Acc:HGNC:25969]	DEF8	protein_coding	959.77	1247.29	709.916	1305.82	542.444	1223.46	919.942	1452.24	1196.59	1346.01	734.917	1805.73	934.335	1609.69	1229.23	1622.15	614.812	1223.87	1004.45	1233.37	659.441	1201.23	1514.75	1626.54	1477.25	2015.19	1501.47	1885.29
ENSG00000183621	1076.96	-0.678696	2.89454e-07	10	30820207	31031937	zinc finger protein 438 [Source:HGNC Symbol;Acc:HGNC:21029]	ZNF438	protein_coding	1303.24	584.036	1310.33	1083.84	1367.29	1227.72	564.116	464.581	768.032	616.923	1908.41	1459.28	2065.55	714.355	1565.52	1093.76	1634.18	876.722	1365.75	888.967	1119.76	725.679	825.854	466.527	1039.84	600.359	1865.24	649.045
ENSG00000174885	149.296	1.12497	3.02552e-07	11	278365	285359	NLR family pyrin domain containing 6 [Source:HGNC Symbol;Acc:HGNC:22944]	NLRP6	protein_coding	103.934	195.879	126.638	175.247	50.3299	142.725	111.738	150.056	65.0058	195.939	181.45	369.787	57.0853	578.378	88.8008	161.022	31.9006	238.24	37.8324	99.1748	16.0578	89.5518	63.0005	138.697	64.6296	90.9634	251.483	304.745
ENSG00000244879	80.1796	0.819491	3.16537e-07	15	50354959	50372202	GABPB1 antisense RNA 1 [Source:HGNC Symbol;Acc:HGNC:44157]	GABPB1-AS1	antisense	107.994	131.066	31.287	68.3016	34.9513	67.4571	60.7509	84.7776	76.2414	177.481	54.7085	77.7589	67.5703	154.17	52.6227	106.155	75.4015	132.053	58.6402	119.01	40.6798	67.9359	31.5002	50.4353	57.705	55.9775	38.0473	164.35
ENSG00000155090	166.762	1.06474	3.29635e-07	8	102648779	102655902	Kruppel like factor 10 [Source:HGNC Symbol;Acc:HGNC:11810]	KLF10	protein_coding	75.5149	379.515	156.435	633.587	106.252	179.649	66.1751	106.82	66.6109	68.1526	135.859	847.572	76.8904	321.747	96.2008	139.552	72.5015	186.508	83.2312	97.3717	50.3145	98.8158	39.7177	110.327	64.6296	111.955	139.197	158.222
ENSG00000172594	779.497	-1.12427	3.43819e-07	6	122789049	122809720	sphingomyelin phosphodiesterase acid like 3A [Source:HGNC Symbol;Acc:HGNC:17389]	SMPDL3A	protein_coding	764.893	247.009	403.006	351.394	749.356	590.782	338.469	287.396	726.299	164.702	929.132	791.413	3162.99	595.615	1086.99	728.773	1339.83	170.171	1029.04	504.89	2605.65	387.029	472.504	276.344	627.831	321.871	1627.68	544.863
ENSG00000134242	1708.02	-0.673397	3.55838e-07	1	113813811	113871759	protein tyrosine phosphatase, non-receptor type 22 [Source:HGNC Symbol;Acc:HGNC:9652]	PTPN22	protein_coding	2791.61	1232.88	2239.25	1186.29	2686.36	1529.5	725.756	1009.7	891.623	448.671	1890.18	1293.39	2544.37	1094.51	2378.71	1572.05	2701.4	1629.56	2167.8	1725.64	2897.9	2172.92	2285.82	1165.27	1395.31	1091.56	2116.73	959.918
ENSG00000138031	162.703	-0.947092	3.56722e-07	2	24819169	24919839	adenylate cyclase 3 [Source:HGNC Symbol;Acc:HGNC:234]	ADCY3	protein_coding	220.049	127.465	120.678	39.543	67.1065	27.6929	248.428	114.45	498.378	176.061	45.5904	90.7187	82.7154	39.2608	55.0894	42.9391	62.3513	38.1184	253.477	68.5208	254.784	114.256	302.676	96.6677	68.0919	50.3797	882.511	367.699
ENSG00000184489	110.241	1.24933	3.81128e-07	8	141391993	141432454	protein tyrosine phosphatase type IVA, member 3 [Source:HGNC Symbol;Acc:HGNC:9636]	PTP4A3	protein_coding	17.0517	221.804	100.565	213.892	29.3591	71.7175	199.61	205.162	62.5982	321.595	37.3841	330.907	22.1351	138.849	55.0894	46.5174	30.4506	68.0685	62.4234	88.3558	23.5515	94.6985	34.2394	96.6677	126.951	223.91	47.3271	115.881
ENSG00000179299	452.921	-0.592186	4.16813e-07	4	40749897	40809985	NOP2/Sun RNA methyltransferase family member 7 [Source:HGNC Symbol;Acc:HGNC:25857]	NSUN7	protein_coding	647.966	349.269	646.597	239.954	426.406	408.293	196.356	124.623	260.826	166.122	866.218	584.92	732.789	602.318	807.429	448.476	694.564	491.454	315.9	227.201	446.407	438.495	354.72	197.538	401.627	256.097	833.328	515.893
ENSG00000138744	465.035	0.776528	4.17583e-07	4	75913657	75941051	N-acylethanolamine acid amidase [Source:HGNC Symbol;Acc:HGNC:736]	NAAA	protein_coding	245.22	344.228	563.91	1109.9	292.892	712.915	203.949	167.012	704.631	898.052	217.01	545.176	135.141	366.753	152.935	236.165	310.306	447.891	202.403	366.045	231.232	814.201	279.393	572.651	1102.17	1305.68	180.028	313.101
ENSG00000089195	346.6	-0.996593	4.17739e-07	20	5937235	5950558	tRNA methyltransferase 6 [Source:HGNC Symbol;Acc:HGNC:20900]	TRMT6	protein_coding	523.732	154.111	651.812	337.014	674.56	227.934	211.543	222.117	309.781	115.008	686.591	523.577	1065.98	130.231	361.781	300.574	421.959	132.053	287.526	227.201	488.157	270.714	190.371	116.632	227.358	114.754	545.653	186.078
ENSG00000106714	347.577	1.1696	4.30922e-07	9	39072767	39288315	contactin associated protein-like 3 [Source:HGNC Symbol;Acc:HGNC:13834]	CNTNAP3	protein_coding	207.057	290.218	64.8087	296.573	113.941	452.317	105.229	242.464	216.686	382.648	50.1494	628.119	104.851	765.106	508.96	1573.24	345.107	860.386	295.093	503.087	36.3977	110.138	430.047	287.902	107.331	212.714	216.22	325.358
ENSG00000064687	535.744	0.768459	4.32344e-07	19	1040101	1065572	ATP binding cassette subfamily A member 7 [Source:HGNC Symbol;Acc:HGNC:37]	ABCA7	protein_coding	485.569	1200.48	172.078	678.522	394.251	614.925	407.899	495.101	346.698	748.969	326.427	753.397	286.591	556.354	421.804	441.319	595.962	830.436	283.743	414.731	241.938	646.42	434.155	463.375	475.489	723.509	595.764	964.932
ENSG00000139192	202.195	0.689704	4.34719e-07	12	6451690	6466517	TAP binding protein like [Source:HGNC Symbol;Acc:HGNC:30683]	TAPBPL	protein_coding	177.013	205.241	90.8812	221.98	62.2133	193.85	284.227	328.937	142.852	318.045	158.655	280.796	149.121	245.14	173.49	236.165	118.902	197.399	85.1228	153.27	153.084	243.952	104.088	195.437	225.05	330.267	284.89	301.402
ENSG00000121966	3551.65	0.543837	4.44979e-07	2	136114349	136118165	C-X-C motif chemokine receptor 4 [Source:HGNC Symbol;Acc:HGNC:2561]	CXCR4	protein_coding	3503.73	4633.4	2133.47	3478.89	1716.81	3046.93	2233.68	4611.05	2341.01	3265.65	2723.57	2643.8	2377.78	2757.83	2293.2	4066.1	2885.56	4994.87	3711.36	6318.34	2206.34	3912.49	5122.21	5088.71	4204.39	5365.44	3076.26	4733.29
ENSG00000138180	76.8654	-1.11387	4.5614e-07	10	93496632	93529092	centrosomal protein 55 [Source:HGNC Symbol;Acc:HGNC:1161]	CEP55	protein_coding	31.6675	42.4884	49.9102	25.1637	193.63	34.0836	170.32	66.1265	85.0693	34.7862	88.4454	44.9274	79.2204	26.8122	134.846	27.4333	68.1514	6.80685	111.606	59.5049	282.617	82.3465	36.9785	29.4206	78.4788	36.3854	119.71	105.296
ENSG00000072657	48.4722	-0.968191	4.62554e-07	12	72087266	72670757	thyrotropin releasing hormone degrading enzyme [Source:HGNC Symbol;Acc:HGNC:30748]	TRHDE	protein_coding	12.1798	5.041	32.0319	17.9741	39.1454	14.9116	55.3267	21.1944	7.22287	2.12977	48.3258	13.8238	23.3001	16.2789	185.824	66.7942	46.4009	42.2025	62.4234	32.4572	109.193	81.3172	131.479	36.7758	46.164	46.1814	118.782	42.3411
ENSG00000155926	15954.1	-0.755812	4.70882e-07	8	133036724	133103054	Src-like-adaptor [Source:HGNC Symbol;Acc:HGNC:10902]	SLA	protein_coding	23984.5	10291.6	25128.6	12913.5	35428.7	15937.6	5400.32	7584.2	7686.74	3959.95	22363.9	13694.2	19960	12001.3	21566.3	12977.2	20829.7	13868.3	19644.5	13608.6	15912.2	15028.2	20246.4	7361.46	15515.7	9446.2	33762.8	10613.1
ENSG00000146425	1398.79	-0.509803	4.75624e-07	6	158636474	158644739	dynein light chain Tctex-type 1 [Source:HGNC Symbol;Acc:HGNC:11697]	DYNLT1	protein_coding	1696.24	1151.51	2002.37	1357.94	2360.61	1477.67	868.955	728.239	930.145	751.098	1499.92	845.844	1936.24	804.367	1522.77	1190.37	1844.44	1327.34	1360.07	1271.24	2145.32	1507.97	1479.14	1229.36	1315.67	1060.77	2230.87	1269.68
ENSG00000149573	49.3871	-1.13637	4.78788e-07	11	118253403	118264536	myelin protein zero like 2 [Source:HGNC Symbol;Acc:HGNC:3496]	MPZL2	protein_coding	22.7357	12.2424	69.2783	21.5689	297.086	51.8354	34.7148	32.2155	58.5855	46.8549	29.1779	15.5518	81.5504	21.0668	70.7117	14.313	210.254	39.4797	24.591	10.8191	24.622	8.23465	16.4349	16.8118	41.5476	19.5921	54.7509	36.2128
ENSG00000062716	6278.45	0.572832	4.91772e-07	17	59707192	59842255	vacuole membrane protein 1 [Source:HGNC Symbol;Acc:HGNC:29559]	VMP1	protein_coding	6262.05	9487.16	4987.29	8588.03	5274.15	7123.47	4149.5	4989.16	3807.25	6211.12	4766.02	7658.39	4170.72	8379.78	7578.49	8022.46	6574.43	9420.68	3936.46	6882.73	3082.03	8177.01	6260.33	8688.54	4393.66	6270.88	5346.1	5308.8
ENSG00000197766	726.514	0.929638	5.25893e-07	19	859643	863630	complement factor D [Source:HGNC Symbol;Acc:HGNC:2771]	CFD	protein_coding	77.1389	345.669	99.0754	242.65	1054.83	1541.57	195.271	200.075	1229.49	1848.64	98.4753	336.091	59.4153	172.364	378.225	560.594	114.552	185.146	51.0737	209.169	617.69	1992.79	1257.27	3650.26	281.6	352.658	1579.42	1611.19
ENSG00000271503	951.777	-0.926514	5.25893e-07	17	35871491	35880793	C-C motif chemokine ligand 5 [Source:HGNC Symbol;Acc:HGNC:10632]	CCL5	protein_coding	2086.81	1023.32	847.728	700.091	1369.39	308.172	838.58	483.232	439.792	399.687	1128.82	323.131	1261.7	510.39	1322.97	354.248	1777.74	936.622	1023.37	340.801	2521.08	799.791	1679.1	1453.17	1021.38	873.249	428.728	396.669
ENSG00000104626	571.975	-0.773036	5.30892e-07	8	9002147	9116746	exoribonuclease 1 [Source:HGNC Symbol;Acc:HGNC:23994]	ERI1	protein_coding	605.743	362.232	724.815	476.314	1361.7	428.175	352.572	254.333	522.454	272.61	483.258	318.812	1063.65	428.996	839.496	422.235	1392.03	387.99	624.234	521.119	1359.56	651.567	306.785	337.286	335.843	307.876	549.365	324.244
ENSG00000178789	124.388	1.00359	5.41319e-07	17	74521174	74531474	CD300 molecule like family member b [Source:HGNC Symbol;Acc:HGNC:30811]	CD300LB	protein_coding	55.2152	107.301	27.5623	82.6809	161.475	255.627	197.44	192.445	130.814	213.687	13.6771	106.271	38.4452	181.94	96.2008	114.504	65.2513	104.825	24.591	63.1113	36.3977	162.634	95.8703	185.98	130.413	239.304	117.854	281.346
ENSG00000158457	346.472	-0.873279	5.43438e-07	7	129144892	129169697	tetraspanin 33 [Source:HGNC Symbol;Acc:HGNC:28743]	TSPAN33	protein_coding	377.574	344.228	367.994	336.116	602.56	149.116	360.166	336.567	76.2414	53.2442	318.221	218.589	568.523	161.831	494.16	175.335	516.21	330.813	576.944	272.28	472.1	247.04	888.855	241.669	386.624	222.511	407.384	198.335
ENSG00000127314	2141.57	-0.413095	5.46699e-07	12	68610839	68671901	RAP1B, member of RAS oncogene family [Source:HGNC Symbol;Acc:HGNC:9857]	RAP1B	protein_coding	2131.47	1817.64	2640.02	2334.84	2986.94	2155.08	1998.27	1311.51	1420.5	1215.39	1977.71	1812.65	2071.38	1373.17	2324.44	1828.49	3246.62	2379.67	2973.62	2048.41	2958.92	2227.47	2462.5	1741.07	2470.93	2087.96	2620.62	1346.56
ENSG00000223855	51.4302	-1.04365	5.55814e-07	7	520391	525232	heart tissue-associated transcript 92 [Source:EntrezGene;Acc:441307]	HRAT92	lincRNA	73.8909	42.4884	29.7971	15.278	77.5919	12.0713	84.6173	17.8033	4.81525	4.25954	36.4723	12.0958	52.4253	29.685	83.8674	32.2044	120.352	46.2866	37.8324	10.8191	115.616	33.9679	115.044	106.124	73.8624	51.7792	67.7427	51.255
ENSG00000130766	165.301	-1.05201	5.79091e-07	1	28259527	28282491	sestrin 2 [Source:HGNC Symbol;Acc:HGNC:20746]	SESN2	protein_coding	215.177	113.062	323.299	118.629	290.096	54.6757	104.144	95.7986	78.649	48.2748	391.166	160.702	908.704	99.5883	220.357	89.4566	258.105	72.1526	100.256	91.9621	225.88	111.168	65.7396	45.1816	105.023	62.9747	100.222	77.9968
ENSG00000065534	817.329	-0.896269	6.16621e-07	3	123610049	123884331	myosin light chain kinase [Source:HGNC Symbol;Acc:HGNC:7590]	MYLK	protein_coding	1083.19	697.098	373.209	260.624	1081.39	233.615	1619.66	521.382	106.738	46.145	707.563	193.533	1266.36	615.724	1105.9	492.607	942.519	721.526	841.77	232.61	2017.93	1057.12	1512.01	1262.98	919.818	964.212	1104.3	903.649
ENSG00000125629	434.635	-0.679778	6.28719e-07	2	118088452	118110997	insulin induced gene 2 [Source:HGNC Symbol;Acc:HGNC:20452]	INSIG2	protein_coding	476.637	280.136	835.809	452.947	641.007	411.133	239.749	295.026	370.774	232.145	752.242	499.385	892.394	282.486	454.693	442.512	497.36	295.417	609.101	416.534	524.555	258.362	391.699	197.538	305.837	207.117	609.684	297.502
ENSG00000174175	888.562	-0.986839	6.28719e-07	1	169588849	169630193	selectin P [Source:HGNC Symbol;Acc:HGNC:10721]	SELP	protein_coding	732.413	755.43	587.003	375.659	957.665	193.85	1948.37	528.164	133.222	59.6335	1316.65	273.884	1714.89	555.396	1369.83	431.777	720.665	562.246	1333.59	355.226	1558.68	1197.11	1659.93	1016.06	1283.36	1092.96	1249.06	917.02
ENSG00000107736	239.91	0.726752	6.38531e-07	10	71396934	71815947	cadherin related 23 [Source:HGNC Symbol;Acc:HGNC:13733]	CDH23	protein_coding	215.177	229.005	204.855	376.557	140.504	203.081	241.919	274.679	177.362	400.396	257.13	523.577	93.2005	197.261	115.934	143.13	59.4512	191.953	111.606	234.413	113.475	324.239	112.305	191.234	297.758	376.449	405.528	505.308
ENSG00000196562	876.036	0.972313	6.47036e-07	20	47656348	47786616	sulfatase 2 [Source:HGNC Symbol;Acc:HGNC:20392]	SULF2	protein_coding	229.793	1161.59	858.157	1907.05	377.474	477.17	698.635	1422.57	1586.62	2610.39	267.16	871.764	278.436	489.323	481.826	466.367	427.759	1010.14	586.402	988.142	63.1607	468.346	246.524	787.001	1429.93	2518.99	858.383	959.918
ENSG00000115839	978.942	-0.419435	6.58227e-07	2	135052265	135176394	RAB3 GTPase activating protein catalytic subunit 1 [Source:HGNC Symbol;Acc:HGNC:17063]	RAB3GAP1	protein_coding	1062.89	676.934	1109.94	852.871	1159.68	962.861	740.944	605.312	875.572	672.297	1028.52	895.091	1392.18	789.046	1177.43	912.457	1294.88	711.996	1080.11	961.094	1292.12	1103.44	997.051	835.335	1254.51	876.048	1249.06	840.694
ENSG00000183160	26.8989	1.39183	6.63721e-07	12	108589846	108598320	transmembrane protein 119 [Source:HGNC Symbol;Acc:HGNC:27884]	TMEM119	protein_coding	13.8038	41.7683	17.1333	56.6184	4.19415	40.4742	35.7996	69.5176	8.82795	49.6946	9.11808	37.1515	1.16501	32.5577	11.5112	44.1319	2.90006	40.8411	11.3497	66.7176	3.21156	19.5573	9.58703	26.2684	23.082	13.9944	34.3353	27.856
ENSG00000263264	116.455	0.687552	6.6985e-07	19	7348943	7383385		CTB-133G6.1	protein_coding	95.8146	111.622	98.3304	177.045	39.1454	137.044	117.162	131.405	138.037	233.565	98.4753	136.51	85.0454	139.807	47.6893	97.8058	94.2519	145.667	81.3396	115.403	36.3977	69.9945	101.349	121.885	128.105	214.114	87.2303	180.507
ENSG00000105507	17.6204	-1.14295	6.74824e-07	19	48029953	48044053	calcium binding protein 5 [Source:HGNC Symbol;Acc:HGNC:13714]	CABP5	protein_coding	38.1634	11.5223	37.9913	19.7715	25.864	4.97052	33.63	8.47776	4.81525	1.41985	11.8535	6.9119	16.3101	9.5758	31.2447	5.96377	20.3004	12.2523	11.3497	9.01589	25.6925	8.23465	46.5656	16.8118	35.7771	16.7932	12.0638	10.0282
ENSG00000104419	1022.44	-0.744006	6.87984e-07	8	133237171	133302022	N-myc downstream regulated 1 [Source:HGNC Symbol;Acc:HGNC:7679]	NDRG1	protein_coding	508.304	688.456	2307.79	722.559	1237.28	484.271	788.677	561.227	669.319	627.572	3041.79	1760.81	2241.47	989.18	1204.57	694.183	1680.58	717.442	1218.2	658.16	770.775	511.578	558.787	359.352	802.1	565.373	1509.83	748.769
ENSG00000064419	1957.43	-0.519202	7.00946e-07	7	128954180	129055173	transportin 3 [Source:HGNC Symbol;Acc:HGNC:17103]	TNPO3	protein_coding	2321.47	1475.57	2567.77	1791.12	2668.18	1715.54	1095.69	1275.9	1469.45	905.862	2407.17	1717.61	3308.62	1435.41	2553.84	1844	3023.31	2142.8	2561.25	2122.34	2290.91	1775.6	2306.37	1255.63	1944.66	1523.99	1997.02	1310.9
ENSG00000123416	2146.08	-0.623324	7.39488e-07	12	49127782	49131397	tubulin alpha 1b [Source:HGNC Symbol;Acc:HGNC:18809]	TUBA1B	protein_coding	1714.11	1559.83	2971.52	1809.09	3425.93	1643.11	2125.2	1949.88	1734.29	1571.77	2639.68	1701.19	2688.83	925.022	2922.2	1479.01	2728.95	1347.76	2415.6	1561.55	2885.05	1988.67	2109.15	1874.51	2908.33	1939.62	3455.8	2014.55
ENSG00000112062	15605.8	-0.571609	7.4813e-07	6	36027677	36111236	mitogen-activated protein kinase 14 [Source:HGNC Symbol;Acc:HGNC:6876]	MAPK14	protein_coding	19302.6	11973.1	15356.7	16325	24092.6	15709	7415.95	6838.16	12408.1	5991.75	15571.9	15724.6	23141.7	13166.7	23237.8	15857.7	25469.8	12878.6	21439.6	16019.4	21174.9	14031.8	16582.8	8223.06	15148.7	10194.9	21976.5	11709
ENSG00000133943	279.662	0.654082	8.10409e-07	14	91060333	91225632	chromosome 14 open reading frame 159 [Source:HGNC Symbol;Acc:HGNC:20498]	C14orf159	protein_coding	230.605	324.784	126.638	164.463	192.232	279.059	251.682	396.759	202.24	520.373	160.478	165.886	131.646	313.129	192.402	203.961	233.455	624.869	145.655	194.743	263.348	427.173	212.284	373.011	423.555	575.169	180.028	320.901
ENSG00000112137	133.188	-1.29707	8.10409e-07	6	12716805	13290484	phosphatase and actin regulator 1 [Source:HGNC Symbol;Acc:HGNC:20990]	PHACTR1	protein_coding	48.7193	43.2086	249.551	53.0236	503.998	48.2851	56.4116	193.293	40.9296	23.4275	293.602	86.3988	383.287	36.388	242.558	52.4812	352.357	153.835	54.8569	23.4413	96.3469	20.5866	110.936	46.2324	225.05	97.9606	155.901	36.2128
ENSG00000214110	57.8406	-0.980118	8.34945e-07	9	14921337	14922334	lactate dehydrogenase A pseudogene 4 [Source:HGNC Symbol;Acc:HGNC:6539]	LDHAP4	processed_pseudogene	71.4549	53.2906	93.8609	45.834	116.038	89.4694	40.139	24.5855	62.5982	20.5878	100.299	86.3988	76.8904	12.4485	106.89	70.3725	55.1011	21.7819	0	0	111.334	42.2026	83.5441	24.1669	62.3214	33.5865	90.9422	23.399
ENSG00000154928	65.3812	1.40342	8.39492e-07	3	134597801	135260467	EPH receptor B1 [Source:HGNC Symbol;Acc:HGNC:3392]	EPHB1	protein_coding	25.9836	60.492	18.6232	97.9589	37.7474	42.6045	88.9567	109.363	10.433	228.595	8.20627	83.8068	8.15504	117.782	50.156	26.2406	13.0503	44.9252	11.3497	28.8509	7.49364	58.6719	41.0873	119.784	88.8657	274.29	15.7757	111.424
ENSG00000133104	793.564	-0.454968	8.44278e-07	13	36301638	36370180	spastic paraplegia 20 (Troyer syndrome) [Source:HGNC Symbol;Acc:HGNC:18514]	SPG20	protein_coding	1317.86	959.23	1378.86	822.315	770.326	568.77	441.529	394.216	686.172	378.389	1002.99	650.583	928.509	910.659	963.653	724.002	991.82	669.794	849.337	757.335	1117.62	920.222	747.788	587.361	765.168	538.783	889.007	487.48
ENSG00000132965	9021.74	-0.781972	8.49272e-07	13	30713478	30764426	arachidonate 5-lipoxygenase activating protein [Source:HGNC Symbol;Acc:HGNC:436]	ALOX5AP	protein_coding	11986.6	5444.28	19754.7	6840.94	11916.3	4121.27	4459.77	5513.09	2805.68	1803.2	12059.6	4170.47	18169.4	7242.18	12325.2	10131.3	14915	8799.89	8179.36	7719.41	11339	8072.02	10265	5150.71	5104.59	4056.97	20823	9439.84
ENSG00000152760	54.8512	-1.15699	9.20122e-07	1	66752459	66778787	Tctex1 domain containing 1 [Source:HGNC Symbol;Acc:HGNC:26882]	TCTEX1D1	protein_coding	15.4278	3.60071	75.9826	26.0624	97.1646	29.1131	79.1931	36.4544	111.553	67.4427	68.3856	34.5595	161.936	27.7698	25.4891	9.54203	23.2005	8.16822	87.0145	48.6858	282.617	25.7333	35.609	14.7103	27.6984	23.7904	39.9032	49.0266
ENSG00000206560	1237.36	-0.692439	9.38412e-07	3	15667236	15859771	ankyrin repeat domain 28 [Source:HGNC Symbol;Acc:HGNC:29024]	ANKRD28	protein_coding	2510.67	895.858	2708.56	882.528	893.355	706.524	964.421	612.942	590.67	426.664	1003.9	655.767	1421.31	1024.61	1572.92	1547	3013.16	1184.39	1032.82	634.719	2051.12	920.222	2111.89	1421.65	1328.37	1056.58	813.84	659.63
ENSG00000116793	873.468	-0.57089	9.60112e-07	1	113696831	113759489	putative homeodomain transcription factor 1 [Source:HGNC Symbol;Acc:HGNC:8939]	PHTF1	protein_coding	1231.79	697.098	968.406	540.122	1307.18	721.436	574.964	460.342	557.766	252.023	880.807	574.552	1182.48	837.882	1488.24	1069.9	1513.83	1129.94	976.075	973.717	1150.81	1000.51	1186.05	474.933	640.526	547.18	891.79	626.76
ENSG00000102524	3443.36	-0.82564	9.60112e-07	13	108251240	108308484	tumor necrosis factor superfamily member 13b [Source:HGNC Symbol;Acc:HGNC:11929]	TNFSF13B	protein_coding	4193.92	1510.86	1800.49	2093.98	7517.32	3303.98	1901.72	1348.81	3361.84	1404.23	2850.31	2028.64	2847.27	3283.54	7356.49	3220.44	7412.55	1769.78	4082.11	2394.62	6596.55	3830.14	3993.68	2730.86	4078.59	2243.3	5405.49	1852.42
ENSG00000198689	535.788	-0.49902	9.64781e-07	X	135973841	136047269	solute carrier family 9 member A6 [Source:HGNC Symbol;Acc:HGNC:11079]	SLC9A6	protein_coding	617.111	375.194	884.229	552.704	673.861	579.421	276.634	272.136	717.472	392.587	636.442	509.753	688.518	437.614	709.584	518.848	658.313	349.872	486.146	488.661	675.499	488.932	569.743	399.28	543.581	415.633	701.554	382.741
ENSG00000174233	31.5647	-1.08286	9.87077e-07	12	48766194	48789037	adenylate cyclase 6 [Source:HGNC Symbol;Acc:HGNC:237]	ADCY6	protein_coding	21.1117	13.6827	17.1333	8.98705	61.5143	12.7813	74.8538	22.8899	8.82795	5.67938	49.2376	7.77589	61.7453	20.1092	52.6227	14.313	30.4506	12.2523	64.315	18.0318	46.0324	24.704	31.5002	27.3191	78.4788	54.5781	22.2716	20.6134
ENSG00000188897	316.762	1.15394	1.0012e-06	16	11359845	11523588		CTD-3088G3.8	protein_coding	198.937	352.15	94.6058	253.435	218.096	394.091	129.096	143.274	86.6744	490.557	249.835	740.438	54.7553	834.052	222.824	280.297	394.408	1189.84	56.7486	117.207	22.4809	135.872	98.6094	398.229	617.444	530.387	180.028	384.97
ENSG00000159459	1002.65	-0.406418	1.00633e-06	15	42942897	43106113	ubiquitin protein ligase E3 component n-recognin 1 [Source:HGNC Symbol;Acc:HGNC:16808]	UBR1	protein_coding	1113.24	752.549	1165.81	988.576	1330.94	958.601	757.217	666.352	910.081	692.885	1112.41	713.654	1183.65	900.125	939.808	916.035	1381.88	808.654	1112.27	943.063	1811.32	1159.03	1023.07	863.705	944.054	782.285	1309.38	833.452
ENSG00000124766	51.3101	1.15907	1.03269e-06	6	21592768	21598619	SRY-box 4 [Source:HGNC Symbol;Acc:HGNC:11200]	SOX4	protein_coding	46.2833	196.599	32.0319	54.821	30.0581	85.2089	28.2058	49.171	60.9931	35.4961	23.707	52.7033	10.4851	86.1822	23.0224	51.2884	23.2005	99.38	11.3497	55.8985	9.63469	65.8772	61.6309	86.1603	23.082	69.9719	24.1275	40.1126
ENSG00000167552	4921.36	-0.661414	1.03269e-06	12	49184796	49189324	tubulin alpha 1a [Source:HGNC Symbol;Acc:HGNC:20766]	TUBA1A	protein_coding	4016.09	1737.7	8086.93	4177.18	5850.15	4451.46	4098.52	3738.69	4088.14	3037.05	5427.08	6276.01	6294.53	3560.28	7650.84	4264.1	8775.58	2741.8	5075.21	3263.75	5190.95	3230.04	5504.32	4010.66	6608.38	4364.84	8254.4	4023.52
ENSG00000155307	7893.86	-0.829524	1.04751e-06	21	14485228	14583402	SAM domain, SH3 domain and nuclear localization signals 1 [Source:HGNC Symbol;Acc:HGNC:10528]	SAMSN1	protein_coding	12299.2	5592.63	11042.1	6131.86	20394.8	7161.1	2857.46	2552.65	2259.15	859.007	11640.1	3048.15	16680.6	8733.13	13677	9745.99	8188.31	6825.91	9637.8	10316	9486.95	9021.06	7421.73	2414.59	3795.84	2278.28	12561.2	4405.71
ENSG00000162066	74.8897	0.679395	1.05302e-06	16	2520357	2531422	amidohydrolase domain containing 2 [Source:HGNC Symbol;Acc:HGNC:24262]	AMDHD2	protein_coding	53.5912	81.3761	38.7362	65.6055	43.3396	75.978	74.8538	115.297	69.8211	102.939	79.3273	78.6229	68.7353	98.6307	63.3117	72.758	27.5506	65.3457	28.3743	73.9303	29.9746	76.1705	45.196	100.871	79.6329	114.754	98.3661	173.821
ENSG00000143771	1256.16	-0.460339	1.10447e-06	1	224356850	224379459	cornichon family AMPA receptor auxiliary protein 4 [Source:HGNC Symbol;Acc:HGNC:25013]	CNIH4	protein_coding	1692.18	949.148	1265.63	1101.81	2341.74	1381.09	764.811	662.113	919.712	562.969	1033.99	929.651	2006.14	1275.5	1315.57	1050.82	2043.09	1129.94	1554.91	1348.78	1809.18	1551.2	1147.7	795.407	1017.92	863.453	1623.97	1034.01
ENSG00000132470	22.0748	1.45309	1.13427e-06	17	75721328	75757818	integrin subunit beta 4 [Source:HGNC Symbol;Acc:HGNC:6158]	ITGB4	protein_coding	10.5558	24.4849	4.46957	6.29094	0	6.39067	22.7816	57.6487	16.8534	73.1221	2.73542	121.822	1.16501	36.388	16.4446	21.4696	0	2.72274	3.78324	9.01589	4.28208	13.3813	6.84788	27.3191	11.541	51.7792	18.5596	46.241
ENSG00000143889	600.225	-0.439888	1.1673e-06	2	38561978	38603586	heterogeneous nuclear ribonucleoprotein L like [Source:HGNC Symbol;Acc:HGNC:25127]	HNRNPLL	protein_coding	831.476	497.619	677.884	455.643	864.695	542.497	465.395	454.408	596.288	363.481	552.556	476.057	612.793	487.408	637.228	463.981	716.314	589.473	696.116	629.309	1137.96	648.479	638.222	442.36	526.27	452.018	786.001	564.363
ENSG00000003436	278.558	-0.764164	1.1673e-06	2	187464230	187565760	tissue factor pathway inhibitor [Source:HGNC Symbol;Acc:HGNC:11760]	TFPI	protein_coding	453.901	321.184	160.159	168.957	156.582	73.1377	481.668	203.466	40.127	20.5878	268.072	57.0232	386.782	215.455	626.539	300.574	259.555	189.23	244.019	129.829	537.401	281.008	599.874	441.309	341.614	326.069	337.785	177.721
ENSG00000120279	65.1695	-0.9026	1.1673e-06	6	152697895	152724567	myc target 1 [Source:HGNC Symbol;Acc:HGNC:23172]	MYCT1	protein_coding	83.6348	66.2531	44.6957	35.0495	86.6792	13.4914	81.3628	31.3677	6.42033	7.09923	52.8849	31.9676	109.511	48.8366	155.401	58.4449	95.7019	44.9252	85.1228	27.0477	133.815	94.6985	120.523	55.689	76.1706	58.7764	77.9505	41.2269
ENSG00000178904	1074.24	-0.687956	1.18779e-06	19	32405543	32485895	dpy-19 like 3 (C. elegans) [Source:HGNC Symbol;Acc:HGNC:27120]	DPY19L3	protein_coding	1653.21	704.3	1178.48	611.119	840.229	746.998	433.935	624.811	554.556	320.175	2144.57	1537.03	2171.57	1002.59	2169.04	1603.06	1699.43	1014.22	1549.24	1007.98	1301.75	740.089	1144.97	390.874	776.709	426.828	1094.09	636.788
ENSG00000155096	3818.52	-0.708565	1.22927e-06	8	102826357	102893864	antizyme inhibitor 1 [Source:HGNC Symbol;Acc:HGNC:16432]	AZIN1	protein_coding	4505.72	3087.97	4998.46	2730.27	5988.55	3403.39	2345.42	3708.17	3243.07	1654.12	5063.27	2616.16	8156.2	2345.11	6043.39	3297.96	5296.96	3427.93	4677.97	3523.41	6028.1	2764.78	4095.03	2598.47	3132.23	1921.43	3815.86	2449.1
ENSG00000196664	106.961	1.05799	1.23094e-06	X	12867083	12890380	toll like receptor 7 [Source:HGNC Symbol;Acc:HGNC:15631]	TLR7	protein_coding	25.9836	79.9358	24.5826	91.6679	47.5337	165.447	132.35	134.796	372.379	349.992	19.148	147.742	48.9302	120.655	65.7783	133.588	108.752	117.078	7.56647	45.0795	35.3272	94.6985	38.3481	136.596	122.335	181.927	38.0473	108.638
ENSG00000143862	302.266	-0.632701	1.23094e-06	1	202133404	202144743	ADP ribosylation factor like GTPase 8A [Source:HGNC Symbol;Acc:HGNC:25192]	ARL8A	protein_coding	264.708	203.08	256.255	119.528	255.843	126.393	258.191	103.429	232.737	137.015	561.674	409.53	932.005	378.244	508.96	369.754	259.555	130.691	296.984	292.115	461.394	316.005	335.546	240.619	178.886	166.533	367.481	300.288
ENSG00000102144	13630.2	-0.556292	1.24199e-06	X	78065188	78129296	phosphoglycerate kinase 1 [Source:HGNC Symbol;Acc:HGNC:8896]	PGK1	protein_coding	16121.2	8285.24	18545	12431.8	17883.2	12978	7925.82	7376.5	10320.7	5032.64	17911.6	9704.31	19108.4	13231.8	15704.6	12990.3	16923.3	10018.3	15914.2	16524.3	19033.9	12151.3	14958.5	11847	13820.4	11192.7	23494.6	10217
ENSG00000072818	1672.78	-0.621083	1.26106e-06	17	7336529	7351478	ArfGAP with coiled-coil, ankyrin repeat and PH domains 1 [Source:HGNC Symbol;Acc:HGNC:16467]	ACAP1	protein_coding	850.151	635.166	1248.5	760.305	1421.12	1146.06	1200.92	705.349	2010.36	1091.86	2336.05	1985.44	3538.12	1286.03	2442.02	1285.79	2599.9	912.118	1859.46	1520.08	2538.2	1678.84	1917.41	1462.62	2295.51	1851.46	2306.96	1952.15
ENSG00000163131	23986.7	0.428088	1.26223e-06	1	150730196	150765957	cathepsin S [Source:HGNC Symbol;Acc:HGNC:2545]	CTSS	protein_coding	18935.6	20663.8	19091.8	32867.4	21142.7	31365.4	21677.2	25671.5	24813	27169.5	10698.2	14412.2	18380.3	30744.1	22365.5	29181.9	16330.2	22145.4	16398.4	27307.3	17487	30153.2	23903.2	28418.2	30354	38603.5	24513.6	26832.6
ENSG00000169446	604.988	-0.552284	1.26223e-06	X	135962070	135974063	membrane magnesium transporter 1 [Source:HGNC Symbol;Acc:HGNC:28100]	MMGT1	protein_coding	816.86	535.066	1066.74	627.296	660.579	505.573	288.567	354.37	506.403	372.709	914.544	600.472	1096.27	418.462	878.141	663.171	903.368	566.33	684.766	542.757	709.755	459.082	556.048	349.895	549.352	380.647	583.701	348.757
ENSG00000071073	1830.67	-0.588452	1.26223e-06	2	98619106	98731126	mannosyl (alpha-1,3-)-glycoprotein beta-1,4-N-acetylglucosaminyltransferase, isozyme A [Source:HGNC Symbol;Acc:HGNC:7047]	MGAT4A	protein_coding	2074.63	1039.89	2800.93	1790.22	2420.73	1607.61	1186.81	1147.04	1746.33	1172.79	3071.88	1739.21	2121.48	1423.92	2622.09	1897.67	3364.07	1291.94	2173.47	1794.16	2981.4	1282.55	1651.71	1415.34	1144.87	1083.16	1926.49	1286.39
ENSG00000102362	199.913	-0.821564	1.28389e-06	X	100674491	100732123	synaptotagmin like 4 [Source:HGNC Symbol;Acc:HGNC:15588]	SYTL4	protein_coding	247.656	171.394	151.22	119.528	239.766	50.4153	302.67	97.4942	13.6432	9.229	127.653	45.7914	266.786	182.898	289.425	113.312	224.755	147.028	296.984	106.388	451.76	309.829	342.394	236.416	297.758	233.706	293.242	228.419
ENSG00000112031	197.437	-0.475984	1.32673e-06	6	152987362	153002685	mitochondrial translational release factor 1 like [Source:HGNC Symbol;Acc:HGNC:21051]	MTRF1L	protein_coding	267.956	201.64	332.238	256.131	286.601	196.691	142.114	108.515	119.579	90.8701	244.365	119.23	137.471	149.382	207.202	135.974	214.604	163.364	183.487	137.042	353.272	222.336	273.915	177.574	250.44	177.729	220.86	157.665
ENSG00000160588	1976.88	-0.929934	1.34648e-06	11	118226690	118252350	myelin protein zero like 3 [Source:HGNC Symbol;Acc:HGNC:27279]	MPZL3	protein_coding	1476.19	808	2097.72	1108.1	5766.96	1188.66	915.603	1336.09	1415.68	687.205	1783.5	1091.22	4140.43	1464.14	2913.98	1134.31	7152.99	1459.39	1919.99	1098.14	2815.47	876.99	2183.1	1655.96	1651.52	1490.4	2198.39	1522.61
ENSG00000167434	1065.96	-0.943525	1.34648e-06	17	60149936	60170899	carbonic anhydrase 4 [Source:HGNC Symbol;Acc:HGNC:1375]	CA4	protein_coding	1272.39	771.273	1556.15	552.704	2067.72	737.767	459.971	958.834	731.115	168.252	1115.14	656.631	3119.89	735.421	1132.21	784.832	1238.32	755.56	1441.41	1087.32	1895.89	639.215	1459.97	566.347	688.998	383.446	2026.71	843.48
ENSG00000113851	1359.91	-0.469619	1.38591e-06	3	3148992	3179710	cereblon [Source:HGNC Symbol;Acc:HGNC:30185]	CRBN	protein_coding	2063.26	1119.82	1661.93	1141.36	1367.99	1121.92	930.791	813.865	1364.32	844.808	1412.39	949.523	1538.97	1368.38	1674.88	1303.68	2002.49	952.959	1747.86	1235.18	2267.36	1630.46	1417.51	1352.3	1291.44	1081.77	1472.71	947.661
ENSG00000182621	74.8684	0.748705	1.39339e-06	20	8077251	8968360	phospholipase C beta 1 [Source:HGNC Symbol;Acc:HGNC:15917]	PLCB1	protein_coding	57.6511	161.312	31.287	59.3145	62.2133	79.5283	37.9693	39.8455	151.68	228.595	94.828	141.694	17.4751	49.7942	36.1781	45.3247	71.0514	196.037	43.5072	100.978	29.9746	48.3786	39.7177	56.7397	32.3148	65.7736	49.183	67.9686
ENSG00000268734	547.617	-1.02503	1.40289e-06	19	54890673	54891420		CTB-61M7.2	lincRNA	661.77	441.447	626.484	443.062	1296.69	289	177.913	453.56	283.297	92.29	628.236	582.328	1452.76	348.559	1116.59	400.765	1354.33	495.539	837.987	403.912	729.025	294.389	476.612	128.19	432.788	167.932	531.734	186.078
ENSG00000213694	54.1286	1.19059	1.44454e-06	9	88991447	89005010	sphingosine-1-phosphate receptor 3 [Source:HGNC Symbol;Acc:HGNC:3167]	S1PR3	protein_coding	36.5395	296.699	12.6638	64.7068	43.3396	43.3145	43.3935	44.0843	64.2033	88.0304	9.11808	57.0232	17.4751	53.6245	14.8001	53.6739	56.5511	98.0186	15.1329	37.8668	8.56417	82.3465	30.1307	75.653	43.8558	60.1758	16.7037	47.9123
ENSG00000235609	55.2468	-0.777124	1.44454e-06	21	14818843	15014430		AF127936.9	lincRNA	77.9508	62.6524	87.1565	32.3534	95.0675	25.5627	35.7996	22.8899	20.0635	11.3588	46.5022	16.4158	55.9203	30.6426	94.5564	57.2522	73.9515	47.6479	64.315	46.8827	114.546	77.1999	106.827	67.2471	55.3968	34.9859	50.111	35.6557
ENSG00000183340	143.592	-0.573734	1.48259e-06	11	96389989	96507574	JRK-like [Source:HGNC Symbol;Acc:HGNC:6200]	JRKL	protein_coding	201.373	131.786	332.238	195.019	195.727	156.216	112.823	76.2998	169.336	109.328	202.421	107.998	202.711	110.122	119.223	139.552	131.953	106.187	124.847	102.781	194.835	121.461	123.262	87.2111	129.259	65.7736	180.028	90.8106
ENSG00000173530	122.304	-1.06904	1.51867e-06	8	23135588	23164030	TNF receptor superfamily member 10d [Source:HGNC Symbol;Acc:HGNC:11907]	TNFRSF10D	protein_coding	49.5313	60.492	304.675	112.338	442.483	66.0369	72.6841	40.6932	77.0439	58.9236	192.392	67.3911	311.057	66.073	70.7117	32.2044	543.761	95.2959	79.448	41.4731	150.943	56.6132	46.5656	59.8919	106.177	57.3769	99.294	62.9546
ENSG00000138821	799.212	-0.746966	1.57552e-06	4	102251041	102431258	solute carrier family 39 member 8 [Source:HGNC Symbol;Acc:HGNC:20862]	SLC39A8	protein_coding	519.672	374.474	549.012	434.075	847.219	542.497	993.711	403.541	790.503	335.794	2906.84	728.342	1118.41	578.378	786.873	502.149	513.31	182.424	696.116	656.357	1859.49	1354.6	527.287	553.738	1105.63	629.747	1170.19	717.571
ENSG00000108819	590.039	0.627778	1.59114e-06	17	50133735	50150630	protein phosphatase 1 regulatory subunit 9B [Source:HGNC Symbol;Acc:HGNC:9298]	PPP1R9B	protein_coding	233.853	529.305	254.02	469.124	336.231	434.566	1410.29	1438.68	585.855	799.373	468.669	1157.74	516.097	936.513	445.648	625.003	187.054	303.585	518.304	416.534	263.348	428.202	257.48	528.52	691.306	1172.73	425.016	688.043
ENSG00000010219	125.633	-1.00501	1.59114e-06	12	4562204	4615302	dual specificity tyrosine phosphorylation regulated kinase 4 [Source:HGNC Symbol;Acc:HGNC:3095]	DYRK4	protein_coding	110.43	37.4474	57.3594	53.0236	135.611	51.1254	70.5144	69.5176	122.789	61.7633	103.034	49.2473	527.748	73.7337	253.247	95.4203	443.709	103.464	259.152	203.759	114.546	48.3786	126.001	35.725	40.3935	40.5837	130.845	99.1674
ENSG00000163964	504.444	0.789815	1.63324e-06	3	196639775	196736007	phosphatidylinositol glycan anchor biosynthesis class X [Source:HGNC Symbol;Acc:HGNC:26046]	PIGX	protein_coding	256.588	427.765	595.942	1127.87	189.436	779.662	328.706	474.754	410.901	631.831	354.693	824.244	164.266	679.882	440.715	458.018	333.507	548.632	208.078	306.54	159.508	376.735	475.243	817.473	871.346	1115.35	368.409	398.341
ENSG00000145431	379.075	-0.736683	1.6891e-06	4	156760454	156971394	platelet derived growth factor C [Source:HGNC Symbol;Acc:HGNC:8801]	PDGFC	protein_coding	920.794	393.198	422.374	281.295	306.173	333.735	240.834	108.515	328.239	102.939	841.599	484.697	417.072	341.856	499.915	505.728	310.306	171.533	421.831	274.083	557.741	349.973	636.853	215.401	210.046	152.539	547.509	237.333
ENSG00000124380	172.041	-0.612011	1.71104e-06	2	69893560	69905575	small nuclear ribonucleoprotein U4/U6.U5 subunit 27 [Source:HGNC Symbol;Acc:HGNC:30240]	SNRNP27	protein_coding	190.817	131.786	250.296	151.881	241.863	146.275	148.623	124.623	162.113	101.519	183.273	135.646	224.846	88.0974	180.068	176.528	314.656	126.607	151.329	140.648	395.022	241.893	161.61	131.342	135.03	78.3685	197.66	104.739
ENSG00000061938	337.83	0.636085	1.73331e-06	3	195863364	195911945	tyrosine kinase non receptor 2 [Source:HGNC Symbol;Acc:HGNC:19297]	TNK2	protein_coding	228.169	329.105	159.415	319.939	132.815	262.017	566.285	592.595	323.424	543.091	189.656	619.479	222.516	393.565	231.869	263.599	195.754	325.367	365.082	400.306	217.316	349.973	260.219	323.627	406.243	572.37	231.995	433.439
ENSG00000118873	1464.71	-0.422551	1.74236e-06	1	220148293	220272454	RAB3 GTPase activating non-catalytic protein subunit 2 [Source:HGNC Symbol;Acc:HGNC:17168]	RAB3GAP2	protein_coding	1936.59	1237.21	1933.83	1697.65	1741.97	1398.85	935.13	871.513	1296.1	839.839	1498.1	1250.19	2162.25	1373.17	1526.88	1352.58	1953.19	1095.9	1668.41	1424.51	1795.26	1329.9	1807.84	1266.14	1441.47	1213.31	1872.67	1091.4
ENSG00000163083	26.8925	1.22883	1.74906e-06	2	120346143	120351808	inhibin beta B subunit [Source:HGNC Symbol;Acc:HGNC:6067]	INHBB	protein_coding	10.5558	106.581	4.46957	11.6832	13.9805	18.4619	23.8664	61.8876	5.61779	4.96946	8.20627	6.9119	9.32005	37.3456	17.2668	33.3971	11.6002	81.6822	5.67486	28.8509	6.42312	26.7626	28.7611	47.2831	11.541	19.5921	22.2716	88.025
ENSG00000156030	165.399	0.949891	1.74906e-06	14	73715122	73790285	ELM2 and Myb/SANT domain containing 1 [Source:HGNC Symbol;Acc:HGNC:19853]	ELMSAN1	protein_coding	126.67	254.931	64.8087	180.64	56.6211	166.868	122.587	215.335	151.68	357.091	121.27	513.209	67.5703	271.953	137.312	153.865	101.502	374.377	98.3642	120.813	46.0324	95.7278	101.349	115.581	214.663	141.343	75.1665	183.85
ENSG00000221978	404.787	0.412009	1.74906e-06	1	1385711	1399328	cyclin L2 [Source:HGNC Symbol;Acc:HGNC:20570]	CCNL2	protein_coding	394.626	620.763	410.455	491.592	324.348	389.121	278.803	335.719	300.953	590.656	425.814	488.153	354.162	446.232	325.603	370.947	390.058	541.825	272.393	385.88	254.784	340.709	335.546	449.715	373.928	496.8	393.464	550.992
ENSG00000198130	111.776	-0.525622	1.74906e-06	2	190189735	190344193	3-hydroxyisobutyryl-CoA hydrolase [Source:HGNC Symbol;Acc:HGNC:4908]	HIBCH	protein_coding	144.534	92.8984	150.475	113.237	155.184	99.4104	117.162	90.712	132.419	97.2594	164.125	89.8547	125.821	75.6488	106.89	81.1073	192.854	84.4049	90.7977	79.3399	147.732	104.992	89.0224	74.6023	84.2493	71.3713	160.541	113.095
ENSG00000156052	6077.01	-0.503497	1.76908e-06	9	77716087	78031458	G protein subunit alpha q [Source:HGNC Symbol;Acc:HGNC:4390]	GNAQ	protein_coding	7444.31	3970.87	8985.32	5847.87	6340.16	5917.76	2686.06	2903.63	4011.1	2355.52	9659.69	6775.39	8209.79	6501.01	8608.74	7318.74	8610.27	4371.36	7284.62	5642.15	8954.91	5848.66	6342.5	3578.81	5487.75	4465.6	7564.91	4468.66
ENSG00000162614	221.128	-0.863798	1.76908e-06	1	77888513	77943895	nexilin F-actin binding protein [Source:HGNC Symbol;Acc:HGNC:29557]	NEXN	protein_coding	241.972	231.166	204.11	101.554	276.115	64.6168	270.125	67.8221	30.4966	22.0076	227.04	53.5673	340.182	280.571	412.759	249.286	349.457	221.903	234.561	102.781	605.915	251.157	213.654	132.393	304.682	246.301	268.187	187.192
ENSG00000138439	77.1604	0.68259	1.78027e-06	2	202635188	202769757	family with sequence similarity 117 member B [Source:HGNC Symbol;Acc:HGNC:14440]	FAM117B	protein_coding	90.1307	156.271	60.3391	60.2132	32.1552	85.2089	67.2599	80.5387	79.4515	122.817	88.4454	147.742	54.7553	80.4367	38.6448	87.071	69.6014	103.464	34.0491	84.7494	27.8335	61.7599	79.4354	87.2111	50.7804	92.3629	51.967	85.7965
ENSG00000188215	134.171	-0.721819	1.81595e-06	16	20854925	20900384	defective in cullin neddylation 1 domain containing 3 [Source:HGNC Symbol;Acc:HGNC:28734]	DCUN1D3	protein_coding	124.234	92.8984	272.644	109.642	269.125	93.7298	99.8051	73.7565	76.2414	70.2824	331.898	167.614	243.486	117.782	192.402	82.3	224.755	91.2118	109.714	84.7494	205.54	122.49	80.805	53.5875	77.3247	74.1702	113.214	101.396
ENSG00000182885	2202.47	-0.80096	1.84626e-06	16	57668187	57689378	adhesion G protein-coupled receptor G3 [Source:HGNC Symbol;Acc:HGNC:13728]	ADGRG3	protein_coding	1990.18	1371.15	1331.19	841.188	2454.98	1026.77	953.572	1095.33	1223.87	857.587	4125.02	4667.26	7388.47	1987.94	4067.57	2374.77	3703.37	1497.51	2459.1	1233.37	2746.96	1944.41	2350.19	628.34	2004.67	1154.54	2915.72	1274.13
ENSG00000164106	5.1687	1.58824	1.85134e-06	4	173384701	173406380	stimulator of chondrogenesis 1 [Source:HGNC Symbol;Acc:HGNC:17036]	SCRG1	protein_coding	4.05994	27.3654	2.97971	15.278	1.39805	7.81082	0	3.3911	0	5.67938	1.82362	1.72798	0	14.3637	1.64446	5.96377	0	13.6137	0	1.80318	3.21156	5.14666	2.73915	9.45662	0	8.39662	1.85596	5.01408
ENSG00000115808	1550.98	-0.406528	1.85134e-06	2	36843640	36966472	striatin [Source:HGNC Symbol;Acc:HGNC:11424]	STRN	protein_coding	1606.92	1261.69	2520.09	1733.6	1818.17	1335.65	948.148	1177.56	1374.75	941.358	2507.47	1664.9	1879.15	1421.05	2455.18	1970.43	1755.99	1196.64	1657.06	1298.29	1529.77	1026.24	1327.12	1023.42	1531.49	1169.93	1998.87	1296.42
ENSG00000112658	225.144	-0.599521	1.87163e-06	6	43171299	43181507	serum response factor [Source:HGNC Symbol;Acc:HGNC:11291]	SRF	protein_coding	219.237	143.308	187.722	111.439	159.378	146.985	186.592	175.49	211.871	156.893	436.756	415.578	714.148	257.589	427.559	245.707	246.505	137.498	228.886	155.073	235.515	126.608	162.979	98.7692	210.046	132.947	229.211	143.737
ENSG00000117335	6099.92	0.667418	1.92818e-06	1	207752057	207795513	CD46 molecule [Source:HGNC Symbol;Acc:HGNC:6953]	CD46	protein_coding	5630.32	8148.41	4754.13	10415.1	3036.57	7082.99	3766.56	5063.76	3149.97	5451.5	3641.76	5494.1	2622.43	8384.57	5558.27	7092.12	3706.27	8982.32	4424.5	6010	5128.86	9269.13	7427.21	7489.65	7335.46	10490.2	5654.19	5587.36
ENSG00000108840	468.663	0.476622	1.93729e-06	17	44076746	44123702	histone deacetylase 5 [Source:HGNC Symbol;Acc:HGNC:14068]	HDAC5	protein_coding	341.035	633.005	336.707	354.989	237.669	364.268	555.437	589.204	367.564	472.809	400.284	783.637	470.662	781.385	430.026	566.558	346.557	495.539	383.999	402.109	259.066	393.205	369.785	508.556	498.571	750.098	442.647	587.204
ENSG00000172216	2826.65	-0.630607	2.0602e-06	20	50190734	50192689	CCAAT/enhancer binding protein beta [Source:HGNC Symbol;Acc:HGNC:1834]	CEBPB	protein_coding	2924.78	2339.74	6727.44	2491.21	5383.9	2324.78	1276.85	1568.38	1703.79	1020.87	4730.46	3888.81	3817.72	2445.66	3499.41	1988.32	3506.17	2364.7	2850.67	1963.66	2731.97	2125.57	2016.02	1237.77	3387.28	2376.24	4577.73	1876.38
ENSG00000143549	8743.38	-0.455182	2.30617e-06	1	154155304	154194648	tropomyosin 3 [Source:HGNC Symbol;Acc:HGNC:12012]	TPM3	protein_coding	10982.1	7300.81	11914.4	8906.17	10901.3	8565.63	6857.26	7674.91	5759.03	4443.41	9198.32	8330.57	12449.3	6977.89	11335.3	8596.18	11371.1	6847.69	10918.4	9145.72	10687	7120.92	8292.78	5222.16	9565.18	7193.11	11873.5	6384.6
ENSG00000175928	272.087	-0.941708	2.35627e-06	3	3799437	3847703	leucine rich repeat neuronal 1 [Source:HGNC Symbol;Acc:HGNC:20980]	LRRN1	protein_coding	361.335	160.592	299.461	149.185	235.572	73.1377	57.4964	82.2342	275.272	63.1831	528.849	324.859	1116.08	198.219	508.138	342.32	401.658	138.86	285.634	216.381	518.132	187.338	254.741	128.19	148.879	90.9634	231.067	240.676
ENSG00000101596	13488.4	0.518988	2.39478e-06	18	2655738	2805017	structural maintenance of chromosomes flexible hinge domain containing 1 [Source:HGNC Symbol;Acc:HGNC:29090]	SMCHD1	protein_coding	13883.4	17390.7	11283.4	15349	8675.61	13432.5	8322.87	11270.3	7730.07	11434.7	7309.97	10143.2	7368.66	19417.8	18179.5	18373.2	12075.8	20100.6	11302.4	16443.2	8658.37	17125	12994.5	17288.8	14924.8	19874.8	13104	14216.6
ENSG00000162413	440.159	0.609085	2.4765e-06	1	6590724	6614607	kelch like family member 21 [Source:HGNC Symbol;Acc:HGNC:29041]	KLHL21	protein_coding	367.019	664.692	318.084	468.225	197.125	315.273	362.336	763.846	280.889	403.236	307.279	806.101	390.277	610.936	499.093	516.462	301.606	599.003	365.082	436.369	214.104	479.668	384.851	410.838	465.102	528.987	377.689	490.266
ENSG00000164821	594.07	1.41118	2.48601e-06	8	6935822	6938338	defensin alpha 4 [Source:HGNC Symbol;Acc:HGNC:2763]	DEFA4	protein_coding	21.9237	289.497	2.97971	12.5819	28.6601	470.779	1412.46	1475.98	375.589	1840.12	64.7384	573.688	15.1451	288.232	20.5557	194.419	18.8504	38.1184	2209.41	2125.95	10.7052	79.2585	36.9785	367.758	200.813	509.395	1007.79	2941.59
ENSG00000154642	864.701	-0.467886	2.49166e-06	21	17788967	17819386	chromosome 21 open reading frame 91 [Source:HGNC Symbol;Acc:HGNC:16459]	C21orf91	protein_coding	1012.55	657.49	973.62	737.837	733.278	620.605	594.491	639.223	498.378	410.335	1085.05	839.796	823.659	684.67	1543.32	896.951	1254.28	733.778	1117.95	843.888	1511.58	731.855	720.397	558.992	1232.58	836.864	1168.33	749.884
ENSG00000135048	3633.06	-0.561439	2.54796e-06	9	71683366	71816690	transmembrane protein 2 [Source:HGNC Symbol;Acc:HGNC:11869]	TMEM2	protein_coding	5220.27	3494.13	4958.98	4022.6	4052.25	3195.34	1765.03	1855.78	3097.81	1675.42	4360.27	5077.66	4341.98	2375.76	4126.77	3135.75	5718.92	3098.48	4834.98	2991.47	5572.06	3505.9	3712.92	1818.82	3810.84	2285.28	5076.99	2543.25
ENSG00000115816	564.524	-0.547211	2.56665e-06	2	37201612	37231713	CCAAT/enhancer binding protein zeta [Source:HGNC Symbol;Acc:HGNC:24218]	CEBPZ	protein_coding	485.569	455.13	647.342	394.532	1082.79	462.259	560.861	357.761	587.46	352.832	639.177	330.907	902.879	526.669	853.474	496.186	900.468	521.405	620.451	521.119	606.985	438.495	557.417	505.404	429.325	391.842	615.252	562.691
ENSG00000054523	2248.34	-0.672565	2.65473e-06	1	10210805	10381603	kinesin family member 1B [Source:HGNC Symbol;Acc:HGNC:16636]	KIF1B	protein_coding	3183.8	2032.24	1548.7	1382.21	2311.68	1360.5	1412.46	1005.46	1663.67	1086.89	2705.33	3462	6365.59	2386.29	4185.97	2168.43	4354.44	2225.84	2979.3	1328.94	2644.19	1519.29	2000.95	784.9	1867.33	1041.18	1980.31	1965.52
ENSG00000100228	13.1988	1.22332	2.66023e-06	22	23145326	23164350	RAB36, member RAS oncogene family [Source:HGNC Symbol;Acc:HGNC:9775]	RAB36	protein_coding	10.5558	27.3654	6.70435	18.8728	2.7961	8.52089	15.1877	21.1944	3.21016	14.1985	10.0299	60.4792	10.4851	22.0243	7.40006	14.313	4.35009	24.5047	5.67486	9.01589	4.28208	10.2933	9.58703	14.7103	4.6164	8.39662	1.85596	18.9421
ENSG00000005020	2014.23	-0.504986	2.70691e-06	7	26667062	26995239	src kinase associated phosphoprotein 2 [Source:HGNC Symbol;Acc:HGNC:15687]	SKAP2	protein_coding	3360.01	1691.62	2756.23	1726.41	2013.89	1467.72	1059.89	897.794	978.297	716.312	2991.64	3552.72	3340.07	2191.9	4978.6	2696.82	2486.8	1669.04	1623.01	1031.42	2502.88	1770.45	2289.93	1252.48	1799.24	1295.88	1165.55	1091.96
ENSG00000113282	1947.81	-0.847745	2.71e-06	5	157785743	157859175	clathrin interactor 1 [Source:HGNC Symbol;Acc:HGNC:23186]	CLINT1	protein_coding	2649.52	1200.48	2286.18	1854.03	2909.35	1485.48	1337.6	1573.47	2242.3	983.243	1944.89	1587.15	4185.87	983.435	1895.24	1416.99	4119.53	1082.29	2355.07	1325.34	4667.47	1200.2	2284.45	1151.61	1212.96	1024.39	2183.54	1396.7
ENSG00000241878	707.845	0.664078	2.94219e-06	22	31618491	31662432	phosphatidylserine decarboxylase [Source:HGNC Symbol;Acc:HGNC:8999]	PISD	protein_coding	728.353	1254.49	817.931	1389.4	503.998	739.188	406.814	1039.37	325.832	879.594	655.59	1254.51	674.538	938.428	396.315	577.293	558.261	1174.86	391.565	530.135	277.265	668.036	576.591	493.846	637.063	691.322	579.989	659.073
ENSG00000172232	89.4459	1.19505	2.95956e-06	19	825097	832018	azurocidin 1 [Source:HGNC Symbol;Acc:HGNC:913]	AZU1	protein_coding	6.4959	54.0107	7.44928	10.7845	23.0678	36.2138	256.022	475.602	43.3372	375.549	20.9716	170.206	6.99003	22.9819	11.5112	38.1681	13.0503	34.0342	249.694	225.397	17.1283	9.26398	8.21745	29.4206	25.3902	65.7736	56.6069	211.148
ENSG00000170242	1293.7	-0.414129	2.95956e-06	11	11841423	11959323	ubiquitin specific peptidase 47 [Source:HGNC Symbol;Acc:HGNC:20076]	USP47	protein_coding	1305.68	1002.44	1647.04	1193.48	1762.24	1329.26	1089.18	1179.26	1215.85	930.709	1739.73	1049.75	1516.84	919.277	1826.17	1517.18	1506.58	935.261	1326.02	1197.31	1622.91	1186.82	1343.55	871.06	1244.12	1108.35	1584.99	1072.46
ENSG00000125633	1035.8	-0.463273	3.06786e-06	2	117915478	118014133	coiled-coil domain containing 93 [Source:HGNC Symbol;Acc:HGNC:25611]	CCDC93	protein_coding	1127.85	872.813	1219.45	960.716	1190.44	890.433	667.175	506.122	1015.21	753.228	1124.26	1009.14	1812.75	910.659	1262.12	821.808	1757.44	782.788	1242.79	822.25	1178.64	930.516	899.811	715.551	998.297	873.249	1456.93	1200.04
ENSG00000257878	45.2006	1.29433	3.24116e-06	12	95996521	96011489		RP11-256L6.3	antisense	25.9836	80.656	27.5623	44.9353	67.1065	27.6929	10.8484	27.9766	7.22287	61.7633	16.4125	31.1036	8.15504	128.316	44.4004	71.5652	30.4506	183.785	5.67486	57.7017	4.28208	34.9973	24.6524	98.7692	16.1574	53.1786	26.9115	47.3552
ENSG00000196396	1151.92	-0.65002	3.24754e-06	20	50510321	50585241	protein tyrosine phosphatase, non-receptor type 1 [Source:HGNC Symbol;Acc:HGNC:9642]	PTPN1	protein_coding	1531.41	800.799	1163.58	941.843	1173.66	899.664	820.137	807.082	1001.57	610.534	1538.22	1627.75	1776.63	612.851	1632.95	1245.24	1405.08	631.676	1344.94	980.929	1850.93	1170.35	1064.16	438.157	1206.03	772.489	2209.52	995.573
ENSG00000279447	15.647	1.38881	3.33723e-06	20	23071547	23072722		RP4-737E23.6	TEC	12.9918	29.5259	2.97971	17.0754	4.89318	14.2015	7.59386	6.78221	2.40762	69.5724	8.20627	17.2798	5.82503	59.37	4.93338	9.54203	14.5003	42.2025	0	12.6223	2.14104	6.17599	6.84788	7.35515	4.6164	9.79606	7.42385	51.255
ENSG00000204257	169.759	0.66164	3.33723e-06	6	32948613	32969094	major histocompatibility complex, class II, DM alpha [Source:HGNC Symbol;Acc:HGNC:4934]	HLA-DMA	protein_coding	85.2587	123.144	111.739	141.995	104.155	240.715	175.744	192.445	457.448	479.198	92.0926	165.022	64.0753	161.831	102.779	196.804	178.354	217.819	49.1821	108.191	74.9364	207.925	102.718	174.422	188.118	236.505	123.422	197.22
ENSG00000084734	20.4948	-1.40598	3.35326e-06	2	27496842	27523684	glucokinase regulator [Source:HGNC Symbol;Acc:HGNC:4196]	GCKR	protein_coding	60.8991	7.92157	17.1333	3.59482	5.59221	0.710075	30.3755	5.93443	2.40762	0	25.5306	0.863988	12.8151	11.491	49.3338	10.7348	0	8.16822	30.2659	3.60636	65.3018	46.3199	50.6743	7.35515	55.3968	15.3938	37.1193	8.91392
ENSG00000138434	3012.56	-0.305514	3.55581e-06	2	181891833	181930738	sperm specific antigen 2 [Source:HGNC Symbol;Acc:HGNC:11319]	SSFA2	protein_coding	3614.16	3180.15	3008.76	2572.99	2847.13	2323.36	2017.8	1733.7	2004.75	1472.38	3269.74	2482.24	3637.15	3324.72	4852.8	3883.61	3649.72	2367.42	3071.99	2600.18	4017.66	3650.01	3329.44	2774.99	3268.41	2741.5	3991.25	2663.59
ENSG00000049323	1252.47	-0.70975	3.55581e-06	2	32946972	33399509	latent transforming growth factor beta binding protein 1 [Source:HGNC Symbol;Acc:HGNC:6714]	LTBP1	protein_coding	1369.01	1016.84	862.626	963.412	1391.06	466.519	2324.81	1126.69	193.412	141.275	1540.96	470.009	2163.42	929.81	1749.7	842.084	1320.98	952.959	1579.5	706.846	1767.43	1159.03	2192.69	1648.6	2000.06	1735.3	1363.21	1090.84
ENSG00000173930	1345.81	-0.693508	3.5664e-06	5	102233986	102296549	solute carrier organic anion transporter family member 4C1 [Source:HGNC Symbol;Acc:HGNC:23612]	SLCO4C1	protein_coding	2500.92	1310.66	1841.46	1126.98	1569.31	994.814	727.926	1038.53	958.234	355.671	1125.17	1054.93	2404.57	841.713	1834.39	1282.21	2147.49	1163.97	2188.6	1768.92	1876.62	1008.74	2021.49	829.031	888.657	549.979	1430.95	840.694
ENSG00000264112	64.4741	0.954031	3.58946e-06	17	57989039	57994850		RP11-159D12.2	lincRNA	63.3351	98.6596	26.8174	62.9094	25.1649	53.2556	52.0722	46.6277	42.5347	171.091	93.9162	129.598	24.4651	135.976	47.6893	67.987	56.5511	153.835	34.0491	46.8827	19.2694	28.8213	24.6524	47.2831	35.7771	58.7764	26.9115	130.366
ENSG00000131584	76.9333	0.724917	3.58946e-06	1	1292376	1309609	ArfGAP with coiled-coil, ankyrin repeat and PH domains 3 [Source:HGNC Symbol;Acc:HGNC:16754]	ACAP3	protein_coding	54.4032	115.223	44.6957	67.4029	48.9318	68.8772	93.296	79.6909	111.553	202.328	77.5037	100.223	38.4452	91.9277	35.3559	54.8667	44.9509	83.0436	35.9408	66.7176	52.4555	79.2585	39.7177	99.8199	77.3247	106.357	44.5431	139.28
ENSG00000116991	2404.3	-0.711401	3.60613e-06	1	232397965	232561558	signal induced proliferation associated 1 like 2 [Source:HGNC Symbol;Acc:HGNC:23800]	SIPA1L2	protein_coding	3165.13	2204.36	3942.9	2569.4	5804.71	1811.4	935.13	1308.97	1016.82	618.343	3808.62	1987.17	3899.27	2195.73	3180.38	2242.38	5169.35	2784	2706.91	2322.49	2239.53	1400.92	2266.65	658.811	1257.97	852.257	3304.54	1666.35
ENSG00000129682	234.523	-1.05647	3.64288e-06	X	138614731	139222777	fibroblast growth factor 13 [Source:HGNC Symbol;Acc:HGNC:3670]	FGF13	protein_coding	428.73	98.6596	235.397	125.819	118.834	157.637	20.6119	30.5199	251.998	39.0458	620.03	432.858	311.057	96.7156	587.894	341.128	102.952	76.2367	18.9162	1.80318	661.582	317.034	465.656	123.987	382.007	142.743	315.514	61.2832
ENSG00000179921	40.1217	0.978371	3.65376e-06	2	218259496	218263859	G protein-coupled bile acid receptor 1 [Source:HGNC Symbol;Acc:HGNC:19680]	GPBAR1	protein_coding	21.1117	50.41	16.3884	53.0236	30.7571	106.511	18.4422	56.801	27.2864	44.7251	15.5007	61.3431	41.9402	54.5821	18.089	29.8189	34.8007	96.6573	13.2413	27.0477	11.7757	45.2906	21.9132	54.6383	48.4722	43.3826	42.6872	36.7699
ENSG00000080824	3880.39	-0.791813	3.65376e-06	14	102080738	102139699	heat shock protein 90 alpha family class A member 1 [Source:HGNC Symbol;Acc:HGNC:5253]	HSP90AA1	protein_coding	3103.42	3030.36	11505.4	6386.2	14774.6	3211.67	4142.99	3791.25	2418.06	2160.3	4703.11	3140.6	5992.79	1665.23	4005.08	2903.16	6696.23	2642.42	3219.54	1574.18	3522.01	1336.07	1433.95	975.083	2708.67	1890.64	3549.53	2168.31
ENSG00000166091	284.225	-0.835984	3.68224e-06	14	23376808	23379772	CKLF like MARVEL transmembrane domain containing 5 [Source:HGNC Symbol;Acc:HGNC:19176]	CMTM5	protein_coding	377.574	343.508	263.704	142.894	390.056	74.5578	425.256	184.815	31.2991	9.93892	240.717	120.094	406.587	229.819	288.602	137.167	169.653	151.112	541.003	122.616	638.03	426.143	488.938	346.743	408.551	324.669	390.68	283.574
ENSG00000135250	959.83	0.555911	3.68389e-06	7	105110704	105399308	SRSF protein kinase 2 [Source:HGNC Symbol;Acc:HGNC:11306]	SRPK2	protein_coding	1067.76	1428.04	880.504	1074.85	620.036	1055.88	624.866	1074.13	627.587	964.075	674.738	1365.1	608.133	1422.01	1424.1	1507.64	932.369	1272.88	705.574	861.92	320.086	754.5	1034.03	1057.04	864.421	1167.13	627.316	858.522
ENSG00000090382	34920	0.672017	3.77377e-06	12	69348341	69354234	lysozyme [Source:HGNC Symbol;Acc:HGNC:6740]	LYZ	protein_coding	15649.4	28849.6	15354.4	42855.7	57362.7	56921	48313.2	61084.8	52998.2	52696.9	9932.33	27905.1	9444.7	20335.2	17476.5	30946	21693.9	24096.2	40159.1	61151.2	26446.1	66266.3	15800.8	27706.9	48132.9	62518.5	14012.5	21650.8
ENSG00000134248	1101.19	-0.82228	3.77377e-06	1	110401249	110407942	late endosomal/lysosomal adaptor, MAPK and MTOR activator 5 [Source:HGNC Symbol;Acc:HGNC:17955]	LAMTOR5	protein_coding	1390.12	922.503	1550.19	1144.05	2039.76	1028.19	770.235	1281.84	728.707	403.236	1455.25	971.122	1907.11	468.257	1543.32	1069.9	1603.73	803.208	1891.62	1246	1518	583.631	1062.79	379.316	766.323	432.426	1477.35	394.998
ENSG00000074416	228.506	-0.752224	3.79528e-06	3	127689062	127823250	monoglyceride lipase [Source:HGNC Symbol;Acc:HGNC:17038]	MGLL	protein_coding	218.425	253.49	134.087	75.4912	125.825	49.7052	272.294	180.576	66.6109	61.7633	283.572	116.638	573.183	164.704	490.871	225.431	166.753	111.632	185.379	70.324	385.387	284.096	424.568	178.625	536.657	387.644	205.084	169.364
ENSG00000175003	23.4631	1.17144	3.8239e-06	6	160121789	160158718	solute carrier family 22 member 1 [Source:HGNC Symbol;Acc:HGNC:10963]	SLC22A1	protein_coding	20.2997	40.328	9.68406	28.7586	10.4854	29.1131	31.4603	28.8244	8.82795	60.3434	5.47085	44.9274	12.8151	34.4729	13.1557	17.8913	34.8007	73.514	7.56647	21.6381	1.07052	11.3226	8.21745	17.8625	16.1574	18.1927	7.42385	42.3411
ENSG00000068976	25.7822	1.01129	3.8239e-06	11	64746389	64760297	phosphorylase, glycogen, muscle [Source:HGNC Symbol;Acc:HGNC:9726]	PYGM	protein_coding	29.2316	60.492	12.6638	20.6702	18.1747	14.9116	17.3574	33.911	12.0381	42.5954	12.7653	44.0634	9.32005	50.7517	9.04452	16.6986	37.7008	78.9594	5.67486	16.2286	7.49364	20.5866	12.3262	28.3699	28.8525	32.1871	12.0638	36.7699
ENSG00000104412	661.653	-0.513476	3.83106e-06	8	108443601	108486918	ER membrane protein complex subunit 2 [Source:HGNC Symbol;Acc:HGNC:28963]	EMC2	protein_coding	1016.61	596.278	801.542	666.839	748.657	538.236	400.305	334.024	456.646	268.351	751.33	377.563	949.48	636.791	814.007	665.557	994.72	578.582	839.879	724.878	1300.68	636.127	645.07	500.15	520.499	583.565	733.106	446.81
ENSG00000135378	410.484	0.851469	3.88218e-06	11	32829943	32858123	proline rich and Gla domain 4 [Source:HGNC Symbol;Acc:HGNC:30799]	PRRG4	protein_coding	498.561	1068.69	221.244	452.947	187.339	472.91	199.61	261.115	169.336	206.588	103.034	298.94	75.7254	415.59	158.69	390.031	385.708	1094.54	234.561	340.801	360.765	680.388	636.853	748.124	444.329	857.855	313.658	215.605
ENSG00000169704	406.434	-0.866385	3.88218e-06	3	129060767	129062406	glycoprotein IX platelet [Source:HGNC Symbol;Acc:HGNC:4444]	GP9	protein_coding	318.299	376.635	214.539	108.743	464.852	91.5996	896.076	284.005	30.4966	15.6183	374.753	165.886	816.669	340.898	454.693	156.251	281.306	181.062	552.353	151.467	793.256	548.634	801.202	585.26	610.519	537.384	661.651	566.034
ENSG00000082781	473.048	-0.902512	3.88218e-06	3	124761948	124901418	integrin subunit beta 5 [Source:HGNC Symbol;Acc:HGNC:6160]	ITGB5	protein_coding	369.455	337.747	255.51	196.816	446.677	161.897	1298.55	457.799	114.763	45.4351	628.236	152.062	918.024	238.437	693.962	274.333	448.059	337.62	535.328	120.813	782.551	416.879	824.485	561.093	634.755	850.858	657.939	485.252
ENSG00000114354	405.333	-0.531235	3.97225e-06	3	100709331	100748966	TRK-fused gene [Source:HGNC Symbol;Acc:HGNC:11758]	TFG	protein_coding	362.959	302.46	607.861	461.934	650.094	348.647	243.004	284.005	423.742	318.045	552.556	313.628	513.767	234.607	552.538	390.031	546.661	310.392	431.289	337.194	540.613	362.325	372.525	314.17	488.184	352.658	481.623	251.818
ENSG00000182400	692.848	-0.386437	4.13155e-06	14	39147811	39170532	trafficking protein particle complex 6B [Source:HGNC Symbol;Acc:HGNC:23066]	TRAPPC6B	protein_coding	930.538	607.8	932.649	700.99	984.927	654.689	426.341	392.52	523.257	400.396	626.412	508.025	1010.06	646.366	741.651	619.039	1041.12	658.903	631.801	618.49	1027.7	866.697	777.919	597.869	594.362	545.781	814.768	518.679
ENSG00000103769	1432.83	-0.3075	4.23649e-06	15	65726054	65891991	RAB11A, member RAS oncogene family [Source:HGNC Symbol;Acc:HGNC:9760]	RAB11A	protein_coding	1831.03	1667.85	1854.12	1457.7	1595.88	1109.85	1266.01	1188.58	977.495	729.801	1377.74	1303.76	1819.74	1459.35	1913.33	1643.62	1628.38	1278.33	1483.03	1081.91	1885.19	1356.66	1575.01	1406.94	1468.02	1179.73	1494.98	1085.27
ENSG00000104689	201.639	-0.932684	4.23649e-06	8	23190452	23225126	TNF receptor superfamily member 10a [Source:HGNC Symbol;Acc:HGNC:11904]	TNFRSF10A	protein_coding	131.542	135.387	367.249	110.541	581.589	127.103	124.756	127.166	246.38	151.214	301.808	116.638	602.308	127.358	90.4452	62.0232	323.357	103.464	187.27	128.026	393.952	122.49	109.566	117.682	173.115	90.9634	296.954	195.549
ENSG00000168421	302.731	-0.98252	4.29424e-06	4	40191053	40246967	ras homolog family member H [Source:HGNC Symbol;Acc:HGNC:686]	RHOH	protein_coding	199.749	86.4171	552.736	212.094	542.444	164.027	238.664	257.724	215.081	232.145	949.192	216.861	519.593	109.164	258.18	145.516	598.862	212.374	404.806	247.036	755.788	134.842	136.958	174.422	208.892	144.142	363.769	194.992
ENSG00000105011	40.6598	0.923904	4.32123e-06	19	14119509	14136956	anti-silencing function 1B histone chaperone [Source:HGNC Symbol;Acc:HGNC:20996]	ASF1B	protein_coding	10.5558	52.5704	27.5623	65.6055	19.5727	32.6634	61.8357	84.7776	31.2991	85.9007	16.4125	65.6631	25.6301	67.9882	28.778	46.5174	18.8504	34.0342	35.9408	23.4413	28.9041	40.1439	17.8045	54.6383	34.623	46.1814	25.9835	54.5978
ENSG00000185215	1162.27	0.956483	4.56355e-06	14	103123442	103137439	TNF alpha induced protein 2 [Source:HGNC Symbol;Acc:HGNC:11895]	TNFAIP2	protein_coding	450.653	1416.52	706.191	1385.8	299.183	786.052	1311.57	1219.1	631.6	2986.65	750.418	2890.04	349.502	1868.24	700.539	734.736	475.61	857.663	616.668	492.268	558.812	1554.29	583.439	1126.39	2610.57	2707.91	709.906	1763.28
ENSG00000187688	440.435	-0.880835	4.62845e-06	17	16415542	16437003	transient receptor potential cation channel subfamily V member 2 [Source:HGNC Symbol;Acc:HGNC:18082]	TRPV2	protein_coding	476.637	245.569	995.968	437.669	1103.76	342.256	279.888	608.703	467.881	309.526	665.62	452.73	853.949	164.704	356.848	187.262	624.963	235.517	383.999	230.807	661.582	268.656	397.177	199.64	361.233	246.301	532.662	240.676
ENSG00000012779	9561.94	-0.613734	4.6503e-06	10	45374176	45446119	arachidonate 5-lipoxygenase [Source:HGNC Symbol;Acc:HGNC:435]	ALOX5	protein_coding	15477.3	7992.14	14091.1	10072.7	10588.8	9692.52	4036.68	5794.55	8689.11	4870.07	14009.9	12286.8	14632.5	6104.57	7918.07	4994.06	15806.8	9023.16	11851	6464.4	14282.9	7367.96	7702.49	5137.05	10944.3	7184.71	13920.7	6797.98
ENSG00000115091	12557.6	-0.417233	4.75606e-06	2	113889960	113962596	ARP3 actin related protein 3 homolog [Source:HGNC Symbol;Acc:HGNC:170]	ACTR3	protein_coding	17335.9	10301.6	16142.6	13547.1	17677	13322.4	7206.58	7896.18	8139.37	5897.33	11102.2	10250.4	17338.8	12627.6	13231.3	10681.1	16244.7	10085	15677.7	12223.8	16190.6	12555.8	16255.5	11297.5	12965.2	9380.43	16962.6	9077.71
ENSG00000118508	1753.43	-0.523897	4.75768e-06	6	146543693	146554965	RAB32, member RAS oncogene family [Source:HGNC Symbol;Acc:HGNC:9772]	RAB32	protein_coding	2164.76	1289.78	2113.36	1427.14	2329.15	1650.92	1089.18	834.211	1683.73	638.931	1933.03	1640.71	1664.79	1617.35	1947.86	1594.71	2131.54	1086.37	2833.64	2367.57	2647.4	2004.11	2091.34	1527.77	1533.8	1164.33	2688.36	1400.04
ENSG00000197461	101.309	-1.01373	4.89687e-06	7	497258	520296	platelet derived growth factor subunit A [Source:HGNC Symbol;Acc:HGNC:8799]	PDGFA	protein_coding	119.362	120.264	92.371	42.2391	166.368	14.9116	201.78	62.7354	16.0508	11.3588	72.0328	38.0155	161.936	49.7942	124.157	31.0116	178.354	69.4299	121.064	52.2922	306.169	93.6692	167.088	125.038	105.023	86.7651	107.646	99.7245
ENSG00000075420	3302.21	-0.641574	4.92855e-06	3	172039628	172401665	fibronectin type III domain containing 3B [Source:HGNC Symbol;Acc:HGNC:24670]	FNDC3B	protein_coding	4400.97	2552.91	4562.68	3248.82	5934.03	3190.36	1280.11	1854.09	1906.84	1703.81	4289.15	4486.69	4376.93	2349.9	4186.79	2113.56	7241.45	3363.94	4301.54	2565.92	4308.85	2541.42	2789.83	1414.29	3456.53	1866.85	4267.79	1905.91
ENSG00000204634	1675.42	-0.678399	5.16336e-06	2	101007617	101252866	TBC1 domain family member 8 [Source:HGNC Symbol;Acc:HGNC:17791]	TBC1D8	protein_coding	2415.66	1097.5	2011.3	2075.11	4006.82	1596.25	623.782	690.089	926.935	541.671	2837.55	2430.4	3025.52	1653.74	1669.95	1065.13	2670.95	943.429	1851.89	1509.26	2465.41	1390.63	1205.23	430.802	1399.92	979.606	2026.71	1370.52
ENSG00000181690	85.914	-0.767161	5.16755e-06	8	56160904	56211324	PLAG1 zinc finger [Source:HGNC Symbol;Acc:HGNC:9045]	PLAG1	protein_coding	67.395	54.7308	170.588	61.1119	157.98	56.806	58.5812	55.9532	117.171	46.8549	129.477	63.9351	154.946	77.564	111.823	78.7218	152.253	46.2866	73.7731	77.5367	153.084	72.0532	87.6528	65.1456	53.0886	43.3826	68.6707	49.0266
ENSG00000267321	42.3537	0.770004	5.47374e-06	17	35568120	35574792		RP11-1094M14.11	lincRNA	40.5994	49.6898	38.7362	64.7068	23.7669	63.1966	27.1209	55.9532	38.522	35.4961	17.3244	38.8795	22.1351	46.9214	25.4891	48.9029	20.3004	47.6479	26.4827	46.8827	32.1156	85.4345	41.0873	50.4353	36.9312	72.7707	37.1193	51.255
ENSG00000158869	9235.92	-0.611558	5.47374e-06	1	161215234	161220699	Fc fragment of IgE receptor Ig [Source:HGNC Symbol;Acc:HGNC:3611]	FCER1G	protein_coding	9704.07	5279.37	11366.1	10182.3	12079.2	9331.8	6693.45	6243.87	5840.09	3186.13	9097.11	9865.01	15453.8	7924.93	13152.4	10215.9	12932.8	5813.05	12577.4	8799.51	12004.8	9162.08	7964.08	4117.83	8931.58	5103.75	18972.6	6610.79
ENSG00000222041	196.688	-0.566282	5.48799e-06	2	87455368	87606805	cytoskeleton regulator RNA [Source:HGNC Symbol;Acc:HGNC:28717]	CYTOR	lincRNA	254.964	192.998	262.215	197.715	278.911	166.157	138.859	173.794	127.604	69.5724	252.571	158.974	150.286	131.188	208.846	110.926	408.908	171.533	259.152	205.562	352.201	195.573	186.262	127.139	225.05	145.541	217.148	137.609
ENSG00000123353	329.958	-0.560985	5.49283e-06	12	55817919	55821879	ORMDL sphingolipid biosynthesis regulator 2 [Source:HGNC Symbol;Acc:HGNC:16037]	ORMDL2	protein_coding	350.779	189.398	609.351	354.09	518.677	342.966	238.664	276.375	417.321	198.778	345.575	243.645	612.793	261.419	330.536	214.696	317.556	205.567	264.827	229.004	400.375	334.533	287.611	265.836	379.699	253.298	497.398	298.059
ENSG00000261596	252.398	-0.755515	5.49283e-06	16	21626742	21627569		CTB-31N19.3	sense_intronic	271.204	136.827	405.241	163.564	578.793	153.376	137.774	75.452	118.776	92.9999	242.541	170.206	323.872	257.589	203.091	175.335	629.313	171.533	329.142	223.594	382.176	306.741	297.198	184.93	159.266	156.737	502.038	217.834
ENSG00000163430	350.125	-0.844445	5.49283e-06	3	120392293	120451253	follistatin like 1 [Source:HGNC Symbol;Acc:HGNC:3972]	FSTL1	protein_coding	492.065	448.649	210.815	173.45	109.747	63.1966	515.298	164.468	89.082	21.2977	589.028	121.822	346.007	364.838	424.27	249.286	192.854	72.1526	314.009	109.994	775.057	362.325	1064.16	628.34	578.204	439.423	510.39	373.27
ENSG00000205213	121.062	-1.41845	5.57158e-06	11	27365961	27472775	leucine rich repeat containing G protein-coupled receptor 4 [Source:HGNC Symbol;Acc:HGNC:13299]	LGR4	protein_coding	51.9672	40.328	537.838	62.9094	153.786	51.8354	31.4603	24.5855	27.2864	16.3282	593.587	185.757	276.106	22.9819	19.7335	15.5058	146.453	12.2523	58.6402	21.6381	570.588	32.9386	50.6743	35.725	21.9279	26.5893	280.25	20.0563
ENSG00000023909	996.985	-0.694382	5.60736e-06	1	93885205	93909456	glutamate-cysteine ligase modifier subunit [Source:HGNC Symbol;Acc:HGNC:4312]	GCLM	protein_coding	1523.29	689.897	1270.1	702.787	1199.53	690.902	567.37	971.551	745.56	248.473	615.47	564.184	1363.06	676.051	1308.17	828.964	1650.13	682.046	1808.39	1116.17	2074.67	1315.49	1365.47	810.117	916.356	575.169	1016.14	620.075
ENSG00000149091	266.627	0.687431	5.63805e-06	11	46332905	46380554	diacylglycerol kinase zeta [Source:HGNC Symbol;Acc:HGNC:2857]	DGKZ	protein_coding	163.21	220.364	73.7478	152.78	65.0094	175.388	377.524	254.333	315.399	620.473	196.951	465.689	295.911	494.111	197.335	286.261	150.803	279.081	157.004	207.366	170.213	295.418	223.241	322.576	341.614	436.624	146.621	380.513
ENSG00000100644	5720.05	-0.590487	5.63805e-06	14	61695513	61748259	hypoxia inducible factor 1 alpha subunit [Source:HGNC Symbol;Acc:HGNC:4910]	HIF1A	protein_coding	5174.8	3876.53	7295.82	4779.31	11663.9	5148.75	3108.06	3716.65	3343.39	2327.84	8815.36	5386.96	5950.85	5135.5	11015.4	4565.86	8060.71	4122.23	7053.85	5256.27	7024.76	5407.08	5050.99	3374.96	6011.71	4976.4	8790.77	3726.58
ENSG00000172725	272.212	0.607352	5.64475e-06	11	67435510	67443821	coronin 1B [Source:HGNC Symbol;Acc:HGNC:2253]	CORO1B	protein_coding	125.858	267.173	236.142	300.168	216.698	421.074	322.197	283.157	317.806	409.625	191.48	296.348	163.101	329.408	126.623	180.106	159.503	187.869	79.448	191.137	189.482	475.551	154.762	246.923	414.322	554.177	340.569	441.239
ENSG00000169429	186.309	-1.51718	5.64475e-06	4	73740506	73743716	C-X-C motif chemokine ligand 8 [Source:HGNC Symbol;Acc:HGNC:6025]	CXCL8	protein_coding	30.8555	12.9626	683.099	60.2132	43.3396	22.0123	121.502	41.541	81.8592	42.5954	972.899	31.9676	97.8605	22.9819	1554.84	28.6261	116.002	13.6137	170.246	18.0318	28.9041	59.7012	15.0653	33.6236	493.955	176.329	212.508	29.5274
ENSG00000240370	16.7335	-1.02042	5.6898e-06	12	6873389	6884741		U47924.6	transcribed_processed_pseudogene	12.1798	6.48128	37.2464	12.5819	35.6503	13.4914	11.9332	11.8689	37.7194	10.6488	20.0598	9.50387	31.4552	6.70306	21.378	9.54203	24.6505	9.52959	7.56647	9.01589	29.9746	11.3226	16.4349	12.6088	18.4656	11.1955	20.4156	8.91392
ENSG00000145244	49.4786	1.38757	5.70438e-06	4	47593998	47838106	corin, serine peptidase [Source:HGNC Symbol;Acc:HGNC:19012]	CORIN	protein_coding	6.4959	5.041	17.1333	188.728	2.7961	13.4914	4.33935	4.23888	0.802541	12.0687	20.9716	52.7033	1.16501	6.70306	13.1557	20.2768	20.3004	570.414	5.67486	43.2763	6.42312	6.17599	6.84788	9.45662	62.3214	272.89	6.49587	5.01408
ENSG00000279369	78.1974	0.728814	5.86474e-06	17	63700847	63702670		RP11-51F16.1	TEC	66.583	82.0963	35.0116	80.8835	30.0581	88.7593	80.278	125.471	124.394	127.786	33.7369	86.3988	39.6102	112.037	55.0894	73.9507	53.6511	78.9594	52.9653	99.1748	32.1156	74.1119	69.8484	126.088	96.9444	107.757	64.9587	90.8106
ENSG00000242247	1034.73	-0.451647	6.20956e-06	22	42796502	42858106	ADP ribosylation factor GTPase activating protein 3 [Source:HGNC Symbol;Acc:HGNC:661]	ARFGAP3	protein_coding	859.083	795.758	1334.17	1063.17	1643.41	1043.81	894.991	835.059	953.419	617.633	1141.58	787.093	1790.61	1025.57	1290.9	787.218	1800.94	1001.97	1193.61	919.621	780.41	684.505	834.072	880.517	1170.26	799.079	1252.78	791.11
ENSG00000183347	24.8173	1.34287	6.47086e-06	1	89364058	89386461	guanylate binding protein family member 6 [Source:HGNC Symbol;Acc:HGNC:25395]	GBP6	protein_coding	13.8038	41.7683	5.95942	56.6184	5.59221	27.6929	20.6119	17.8033	6.42033	37.6259	1.82362	36.2875	2.33001	74.6912	7.40006	19.0841	4.35009	31.3115	18.9162	12.6223	4.28208	20.5866	8.21745	34.6743	30.0066	61.5752	42.6872	50.1408
ENSG00000180573	6186.97	-0.417804	6.51619e-06	6	26124145	26139116	histone cluster 1 H2A family member c [Source:HGNC Symbol;Acc:HGNC:4733]	HIST1H2AC	protein_coding	9089.39	5339.86	4409.97	4213.13	6635.15	4038.19	4250.39	3431.8	4490.22	2440	4910.09	4156.65	6478.6	5968.6	10476.8	6706.86	6143.77	4567.4	7574.04	5200.37	11347.5	8612.42	8561.22	8091.72	6047.49	5124.74	8817.68	6111.05
ENSG00000176597	1312.94	-0.689687	6.51619e-06	3	183253244	183298504	UDP-GlcNAc:betaGal beta-1,3-N-acetylglucosaminyltransferase 5 [Source:HGNC Symbol;Acc:HGNC:15684]	B3GNT5	protein_coding	967.89	638.767	2270.54	1518.81	3911.05	1490.45	514.213	629.897	801.738	659.518	2277.7	1310.67	1943.23	1191.23	2425.58	1746.19	1905.34	790.956	1012.02	733.894	1627.19	704.063	1179.2	899.43	1097.55	836.864	1316.81	361.571
ENSG00000114805	41.965	-1.0851	6.53055e-06	3	155375580	155745067	phospholipase C eta 1 [Source:HGNC Symbol;Acc:HGNC:29185]	PLCH1	protein_coding	23.5477	7.92157	10.429	9.88576	81.087	11.3612	83.5325	33.911	7.22287	9.93892	60.1793	15.5518	110.676	42.1335	92.9119	20.2768	52.2011	8.16822	102.147	48.6858	34.2567	29.8506	105.457	32.5728	47.3181	26.5893	31.5514	35.6557
ENSG00000198168	611.147	-0.85741	6.90298e-06	11	22813799	22830299	small VCP interacting protein [Source:HGNC Symbol;Acc:HGNC:25238]	SVIP	protein_coding	1094.56	367.993	568.38	328.926	933.199	307.462	402.475	503.579	276.074	144.824	684.768	269.564	1100.93	369.626	662.717	438.933	1080.27	281.804	1061.2	622.097	2118.56	570.25	721.766	738.667	291.987	286.885	475.127	409.483
ENSG00000138138	372.722	-0.375391	7.05746e-06	10	87751512	87841343	ATPase family, AAA domain containing 1 [Source:HGNC Symbol;Acc:HGNC:25903]	ATAD1	protein_coding	387.318	276.535	389.597	346.001	491.415	328.054	296.161	237.377	314.596	280.42	326.427	280.796	517.262	358.135	360.959	292.225	607.562	355.317	380.215	331.785	615.549	439.525	475.243	410.838	308.145	261.695	461.207	305.859
ENSG00000125814	221.84	-0.54681	7.15286e-06	20	23374519	23421519	NSF attachment protein beta [Source:HGNC Symbol;Acc:HGNC:15751]	NAPB	protein_coding	261.46	170.674	441.742	177.045	274.018	154.796	175.744	202.618	201.438	161.152	299.985	151.198	206.206	168.534	226.113	175.335	207.354	137.498	346.166	254.248	389.67	244.981	242.415	158.661	174.269	138.544	285.818	183.85
ENSG00000139679	285.441	0.713182	7.48679e-06	13	48389567	48444704	lysophosphatidic acid receptor 6 [Source:HGNC Symbol;Acc:HGNC:15520]	LPAR6	protein_coding	159.962	299.579	69.2783	161.767	155.883	388.411	246.258	217.031	508.008	674.427	127.653	188.349	100.19	252.801	237.624	312.502	464.009	349.872	209.97	443.582	98.4879	219.248	301.307	742.87	210.046	316.273	178.173	358.785
ENSG00000134243	5217.57	-0.709071	7.84967e-06	1	109309568	109397951	sortilin 1 [Source:HGNC Symbol;Acc:HGNC:11186]	SORT1	protein_coding	8007.83	4459.84	7012	3372.84	5609.68	3493.57	2619.88	1939.71	2795.25	1620.04	11466	6906.72	16475.5	5484.06	8636.7	9403.67	3845.48	3271.37	4235.33	4544.01	6524.82	3843.52	4078.6	1099.07	2734.06	1990	7562.12	3060.26
ENSG00000164300	299.384	0.439858	7.94015e-06	5	80111651	80256079	serine incorporator 5 [Source:HGNC Symbol;Acc:HGNC:18825]	SERINC5	protein_coding	232.229	388.877	249.551	303.762	181.048	258.467	307.009	361.152	304.163	542.381	330.075	549.496	277.271	391.65	287.78	355.441	279.856	423.386	264.827	248.839	154.155	183.221	193.11	240.619	287.371	335.865	172.605	278.56
ENSG00000154957	179.509	0.531655	7.95337e-06	17	11977439	11997510	zinc finger protein 18 [Source:HGNC Symbol;Acc:HGNC:12969]	ZNF18	protein_coding	159.15	213.162	153.455	275.004	107.65	208.052	132.35	149.209	133.222	219.366	156.831	235.005	124.656	254.716	185.824	211.117	105.852	168.81	132.413	238.02	102.77	173.957	172.567	213.299	180.04	229.508	201.372	188.864
ENSG00000133985	87.7159	1.06202	7.95873e-06	14	70641787	70675360	tetratricopeptide repeat domain 9 [Source:HGNC Symbol;Acc:HGNC:20267]	TTC9	protein_coding	34.1035	92.1783	118.443	308.256	45.4367	152.666	22.7816	52.5621	100.318	126.366	17.3244	101.951	10.4851	98.6307	97.0231	206.346	36.2507	89.8504	34.0491	122.616	6.42312	40.1439	165.719	111.378	20.7738	41.9831	106.718	95.2675
ENSG00000065613	4275.49	-0.495538	8.08243e-06	10	103967201	104029233	STE20 like kinase [Source:HGNC Symbol;Acc:HGNC:11088]	SLK	protein_coding	4223.15	2292.21	5861.84	4556.43	4143.82	4518.91	3011.51	2180.48	2930.08	2022.57	4928.32	3913.87	4961.76	3545.92	6501.37	5260.05	6061.12	2631.53	5428.95	4771.21	6259.33	3988.66	4351.14	3275.14	5308.86	3971.6	5918.67	2895.35
ENSG00000197530	112.979	0.580369	8.11722e-06	1	1615415	1630610	mindbomb E3 ubiquitin protein ligase 2 [Source:HGNC Symbol;Acc:HGNC:30577]	MIB2	protein_coding	63.3351	152.67	85.6667	107.845	83.1841	109.351	69.4296	103.429	145.26	178.191	101.211	186.621	45.4352	94.8004	78.1118	71.5652	59.4512	117.078	66.2067	81.1431	89.9237	161.605	104.088	136.596	130.413	215.513	133.629	191.649
ENSG00000170006	8133.09	0.552433	8.18979e-06	4	152618632	152680165	transmembrane protein 154 [Source:HGNC Symbol;Acc:HGNC:26489]	TMEM154	protein_coding	6594.15	8458.8	6823.54	11379.4	3826.47	8533.68	4452.17	7166.25	4597.76	8475.77	4736.84	8498.19	5742.31	12864.1	8581.61	10082.3	6084.32	10085	7678.08	8745.42	4760.61	7564.56	8043.52	11437.3	12076.5	12765.7	9496.97	8175.18
ENSG00000075151	1216.18	-0.482337	8.21919e-06	1	20806292	21176888	eukaryotic translation initiation factor 4 gamma 3 [Source:HGNC Symbol;Acc:HGNC:3298]	EIF4G3	protein_coding	1816.42	1260.25	1220.19	935.552	1429.51	1043.1	1013.24	781.649	780.07	804.343	1592.02	1558.63	2198.37	936.513	1716.81	1023.38	1800.94	1208.9	1204.96	791.596	1717.12	1304.16	1135.38	602.072	1231.42	988.003	1121	837.351
ENSG00000175746	31.181	-1.1933	8.42085e-06	15	39250684	39254845	chromosome 15 open reading frame 54 [Source:HGNC Symbol;Acc:HGNC:33797]	C15orf54	lincRNA	67.395	17.2834	8.93913	9.88576	8.38831	5.6806	23.8664	11.0211	3.21016	3.54961	21.8834	2.59196	58.2503	40.2184	54.2671	11.9275	53.6511	8.16822	77.5564	16.2286	50.3145	4.11733	184.893	50.4353	35.7771	25.1899	8.35184	10.0282
ENSG00000162517	654.471	-0.688821	8.43899e-06	1	31629862	31644896	penta-EF-hand domain containing 1 [Source:HGNC Symbol;Acc:HGNC:30009]	PEF1	protein_coding	829.04	459.451	868.586	676.725	1224.69	636.227	365.59	566.314	654.873	367.74	826.098	714.518	950.645	266.207	814.829	481.873	745.315	398.881	923.11	742.91	922.789	443.642	605.352	342.54	634.755	351.259	1017.07	494.165
ENSG00000026950	577.121	0.615531	8.47073e-06	6	26402237	26415216	butyrophilin subfamily 3 member A1 [Source:HGNC Symbol;Acc:HGNC:1138]	BTN3A1	protein_coding	357.275	618.603	174.313	422.391	248.853	524.035	532.655	447.626	638.823	1422.69	321.868	400.026	214.361	481.663	420.981	480.68	245.055	466.95	376.432	411.125	813.596	1280.49	425.938	714.5	944.054	1438.62	617.108	718.685
ENSG00000197006	10256.9	-0.60909	8.48938e-06	16	21597218	21657473	methyltransferase like 9 [Source:HGNC Symbol;Acc:HGNC:24586]	METTL9	protein_coding	9773.9	5157.66	11308.7	8131.48	20680.7	8563.5	10092.2	10599.7	7218.05	3042.02	7541.56	6610.37	13265.9	9360.34	10527	8602.14	16773.9	5783.1	20034.1	13240.7	15653.2	8998.42	10884	8596.07	7293.91	6280.67	13939.2	9240.95
ENSG00000229754	329.353	-0.955609	8.5387e-06	2	218059155	218065729	C-X-C motif chemokine receptor 2 pseudogene 1 [Source:HGNC Symbol;Acc:HGNC:6028]	CXCR2P1	transcribed_unprocessed_pseudogene	836.348	890.817	318.084	326.23	777.317	163.317	118.247	144.97	55.3753	29.8168	160.478	90.7187	495.127	95.758	379.048	159.829	939.619	491.454	327.25	52.2922	588.786	169.84	568.374	313.119	301.22	166.533	180.028	81.8966
ENSG00000254859	38.1882	-0.756378	8.70856e-06	8	143541973	143549729		RP11-661A12.5	antisense	0.811988	2.88057	49.1652	22.4676	70.6016	37.6339	16.2726	5.08665	10.433	7.80915	43.7668	19.8717	82.7154	58.4124	63.3117	33.3971	110.202	80.3208	56.7486	27.0477	85.6417	49.4079	19.1741	10.5074	1.1541	1.39944	66.8147	36.2128
ENSG00000204388	326.739	-0.914345	8.7352e-06	6	31827735	31830255	heat shock protein family A (Hsp70) member 1B [Source:HGNC Symbol;Acc:HGNC:5233]	HSPA1B	protein_coding	254.964	257.811	440.997	257.03	552.23	235.745	128.011	155.991	251.195	84.4808	265.336	270.428	408.917	121.613	376.581	140.745	1455.83	204.205	533.436	272.28	676.569	230.57	197.219	176.524	330.073	172.131	476.055	221.734
ENSG00000106701	161.307	-0.836604	8.97868e-06	9	105447796	105552433	fibronectin type III and SPRY domain containing 1 like [Source:HGNC Symbol;Acc:HGNC:13753]	FSD1L	protein_coding	268.768	77.7754	339.687	82.6809	310.367	116.452	93.296	61.8876	158.101	104.359	384.783	165.022	297.076	129.273	117.579	149.094	158.053	72.1526	155.113	149.664	366.118	133.813	141.066	113.479	88.8657	92.3629	126.206	63.5117
ENSG00000153922	2699.08	-0.424847	9.34325e-06	5	98853985	98928957	chromodomain helicase DNA binding protein 1 [Source:HGNC Symbol;Acc:HGNC:1915]	CHD1	protein_coding	2442.46	1816.2	2691.42	2181.16	3177.77	2244.55	2130.62	1487	1773.62	1755.64	3780.36	2214.4	3630.16	3161.93	5476.05	3083.27	3926.68	2227.2	3162.79	2841.81	3837.82	2298.5	1837.97	1723.21	2882.94	2314.67	3073.48	2400.63
ENSG00000114013	293.652	0.812144	9.38141e-06	3	122055366	122121139	CD86 molecule [Source:HGNC Symbol;Acc:HGNC:1705]	CD86	protein_coding	186.757	348.549	104.29	155.476	227.882	418.944	407.899	334.024	678.95	518.244	84.7982	246.237	87.3754	329.408	192.402	370.947	168.203	405.688	71.8815	239.823	72.7954	240.864	225.98	423.447	409.706	652.138	260.763	358.785
ENSG00000049245	2078.48	-0.421353	9.43019e-06	1	7771269	7781432	vesicle associated membrane protein 3 [Source:HGNC Symbol;Acc:HGNC:12644]	VAMP3	protein_coding	2448.14	1786.67	3600.98	2360	3130.24	2054.25	947.063	1196.21	1580.2	1100.38	2379.82	1774.63	2840.28	1699.7	2547.27	1921.53	2815.96	1979.43	2160.23	1990.71	2864.71	2039.11	2262.54	1678.03	2048.53	1705.91	2044.34	1240.71
ENSG00000114541	778.823	-0.952281	9.59426e-06	3	69169990	69542583	FERM domain containing 4B [Source:HGNC Symbol;Acc:HGNC:24886]	FRMD4B	protein_coding	570.016	393.918	297.971	321.736	1720.3	274.799	769.15	407.78	459.856	318.755	360.164	364.603	1069.48	605.191	3968.9	552.245	1664.63	348.511	819.071	367.849	1011.64	543.487	914.877	394.026	954.441	607.356	980.877	745.427
ENSG00000250548	29.3329	-1.10182	9.69227e-06	14	61556313	61570653		RP11-47I22.2	lincRNA	19.4877	8.64171	53.6348	12.5819	109.747	19.8821	36.8845	20.3466	7.22287	9.229	101.211	14.6878	30.2901	30.6426	46.8671	10.7348	75.4015	32.6729	9.45809	1.80318	29.9746	11.3226	21.9132	7.35515	33.4689	27.9887	22.2716	15.5994
ENSG00000121797	105.855	-0.622984	9.84453e-06	3	46407163	46412997	C-C motif chemokine receptor like 2 [Source:HGNC Symbol;Acc:HGNC:1612]	CCRL2	protein_coding	86.0707	62.6524	193.681	98.8576	122.33	76.688	150.792	139.883	101.12	61.7633	165.949	91.5827	72.2303	60.3275	83.8674	44.1319	52.2011	28.5888	98.3642	95.5685	134.886	107.05	71.2179	54.6383	177.731	97.9606	320.154	113.652
ENSG00000243943	109.788	-0.536427	9.84808e-06	2	27582969	27623215	zinc finger protein 512 [Source:HGNC Symbol;Acc:HGNC:29380]	ZNF512	protein_coding	105.558	77.0553	142.281	86.2757	142.601	95.15	90.0415	71.2132	138.84	117.847	129.477	101.951	206.206	77.564	108.534	75.1435	136.303	91.2118	115.389	115.403	152.014	91.6105	120.523	75.653	105.023	75.5696	138.269	91.3677
ENSG00000070731	304.835	0.693431	9.85536e-06	17	76565379	76586956	ST6 N-acetylgalactosaminide alpha-2,6-sialyltransferase 2 [Source:HGNC Symbol;Acc:HGNC:10867]	ST6GALNAC2	protein_coding	271.204	465.212	253.275	450.251	167.766	333.025	209.374	343.349	231.132	397.557	125.83	278.204	151.451	446.232	277.091	405.536	181.254	382.545	249.694	299.328	86.7122	297.477	416.351	403.483	376.237	362.454	325.722	347.643
ENSG00000178075	33.3582	1.28855	1.0429e-05	3	113828182	113947174	GRAM domain containing 1C [Source:HGNC Symbol;Acc:HGNC:25252]	GRAMD1C	protein_coding	6.4959	20.8841	22.3478	119.528	11.8834	34.7937	26.0361	34.7588	15.2483	190.259	13.6771	52.7033	1.16501	57.4548	60.845	50.0957	21.7504	23.1433	5.67486	9.01589	3.21156	12.352	9.58703	43.0802	18.4656	25.1899	3.71193	40.6698
ENSG00000167536	832.706	-0.709274	1.0429e-05	17	28897781	28903071	dehydrogenase/reductase 13 [Source:HGNC Symbol;Acc:HGNC:28326]	DHRS13	protein_coding	705.618	493.298	917.751	826.809	1939.8	661.079	518.552	600.225	660.491	337.213	726.711	853.62	1276.85	738.294	1449.59	454.439	1841.54	744.669	1320.35	658.16	883.18	425.114	624.526	447.614	878.27	512.194	1100.59	719.242
ENSG00000246263	103.037	0.719944	1.0445e-05	8	102239394	102253333	UBR5 antisense RNA 1 [Source:HGNC Symbol;Acc:HGNC:51661]	UBR5-AS1	antisense	135.602	164.913	60.3391	78.1873	80.388	83.7888	61.8357	61.8876	47.3499	137.015	80.2391	128.734	67.5703	222.159	116.757	149.094	142.103	242.324	64.315	97.3717	43.8913	97.7865	49.3047	100.871	66.9378	121.751	51.039	131.48
ENSG00000169860	230.893	-0.728242	1.0926e-05	3	152834693	152841439	purinergic receptor P2Y1 [Source:HGNC Symbol;Acc:HGNC:8539]	P2RY1	protein_coding	365.395	352.15	475.264	106.946	451.571	182.489	154.047	137.34	45.7448	25.5572	339.193	182.301	267.951	180.025	239.269	172.949	179.804	145.667	232.669	180.318	374.682	304.682	284.872	126.088	266.597	139.944	397.176	154.322
ENSG00000138722	1546.41	-0.901471	1.0926e-05	4	89879532	89954629	multimerin 1 [Source:HGNC Symbol;Acc:HGNC:7178]	MMRN1	protein_coding	1536.28	1330.1	961.702	689.307	1479.84	311.723	3730.76	708.74	158.101	55.374	1912.06	362.875	2606.12	1689.17	2224.13	1000.72	1673.33	1143.55	1793.25	568.001	2026.5	1793.1	2948.7	1616.03	2632.5	2276.88	2189.11	1881.39
ENSG00000103381	5250.97	0.667232	1.11567e-05	16	12659799	12804017	calcineurin like phosphoesterase domain containing 1 [Source:HGNC Symbol;Acc:HGNC:25632]	CPPED1	protein_coding	3568.69	4876.09	5227.9	10008	2361.31	7254.83	3325.03	3654.76	3559.27	5368.44	3844.18	8029.9	3340.07	8941.88	4588.04	7151.75	2382.4	3756.02	2504.5	3692.91	2083.23	5826.02	5761.8	6560.8	7546.66	9545.56	6568.26	5698.78
ENSG00000142657	18173.6	-0.733741	1.13478e-05	1	10398592	10420144	phosphogluconate dehydrogenase [Source:HGNC Symbol;Acc:HGNC:8891]	PGD	protein_coding	31160	16803.1	32981.7	16484	27240.3	20725.7	8829.49	10687.9	12106.3	4791.98	26573.7	19266.1	26802.1	7955.57	17686.2	14738.9	21241.5	15254.1	25005.3	20044.1	23281.7	16782.2	21616	6113.18	13462.6	9037.57	31398.3	10792
ENSG00000269970	39.8473	-0.792272	1.14672e-05	9	122372605	122372825		RP11-498E2.9	sense_intronic	56.8392	39.6078	54.3797	37.7456	48.9318	12.0713	43.3935	27.1288	7.22287	4.96946	28.2661	8.63988	43.1052	22.0243	35.3559	13.1203	39.1508	35.3956	43.5072	14.4254	47.1029	30.8799	124.631	81.9574	62.3214	41.9831	71.4546	40.1126
ENSG00000163739	48.8749	-0.83939	1.15115e-05	4	73869393	73871242	C-X-C motif chemokine ligand 1 [Source:HGNC Symbol;Acc:HGNC:4602]	CXCL1	protein_coding	47.0953	23.7647	81.942	50.3275	69.2035	23.4325	31.4603	25.4333	40.127	30.5267	85.71	41.4714	97.8605	44.0487	126.623	26.2406	118.902	38.1184	28.3743	25.2445	49.244	41.1733	45.196	21.0147	66.9378	37.7848	25.0555	26.1846
ENSG00000139631	121.461	0.594681	1.15434e-05	12	53157663	53180909	cysteine sulfinic acid decarboxylase [Source:HGNC Symbol;Acc:HGNC:18966]	CSAD	protein_coding	143.722	169.954	52.1449	79.9848	55.223	107.931	77.0235	103.429	83.4642	176.061	124.006	224.637	90.8704	245.14	128.268	175.335	105.852	197.399	117.28	126.223	88.8532	121.461	79.4354	90.3633	94.6362	99.36	91.8702	150.98
ENSG00000198342	20.5735	-0.947075	1.15434e-05	19	12345949	12365905	zinc finger protein 442 [Source:HGNC Symbol;Acc:HGNC:20877]	ZNF442	protein_coding	32.4795	18.0036	29.0522	11.6832	11.1844	2.8403	10.8484	5.93443	5.61779	4.96946	54.7085	16.4158	53.5903	25.8547	9.86675	7.15652	18.8504	13.6137	30.2659	16.2286	81.3596	23.6746	16.4349	12.6088	6.9246	2.79887	35.2633	17.8278
ENSG00000079277	1962.16	-0.62106	1.15873e-05	1	46557408	46616843	MAP kinase interacting serine/threonine kinase 1 [Source:HGNC Symbol;Acc:HGNC:7110]	MKNK1	protein_coding	3532.96	1622.48	2542.44	1673.39	2007.6	1895.9	906.924	1129.24	1243.94	738.32	4011.04	2568.64	3715.2	2072.2	3718.94	1666.28	2945.01	1988.96	1422.5	1590.4	1734.24	1183.73	1655.82	794.356	1831.56	1069.17	2626.19	1052.96
ENSG00000039319	2257.88	-0.38813	1.1869e-05	5	80408013	80479350	zinc finger FYVE-type containing 16 [Source:HGNC Symbol;Acc:HGNC:20756]	ZFYVE16	protein_coding	3228.46	1852.93	3013.98	2113.75	2762.55	2172.83	1175.96	1191.97	1673.3	1427.65	2720.84	1778.09	2822.81	2776.02	3592.32	2507.17	3105.96	2059.75	2489.37	2401.83	2678.44	1930	2307.73	1707.45	2226.26	1724.11	2247.57	1531.52
ENSG00000242498	47.7339	1.10158	1.21992e-05	15	89895006	89912956	actin-related protein 2/3 complex inhibitor [Source:HGNC Symbol;Acc:HGNC:28782]	ARPIN	protein_coding	25.1716	69.1337	9.68406	44.9353	13.9805	65.3269	58.5812	99.1898	114.763	157.603	3.64723	73.439	10.4851	39.2608	20.5557	34.5899	26.1005	96.6573	15.1329	61.3081	5.3526	22.6453	28.7611	25.2177	62.3214	74.1702	33.4073	45.1267
ENSG00000075234	198.651	-0.627648	1.22114e-05	22	46267961	46294008	tetratricopeptide repeat domain 38 [Source:HGNC Symbol;Acc:HGNC:26082]	TTC38	protein_coding	245.22	192.998	438.017	195.918	298.484	183.199	100.89	144.97	193.412	108.618	301.808	167.614	297.076	110.122	171.846	141.938	243.605	141.582	192.945	162.286	344.708	179.104	202.697	123.987	155.804	120.352	259.835	143.18
ENSG00000180891	51.0937	0.714977	1.23088e-05	17	57861243	57955323	CUE domain containing 1 [Source:HGNC Symbol;Acc:HGNC:31350]	CUEDC1	protein_coding	15.4278	23.7647	19.3681	36.8469	13.9805	41.1843	59.6661	69.5176	77.0439	179.61	18.2362	55.2952	61.7453	77.564	74.0006	101.384	18.8504	24.5047	18.9162	28.8509	27.8335	54.5546	39.7177	68.2978	57.705	81.1674	34.3353	51.255
ENSG00000149781	2503.79	-0.591601	1.2463e-05	11	64206678	64223886	fermitin family member 3 [Source:HGNC Symbol;Acc:HGNC:23151]	FERMT3	protein_coding	2254.89	2205.8	2394.94	1410.07	2196.34	1448.55	3210.03	1885.45	1903.63	1356.66	3816.83	3915.59	5992.79	1745.67	3402.39	1705.64	2324.4	1251.1	2593.41	1453.36	3496.32	2479.66	1970.82	1587.66	3526.93	2958.41	3279.49	2339.35
ENSG00000236304	135.794	-0.844126	1.26263e-05	11	76657056	76663866		AP001189.4	antisense	347.531	275.815	74.4928	48.5301	143.3	31.2433	61.8357	53.4099	16.0508	9.93892	56.5321	17.2798	396.102	159.916	148.824	79.9145	162.403	102.103	194.837	45.0795	247.29	71.0239	246.524	216.452	252.748	233.706	65.8867	43.4554
ENSG00000166801	550.954	0.514929	1.27335e-05	11	59142748	59155039	family with sequence similarity 111 member A [Source:HGNC Symbol;Acc:HGNC:24725]	FAM111A	protein_coding	507.492	662.531	371.719	675.826	381.668	530.426	590.152	409.476	557.766	844.808	317.309	476.057	290.086	622.427	265.58	480.68	381.358	571.775	444.53	591.443	775.057	1119.91	347.872	522.216	504.342	745.9	617.108	821.195
ENSG00000204936	19648.8	-1.28336	1.28386e-05	19	43353659	43363172	CD177 molecule [Source:HGNC Symbol;Acc:HGNC:30072]	CD177	protein_coding	22258.2	6469.04	14500	9712.31	16917.1	4741.17	6165.13	7506.21	4469.35	190.259	18967.4	32250.9	54344	6145.75	23177	8352.86	59691.9	7928.62	39960.4	12598.8	73029.8	19577.9	22667.8	3558.84	3936.64	927.827	54231.3	15890.7
ENSG00000136950	165.229	-0.747331	1.31916e-05	9	124862130	124877733	actin related protein 2/3 complex subunit 5 like [Source:HGNC Symbol;Acc:HGNC:23366]	ARPC5L	protein_coding	121.798	118.103	246.571	138.401	274.717	151.956	173.574	132.253	250.393	111.458	280.837	158.11	404.257	74.6912	197.335	97.8058	172.553	92.5731	177.812	100.978	252.643	121.461	97.2399	119.784	124.643	86.7651	207.868	139.837
ENSG00000115232	1644.43	0.572757	1.33926e-05	2	181457202	181536187	integrin subunit alpha 4 [Source:HGNC Symbol;Acc:HGNC:6140]	ITGA4	protein_coding	660.146	778.474	914.026	2190.14	690.637	1270.32	1993.93	1727.77	1603.48	3890.38	1606.61	2204.9	814.339	1639.38	995.72	1272.67	1116.52	1117.68	1134.97	1714.82	775.057	1009.77	1533.92	2684.63	2495.16	3777.08	1741.82	2689.78
ENSG00000163221	49766.2	-0.954345	1.34721e-05	1	153373706	153375649	S100 calcium binding protein A12 [Source:HGNC Symbol;Acc:HGNC:10489]	S100A12	protein_coding	69605.2	16704.4	43879.2	36565.6	77861	54065.8	26188	18267	35151.3	5906.56	33390.4	33953	93933.2	22492.6	63265.6	39622.1	108749	14749.1	73220.8	68502.8	125769	98655.3	49500.6	17999.1	33593.6	16733.1	81245.7	33883.5
ENSG00000160179	231.433	1.03634	1.35094e-05	21	42199689	42297244	ATP binding cassette subfamily G member 1 [Source:HGNC Symbol;Acc:HGNC:73]	ABCG1	protein_coding	80.3868	494.018	212.304	475.415	74.0967	138.465	96.5506	209.401	183.782	534.572	61.0911	47.5193	24.4651	270.038	330.536	428.199	101.502	535.018	47.2905	218.185	73.8659	170.869	217.763	309.967	139.646	177.729	412.952	414.497
ENSG00000136490	2019.75	0.552495	1.38264e-05	17	63695902	63701172	LIM domain containing 2 [Source:HGNC Symbol;Acc:HGNC:28142]	LIMD2	protein_coding	1789.62	2114.34	1279.04	1899.86	1161.78	2107.5	1839.88	3240.2	1464.64	2037.48	1242.79	2682.68	1577.42	3860	2044.06	2191.09	1181.77	2013.47	1694.89	1978.09	1006.29	2135.86	2059.84	2403.03	2090.08	2180.32	2448.02	2829.06
ENSG00000203879	603.549	-0.577923	1.40737e-05	X	154436913	154443467	GDP dissociation inhibitor 1 [Source:HGNC Symbol;Acc:HGNC:4226]	GDI1	protein_coding	554.588	501.219	600.412	400.822	650.793	460.838	402.475	357.761	455.041	445.832	1058.61	782.773	1296.65	389.735	855.119	620.232	871.468	560.884	610.993	483.252	856.417	430.261	569.743	320.474	691.306	460.415	801.776	409.483
ENSG00000076356	59.6996	0.925329	1.43105e-05	1	208022242	208244320	plexin A2 [Source:HGNC Symbol;Acc:HGNC:9100]	PLXNA2	protein_coding	34.9155	117.383	32.7768	62.0107	41.9415	65.3269	26.0361	113.602	65.0058	129.916	38.2959	161.566	24.4651	69.9033	30.4225	60.8305	31.9006	100.741	51.0737	109.994	10.7052	19.5573	52.0439	36.7758	54.2427	39.1842	38.0473	52.9264
ENSG00000114446	210.749	-0.565562	1.44293e-05	3	108160812	108222570	intraflagellar transport 57 [Source:HGNC Symbol;Acc:HGNC:17367]	IFT57	protein_coding	278.512	143.308	181.762	141.995	283.804	168.998	219.137	144.122	297.743	128.496	315.486	172.798	305.231	135.019	271.336	256.442	181.254	151.112	196.728	169.499	343.637	185.28	165.719	132.393	159.266	163.734	347.993	260.175
ENSG00000165071	3332.32	-0.502756	1.44464e-05	8	132685007	132760712	transmembrane protein 71 [Source:HGNC Symbol;Acc:HGNC:26572]	TMEM71	protein_coding	3639.33	2086.25	2928.31	2466.95	4765.26	2804.79	1528.54	1687.07	3005.52	1825.21	2627.83	2701.69	4790.5	3541.13	5874.83	3431.55	6722.34	2876.57	5012.79	3499.97	3099.16	2254.24	4089.55	3172.17	3477.3	2849.25	4137.87	2408.99
ENSG00000196843	583.746	-0.439731	1.44687e-05	2	96536743	96552638	AT-rich interaction domain 5A [Source:HGNC Symbol;Acc:HGNC:17361]	ARID5A	protein_coding	397.874	370.874	724.815	373.861	904.539	476.46	407.899	343.349	245.578	213.687	1104.2	759.445	1213.94	783.3	896.23	617.847	752.565	548.632	546.678	450.795	611.267	383.941	414.981	367.758	582.821	558.375	740.529	552.663
ENSG00000083168	3351.08	-0.481635	1.51885e-05	8	41929479	42051990	lysine acetyltransferase 6A [Source:HGNC Symbol;Acc:HGNC:13013]	KAT6A	protein_coding	3758.69	3126.14	3529.47	3057.39	4784.13	2583.96	1984.17	1840.52	2198.96	2325	4436.86	3778.22	6231.62	3174.38	5777.81	3289.62	6932.59	4048.71	4223.98	2497.4	2850.8	1717.95	2872	1788.35	3209.55	2539.98	2820.14	2451.89
ENSG00000229474	64.4861	0.81296	1.55594e-05	15	44665732	44711316	PAT1 homolog 2 [Source:HGNC Symbol;Acc:HGNC:33630]	PATL2	protein_coding	71.4549	107.301	32.0319	71.8964	39.1454	66.747	45.5632	68.6698	27.2864	113.588	73.8565	54.4312	23.3001	95.758	60.845	67.987	53.6511	115.716	20.8078	45.0795	51.385	77.1999	47.9351	88.2618	49.6263	95.1617	44.5431	96.3818
ENSG00000063601	730.114	-0.850048	1.5602e-05	X	150692971	150765103	myotubularin related protein 1 [Source:HGNC Symbol;Acc:HGNC:7449]	MTMR1	protein_coding	943.53	342.788	534.113	544.615	934.597	752.679	279.888	465.429	735.93	465.709	863.482	945.203	1195.3	470.172	1571.28	708.496	1828.49	456.059	1227.66	432.763	831.795	251.157	756.006	325.728	939.438	459.015	848.175	333.715
ENSG00000129559	735.865	-0.395419	1.58334e-05	14	24216852	24232454	neural precursor cell expressed, developmentally down-regulated 8 [Source:HGNC Symbol;Acc:HGNC:7732]	NEDD8	protein_coding	798.184	503.38	797.073	671.333	947.18	825.107	591.237	591.747	815.382	487.007	684.768	500.249	789.874	694.245	798.385	601.148	813.466	481.925	820.963	623.9	955.975	695.828	749.158	709.247	959.057	758.495	1201.74	738.184
ENSG00000061676	318.27	-0.691976	1.62205e-05	2	182909115	183038858	NCK associated protein 1 [Source:HGNC Symbol;Acc:HGNC:7666]	NCKAP1	protein_coding	461.209	261.412	229.438	205.803	325.746	100.831	404.644	144.97	61.7956	54.6641	233.423	95.0387	319.212	320.789	492.515	230.202	408.908	255.938	346.166	126.223	649.806	497.167	594.396	376.163	580.512	456.217	359.129	319.23
ENSG00000163904	565.692	-0.341812	1.63907e-05	3	185582496	185633551	SUMO1/sentrin/SMT3 specific peptidase 2 [Source:HGNC Symbol;Acc:HGNC:23116]	SENP2	protein_coding	637.411	514.902	675.649	507.768	793.394	534.686	425.256	429.822	464.671	349.282	521.554	452.73	689.683	475.917	765.496	545.089	677.164	441.084	673.416	548.166	705.473	625.834	606.722	562.144	593.208	506.596	650.515	465.752
ENSG00000111328	205.724	-0.551053	1.68016e-05	12	123260971	123272334	cyclin dependent kinase 2 associated protein 1 [Source:HGNC Symbol;Acc:HGNC:14002]	CDK2AP1	protein_coding	221.673	230.446	158.67	111.439	245.358	127.103	284.227	160.23	154.89	68.8625	202.421	95.0387	219.021	140.764	231.046	141.938	168.203	126.607	255.369	167.696	305.098	179.104	458.808	426.599	243.515	246.301	222.716	167.136
ENSG00000135519	59.0627	1.27257	1.78212e-05	12	49539157	49558308	potassium voltage-gated channel subfamily H member 3 [Source:HGNC Symbol;Acc:HGNC:6252]	KCNH3	protein_coding	19.4877	133.947	43.9507	44.0366	4.89318	74.5578	37.9693	34.7588	132.419	271.9	17.3244	127.87	3.49502	99.5883	4.93338	39.3609	10.1502	47.6479	15.1329	36.0636	3.21156	42.2026	49.3047	150.255	54.2427	41.9831	44.5431	68.5258
ENSG00000107864	121.565	0.614327	1.79315e-05	10	92046692	92291087	cytoplasmic polyadenylation element binding protein 3 [Source:HGNC Symbol;Acc:HGNC:21746]	CPEB3	protein_coding	183.509	249.169	110.994	152.78	58.0191	105.091	48.8177	110.211	85.0693	94.4197	82.0627	217.725	104.851	202.049	116.757	157.444	91.3518	191.953	96.4726	133.435	66.3723	121.461	136.958	112.429	79.6329	118.952	73.3106	102.51
ENSG00000147684	506.99	-0.637218	1.8376e-05	8	124539103	124568510	NADH:ubiquinone oxidoreductase subunit B9 [Source:HGNC Symbol;Acc:HGNC:7704]	NDUFB9	protein_coding	730.789	513.462	896.893	354.989	702.521	428.885	597.746	478.145	642.033	292.488	464.11	274.748	919.189	274.825	362.603	366.175	613.362	329.451	563.702	476.039	826.442	425.114	376.633	389.823	538.965	401.639	538.229	416.726
ENSG00000186432	2597.54	-0.685588	1.8376e-05	3	160494995	160565588	karyopherin subunit alpha 4 [Source:HGNC Symbol;Acc:HGNC:6397]	KPNA4	protein_coding	3718.09	1929.26	4113.49	2778.8	5130.85	1969.75	1276.85	2460.24	1333.82	1037.91	3727.47	2573.82	4894.19	2119.12	3322.63	2211.37	4377.64	1959.01	4027.26	2326.1	3543.42	1426.65	1974.93	1399.58	1785.39	1260.89	2731.05	1321.49
ENSG00000100519	903.565	-0.398828	1.83863e-05	14	52707172	52728587	proteasome 26S subunit, ATPase 6 [Source:HGNC Symbol;Acc:HGNC:9553]	PSMC6	protein_coding	1248.03	828.884	1282.77	838.492	1154.79	836.468	625.951	451.864	771.242	478.488	873.512	547.768	1211.61	990.138	994.898	706.11	1348.53	894.42	864.47	892.574	1286.77	984.041	823.115	882.618	900.198	855.056	999.436	727.599
ENSG00000179583	78.3402	0.810373	1.88553e-05	16	10866222	10932281	class II major histocompatibility complex transactivator [Source:HGNC Symbol;Acc:HGNC:7067]	CIITA	protein_coding	29.2316	70.574	35.7565	54.821	27.262	57.516	69.4296	79.6909	153.285	467.129	70.2092	152.926	26.7951	62.2427	49.3338	88.2638	120.352	110.271	11.3497	21.6381	25.6925	56.6132	45.196	50.4353	75.0165	88.1646	15.7757	78.5539
ENSG00000093167	1482.64	-0.42087	1.91911e-05	3	37052656	37183689	LRR binding FLII interacting protein 2 [Source:HGNC Symbol;Acc:HGNC:6703]	LRRFIP2	protein_coding	1802.61	854.809	1919.68	1518.81	1581.9	1250.44	940.554	818.104	1174.12	862.556	1684.11	1362.51	2135.46	1459.35	1688.04	1685.36	1856.04	1052.34	1755.42	1491.23	2010.44	1505.91	1742.1	1239.87	1626.13	1480.6	1849.47	1166.05
ENSG00000060558	395.96	-0.484574	1.95428e-05	19	3136193	3163769	G protein subunit alpha 15 [Source:HGNC Symbol;Acc:HGNC:4383]	GNA15	protein_coding	264.708	244.128	839.533	551.805	516.58	462.259	410.069	218.726	425.347	266.931	628.236	457.05	438.042	270.995	216.246	152.673	332.057	182.424	427.506	319.163	476.382	401.439	228.719	256.38	580.512	438.024	729.394	351.543
ENSG00000109083	283.119	-0.490342	1.9619e-05	17	28328325	28335489	intraflagellar transport 20 [Source:HGNC Symbol;Acc:HGNC:30989]	IFT20	protein_coding	315.051	180.036	303.186	253.435	381.668	241.425	262.531	276.375	284.902	178.191	342.84	229.821	342.512	227.904	376.581	264.791	247.955	140.221	508.845	367.849	400.375	197.632	250.632	211.198	238.899	271.491	386.968	244.019
ENSG00000092330	1468.26	-0.507692	1.97637e-05	14	24239643	24242674	TERF1 interacting nuclear factor 2 [Source:HGNC Symbol;Acc:HGNC:11824]	TINF2	protein_coding	1738.47	1149.35	2067.17	1656.31	2501.81	1600.51	816.883	1002.07	1362.71	937.098	1633.05	1232.05	2000.31	913.531	1775.19	1215.42	1835.74	1116.32	1526.54	1428.12	1574.74	1126.09	1350.4	1087.51	1822.32	1203.52	2389.55	1048.5
ENSG00000100014	184.797	-0.768632	1.97637e-05	22	24270817	24417740	sperm antigen with calponin homology and coiled-coil domains 1 like [Source:HGNC Symbol;Acc:HGNC:29022]	SPECC1L	protein_coding	154.278	108.742	151.22	141.995	551.531	156.216	112.823	85.6253	169.336	96.5495	210.628	205.629	622.113	137.892	194.046	125.239	285.656	98.0186	221.319	128.026	268.701	122.49	102.718	96.6677	180.04	127.349	206.94	112.538
ENSG00000113615	574.349	-0.553704	1.97747e-05	5	134648789	134727823	SEC24 homolog A, COPII coat complex component [Source:HGNC Symbol;Acc:HGNC:10703]	SEC24A	protein_coding	1147.34	545.868	776.215	463.732	509.59	382.73	382.948	498.492	350.71	241.374	670.179	769.813	886.569	486.451	1036.01	566.558	690.214	405.688	785.022	439.976	798.608	568.191	645.07	349.895	472.027	286.885	523.382	402.241
ENSG00000049618	424.02	0.42553	2.06114e-05	6	156777374	157210779	AT-rich interaction domain 1B [Source:HGNC Symbol;Acc:HGNC:18040]	ARID1B	protein_coding	475.825	546.588	252.53	408.012	263.533	376.339	379.693	401.846	426.149	832.03	572.615	873.492	322.707	549.651	406.181	505.728	369.757	540.464	365.082	366.045	280.476	339.679	287.611	339.388	290.833	368.052	309.946	422.297
ENSG00000144224	2135.21	-0.288554	2.06114e-05	2	135741619	135785055	UBX domain protein 4 [Source:HGNC Symbol;Acc:HGNC:14860]	UBXN4	protein_coding	2179.38	1881.01	2275.01	2072.41	2402.55	1922.88	1799.75	1639.6	1703.79	1357.37	2342.43	1799.69	3192.12	2321.17	3393.34	2853.07	2262.05	1682.65	2133.75	1983.5	2611	2002.05	2072.17	1811.47	2123.54	1971.81	2427.6	1568.85
ENSG00000106066	992.569	0.825236	2.06998e-05	7	28995231	29195451	carboxypeptidase, vitellogenic like [Source:HGNC Symbol;Acc:HGNC:14399]	CPVL	protein_coding	821.732	1512.3	569.87	657.852	1072.31	2515.79	881.973	822.342	1748.74	1169.24	280.837	469.145	648.908	2045.39	462.093	1019.8	639.463	1281.05	198.62	901.589	363.977	1595.46	710.81	1358.6	1132.17	1563.17	466.775	881.921
ENSG00000103489	190.785	0.699102	2.09552e-05	16	17101769	17470881	xylosyltransferase 1 [Source:HGNC Symbol;Acc:HGNC:15516]	XYLT1	protein_coding	164.834	280.856	109.504	307.357	132.815	166.157	135.605	295.874	182.979	389.748	155.919	444.09	109.511	253.759	208.024	243.322	155.153	358.04	88.9061	95.5685	64.2312	73.0825	169.827	146.052	177.731	198.72	81.6624	152.651
ENSG00000144655	671.97	-0.701823	2.12939e-05	3	39141855	39154562	cysteine and serine rich nuclear protein 1 [Source:HGNC Symbol;Acc:HGNC:14300]	CSRNP1	protein_coding	367.831	458.011	1219.45	679.421	1614.75	600.013	528.316	378.956	367.564	313.076	1077.76	796.597	742.109	489.323	1572.1	375.718	1547.18	581.305	699.899	351.62	448.548	307.77	290.35	259.532	799.791	507.996	904.782	535.392
ENSG00000138613	762.295	-0.566559	2.14103e-05	15	63276018	63309126	aph-1 homolog B, gamma-secretase subunit [Source:HGNC Symbol;Acc:HGNC:24080]	APH1B	protein_coding	941.906	733.105	1594.89	585.057	808.074	514.804	418.747	501.883	731.115	367.03	1168.94	502.841	1217.43	763.191	938.164	734.736	959.919	702.467	741.515	699.633	832.865	635.098	803.941	477.034	759.398	559.775	1005	645.702
ENSG00000169908	6.18741	-1.441	2.1462e-05	3	149369022	149377865	transmembrane 4 L six family member 1 [Source:HGNC Symbol;Acc:HGNC:11853]	TM4SF1	protein_coding	8.93187	1.44029	35.7565	1.79741	11.8834	1.42015	4.33935	0	2.40762	0.709923	5.47085	0.863988	3.49502	0	32.8892	1.19275	13.0503	2.72274	1.89162	3.60636	3.21156	4.11733	5.4783	3.15221	5.7705	2.79887	12.0638	2.7856
ENSG00000137767	1873.96	-0.467276	2.15618e-05	15	45631148	45691294	sulfide quinone reductase-like (yeast) [Source:HGNC Symbol;Acc:HGNC:20390]	SQRDL	protein_coding	2359.64	1232.16	2158.8	1873.8	2491.33	1758.85	1409.2	1208.93	1441.36	770.976	1468.01	1226	3121.05	1644.16	1665.84	1214.22	1866.19	1068.68	2199.95	2127.75	3080.96	2838.9	1928.36	1501.5	1905.42	1714.31	3322.17	1872.48
ENSG00000072310	66.0738	0.738712	2.16296e-05	17	17810399	17837002	sterol regulatory element binding transcription factor 1 [Source:HGNC Symbol;Acc:HGNC:11289]	SREBF1	protein_coding	25.9836	61.2121	26.8174	81.7822	25.1649	41.1843	82.4477	76.2998	55.3753	162.572	120.359	136.51	51.2602	89.0549	50.156	58.4449	34.8007	91.2118	24.591	50.489	34.2567	47.3493	38.3481	72.5008	83.0952	104.958	40.8312	83.0109
ENSG00000189319	404.15	0.545299	2.18373e-05	10	124619292	124744269	family with sequence similarity 53 member B [Source:HGNC Symbol;Acc:HGNC:28968]	FAM53B	protein_coding	240.348	403.28	417.159	711.774	165.669	411.133	364.505	360.305	432.57	575.038	351.046	791.413	297.076	530.499	366.714	462.789	191.404	253.215	270.501	254.248	199.117	367.471	305.415	375.113	596.67	780.886	362.841	478.009
ENSG00000105401	1280.62	-0.442279	2.18696e-05	19	10391134	10420121	cell division cycle 37 [Source:HGNC Symbol;Acc:HGNC:1735]	CDC37	protein_coding	1549.27	980.834	1899.57	1177.3	1083.49	1180.14	1005.64	1043.61	1292.09	783.045	1518.16	1365.1	1420.14	939.386	1227.59	1053.2	961.369	796.401	1751.64	1161.25	1954.77	1230.05	1412.03	1013.96	1712.68	1157.33	2057.34	1129.84
ENSG00000169660	62.413	0.619586	2.20167e-05	17	82418318	82442645	hexosaminidase D [Source:HGNC Symbol;Acc:HGNC:26307]	HEXDC	protein_coding	30.0436	59.7718	36.5015	56.6184	30.7571	40.4742	62.9206	56.801	51.3626	132.756	53.7967	71.711	65.2403	108.207	49.3338	77.529	39.1508	58.5389	32.1575	46.8827	34.2567	67.9359	41.0873	54.6383	70.4001	131.547	77.9505	109.196
ENSG00000165169	248.407	-0.590604	2.20456e-05	X	37836757	37847637	dynein light chain Tctex-type 3 [Source:HGNC Symbol;Acc:HGNC:11694]	DYNLT3	protein_coding	248.468	167.793	546.777	253.435	450.173	188.88	159.471	133.101	235.144	144.824	206.069	132.19	223.681	210.668	297.647	158.636	442.259	193.315	230.777	209.169	403.586	269.685	265.698	298.409	271.214	229.508	256.123	128.695
ENSG00000061918	409.861	-0.804923	2.20456e-05	4	155758992	155807591	guanylate cyclase 1 soluble subunit beta [Source:HGNC Symbol;Acc:HGNC:4687]	GUCY1B3	protein_coding	437.662	442.168	382.148	248.043	539.648	110.772	663.921	275.527	58.5855	34.7862	303.632	95.9027	379.792	289.189	706.295	306.538	482.86	378.461	567.486	115.403	776.127	495.108	817.637	479.136	680.919	617.152	440.791	350.428
ENSG00000116717	1247.58	-0.960931	2.20456e-05	1	67685061	67688338	growth arrest and DNA damage inducible alpha [Source:HGNC Symbol;Acc:HGNC:4095]	GADD45A	protein_coding	2108.73	1244.41	2114.1	848.378	1999.91	1000.49	451.292	1038.53	918.909	99.3892	1945.8	889.044	2237.98	637.748	1989.8	1578.01	1738.59	1068.68	1899.19	1406.48	1666.8	740.089	1564.06	308.916	777.864	278.488	1710.27	670.215
ENSG00000164463	3458.48	0.59836	2.237e-05	5	173056352	173139284	CREB3 regulatory factor [Source:HGNC Symbol;Acc:HGNC:24050]	CREBRF	protein_coding	3778.18	5720.81	2278.73	4953.66	2686.36	2846.69	1709.7	2401.75	1251.16	2136.87	2246.7	2892.63	1917.6	7665.43	3762.52	5700.17	3400.32	5434.59	3026.59	4152.72	2493.24	4619.64	3132.22	3888.77	2691.36	3193.52	3194.11	3661.39
ENSG00000129355	2727	-0.605449	2.24172e-05	19	10566462	10569059	cyclin dependent kinase inhibitor 2D [Source:HGNC Symbol;Acc:HGNC:1790]	CDKN2D	protein_coding	2345.83	1667.85	3407.3	2129.03	4240.99	2273.66	2869.4	4616.99	1920.48	805.762	3203.18	2185.89	4220.82	1874.94	3884.21	2825.63	3513.42	1658.15	3631.91	2710.18	3542.35	2117.33	2782.98	1856.65	2544.79	2232.1	3543.03	1751.03
ENSG00000112561	329.387	0.466543	2.35021e-05	6	41683978	41736259	transcription factor EB [Source:HGNC Symbol;Acc:HGNC:11753]	TFEB	protein_coding	184.321	355.03	234.652	283.092	169.863	270.538	274.464	308.59	213.476	406.076	352.87	681.686	519.593	669.348	333.825	447.283	237.805	310.392	225.103	234.413	145.591	241.893	272.546	285.8	392.394	509.395	297.882	364.914
ENSG00000143452	49.1043	1.1401	2.35057e-05	1	150698060	150720888	HORMA domain containing 1 [Source:HGNC Symbol;Acc:HGNC:25245]	HORMAD1	protein_coding	66.583	40.328	36.5015	90.7692	32.8542	65.3269	22.7816	56.801	27.2864	114.298	4.55904	90.7187	6.99003	90.0125	18.9113	89.4566	20.3004	83.0436	56.7486	63.1113	19.2694	48.3786	10.9566	12.6088	41.5476	74.1702	28.7674	61.8403
ENSG00000160310	1356.42	-0.322983	2.37895e-05	21	46635167	46665124	protein arginine methyltransferase 2 [Source:HGNC Symbol;Acc:HGNC:5186]	PRMT2	protein_coding	1320.29	995.957	1559.88	1298.63	1621.04	1342.75	1066.4	922.38	1150.84	1068.43	1545.51	1273.52	1926.92	1141.44	1360.79	1325.15	1683.48	1138.11	1433.85	1105.35	1449.48	1177.56	1673.62	1196.79	1493.41	1333.66	1897.72	1476.93
ENSG00000117475	486.957	-0.49606	2.37895e-05	1	169367970	169396540	basic leucine zipper nuclear factor 1 [Source:HGNC Symbol;Acc:HGNC:1065]	BLZF1	protein_coding	606.555	394.638	804.522	408.012	717.2	426.045	295.076	239.921	341.08	252.023	550.732	263.516	602.308	548.693	546.783	429.391	584.362	453.336	486.146	521.119	1026.63	505.402	505.373	381.417	428.171	397.44	559.573	359.342
ENSG00000169599	137.406	-0.509733	2.39923e-05	2	69395750	69437628	NFU1 iron-sulfur cluster scaffold [Source:HGNC Symbol;Acc:HGNC:16287]	NFU1	protein_coding	189.193	112.342	228.693	161.767	165.669	106.511	122.587	111.059	158.903	78.0915	117.623	84.6708	220.186	104.376	98.6675	114.504	166.753	122.523	153.221	108.191	221.598	150.282	167.088	105.074	123.489	92.3629	143.837	118.109
ENSG00000137942	213.969	-0.636717	2.42434e-05	1	93448131	93554661	formin binding protein 1 like [Source:HGNC Symbol;Acc:HGNC:20851]	FNBP1L	protein_coding	233.041	139.708	155.69	100.655	353.707	112.902	250.597	241.616	59.388	43.3053	147.713	57.0232	205.041	194.389	333.825	171.757	317.556	149.751	459.663	284.902	459.253	236.746	239.676	164.966	253.902	260.295	198.588	165.465
ENSG00000135114	276.868	1.00007	2.46037e-05	12	121019111	121039242	2'-5'-oligoadenylate synthetase like [Source:HGNC Symbol;Acc:HGNC:8090]	OASL	protein_coding	81.1988	427.765	67.0435	184.235	301.28	227.934	450.208	313.677	92.2922	218.656	75.6801	420.762	64.0753	496.984	257.358	279.104	36.2507	92.5731	66.2067	97.3717	335.073	1104.47	105.457	349.895	246.977	460.415	340.569	558.791
ENSG00000172426	26.3716	-0.811179	2.46037e-05	6	43645046	43672599	radial spoke head 9 homolog [Source:HGNC Symbol;Acc:HGNC:21057]	RSPH9	protein_coding	17.0517	14.4029	75.2377	36.8469	41.2425	28.403	24.9513	16.1077	18.4584	7.80915	39.2077	26.7836	17.4751	19.1516	20.5557	7.15652	31.9006	12.2523	28.3743	10.8191	53.526	25.7333	35.609	22.0655	38.0853	9.79606	39.9032	19.4992
ENSG00000232119	227.26	-0.366145	2.49677e-05	X	120594010	120621074	MCTS1, re-initiation and release factor [Source:HGNC Symbol;Acc:HGNC:23357]	MCTS1	protein_coding	265.52	192.278	273.388	168.957	284.503	232.904	219.137	180.576	240.762	148.374	212.451	158.974	322.707	229.819	222.824	202.768	261.005	198.76	225.103	196.547	315.804	233.658	238.306	202.792	208.892	187.525	293.242	245.69
ENSG00000165115	196.065	0.92863	2.49948e-05	9	83836698	83921465	kinesin family member 27 [Source:HGNC Symbol;Acc:HGNC:18632]	KIF27	protein_coding	202.997	465.932	209.325	241.752	55.9221	129.944	79.1931	111.059	89.082	100.099	106.682	106.271	72.2303	511.348	265.58	614.268	105.852	522.766	90.7977	265.067	54.5966	227.482	208.175	160.763	76.1706	151.139	96.5101	168.807
ENSG00000081189	464.128	0.691187	2.51175e-05	5	88717117	88904257	myocyte enhancer factor 2C [Source:HGNC Symbol;Acc:HGNC:6996]	MEF2C	protein_coding	237.912	479.615	193.681	435.872	250.251	676.701	496.856	577.335	835.445	932.129	156.831	499.385	189.896	553.481	447.293	541.51	527.811	477.841	234.561	376.864	195.905	363.354	362.938	635.695	730.545	715.112	316.442	554.334
ENSG00000169490	173.887	-0.581723	2.51175e-05	8	38988808	38996824	TM2 domain containing 2 [Source:HGNC Symbol;Acc:HGNC:24127]	TM2D2	protein_coding	152.654	150.51	305.42	170.754	260.737	165.447	164.895	103.429	170.941	97.9694	237.982	118.366	320.377	116.825	191.579	181.299	178.354	183.785	174.029	138.845	253.713	135.872	131.479	113.479	189.272	125.949	216.22	118.667
ENSG00000151116	428.105	-0.501632	2.55297e-05	11	18529609	18588747	UEV and lactate/malate dehyrogenase domains [Source:HGNC Symbol;Acc:HGNC:30866]	UEVLD	protein_coding	519.672	301.02	578.809	521.249	534.755	492.792	277.718	259.419	413.309	211.557	270.807	275.612	641.918	405.056	750.695	401.958	543.761	269.551	493.712	348.014	580.222	434.378	465.656	318.373	400.473	351.259	600.404	324.801
ENSG00000182871	612.257	0.56123	2.567e-05	21	45405137	45513720	collagen type XVIII alpha 1 chain [Source:HGNC Symbol;Acc:HGNC:2195]	COL18A1	protein_coding	484.757	691.337	254.02	341.508	332.736	651.848	561.946	662.113	369.971	1019.45	361.988	667.863	604.638	1467.01	490.049	523.619	201.554	206.928	429.397	573.411	368.259	633.039	706.701	851.096	1097.55	1433.02	512.246	645.145
ENSG00000233429	74.2364	0.854856	2.57501e-05	7	27095647	27100265	HOXA transcript antisense RNA, myeloid-specific 1 [Source:HGNC Symbol;Acc:HGNC:37117]	HOTAIRM1	antisense	54.4032	108.742	38.7362	111.439	27.961	66.0369	41.2238	75.452	18.4584	21.2977	82.0627	160.702	27.9601	131.188	145.535	149.094	43.5009	38.1184	3.78324	19.835	43.8913	147.194	83.5441	115.581	56.5509	167.932	48.2551	50.1408
ENSG00000179152	279.993	-0.501158	2.60467e-05	3	44338119	44409451	T-cell activation inhibitor, mitochondrial [Source:HGNC Symbol;Acc:HGNC:25241]	TCAIM	protein_coding	418.986	209.562	340.432	239.056	305.474	267.698	202.865	150.904	295.335	152.633	292.69	255.74	320.377	211.625	377.403	348.284	345.107	197.399	319.684	279.493	410.009	411.733	275.285	168.118	231.974	158.136	437.079	216.72
ENSG00000132825	1310.21	-0.622365	2.60557e-05	20	59936668	59940297	protein phosphatase 1 regulatory subunit 3D [Source:HGNC Symbol;Acc:HGNC:9294]	PPP1R3D	protein_coding	1493.25	1149.35	1489.86	1325.59	2507.41	968.542	565.2	807.082	1161.28	426.664	1288.38	1233.77	2217.01	1188.36	2292.38	1276.25	2215.64	1172.14	1776.23	1222.56	1657.17	957.278	1255.9	738.667	1077.93	757.096	1599.84	865.207
ENSG00000143546	285276	-0.691197	2.60571e-05	1	153390032	153391188	S100 calcium binding protein A8 [Source:HGNC Symbol;Acc:HGNC:10498]	S100A8	protein_coding	345604	152020	326203	215701	400410	292011	247562	177695	287424	82578.2	243561	236035	450382	166769	247921	241936	456775	131557	391529	405329	588431	391735	266529	174713	236518	151549	431311	247941
ENSG00000139890	18.8743	1.10846	2.60686e-05	14	22883165	22887686	RRAD and GEM like GTPase 2 [Source:HGNC Symbol;Acc:HGNC:20248]	REM2	protein_coding	10.5558	35.287	1.48986	8.08835	21.6698	14.2015	20.6119	27.9766	8.02541	39.0458	4.55904	11.2318	5.82503	32.5577	20.5557	23.8551	18.8504	59.9003	11.3497	25.2445	3.21156	15.44	5.4783	25.2177	12.6951	20.9916	8.35184	36.2128
ENSG00000196549	3494.39	1.34153	2.62748e-05	3	155024124	155183729	membrane metalloendopeptidase [Source:HGNC Symbol;Acc:HGNC:7154]	MME	protein_coding	495.313	6952.26	335.217	2557.71	2385.08	2112.47	4653.95	9681.6	2979.83	9686.9	109.417	1769.45	431.052	4574.36	4699.04	2694.43	2394	4708.98	679.091	3188.02	24.622	739.06	2833.65	10324.5	1049.08	8596.74	729.394	6457.58
ENSG00000139278	2954.32	0.903253	2.65696e-05	12	75480680	75503853	GLI pathogenesis related 1 [Source:HGNC Symbol;Acc:HGNC:17001]	GLIPR1	protein_coding	3662.07	3766.35	1129.31	2963.93	877.976	3757.71	1356.05	2124.53	2556.9	3046.28	1772.55	2797.59	895.889	6991.29	2524.24	5392.44	1513.83	3894.88	1314.67	4039.12	705.473	3094.17	4167.62	4807.12	3607.72	3866.65	2876.74	3217.93
ENSG00000184500	541.283	-0.813225	2.67321e-05	3	93873033	93974066	protein S (alpha) [Source:HGNC Symbol;Acc:HGNC:9456]	PROS1	protein_coding	401.934	501.939	457.386	369.368	694.133	239.295	1230.21	340.806	212.673	86.6106	660.149	151.198	680.363	337.068	1125.63	416.271	497.36	274.997	682.874	238.02	491.369	398.351	924.464	591.564	843.647	976.807	735.89	595.561
ENSG00000185825	1125.52	-0.502461	2.74801e-05	X	153700497	153724697	B-cell receptor-associated protein 31 [Source:HGNC Symbol;Acc:HGNC:16695]	BCAP31	protein_coding	1371.45	1078.77	1728.23	885.225	947.18	796.704	919.942	845.232	1204.61	565.809	1654.02	1054.93	2481.46	996.841	1471.79	1066.32	1010.67	902.588	1360.07	1126.99	1254.65	1138.44	1128.53	830.081	882.887	691.322	1299.17	820.638
ENSG00000177324	243.931	-0.698677	2.74801e-05	X	18162931	18220883	BEN domain containing 2 [Source:HGNC Symbol;Acc:HGNC:28509]	BEND2	protein_coding	301.248	151.23	127.383	96.1614	232.776	77.3981	165.98	100.038	36.1143	18.458	92.0926	38.8795	378.627	425.166	374.114	273.141	510.41	257.299	225.103	75.7335	459.253	158.517	717.658	654.609	308.145	246.301	171.677	156.551
ENSG00000228232	33.858	-0.790814	2.75498e-05	X	39787132	39788136	glyceraldehyde-3-phosphate dehydrogenase pseudogene 1 [Source:HGNC Symbol;Acc:HGNC:4159]	GAPDHP1	processed_pseudogene	104.746	54.0107	154.2	80.8835	25.864	25.5627	16.2726	16.1077	24.8788	16.3282	32.8251	7.77589	22.1351	10.5334	28.778	11.9275	26.1005	10.891	17.0246	16.2286	25.6925	15.44	76.6962	35.725	28.8525	15.3938	31.5514	15.5994
ENSG00000120137	1710	-0.503273	2.76222e-05	5	168548495	168579600	pantothenate kinase 3 [Source:HGNC Symbol;Acc:HGNC:19365]	PANK3	protein_coding	2452.2	1363.23	3112.31	1582.62	2324.96	1622.52	1549.15	1819.33	1682.13	1033.65	1843.68	1212.18	1895.46	1338.7	1686.39	1325.15	2566.55	1119.05	1967.28	1512.87	2769.44	1586.2	1718.82	1563.5	1312.21	1235.7	1512.61	1172.18
ENSG00000092529	32.9992	-0.996445	2.76222e-05	15	42359500	42412318	calpain 3 [Source:HGNC Symbol;Acc:HGNC:1480]	CAPN3	protein_coding	53.5912	12.9626	58.8493	17.9741	51.7279	20.5922	26.0361	31.3677	31.2991	32.6565	74.7683	36.2875	86.2104	9.5758	38.6448	17.8913	46.4009	24.5047	5.67486	5.40954	71.7249	22.6453	23.2828	8.40589	20.7738	8.39662	50.111	36.2128
ENSG00000100934	1370.67	-0.415666	2.76286e-05	14	39031919	39109646	Sec23 homolog A, coat complex II component [Source:HGNC Symbol;Acc:HGNC:10701]	SEC23A	protein_coding	1725.47	1230.72	1789.32	1319.3	2029.27	1450.68	715.993	779.954	1270.42	645.32	1304.8	944.339	1569.26	1366.47	1466.86	1135.5	1938.69	1158.53	1479.25	1392.05	1922.66	1606.79	1636.64	1266.14	1351.45	1055.18	1797.5	1030.11
ENSG00000108839	120.896	-1.02403	2.80258e-05	17	6996065	7010736	arachidonate 12-lipoxygenase, 12S type [Source:HGNC Symbol;Acc:HGNC:429]	ALOX12	protein_coding	53.5912	59.7718	29.0522	9.88576	36.3493	12.0713	368.845	31.3677	15.2483	2.83969	110.329	30.2396	493.962	163.746	312.447	82.3	56.5511	27.2274	94.5809	21.6381	192.694	163.664	184.893	119.784	267.751	221.111	106.718	116.438
ENSG00000005175	337.992	0.485587	2.81105e-05	12	47661249	47706061	RNA polymerase II associated protein 3 [Source:HGNC Symbol;Acc:HGNC:26151]	RPAP3	protein_coding	322.359	344.948	258.49	337.913	164.271	312.433	318.942	313.677	267.246	394.007	186.009	258.332	157.276	406.971	295.18	472.331	287.106	428.831	228.886	263.264	291.182	357.178	361.568	532.723	545.889	715.112	261.691	379.956
ENSG00000204424	39.6659	-0.864207	2.88421e-05	6	31706885	31710595	lymphocyte antigen 6 complex, locus G6F [Source:HGNC Symbol;Acc:HGNC:13933]	LY6G6F	protein_coding	42.2234	33.8467	32.0319	11.6832	31.4562	13.4914	65.0903	24.5855	2.40762	0.709923	44.6786	15.5518	78.0554	40.2184	60.845	11.9275	33.3507	31.3115	62.4234	12.6223	69.5838	45.2906	71.2179	57.7905	71.5542	62.9747	51.967	31.7558
ENSG00000137675	7.4068	-1.46925	2.88601e-05	11	102691487	102705806	matrix metallopeptidase 27 [Source:HGNC Symbol;Acc:HGNC:14250]	MMP27	protein_coding	15.4278	2.16043	6.70435	0.898705	23.0678	2.13022	7.59386	2.54333	4.81525	1.41985	13.6771	0	41.9402	0.95758	4.11115	4.77102	33.3507	0	3.78324	0	22.4809	0	4.10873	1.05074	0	0	3.71193	6.68544
ENSG00000116663	288.6	-0.588059	2.90691e-05	1	11664124	11674354	F-box protein 6 [Source:HGNC Symbol;Acc:HGNC:13585]	FBXO6	protein_coding	258.212	126.745	280.093	271.409	277.513	235.745	277.718	144.122	218.291	190.969	233.423	232.413	306.396	159.916	202.268	103.77	313.206	127.969	266.718	191.137	1103.71	699.945	167.088	159.712	439.712	306.477	554.933	231.205
ENSG00000187257	1196.7	0.521993	2.91279e-05	7	77696443	77783022	round spermatid basic protein 1 like [Source:HGNC Symbol;Acc:HGNC:24765]	RSBN1L	protein_coding	1458.33	1646.25	957.977	1854.93	727.686	1490.45	715.993	1124.15	738.338	832.03	683.856	1082.58	717.643	1693	1066.43	1567.28	883.068	1607.78	998.775	1309.11	983.808	1503.85	1339.44	1406.94	1240.66	1564.57	1214.73	1098.08
ENSG00000180304	1949.99	0.503301	2.91279e-05	15	64687573	64703281	ornithine decarboxylase antizyme 2 [Source:HGNC Symbol;Acc:HGNC:8096]	OAZ2	protein_coding	1157.08	1561.27	1912.97	3158.95	1465.16	2449.05	1843.14	3085.06	1537.67	2218.51	1417.86	2270.56	1366.55	2913.92	1868.93	2454.69	1265.88	1577.83	1403.58	1525.49	617.69	1375.19	1512.01	1715.85	3021.43	4115.75	2082.39	1705.34
ENSG00000091436	889.869	-0.503464	2.91955e-05	2	173075435	173268010	Mitogen-activated protein kinase kinase kinase MLT [Source:UniProtKB/Swiss-Prot;Acc:Q9NYL2]	AC013461.1	protein_coding	859.083	574.674	1121.86	888.819	1560.23	1031.74	894.991	835.059	1530.45	732.64	1016.67	847.572	637.258	707.652	1016.28	787.218	1222.37	611.255	1413.04	809.627	795.397	554.81	588.918	556.89	804.408	520.591	1345.57	651.273
ENSG00000120913	142.333	0.513403	2.99458e-05	8	22578279	22598025	PDZ and LIM domain 2 [Source:HGNC Symbol;Acc:HGNC:13992]	PDLIM2	protein_coding	83.6348	128.906	113.974	134.806	58.7182	95.15	133.435	168.707	152.483	276.16	134.948	232.413	153.781	243.225	120.045	102.577	84.1017	156.558	85.1228	81.1431	74.9364	132.784	109.566	139.748	228.512	300.879	91.8702	167.136
ENSG00000124357	1134.21	0.343179	3.02198e-05	2	71064344	71079805	N-acetylglucosamine kinase [Source:HGNC Symbol;Acc:HGNC:17174]	NAGK	protein_coding	828.228	1053.57	1283.51	1663.5	729.084	1053.75	938.385	940.183	841.865	1311.94	790.538	1091.22	1064.82	1704.49	1058.21	1135.5	772.866	1045.53	807.721	977.323	920.648	1277.4	1072.38	1175.77	1567.27	1662.53	1328.87	1660.77
ENSG00000170190	138.159	0.61102	3.11525e-05	17	75087727	75106162	solute carrier family 16 member 5 [Source:HGNC Symbol;Acc:HGNC:10926]	SLC16A5	protein_coding	113.678	189.398	119.188	167.159	59.4172	165.447	92.2112	150.056	111.553	200.198	121.27	308.444	123.491	167.576	124.157	119.275	73.9515	133.414	68.0983	99.1748	71.7249	148.224	106.827	129.241	169.653	208.516	163.325	163.793
ENSG00000224195	5.79343	-1.32954	3.11756e-05	10	73813518	73814737		RP11-574K11.5	antisense	13.8038	0.720143	7.44928	1.79741	23.0678	2.8403	1.08484	0.847776	5.61779	0.709923	9.11808	5.18393	6.99003	2.87274	11.5112	2.38551	8.70018	2.72274	5.67486	1.80318	22.4809	6.17599	0	0	2.3082	2.79887	10.2078	3.34272
ENSG00000169967	6263.81	0.518027	3.13828e-05	2	127298730	127388465	mitogen-activated protein kinase kinase kinase 2 [Source:HGNC Symbol;Acc:HGNC:6854]	MAP3K2	protein_coding	6361.93	8948.49	3325.36	6641.43	2989.03	6230.19	3558.27	6351.54	4204.51	4308.52	3526.87	6060.01	4981.56	11324.3	9507.44	10150.3	5041.75	8441.85	6790.91	7187.47	4029.44	6048.35	6831.44	8312.37	5949.39	6854.44	5434.26	5995.17
ENSG00000075651	487.525	-0.484417	3.14976e-05	3	171600405	171810950	phospholipase D1 [Source:HGNC Symbol;Acc:HGNC:9067]	PLD1	protein_coding	591.127	398.239	603.391	443.062	649.395	521.195	400.305	314.525	653.268	412.465	393.901	422.49	848.124	310.256	491.693	366.175	627.863	355.317	658.283	490.465	565.235	373.647	461.547	322.576	379.699	305.077	691.346	600.018
ENSG00000255801	55.6193	1.18928	3.16735e-05	12	8548361	8567613		RP11-561P12.5	lincRNA	22.7357	162.752	73.7478	110.541	57.3201	56.806	36.8845	55.1054	10.433	23.4275	66.562	63.0711	13.9801	107.249	13.9779	76.3363	34.8007	149.751	7.56647	117.207	3.21156	58.6719	20.5436	53.5875	15.0033	6.99719	37.1193	101.953
ENSG00000134070	164.777	-0.776419	3.28448e-05	3	10164865	10243743	interleukin 1 receptor associated kinase 2 [Source:HGNC Symbol;Acc:HGNC:6113]	IRAK2	protein_coding	73.0789	87.1373	216.774	181.538	195.727	89.4694	186.592	108.515	96.3049	99.3892	237.982	91.5827	327.367	90.9701	190.757	48.9029	224.755	155.196	191.053	79.3399	292.252	200.72	128.74	127.139	400.473	141.343	226.428	124.238
ENSG00000153406	83.8713	0.665015	3.45756e-05	16	4461680	4495763	NmrA like redox sensor 1 [Source:HGNC Symbol;Acc:HGNC:24987]	NMRAL1	protein_coding	63.3351	96.4991	75.9826	87.1744	58.0191	107.931	101.975	110.211	131.617	129.916	50.1494	115.774	36.1152	74.6912	55.9116	94.2276	55.1011	96.6573	52.9653	124.419	22.4809	71.0239	38.3481	98.7692	106.177	139.944	70.5266	82.4538
ENSG00000129055	326.34	0.570396	3.54553e-05	3	134477706	134486716	anaphase promoting complex subunit 13 [Source:HGNC Symbol;Acc:HGNC:24540]	ANAPC13	protein_coding	291.504	470.253	438.017	532.033	176.854	416.104	266.87	367.935	226.317	294.618	248.012	370.651	188.731	423.25	337.114	333.971	165.303	273.635	278.068	420.141	250.502	457.023	206.806	516.962	311.607	365.253	268.187	241.79
ENSG00000130595	10.605	1.17531	3.54855e-05	11	1919562	1938706	troponin T3, fast skeletal type [Source:HGNC Symbol;Acc:HGNC:11950]	TNNT3	protein_coding	8.93187	30.9661	2.97971	8.08835	3.49513	9.94104	7.59386	16.1077	5.61779	22.0076	2.73542	5.18393	1.16501	27.7698	8.22229	9.54203	1.45003	6.80685	9.45809	12.6223	0	8.23465	6.84788	17.8625	17.3115	27.9887	4.63991	13.3709
ENSG00000170448	373.407	0.849467	3.56908e-05	4	47847233	47914667	nuclear transcription factor, X-box binding like 1 [Source:HGNC Symbol;Acc:HGNC:18726]	NFXL1	protein_coding	86.8827	87.1373	289.032	1259.98	65.0094	256.337	96.5506	116.145	184.584	247.053	429.462	504.569	45.4352	135.976	282.847	411.5	450.959	2419.15	344.275	771.761	67.4428	102.933	105.457	119.784	447.791	916.631	102.078	108.638
ENSG00000157881	151.736	0.4275	3.6023e-05	1	2508533	2526628	pantothenate kinase 4 [Source:HGNC Symbol;Acc:HGNC:19366]	PANK4	protein_coding	120.986	231.886	177.293	223.778	117.436	184.619	124.756	145.817	136.432	198.068	160.478	172.798	107.181	155.128	100.312	128.817	110.202	167.448	102.147	100.978	95.2763	142.048	113.675	156.56	196.197	254.698	144.765	178.836
ENSG00000147813	531.415	-0.54369	3.61513e-05	8	143574785	143578649	nicotinate phosphoribosyltransferase [Source:HGNC Symbol;Acc:HGNC:30450]	NAPRT	protein_coding	544.032	417.683	886.464	487.098	778.715	644.748	329.791	313.677	563.384	312.366	537.967	515.801	1416.65	668.391	398.781	197.997	510.41	194.676	419.939	360.636	920.648	564.074	427.308	400.33	612.827	509.395	578.133	367.699
ENSG00000105327	156.533	0.6449	3.6837e-05	19	47220822	47232766	BCL2 binding component 3 [Source:HGNC Symbol;Acc:HGNC:17868]	BBC3	protein_coding	57.6511	163.472	131.852	194.12	74.7958	156.216	175.744	293.33	156.495	195.229	77.5037	203.901	79.2204	158.958	111.823	78.7218	52.2011	80.3208	96.4726	164.089	95.2763	164.693	121.892	231.162	231.974	293.882	261.691	280.231
ENSG00000255031	92.348	0.625247	3.69172e-05	11	68050740	68053762		RP11-802E16.3	antisense	127.482	180.756	43.2058	59.3145	43.3396	73.1377	42.3087	60.1921	41.7321	107.908	80.2391	107.998	57.0853	147.467	41.9337	65.6015	120.352	183.785	22.6994	57.7017	66.3723	125.578	116.414	90.3633	90.0198	106.357	122.494	203.906
ENSG00000109436	163.287	0.718805	3.73092e-05	4	140620765	140756120	TBC1 domain family member 9 [Source:HGNC Symbol;Acc:HGNC:21710]	TBC1D9	protein_coding	102.31	287.337	128.128	117.73	151.689	203.791	226.731	271.288	366.761	367.03	108.505	179.709	58.2503	174.28	80.5785	171.757	163.853	266.828	37.8324	113.6	49.244	143.077	102.718	147.103	143.108	158.136	69.5986	181.064
ENSG00000157557	3874.97	-0.550463	3.73517e-05	21	38805307	38824955	ETS proto-oncogene 2, transcription factor [Source:HGNC Symbol;Acc:HGNC:3489]	ETS2	protein_coding	4240.2	3669.13	7573.68	4059.45	6328.28	5176.44	1533.96	1442.07	1116.33	895.923	9869.41	5362.77	3342.4	2624.73	4884.04	2661.03	5070.75	3163.82	5567.03	3521.61	2173.16	2459.07	2472.08	1597.12	3312.27	2184.52	9211.15	2986.72
ENSG00000238113	150.487	0.583478	3.76339e-05	9	62801461	62813486	long intergenic non-protein coding RNA 1410 [Source:HGNC Symbol;Acc:HGNC:50702]	LINC01410	lincRNA	115.302	103.701	51.4	107.845	67.1065	154.796	101.975	98.342	201.438	312.366	111.241	175.39	101.355	276.741	145.535	230.202	146.453	190.592	136.197	223.594	92.0648	138.96	143.805	161.813	132.722	212.714	115.07	164.908
ENSG00000136279	3844.75	-0.494842	3.76339e-05	7	44044640	44069456	drebrin like [Source:HGNC Symbol;Acc:HGNC:2696]	DBNL	protein_coding	4691.67	3111.02	5330.7	3815	6566.65	3781.86	2615.54	3593.72	3141.95	2298.73	4497.95	4404.61	5955.51	2754.96	3940.12	2529.83	4540.04	3163.82	4855.79	3988.63	4338.82	3091.08	3444.48	1985.89	4068.2	2801.67	5350.74	2993.96
ENSG00000065882	1450.98	0.41835	3.78105e-05	4	37891087	38139175	TBC1 domain family member 1 [Source:HGNC Symbol;Acc:HGNC:11578]	TBC1D1	protein_coding	1637.78	1962.39	1270.85	1561.95	1147.8	1709.15	1020.83	1397.13	1118.74	1204.03	924.573	1452.36	1071.81	1591.5	1535.1	2027.68	1067.22	1817.43	805.83	1274.85	801.82	1584.14	1703.75	1587.66	1793.47	2205.51	1618.4	1733.76
ENSG00000068028	268.974	0.504825	3.79918e-05	3	50329782	50340980	Ras association domain family member 1 [Source:HGNC Symbol;Acc:HGNC:9882]	RASSF1	protein_coding	229.793	265.733	246.571	299.269	138.407	281.9	263.616	253.485	337.87	454.351	234.335	269.564	138.636	331.323	151.29	287.454	165.303	298.14	175.921	274.083	199.117	291.301	230.089	321.525	342.768	410.035	278.395	361.014
ENSG00000035664	529.466	0.668595	3.93694e-05	15	63907036	64072033	death associated protein kinase 2 [Source:HGNC Symbol;Acc:HGNC:2675]	DAPK2	protein_coding	659.334	735.266	432.058	552.704	137.009	448.767	265.785	517.143	389.232	500.496	293.602	462.234	341.347	904.913	727.673	982.829	233.455	631.676	448.314	634.719	250.502	580.543	779.289	597.869	571.28	722.11	345.209	679.686
ENSG00000167768	927.428	-0.956356	3.93694e-05	12	52674736	52680407	keratin 1 [Source:HGNC Symbol;Acc:HGNC:6412]	KRT1	protein_coding	495.313	88.5776	526.664	370.267	2333.35	709.364	3725.33	8357.37	556.161	199.488	840.687	184.893	399.597	96.7156	1335.3	947.047	201.554	78.9594	1333.59	989.945	578.081	168.81	465.656	134.494	207.738	236.505	317.37	89.1392
ENSG00000267121	112.44	0.772858	3.94012e-05	17	45190931	45222222		CTD-2020K17.1	antisense	80.3868	115.223	23.8377	58.4158	61.5143	67.4571	110.653	84.7776	76.2414	183.16	41.0314	102.815	67.5703	205.88	105.245	153.865	118.902	121.162	96.4726	117.207	42.8208	148.224	90.392	152.357	107.331	195.921	97.4381	322.015
ENSG00000198960	72.954	-0.687587	3.95812e-05	X	101615118	101618001	armadillo repeat containing, X-linked 6 [Source:HGNC Symbol;Acc:HGNC:26094]	ARMCX6	protein_coding	82.0108	62.6524	84.9218	40.4417	97.8636	44.0246	83.5325	43.2366	81.0566	36.916	75.6801	38.8795	100.19	73.7337	74.8229	27.4333	89.9018	61.2616	75.6647	32.4572	122.039	54.5546	83.5441	107.175	85.4034	96.5612	113.214	73.5398
ENSG00000185168	23.1481	1.0208	3.97152e-05	17	81303771	81309248	long intergenic non-protein coding RNA 482 [Source:HGNC Symbol;Acc:HGNC:26816]	LINC00482	lincRNA	19.4877	33.8467	19.3681	40.4417	25.864	41.8944	9.76354	11.0211	16.8534	16.3282	3.64723	32.8315	25.6301	47.879	3.28892	33.3971	18.8504	46.2866	1.89162	16.2286	9.63469	40.1439	12.3262	25.2177	12.6951	30.7876	21.3436	31.1987
ENSG00000147174	69.305	0.646066	3.98811e-05	X	71578411	71613583	acidic repeat containing [Source:HGNC Symbol;Acc:HGNC:15805]	ACRC	protein_coding	79.5748	66.2531	38.7362	63.8081	56.6211	86.6291	80.278	133.101	44.9423	63.8931	45.5904	69.983	31.4552	103.419	41.9337	79.9145	79.7516	123.885	83.2312	91.9621	27.8335	56.6132	67.1092	97.7184	39.2394	55.9775	38.0473	93.039
ENSG00000143252	542.876	-0.476097	4.09894e-05	1	161314257	161375340	succinate dehydrogenase complex subunit C [Source:HGNC Symbol;Acc:HGNC:10682]	SDHC	protein_coding	485.569	414.082	863.371	577.867	531.26	460.838	466.48	432.366	478.314	347.152	793.273	738.71	820.164	366.753	709.584	640.509	623.513	462.866	669.633	501.284	645.524	497.167	410.873	199.64	489.339	293.882	839.824	440.682
ENSG00000071127	4824.34	-0.392306	4.14724e-05	4	10074339	10116949	WD repeat domain 1 [Source:HGNC Symbol;Acc:HGNC:12754]	WDR1	protein_coding	3886.17	3648.24	5266.64	3876.12	4791.12	3271.31	6229.14	4132.06	3939.67	3169.81	5837.4	4980.03	10472.2	4713.21	6468.48	4601.65	4107.93	2982.76	4617.44	4149.11	5612.74	4626.85	3808.79	3423.3	5944.77	5229.7	6612.8	4682.04
ENSG00000248323	202.783	0.998141	4.1824e-05	5	91303029	91314402	lung cancer associated transcript 1 (non-protein coding) [Source:HGNC Symbol;Acc:HGNC:48498]	LUCAT1	lincRNA	184.321	276.535	96.8406	168.058	135.611	154.796	150.792	183.12	117.974	533.862	59.2675	177.982	38.4452	364.838	224.469	194.419	178.354	487.37	64.315	160.483	14.9873	188.368	154.762	224.857	263.135	365.253	133.629	381.07
ENSG00000142583	88.3477	0.737137	4.25417e-05	1	9035107	9088478	solute carrier family 2 member 5 [Source:HGNC Symbol;Acc:HGNC:11010]	SLC2A5	protein_coding	21.9237	51.8503	30.542	26.9612	22.3688	47.575	273.379	311.134	101.12	260.542	18.2362	32.8315	11.6501	35.4305	14.8001	34.5899	49.301	54.4548	287.526	274.083	28.9041	47.3493	32.8698	69.3486	43.8558	88.1646	54.7509	148.194
ENSG00000172927	6.06538	-1.28227	4.40456e-05	11	69294138	69367726	myeloma overexpressed [Source:HGNC Symbol;Acc:HGNC:7563]	MYEOV	protein_coding	12.9918	2.88057	3.72464	1.79741	21.6698	2.13022	11.9332	3.3911	0.802541	0	7.29446	0.863988	12.8151	1.91516	5.75561	4.77102	13.0503	5.44548	7.56647	1.80318	12.8462	5.14666	13.6958	6.30442	1.1541	1.39944	5.56789	1.11424
ENSG00000283378	11.872	1.12791	4.42221e-05	9	61330717	61453030		CH17-296N19.1	protein_coding	8.93187	15.123	3.72464	9.88576	9.08733	21.3022	5.42419	12.7166	12.8407	17.7481	0	16.4158	10.4851	22.9819	6.57783	15.5058	4.35009	29.9501	11.3497	30.654	0	1.02933	15.0653	16.8118	3.4623	15.3938	2.78395	12.8138
ENSG00000132155	2214.71	0.37988	4.54646e-05	3	12583601	12664226	Raf-1 proto-oncogene, serine/threonine kinase [Source:HGNC Symbol;Acc:HGNC:9829]	RAF1	protein_coding	2025.1	2730.06	1965.86	2581.98	1927.21	2232.47	1495.99	2373.77	1391.61	2047.42	1603.87	2762.17	1997.98	3147.57	2361.44	2640.76	2224.34	3244.14	2046.73	2138.57	1494.45	2256.29	2269.39	2144.55	2240.11	2541.38	1887.51	2239.07
ENSG00000162711	806.26	-0.668327	4.55258e-05	1	247416156	247449108	NLR family pyrin domain containing 3 [Source:HGNC Symbol;Acc:HGNC:16400]	NLRP3	protein_coding	667.454	549.469	1597.87	798.05	1426.01	694.453	428.511	314.525	959.036	641.06	1480.78	836.34	725.799	540.075	1377.23	411.5	1724.08	506.43	440.747	393.093	457.112	437.466	816.267	894.176	826.336	635.345	1402.18	593.89
ENSG00000198814	1926.81	-0.576174	4.56029e-05	X	30653359	30731456	glycerol kinase [Source:HGNC Symbol;Acc:HGNC:4289]	GK	protein_coding	2113.6	1020.44	2266.81	1669.79	2141.81	1944.18	1796.49	927.467	937.368	1104.64	3360.92	1873.99	1661.3	1811.74	2990.45	1611.41	3690.32	1583.27	2209.41	1851.86	2569.25	1576.94	1343.55	1133.74	2653.28	1563.17	3169.06	1374.42
ENSG00000163214	134.177	0.584923	4.61109e-05	2	38797729	38875934	DExH-box helicase 57 [Source:HGNC Symbol;Acc:HGNC:20086]	DHX57	protein_coding	98.2505	186.517	99.8203	104.25	97.1646	168.288	161.641	145.817	268.049	269.061	69.2974	101.951	89.7054	150.34	74.8229	175.335	95.7019	185.146	62.4234	133.435	93.1353	146.165	71.2179	156.56	144.263	176.329	94.6541	137.609
ENSG00000035403	4520.37	-0.541313	4.6274e-05	10	73995193	74121363	vinculin [Source:HGNC Symbol;Acc:HGNC:12665]	VCL	protein_coding	4764.75	5866.28	4500.85	2747.34	3771.94	1904.42	7297.7	4114.26	2244.71	1771.26	5801.83	2801.05	8374.06	3929.91	7578.49	4893.87	4358.79	3617.16	3970.51	2266.6	5938.18	3423.56	5865.89	3607.18	5743.96	5858.04	4743.84	4814.07
ENSG00000188419	253.787	-0.362315	4.64615e-05	X	85861180	86047562	CHM, Rab escort protein 1 [Source:HGNC Symbol;Acc:HGNC:1940]	CHM	protein_coding	336.975	234.767	388.852	274.105	274.018	218.703	167.065	125.471	322.621	217.946	315.486	262.652	332.027	234.607	272.98	255.249	333.507	209.651	261.043	230.807	312.592	240.864	238.306	250.075	197.351	163.734	252.411	182.178
ENSG00000186814	114.063	-0.702267	4.64615e-05	18	35251058	35290245	zinc finger and SCAN domain containing 30 [Source:HGNC Symbol;Acc:HGNC:33517]	ZSCAN30	protein_coding	172.141	61.2121	160.159	94.364	92.2714	120.713	69.4296	53.4099	171.744	83.7709	155.919	174.526	226.011	83.3095	120.045	93.0348	165.303	88.489	134.305	100.978	137.027	63.8186	99.979	54.6383	92.328	51.7792	199.516	73.5398
ENSG00000129450	1746.72	-0.631536	4.69218e-05	19	51124908	51136651	sialic acid binding Ig like lectin 9 [Source:HGNC Symbol;Acc:HGNC:10878]	SIGLEC9	protein_coding	2305.23	1454.69	3035.58	2170.37	2587.79	1556.48	976.354	1275.05	1178.93	1058.49	2297.76	2848.57	3583.56	1124.2	1557.3	1046.05	3005.91	1501.59	2044.84	1069.29	2191.36	1204.32	1517.49	772.291	1374.53	783.685	2313.46	1073.01
ENSG00000254521	14.1889	-1.23605	4.71411e-05	19	51491357	51501789	sialic acid binding Ig like lectin 12 (gene/pseudogene) [Source:HGNC Symbol;Acc:HGNC:15482]	SIGLEC12	protein_coding	0	1.44029	8.93913	2.69612	74.7958	12.7813	16.2726	6.78221	2.40762	0.709923	32.8251	1.72798	55.9203	13.4061	23.0224	14.313	11.6002	0	5.67486	3.60636	4.28208	4.11733	4.10873	1.05074	1.1541	1.39944	67.7427	24.5133
ENSG00000122547	171.244	0.817612	4.74026e-05	7	36153149	36301543	endonuclease/exonuclease/phosphatase family domain containing 1 [Source:HGNC Symbol;Acc:HGNC:22223]	EEPD1	protein_coding	142.91	244.128	70.0232	177.045	27.262	161.187	122.587	163.621	123.591	216.526	83.8863	273.884	58.2503	179.067	180.068	161.022	71.0514	182.424	122.955	182.121	40.6798	139.989	206.806	229.06	365.85	454.817	199.516	214.491
ENSG00000100034	1273.87	0.743726	4.77081e-05	22	21919420	21952837	protein phosphatase, Mg2+/Mn2+ dependent 1F [Source:HGNC Symbol;Acc:HGNC:19388]	PPM1F	protein_coding	825.792	1305.62	507.296	896.009	304.775	1361.21	940.554	823.19	1111.52	1686.07	1174.41	2506.43	852.784	3452.08	1606.64	1780.78	542.311	1157.16	828.529	1292.88	372.541	1092.12	1083.33	1451.07	1881.18	2020.79	1235.14	1576.09
ENSG00000126262	2341.36	-0.722942	4.98365e-05	19	35443907	35451767	free fatty acid receptor 2 [Source:HGNC Symbol;Acc:HGNC:4501]	FFAR2	protein_coding	1814.79	1351.71	3349.94	2633.21	5825.68	1384.65	2166.42	1119.06	942.986	827.77	3111.09	2490.88	3180.47	2006.13	2684.58	919.613	5707.31	1641.81	2092.13	766.351	2790.85	2144.1	1598.29	1653.86	3755.44	3383.84	2612.27	1602.83
ENSG00000111110	58.4649	0.966686	4.99671e-05	12	62643982	62935037	protein phosphatase, Mg2+/Mn2+ dependent 1H [Source:HGNC Symbol;Acc:HGNC:18583]	PPM1H	protein_coding	69.019	106.581	40.2261	67.4029	15.3786	41.1843	31.4603	65.2787	47.3499	49.6946	33.7369	88.1268	13.9801	114.91	50.9782	143.13	11.6002	66.7071	24.591	50.489	14.9873	96.7572	84.9137	58.8412	45.0099	53.1786	52.895	98.6102
ENSG00000215458	37.9766	0.836211	5.00337e-05	21	43805758	43812567	apoptosis associated transcript in bladder cancer [Source:HGNC Symbol;Acc:HGNC:51526]	AATBC	antisense	15.4278	25.205	20.113	28.7586	17.4756	54.6757	26.0361	30.5199	69.8211	69.5724	23.707	56.1592	29.1251	57.4548	15.6224	21.4696	13.0503	34.0342	9.45809	21.6381	16.0578	38.0853	16.4349	49.3846	80.787	92.3629	25.0555	105.853
ENSG00000198818	700.704	-0.322189	5.03576e-05	6	166319728	166342591	SFT2 domain containing 1 [Source:HGNC Symbol;Acc:HGNC:21102]	SFT2D1	protein_coding	807.928	656.05	834.319	649.764	960.461	687.352	476.244	431.518	489.55	408.206	853.452	585.784	919.189	693.288	780.296	621.425	738.065	526.85	762.322	750.122	955.975	817.289	709.44	664.065	708.618	635.345	927.982	568.82
ENSG00000143553	284.487	-0.519942	5.06405e-05	1	153658654	153661830	SNAP associated protein [Source:HGNC Symbol;Acc:HGNC:17145]	SNAPIN	protein_coding	413.302	182.196	554.226	296.573	370.484	300.362	228.901	170.403	369.169	223.626	344.663	221.181	407.752	233.65	272.158	261.213	229.105	171.533	200.512	248.839	405.727	251.157	212.284	180.727	260.827	215.513	492.758	246.804
ENSG00000148175	15316.7	-0.747547	5.08502e-05	9	121338988	121370304	stomatin [Source:HGNC Symbol;Acc:HGNC:3383]	STOM	protein_coding	17190.6	8153.46	15903.5	11690.4	37465	12444.8	14790.7	25294.2	8716.4	2733.91	13197.5	11150.6	30662.9	9567.18	12996.2	11471.9	19769.7	7042.37	29414.7	18839.6	22782.8	14545.5	19782.2	7590.52	9113.93	7330.25	18338.8	10888.9
ENSG00000108433	168.691	-0.507969	5.1624e-05	17	46923117	46967019	golgi SNAP receptor complex member 2 [Source:HGNC Symbol;Acc:HGNC:4431]	GOSR2	protein_coding	159.962	102.98	237.632	159.97	286.601	142.725	164.895	151.752	213.476	163.992	239.806	177.982	264.456	119.697	111.823	122.854	179.804	104.825	213.753	156.877	281.547	151.312	127.371	90.3633	120.026	118.952	206.94	150.98
ENSG00000196227	1143.89	-0.740733	5.21155e-05	20	59933764	59948680	family with sequence similarity 217 member B [Source:HGNC Symbol;Acc:HGNC:16170]	FAM217B	protein_coding	1443.71	869.212	995.968	1215.05	2008.3	892.564	500.11	897.794	1002.37	379.099	983.841	989.266	2515.25	763.191	2960.85	1502.87	2096.74	860.386	1804.6	1121.58	1051.25	476.58	1042.25	504.353	971.752	516.392	1124.71	538.735
ENSG00000115271	27601.3	-0.574036	5.31988e-05	2	162318840	162371595	grancalcin [Source:HGNC Symbol;Acc:HGNC:15990]	GCA	protein_coding	39353.8	19041.3	33521.7	23326.8	47189.8	21986.7	9865.51	16789.3	14286	8151.33	28620.7	19717.9	38280.9	32918.7	43887.3	32095.8	47681.3	23587.1	39534.8	34934.8	37513.2	19626.3	35059.8	20135.3	19353.1	12555.8	34205.4	19616.8
ENSG00000125844	1034	-0.715679	5.41947e-05	20	17613678	17682295	ribosome binding protein 1 [Source:HGNC Symbol;Acc:HGNC:10448]	RRBP1	protein_coding	1086.44	796.478	1737.92	924.768	1649.7	1200.03	827.731	1326.77	1286.47	570.068	1224.56	1113.68	1473.73	305.468	984.209	636.931	1307.93	721.526	1248.47	762.745	1245.02	623.775	855.985	292.105	1499.18	981.006	1462.5	806.71
ENSG00000010295	152.394	0.63061	5.47463e-05	12	6538375	6556083	intermediate filament family orphan 1 [Source:HGNC Symbol;Acc:HGNC:24970]	IFFO1	protein_coding	146.158	215.323	102.8	192.323	61.5143	188.88	117.162	172.946	207.858	217.946	127.653	235.869	100.19	238.437	88.8008	126.432	79.7516	168.81	62.4234	124.419	83.5006	162.634	110.936	135.545	200.813	207.117	206.94	183.85
ENSG00000111640	31233.1	-0.507055	5.47463e-05	12	6533927	6538374	glyceraldehyde-3-phosphate dehydrogenase [Source:HGNC Symbol;Acc:HGNC:4141]	GAPDH	protein_coding	35973.5	20223	41943.2	22925.1	29657.6	31062.9	25385.2	26020.8	30411.5	14963.8	31906	26133.9	44744.4	18828.9	31627.9	23095.3	31232.2	24157.5	51875.8	48229.6	40792.2	33923.7	28804.9	17926.6	35547.4	26098.1	52429.1	28607.6
ENSG00000171643	61.0175	0.963357	5.5244e-05	5	76850001	76921650	S100 calcium binding protein Z [Source:HGNC Symbol;Acc:HGNC:30367]	S100Z	protein_coding	62.5231	79.2157	40.2261	99.7563	18.1747	80.2384	41.2238	24.5855	41.7321	57.5038	28.2661	127.006	11.6501	71.8185	31.2447	67.987	29.0006	46.2866	15.1329	52.2922	17.1283	102.933	43.8264	96.6677	90.0198	149.74	90.9422	91.3677
ENSG00000163823	1715.63	-0.87513	5.57483e-05	3	46201709	46208396	C-C motif chemokine receptor 1 [Source:HGNC Symbol;Acc:HGNC:1602]	CCR1	protein_coding	1008.49	304.62	1641.08	584.158	2033.47	969.252	2285.75	319.611	2003.94	1506.46	3268.83	2512.48	2863.58	2041.56	2509.44	1242.85	2989.96	396.159	834.204	494.071	1540.48	1436.95	1032.66	1120.08	2894.48	1967.61	4030.22	2205.08
ENSG00000203709	231.235	0.864519	5.6367e-05	1	207801518	207879096	chromosome 1 open reading frame 132 [Source:HGNC Symbol;Acc:HGNC:32018]	C1orf132	lincRNA	217.613	209.562	166.864	207.601	67.1065	184.619	195.271	184.815	113.158	680.816	340.104	403.482	103.686	487.408	174.313	271.948	204.454	588.112	87.0145	219.988	54.5966	173.957	110.936	134.494	216.971	247.7	118.782	309.202
ENSG00000049089	42.1182	1.04402	5.69053e-05	1	40300487	40317816	collagen type IX alpha 2 chain [Source:HGNC Symbol;Acc:HGNC:2218]	COL9A2	protein_coding	20.2997	93.6186	22.3478	32.3534	39.8445	31.2433	23.8664	16.9555	1.60508	12.0687	42.855	66.5271	24.4651	193.431	13.9779	53.6739	17.4004	40.8411	9.45809	9.01589	4.28208	20.5866	19.1741	48.3339	9.2328	19.5921	70.5266	221.734
ENSG00000169896	7136.98	-0.587944	5.71141e-05	16	31259990	31332892	integrin subunit alpha M [Source:HGNC Symbol;Acc:HGNC:6149]	ITGAM	protein_coding	6836.94	5035.96	6286.44	3323.41	5151.12	3720.08	4618.15	3542.85	5737.36	3448.1	12912.1	12134.7	21017.9	5718.67	9772.2	7801.8	8400.02	4292.4	9893.17	6253.42	9122.98	7740.57	7529.93	3226.81	6960.38	5191.91	6919.03	7247.02
ENSG00000104974	454.499	0.594859	5.86375e-05	19	54573879	54602090	leukocyte immunoglobulin like receptor A1 [Source:HGNC Symbol;Acc:HGNC:6602]	LILRA1	protein_coding	375.95	529.305	540.073	905.895	306.872	527.585	351.487	533.251	355.526	760.327	516.083	1206.99	375.132	637.748	400.426	359.019	255.205	518.682	166.462	247.036	153.084	390.117	319.111	300.51	522.807	436.624	300.666	433.996
ENSG00000105383	173.047	0.702121	5.92771e-05	19	51225064	51243860	CD33 molecule [Source:HGNC Symbol;Acc:HGNC:1659]	CD33	protein_coding	185.945	285.897	123.658	158.172	81.786	134.204	65.0903	66.9743	405.283	393.297	112.152	146.014	172.421	295.892	97.0231	219.467	72.5015	204.205	68.0983	243.429	65.3018	223.365	80.805	179.676	242.361	229.508	112.286	180.507
ENSG00000235290	9.02795	1.23302	5.94628e-05	6	29956596	29958570	major histocompatibility complex, class I, W (pseudogene) [Source:HGNC Symbol;Acc:HGNC:23425]	HLA-W	unprocessed_pseudogene	0.811988	12.2424	2.97971	11.6832	7.68928	10.6511	8.6787	13.5644	1.60508	30.5267	2.73542	2.59196	4.66002	26.8122	3.28892	10.7348	10.1502	38.1184	5.67486	5.40954	3.21156	9.26398	2.73915	7.35515	2.3082	5.59775	2.78395	8.91392
ENSG00000203721	35.8888	0.858353	5.94628e-05	1	200253419	200400705	long intergenic non-protein coding RNA 862 [Source:HGNC Symbol;Acc:HGNC:21901]	LINC00862	lincRNA	32.4795	47.5294	11.9188	25.1637	30.7571	31.9534	32.5451	28.8244	13.6432	53.2442	31.9133	55.2952	26.7951	100.546	18.9113	26.2406	58.0012	137.498	17.0246	36.0636	10.7052	25.7333	19.1741	33.6236	19.6197	23.7904	10.2078	45.6838
ENSG00000127920	1095.06	-0.737787	5.94628e-05	7	93921699	93928610	G protein subunit gamma 11 [Source:HGNC Symbol;Acc:HGNC:4403]	GNG11	protein_coding	1502.18	1328.66	719.6	599.436	1305.78	318.113	1727.06	612.942	162.916	67.4427	643.737	152.926	1548.29	1152.93	1504.68	870.71	1953.19	1161.25	1163.35	416.534	1222.53	930.516	2115.99	1919.69	1658.44	1596.76	1315.88	990.002
ENSG00000231113	32.0879	0.883574	5.94844e-05	6	42940364	42948360		RP3-475N16.1	antisense	29.2316	43.9287	26.8174	35.0495	9.08733	24.8526	20.6119	55.9532	24.0762	78.0915	21.8834	69.119	33.7852	59.37	18.9113	23.8551	13.0503	44.9252	15.1329	32.4572	9.63469	29.8506	30.1307	17.8625	25.3902	25.1899	19.4876	60.7261
ENSG00000196154	7720.95	0.809993	6.215e-05	1	153543613	153550136	S100 calcium binding protein A4 [Source:HGNC Symbol;Acc:HGNC:10494]	S100A4	protein_coding	5277.92	9650.63	9432.27	16587.4	3605.57	13549.6	5419.85	4700.92	8155.42	8764.71	2958.82	7827.73	2430.2	9621.76	4387.42	7539.4	5147.6	7640.01	2137.53	5934.26	3108.79	16299.5	5916.57	9498.65	9322.82	10069	11069	10133.5
ENSG00000226328	70.122	0.69143	6.32307e-05	22	45133020	45163781	NUP50 antisense RNA 1 (head to head) [Source:HGNC Symbol;Acc:HGNC:50502]	NUP50-AS1	lincRNA	32.4795	45.369	20.858	36.8469	18.8737	38.344	62.9206	81.3865	113.961	185.29	46.5022	79.4869	27.9601	113.952	69.0673	75.1435	24.6505	72.1526	51.0737	66.7176	16.0578	47.3493	68.4788	105.074	116.564	177.729	84.4463	84.6822
ENSG00000085733	559.477	-0.717821	6.32307e-05	11	70398404	70436584	cortactin [Source:HGNC Symbol;Acc:HGNC:3338]	CTTN	protein_coding	649.59	660.371	316.594	255.232	592.075	156.926	978.524	429.822	77.0439	41.1755	338.281	177.982	753.759	330.365	799.207	460.403	616.262	471.034	711.249	158.68	1600.43	829.641	783.397	594.717	880.579	915.232	564.213	522.579
ENSG00000163736	14487.5	-0.76041	6.52768e-05	4	73987038	73988197	pro-platelet basic protein [Source:HGNC Symbol;Acc:HGNC:9240]	PPBP	protein_coding	21864.4	20588.2	12511.8	12707.7	14587.3	4677.26	21867.1	6033.62	2169.27	1206.87	15193.5	3093.94	25428.6	15277.2	25250.7	10920.9	20773.1	14327.1	15656.9	5279.71	17651.8	11498.7	22339.1	18725.2	19026.5	19124.7	15651.3	12218.8
ENSG00000279884	16.6021	1.26139	6.62432e-05	2	174545385	174546335		RP11-483E17.1	TEC	20.2997	14.4029	3.72464	13.4806	6.29123	17.7519	14.1029	11.8689	5.61779	53.9541	9.11808	37.1515	0	40.2184	4.11115	23.8551	18.8504	65.3457	0	16.2286	0	6.17599	4.10873	10.5074	13.8492	18.1927	8.35184	27.2989
ENSG00000102738	160.002	-0.461596	6.68003e-05	13	40729135	40771173	mitochondrial ribosomal protein S31 [Source:HGNC Symbol;Acc:HGNC:16632]	MRPS31	protein_coding	202.185	112.342	233.907	134.806	183.145	161.897	142.114	131.405	149.273	119.267	170.508	104.543	229.506	152.255	213.78	187.262	221.854	106.187	151.329	151.467	200.187	131.754	190.371	130.291	131.567	117.553	185.596	133.709
ENSG00000101336	12455.7	-0.485161	6.69647e-05	20	32052188	32101856	HCK proto-oncogene, Src family tyrosine kinase [Source:HGNC Symbol;Acc:HGNC:4840]	HCK	protein_coding	15502.5	7160.38	19782.3	14503.3	16476	15642.2	6165.13	8219.18	10883.3	8057.62	14975.5	13642.4	14684.9	8849.95	10402.8	6448.03	16118.5	9110.29	15011.9	10508.9	13485.3	9375.15	11546.9	8503.61	19905.9	13956.6	19667.6	10173.6
ENSG00000128872	308.252	0.717206	6.72844e-05	15	51751561	51816368	tropomodulin 2 [Source:HGNC Symbol;Acc:HGNC:11872]	TMOD2	protein_coding	179.449	200.92	294.246	653.359	99.9607	363.558	174.659	157.686	426.149	916.51	285.396	355.963	171.256	637.748	97.8453	199.19	246.505	295.417	145.655	259.658	326.509	321.151	127.371	321.525	297.758	344.262	264.475	466.867
ENSG00000182541	3070.56	-0.50286	6.80764e-05	22	31212239	31280080	LIM domain kinase 2 [Source:HGNC Symbol;Acc:HGNC:6614]	LIMK2	protein_coding	2856.57	2054.57	2289.91	2174.87	4103.28	2045.01	2709.92	1867.65	1848.25	2143.26	3969.1	4668.13	5984.63	3447.29	4589.68	2498.82	5151.95	2671.01	3945.92	2097.1	3348.59	2599.06	2611.78	1696.94	4339.42	2840.86	3148.64	2273.61
ENSG00000090372	156.378	0.669037	6.86208e-05	19	46719507	46746994	striatin 4 [Source:HGNC Symbol;Acc:HGNC:15721]	STRN4	protein_coding	131.542	140.428	69.2783	114.136	54.524	120.713	205.034	150.056	105.935	264.801	175.067	508.889	173.586	355.262	167.735	178.913	87.0018	152.473	71.8815	91.9621	66.3723	127.637	84.9137	123.987	141.954	190.323	94.6541	229.533
ENSG00000165704	166.503	-0.579856	6.90605e-05	X	134460153	134520513	hypoxanthine phosphoribosyltransferase 1 [Source:HGNC Symbol;Acc:HGNC:5157]	HPRT1	protein_coding	251.716	157.711	266.684	190.525	210.407	149.826	131.265	133.101	151.68	92.29	219.746	104.543	315.717	125.443	205.557	182.491	189.954	92.5731	157.004	156.877	239.797	116.314	142.436	134.494	132.722	117.553	202.3	91.3677
ENSG00000171298	659.491	0.744056	6.93905e-05	17	80101556	80119879	glucosidase alpha, acid [Source:HGNC Symbol;Acc:HGNC:4065]	GAA	protein_coding	539.16	987.316	549.757	1109	276.115	887.593	327.621	861.34	606.721	752.518	713.034	2463.23	262.126	566.887	362.603	535.547	247.955	694.299	423.723	488.661	254.784	638.186	614.939	439.208	775.555	720.71	663.507	703.643
ENSG00000240401	13.3939	1.10074	6.99124e-05	2	55282350	55346049		AC012358.8	antisense	11.3678	15.8431	5.21449	22.4676	1.39805	19.8821	10.8484	8.47776	5.61779	12.0687	7.29446	12.9598	5.82503	22.9819	4.11115	13.1203	10.1502	28.5888	3.78324	7.21272	2.14104	26.7626	12.3262	26.2684	18.4656	32.1871	9.27982	18.385
ENSG00000143753	1057.47	-0.524575	7.03884e-05	1	224175756	224193441	delta 4-desaturase, sphingolipid 1 [Source:HGNC Symbol;Acc:HGNC:13709]	DEGS1	protein_coding	808.74	657.49	935.629	700.99	1586.09	764.75	803.865	906.272	1018.42	577.167	759.536	613.431	1714.89	789.046	1267.88	664.364	1958.99	1202.09	1749.75	1105.35	2059.68	976.836	1249.05	1032.87	955.595	961.413	921.486	867.436
ENSG00000128284	261.021	0.547046	7.17974e-05	22	36140330	36166177	apolipoprotein L3 [Source:HGNC Symbol;Acc:HGNC:14868]	APOL3	protein_coding	141.286	196.599	139.301	260.624	205.514	342.256	300.5	515.448	296.138	450.801	101.211	109.726	73.3954	136.934	155.401	163.407	281.306	243.685	204.295	239.823	263.348	610.394	156.132	332.033	442.02	470.211	167.037	309.759
ENSG00000174405	661.192	-0.462153	7.20291e-05	13	108207439	108218368	DNA ligase 4 [Source:HGNC Symbol;Acc:HGNC:6601]	LIG4	protein_coding	817.672	599.879	883.484	654.257	926.209	614.214	377.524	373.869	593.88	318.045	706.651	538.264	923.849	673.179	1073.01	756.206	1003.42	471.034	567.486	607.671	854.275	678.329	672.462	624.137	534.348	411.435	851.887	406.698
ENSG00000260078	397.893	0.39005	7.21324e-05	16	53364982	53373083		RP11-44F14.1	transcribed_unprocessed_pseudogene	392.19	393.198	335.217	545.514	438.289	495.632	223.477	306.047	231.934	400.396	209.716	318.812	305.231	485.493	538.56	541.51	387.158	502.345	264.827	351.62	240.867	284.096	462.917	625.188	432.788	649.339	367.481	411.155
ENSG00000134256	114.826	0.71931	7.22112e-05	1	117001750	117036476	CD101 molecule [Source:HGNC Symbol;Acc:HGNC:5949]	CD101	protein_coding	149.406	128.185	45.4406	73.6938	35.6503	192.43	145.368	272.984	122.789	185.29	72.9446	108.862	32.6202	72.7761	79.7562	106.155	50.751	119.801	62.4234	135.238	61.0197	146.165	91.7616	107.175	165.036	198.72	101.15	151.537
ENSG00000142208	837.792	0.424836	7.30881e-05	14	104769349	104795751	AKT serine/threonine kinase 1 [Source:HGNC Symbol;Acc:HGNC:391]	AKT1	protein_coding	675.574	1093.18	791.113	946.336	578.793	984.873	712.738	844.385	780.872	900.182	972.899	1323.63	468.332	996.841	724.384	895.758	522.011	873.999	484.254	687.011	581.293	706.121	720.397	922.546	1053.69	1407.83	962.317	846.822
ENSG00000124145	35.1514	-0.929542	7.35195e-05	20	45325288	45348424	syndecan 4 [Source:HGNC Symbol;Acc:HGNC:10661]	SDC4	protein_coding	31.6675	43.2086	35.0116	9.88576	104.155	17.7519	40.139	19.4988	17.6559	12.0687	63.8266	13.8238	73.3954	14.3637	64.9561	32.2044	55.1011	35.3956	37.8324	23.4413	34.2567	24.704	28.7611	22.0655	40.3935	25.1899	41.7592	21.7277
ENSG00000181026	116.268	0.760776	7.36998e-05	15	88621296	88632282	apoptosis enhancing nuclease [Source:HGNC Symbol;Acc:HGNC:25722]	AEN	protein_coding	29.2316	83.5366	44.6957	201.31	65.7084	117.162	152.962	344.197	85.8719	108.618	50.1494	127.87	41.9402	68.9458	83.0452	110.926	63.8013	111.632	244.019	173.105	74.9364	102.933	123.262	153.407	75.0165	96.5612	73.3106	247.361
ENSG00000279873	14.4972	1.06391	7.47294e-05	2	43227210	43228855	long intergenic non-protein coding RNA 1126 [Source:HGNC Symbol;Acc:HGNC:49275]	LINC01126	lincRNA	8.93187	22.3244	9.68406	15.278	2.7961	14.2015	13.0181	16.1077	17.6559	37.6259	6.38266	15.5518	3.49502	35.4305	11.5112	15.5058	1.45003	21.7819	11.3497	9.01589	3.21156	18.528	9.58703	18.9132	11.541	16.7932	9.27982	28.9702
ENSG00000134371	969.111	-0.435194	7.47499e-05	1	193122017	193253901	cell division cycle 73 [Source:HGNC Symbol;Acc:HGNC:16783]	CDC73	protein_coding	1062.89	856.97	1388.55	1075.75	1499.41	928.777	647.648	790.975	626.784	535.282	1042.2	908.915	1295.49	725.846	1380.52	1135.5	1570.38	969.295	1142.54	879.951	1177.57	762.735	981.986	610.478	848.264	715.112	1042.12	533.164
ENSG00000010270	552.654	-0.479929	7.47499e-05	7	38178222	38230671	STARD3 N-terminal like [Source:HGNC Symbol;Acc:HGNC:19169]	STARD3NL	protein_coding	593.563	370.153	1012.36	517.654	642.405	551.728	470.82	316.22	516.836	318.045	744.035	477.785	630.268	639.663	473.604	460.403	678.614	352.595	471.013	423.747	730.095	564.074	640.961	570.55	513.575	412.834	951.181	429.54
ENSG00000226031	13.0139	-1.17837	7.50276e-05	X	138711452	138716617	FGF13 antisense RNA 1 [Source:HGNC Symbol;Acc:HGNC:44264]	FGF13-AS1	antisense	39.7874	6.48128	8.93913	2.69612	9.08733	7.81082	2.16968	0	9.63049	0	44.6786	16.4158	37.2802	10.5334	19.7335	19.0841	2.90006	1.36137	0	0	46.0324	16.4693	30.1307	6.30442	11.541	1.39944	8.35184	5.5712
ENSG00000232442	30.2875	1.07076	7.55239e-05	20	63627227	63628824		CTD-3184A7.4	antisense	25.9836	20.8841	18.6232	51.2262	3.49513	56.806	22.7816	21.1944	16.0508	36.916	22.7952	70.847	5.82503	41.1759	9.04452	50.0957	10.1502	32.6729	17.0246	61.3081	18.1989	59.7012	27.3915	32.5728	16.1574	15.3938	32.4794	51.255
ENSG00000170234	352.541	0.446399	7.57719e-05	5	160061801	160119423	PWWP domain containing 2A [Source:HGNC Symbol;Acc:HGNC:29406]	PWWP2A	protein_coding	370.267	511.301	269.664	476.314	193.63	393.381	249.513	316.22	274.469	341.473	251.659	344.731	224.846	443.36	363.425	467.56	303.056	529.573	323.467	412.928	304.028	347.914	404.025	396.127	368.158	400.239	272.827	317.001
ENSG00000073803	101.563	-0.623987	7.57719e-05	3	185282941	185489097	mitogen-activated protein kinase kinase kinase 13 [Source:HGNC Symbol;Acc:HGNC:6852]	MAP3K13	protein_coding	67.395	69.1337	189.212	89.8705	224.387	97.2802	69.4296	82.2342	105.935	55.374	138.595	94.1747	113.006	65.1154	126.623	73.9507	107.302	57.1775	117.28	93.7653	122.039	69.9945	113.675	109.277	72.7083	55.9775	192.092	70.7542
ENSG00000125637	1376.24	0.477092	7.58154e-05	2	113157325	113209396	pleckstrin and Sec7 domain containing 4 [Source:HGNC Symbol;Acc:HGNC:19096]	PSD4	protein_coding	996.309	1117.66	608.606	880.731	471.143	1168.78	1182.47	1286.92	1352.28	1763.45	1186.26	2622.2	1273.35	2281.91	1240.74	1712.79	1036.77	1308.28	1125.51	1426.31	1057.67	1572.82	1522.97	1488.89	1547.65	2040.38	1443.94	1817.88
ENSG00000166747	1810.36	-0.371328	7.58154e-05	16	71729000	71809201	adaptor related protein complex 1 gamma 1 subunit [Source:HGNC Symbol;Acc:HGNC:555]	AP1G1	protein_coding	2516.35	1806.84	2080.58	1778.54	2491.33	1900.16	1151.01	1331.86	1328.21	1201.9	2319.64	2295.62	2528.06	1826.1	2937.83	1754.54	2438.95	1791.56	1770.56	1273.04	1959.05	1332.98	1880.43	1152.66	1781.93	1259.49	1567.36	1233.46
ENSG00000091106	5515.58	-0.562865	7.65095e-05	2	32224453	32265854	NLR family CARD domain containing 4 [Source:HGNC Symbol;Acc:HGNC:16412]	NLRC4	protein_coding	7068.36	3033.96	6989.66	6754.67	7464.9	6811.74	3511.62	2987.56	3259.92	1681.81	6896	6463.49	7549.24	4569.57	5339.56	5432.99	6030.67	2967.79	9683.2	7402.05	6020.61	4824.48	6467.14	2558.54	4685.65	2948.61	10424.9	4607.38
ENSG00000176749	109.873	0.867265	7.66459e-05	17	32486619	32491256	cyclin dependent kinase 5 regulatory subunit 1 [Source:HGNC Symbol;Acc:HGNC:1775]	CDK5R1	protein_coding	77.1389	195.159	25.3275	121.325	104.155	150.536	35.7996	171.251	44.9423	66.7327	20.9716	76.0309	131.646	257.589	150.468	159.829	63.8013	221.903	111.606	135.238	33.1861	108.08	135.588	87.2111	76.1706	86.7651	77.0225	150.98
ENSG00000154889	878.663	0.578213	7.66459e-05	18	11882622	11909223	metallophosphoesterase 1 [Source:HGNC Symbol;Acc:HGNC:15988]	MPPE1	protein_coding	924.042	956.35	616.055	1018.23	374.678	1296.6	450.208	818.951	688.58	1012.35	567.145	1061.84	598.813	1309.97	901.163	1031.73	595.962	1125.85	726.382	943.063	456.042	683.476	777.919	1036.03	1000.6	1115.35	1294.53	1220.65
ENSG00000186591	7467.77	-0.820145	7.67964e-05	7	129830732	129952949	ubiquitin conjugating enzyme E2 H [Source:HGNC Symbol;Acc:HGNC:12484]	UBE2H	protein_coding	8343.99	3281.69	10305.3	5541.42	17595.9	5623.08	7829.27	24968.7	3471.79	1536.98	9211.09	4448.67	11595.3	3438.67	8063.6	6557.76	6855.74	2778.56	16027.7	9827.33	6665.06	2820.37	7831.23	3555.69	4198.62	3761.69	9678.85	3283.67
ENSG00000116191	753.354	-0.453243	7.69629e-05	1	178725147	178921841	Ral GEF with PH domain and SH3 binding motif 2 [Source:HGNC Symbol;Acc:HGNC:30279]	RALGPS2	protein_coding	740.533	579.715	842.513	680.32	1080.69	568.77	501.195	564.619	644.44	433.053	950.104	719.702	535.903	508.475	1497.28	1414.61	1593.58	789.594	713.14	485.055	726.884	408.645	1016.23	588.412	734.008	590.563	686.707	499.18
ENSG00000100902	169.977	-0.49312	7.71408e-05	14	35278633	35317493	proteasome subunit alpha 6 [Source:HGNC Symbol;Acc:HGNC:9535]	PSMA6	protein_coding	202.997	126.745	248.061	144.692	274.717	175.388	164.895	137.34	138.037	99.3892	196.951	94.1747	308.726	155.128	169.379	103.77	147.903	115.716	155.113	196.547	308.31	207.925	121.892	113.479	155.804	138.544	207.868	149.865
ENSG00000236090	8.20247	-1.09385	7.7984e-05	2	41819747	41820754	lactate dehydrogenase A pseudogene 3 [Source:HGNC Symbol;Acc:HGNC:6538]	LDHAP3	processed_pseudogene	17.0517	5.76114	13.4087	7.18964	16.7766	6.39067	6.50903	5.08665	16.8534	3.54961	15.5007	9.50387	5.82503	0.95758	13.9779	4.77102	4.35009	0	1.89162	0	17.1283	6.17599	15.0653	6.30442	8.0787	5.59775	12.0638	3.89984
ENSG00000026508	5077.3	-0.661597	8.17599e-05	11	35138870	35232402	CD44 molecule (Indian blood group) [Source:HGNC Symbol;Acc:HGNC:1681]	CD44	protein_coding	6735.44	4069.53	6190.35	4048.67	10453.2	3879.85	4265.58	3664.93	4659.55	3504.18	7759.49	13669.2	9812.84	5848.9	5807.41	3396.96	9668.79	3211.47	4855.79	1839.24	3898.84	2202.77	4193.64	2034.22	4020.89	2285.28	3197.83	2989.51
ENSG00000140299	7722.72	-0.453655	8.20468e-05	15	59659146	59689534	BCL2 interacting protein 2 [Source:HGNC Symbol;Acc:HGNC:1083]	BNIP2	protein_coding	10305.8	6136.34	9681.82	8067.68	10093.2	7961.36	3957.49	4587.31	5711.68	3046.99	7631.83	5770.58	8292.51	7534.24	10155.4	8368.36	11975.8	5698.69	9467.55	8291.02	11139.8	7921.74	8629.7	6311.77	7532.81	5415.82	10973.4	5575.66
ENSG00000138757	2182.43	-0.299191	8.40698e-05	4	75642782	75724525	G3BP stress granule assembly factor 2 [Source:HGNC Symbol;Acc:HGNC:30291]	G3BP2	protein_coding	2321.47	2260.53	2547.65	2264.74	2409.54	2030.81	2278.16	2036.36	1872.33	1370.15	2368.88	1499.88	2291.57	1794.5	2899.18	2217.33	2154.74	1720.77	2275.62	1882.52	2527.5	2132.77	2441.95	2316.87	2567.87	2213.91	2688.36	1722.06
ENSG00000272918	15.1048	1.06143	8.48226e-05	7	105102838	105105483		CTB-152G17.6	antisense	17.8637	23.0446	5.95942	17.9741	2.09708	16.3317	5.42419	13.5644	8.82795	34.0763	17.3244	30.2396	3.49502	38.3032	12.3334	22.6623	18.8504	29.9501	5.67486	14.4254	4.28208	5.14666	4.10873	18.9132	16.1574	13.9944	4.63991	17.2707
ENSG00000091262	14.4931	1.18276	8.48998e-05	16	16148928	16223522	ATP binding cassette subfamily C member 6 [Source:HGNC Symbol;Acc:HGNC:57]	ABCC6	protein_coding	12.9918	30.246	1.48986	31.4547	5.59221	12.0713	9.76354	24.5855	17.6559	26.9771	1.82362	12.0958	4.66002	50.7517	15.6224	16.6986	4.35009	23.1433	5.67486	1.80318	2.14104	19.5573	13.6958	14.7103	3.4623	16.7932	6.49587	19.4992
ENSG00000116990	57.3101	0.819057	8.48998e-05	1	39895426	39902256	v-myc avian myelocytomatosis viral oncogene lung carcinoma derived homolog [Source:HGNC Symbol;Acc:HGNC:7555]	MYCL	protein_coding	34.1035	73.4546	15.6435	25.1637	29.3591	53.2556	85.7022	98.342	179.769	144.114	5.47085	17.2798	30.2901	76.6064	41.1115	67.987	33.3507	54.4548	18.9162	36.0636	27.8335	76.1705	21.9132	78.8052	75.0165	89.564	18.5596	96.3818
ENSG00000072415	109.891	-0.425207	8.5829e-05	14	67241109	67335819	membrane palmitoylated protein 5 [Source:HGNC Symbol;Acc:HGNC:18669]	MPP5	protein_coding	155.902	98.6596	131.107	89.8705	135.611	92.3097	123.671	107.668	92.2922	63.1831	135.859	101.087	97.8605	68.9458	161.157	103.77	116.002	83.0436	157.004	133.435	135.956	84.4052	143.805	153.407	85.4034	67.173	88.1583	70.1971
ENSG00000106868	894.585	-0.458629	8.5829e-05	9	112040785	112175408	sushi domain containing 1 [Source:HGNC Symbol;Acc:HGNC:25413]	SUSD1	protein_coding	1152.21	842.567	2118.57	839.391	810.171	739.188	833.155	544.272	680.555	524.633	1076.85	748.214	1049.67	500.814	801.674	696.568	967.169	739.224	669.633	533.741	1352.07	1105.5	1055.94	892.075	1084.85	1043.98	991.085	654.616
ENSG00000249437	3084.17	-0.551118	8.70244e-05	5	70968483	71025114	NLR family apoptosis inhibitory protein [Source:HGNC Symbol;Acc:HGNC:7634]	NAIP	protein_coding	4097.29	1715.38	6556.11	5374.26	2287.21	3274.15	1390.76	799.452	2353.05	1597.33	4838.97	3728.97	4241.79	3631.14	4240.24	3297.96	2233.04	1143.55	3478.69	2735.42	3181.59	2286.15	2665.19	1270.34	3989.72	2523.19	5206.91	2219.01
ENSG00000088726	117.321	-0.761166	8.70244e-05	3	12733525	12769457	transmembrane protein 40 [Source:HGNC Symbol;Acc:HGNC:25620]	TMEM40	protein_coding	135.602	143.308	76.7275	37.7456	111.145	39.7642	206.119	68.6698	5.61779	2.83969	109.417	40.6074	237.661	107.249	198.98	90.6493	113.102	68.0685	158.896	39.6699	312.592	165.722	146.545	150.255	124.643	145.541	128.061	119.781
ENSG00000127831	64.1462	-0.76996	8.80789e-05	2	218419092	218453295	villin 1 [Source:HGNC Symbol;Acc:HGNC:12690]	VIL1	protein_coding	189.193	63.3726	61.829	39.543	71.9996	20.5922	47.7329	39.8455	2.40762	1.41985	31.0015	13.8238	80.3854	49.7942	57.5561	54.8667	88.4518	63.9844	45.3988	10.8191	222.668	65.8772	83.5441	79.8559	116.564	79.7679	65.8867	47.9123
ENSG00000182923	643.932	0.627555	8.81184e-05	3	134485743	134575017	centrosomal protein 63 [Source:HGNC Symbol;Acc:HGNC:25815]	CEP63	protein_coding	535.1	789.276	697.997	1101.81	222.29	709.364	775.659	737.565	382.009	788.014	341.016	897.683	427.557	993.01	929.119	838.506	281.306	601.725	514.52	580.624	426.067	664.948	465.656	734.464	650.913	925.028	511.318	507.536
ENSG00000108861	717.408	-0.499003	8.84581e-05	17	43766121	43778988	dual specificity phosphatase 3 [Source:HGNC Symbol;Acc:HGNC:3069]	DUSP3	protein_coding	693.438	600.599	1168.79	530.236	1016.38	606.404	748.538	451.017	832.235	647.45	1207.23	569.368	572.018	583.166	631.472	524.812	967.169	412.495	529.653	463.417	1265.36	891.401	593.026	481.237	931.359	762.693	747.953	658.516
ENSG00000231123	30.0752	-1.02661	8.84581e-05	21	38238227	38238664	spermatogenesis associated 20 pseudogene 1 [Source:HGNC Symbol;Acc:HGNC:39636]	SPATA20P1	processed_pseudogene	46.2833	6.48128	34.2667	26.9612	43.3396	32.6634	10.8484	10.1733	47.3499	16.3282	58.3557	49.2473	48.9302	5.74548	23.8447	10.7348	65.2513	13.6137	22.6994	18.0318	115.616	18.528	13.6958	6.30442	13.8492	15.3938	49.183	18.385
ENSG00000115129	291.688	-0.635277	8.87277e-05	2	24077433	24085861	tumor protein p53 inducible protein 3 [Source:HGNC Symbol;Acc:HGNC:19373]	TP53I3	protein_coding	595.999	239.808	457.386	326.23	336.231	326.634	114.993	105.972	347.5	121.397	329.163	305.852	549.883	209.71	120.868	90.6493	319.006	141.582	139.98	155.073	431.42	256.304	387.59	184.93	169.653	153.938	799.92	449.596
ENSG00000116260	1282.71	-0.627166	8.96565e-05	1	180154834	180204030	quiescin sulfhydryl oxidase 1 [Source:HGNC Symbol;Acc:HGNC:9756]	QSOX1	protein_coding	1368.2	1371.87	2415.06	1120.69	1482.63	715.755	866.785	1443.76	1218.26	657.389	3124.77	2127.14	2512.92	846.501	1270.34	815.844	893.218	586.75	1269.28	941.259	1939.78	1241.37	1487.36	575.803	851.726	621.35	1312.17	837.908
ENSG00000109272	127.882	-0.865227	8.96565e-05	4	73853189	73854155	platelet factor 4 variant 1 [Source:HGNC Symbol;Acc:HGNC:8862]	PF4V1	protein_coding	40.5994	25.9251	252.53	195.918	278.212	44.7347	291.821	165.316	13.6432	17.7481	196.951	62.2071	447.362	194.389	219.535	125.239	42.0508	34.0342	206.186	45.0795	87.7827	18.528	91.7616	58.8412	188.118	190.323	24.1275	21.7277
ENSG00000238201	46.5007	-0.794217	9.04653e-05	2	64338067	64341647		AC114752.3	lincRNA	79.5748	42.4884	22.3478	21.5689	65.7084	17.0418	21.6968	20.3466	2.40762	3.54961	36.4723	9.50387	83.8804	38.3032	24.6669	16.6986	53.6511	38.1184	77.5564	21.6381	107.052	42.2026	113.675	79.8559	98.0985	90.9634	50.111	22.8419
ENSG00000258819	46.659	1.06233	9.05473e-05	14	77069180	77076344		RP11-7F17.3	lincRNA	36.5395	112.342	61.0841	151.881	81.786	68.1672	15.1877	60.1921	1.60508	20.5878	51.0613	62.2071	6.99003	37.3456	67.4228	64.4087	18.8504	115.716	11.3497	55.8985	2.14104	39.1146	17.8045	19.964	8.0787	16.7932	36.1913	65.7402
ENSG00000132581	823.787	-0.343284	9.05473e-05	17	28648356	28662189	stromal cell derived factor 2 [Source:HGNC Symbol;Acc:HGNC:10675]	SDF2	protein_coding	853.399	567.472	1138.99	857.365	1248.46	817.296	508.789	440.843	629.995	471.389	843.422	630.711	843.464	719.143	685.739	685.834	955.569	650.735	894.736	840.281	1118.69	965.513	1057.31	830.081	849.418	832.665	1324.23	804.481
ENSG00000154330	107.52	1.08888	9.12793e-05	9	68328308	68531061	phosphoglucomutase 5 [Source:HGNC Symbol;Acc:HGNC:8908]	PGM5	protein_coding	30.8555	76.3351	17.8783	94.364	7.68928	61.7765	18.4422	27.1288	763.216	1072.69	10.0299	235.869	1.16501	10.5334	7.40006	20.2768	31.9006	19.0592	51.0737	68.5208	9.63469	63.8186	69.8484	140.799	17.3115	27.9887	20.4156	34.5414
ENSG00000183578	80.839	-1.3019	9.19803e-05	15	51056598	51105276	TNF alpha induced protein 8 like 3 [Source:HGNC Symbol;Acc:HGNC:20620]	TNFAIP8L3	protein_coding	62.5231	20.8841	32.7768	51.2262	167.067	27.6929	19.5271	9.32553	230.329	5.67938	58.3557	94.1747	297.076	27.7698	80.5785	40.5536	268.255	5.44548	96.4726	30.654	226.95	56.6132	35.609	15.761	35.7771	11.1955	216.22	38.9984
ENSG00000129473	75.8723	-0.500597	9.19874e-05	14	23298790	23311759	BCL2 like 2 [Source:HGNC Symbol;Acc:HGNC:995]	BCL2L2	protein_coding	72.2669	56.1711	75.9826	45.834	59.4172	55.3858	114.993	63.5832	78.649	66.7327	82.0627	68.255	103.686	62.2427	101.956	50.0957	50.751	53.0934	62.4234	36.0636	131.674	87.4932	93.1311	61.9934	126.951	95.1617	102.078	66.2973
ENSG00000180549	802.748	-0.545172	9.45347e-05	9	137030174	137033010	fucosyltransferase 7 [Source:HGNC Symbol;Acc:HGNC:4018]	FUT7	protein_coding	829.04	573.234	842.513	613.816	1825.86	891.854	584.727	584.117	677.344	303.137	520.642	780.181	1640.33	829.264	817.296	494.993	939.619	431.554	996.883	708.649	966.68	698.916	914.877	613.63	893.274	699.719	1081.1	723.699
ENSG00000125735	878.515	0.574469	9.70769e-05	19	6661253	6670588	tumor necrosis factor superfamily member 14 [Source:HGNC Symbol;Acc:HGNC:11930]	TNFSF14	protein_coding	837.972	1149.35	633.188	1241.11	469.046	865.581	414.408	603.616	603.511	755.358	277.19	991.858	701.333	1620.23	708.762	1034.12	1046.92	1468.92	645.042	759.138	594.139	1025.21	916.246	1001.35	1187.57	1420.43	854.671	772.168
ENSG00000253738	250.078	-0.428829	9.72504e-05	8	91059909	91070189	OTUD6B antisense RNA 1 (head to head) [Source:HGNC Symbol;Acc:HGNC:50466]	OTUD6B-AS1	antisense	311.803	198.039	385.128	227.372	253.047	247.816	248.428	189.902	247.183	160.443	234.335	181.437	322.707	249.928	282.847	326.815	369.757	200.121	228.886	200.153	377.894	235.717	271.176	202.792	219.279	172.131	276.539	180.507
ENSG00000134668	79.4342	-0.820266	9.87369e-05	1	31790422	31816051	SPOC domain containing 1 [Source:HGNC Symbol;Acc:HGNC:26338]	SPOCD1	protein_coding	63.3351	14.4029	46.9304	16.1767	24.4659	16.3317	218.052	67.8221	8.02541	3.54961	119.447	47.5193	223.681	73.7337	228.58	87.071	29.0006	27.2274	69.9899	25.2445	114.546	97.7865	86.2833	80.9067	109.64	125.949	102.078	96.3818
ENSG00000140022	465.644	-0.743295	9.93321e-05	14	81260656	81436465	stonin 2 [Source:HGNC Symbol;Acc:HGNC:30652]	STON2	protein_coding	508.304	502.66	309.89	317.243	602.56	141.305	888.482	334.871	41.7321	28.3969	331.898	177.118	750.264	285.359	772.073	231.394	553.911	407.05	855.012	286.705	1162.59	650.538	520.439	378.265	473.181	496.8	519.67	510.322
ENSG00000185112	35.4792	0.858553	9.95263e-05	3	194686544	194689037	family with sequence similarity 43 member A [Source:HGNC Symbol;Acc:HGNC:26888]	FAM43A	protein_coding	23.5477	46.8093	29.0522	56.6184	11.1844	46.8649	26.0361	47.4754	55.3753	62.4732	14.5889	94.1747	16.3101	36.388	12.3334	23.8551	42.0508	36.757	9.45809	27.0477	16.0578	31.9093	32.8698	52.5368	36.9312	36.3854	20.4156	47.9123
ENSG00000225938	8.98992	-1.34189	0.000100217	1	101235683	101236528		RP4-575N6.4	antisense	8.11988	2.88057	28.3073	1.79741	46.1357	2.13022	5.42419	2.54333	3.21016	5.67938	22.7952	0.863988	43.1052	0.95758	9.04452	2.38551	21.7504	2.72274	5.67486	3.60636	13.9168	5.14666	0	2.10147	2.3082	2.79887	4.63991	1.67136
ENSG00000177359	14.1313	-1.16418	0.00010255	12	31111652	31206154		OVOS2	protein_coding	9.74386	5.76114	0	0	0.699026	0.710075	55.3267	11.8689	0.802541	0	41.9432	6.04792	50.0952	9.5758	3.28892	0	75.4015	21.7819	5.67486	1.80318	18.1989	4.11733	23.2828	9.45662	2.3082	1.39944	15.7757	20.6134
ENSG00000243646	1631.58	-0.412479	0.000102836	21	33266358	33310187	interleukin 10 receptor subunit beta [Source:HGNC Symbol;Acc:HGNC:5965]	IL10RB	protein_coding	1893.56	1445.33	2084.31	1627.55	1832.85	1697.79	1162.95	953.748	1312.15	821.381	1869.21	2108.13	2265.94	1379.87	1832.75	1289.37	1831.39	1169.42	1821.63	1433.53	1689.28	1630.46	1753.06	1289.25	2021.98	1431.62	2729.19	1306.45
ENSG00000068724	314.004	0.59321	0.000103429	2	46916157	47076137	tetratricopeptide repeat domain 7A [Source:HGNC Symbol;Acc:HGNC:19750]	TTC7A	protein_coding	213.553	485.376	432.058	596.74	469.046	482.851	261.446	436.604	454.238	466.419	193.303	400.89	191.061	255.674	95.3786	248.093	233.455	498.261	124.847	234.413	119.898	294.389	167.088	167.067	320.84	383.446	279.323	286.36
ENSG00000140479	437.117	-0.709264	0.000103699	15	101297142	101525202	proprotein convertase subtilisin/kexin type 6 [Source:HGNC Symbol;Acc:HGNC:8569]	PCSK6	protein_coding	497.749	565.312	324.788	223.778	437.59	144.145	665.005	383.195	42.5347	22.0076	567.145	191.805	851.619	481.663	626.539	301.767	363.957	351.233	448.314	90.1589	534.19	387.029	850.506	433.954	685.536	645.141	593.908	528.707
ENSG00000198176	2069.17	-0.709432	0.000104517	13	113584721	113641470	transcription factor Dp-1 [Source:HGNC Symbol;Acc:HGNC:11749]	TFDP1	protein_coding	2052.71	828.164	1698.44	1607.78	6360.44	1910.81	3756.79	6396.47	891.623	628.992	2422.67	948.659	1760.32	751.7	1804.79	1161.74	1869.09	609.894	5495.15	2841.81	2407.6	1097.27	1853.04	1355.45	1483.02	1430.22	1462.5	1049.61
ENSG00000120948	383.718	-0.394085	0.000105077	1	11012344	11026420	TAR DNA binding protein [Source:HGNC Symbol;Acc:HGNC:11571]	TARDBP	protein_coding	353.215	332.706	554.226	335.217	550.133	389.121	378.608	390.825	418.124	322.305	486.906	347.323	475.322	230.777	516.36	412.693	445.159	319.922	302.659	292.115	467.818	362.325	362.938	247.974	391.24	313.474	417.592	327.029
ENSG00000109103	689.357	0.506506	0.000105133	17	28546707	28552668	unc-119 lipid binding chaperone [Source:HGNC Symbol;Acc:HGNC:12565]	UNC119	protein_coding	535.1	684.856	560.931	883.427	301.979	760.49	474.074	511.209	653.268	726.961	579.91	789.685	343.677	773.725	536.094	574.907	417.608	690.214	363.191	613.081	377.894	667.007	710.81	1082.26	1159.87	1456.81	1077.39	995.573
ENSG00000214688	12.6808	1.18055	0.000108804	10	71711701	71737824	chromosome 10 open reading frame 105 [Source:HGNC Symbol;Acc:HGNC:20304]	C10orf105	protein_coding	2.43596	17.2834	8.93913	13.4806	2.09708	22.0123	7.59386	5.93443	8.82795	27.687	9.11808	57.8872	3.49502	22.0243	5.75561	13.1203	5.80012	43.5638	1.89162	5.40954	0	5.14666	5.4783	9.45662	19.6197	18.1927	5.56789	7.24256
ENSG00000167077	107.908	-0.659506	0.000109307	22	41699499	41799456	meiotic double-stranded break formation protein 1 [Source:HGNC Symbol;Acc:HGNC:28613]	MEI1	protein_coding	82.8228	40.328	108.015	90.7692	89.4753	128.523	121.502	93.2553	96.3049	51.1144	250.747	146.878	320.377	131.188	83.8674	46.5174	89.9018	35.3956	60.5318	36.0636	77.0775	62.7892	84.9137	83.0081	195.043	76.9691	233.851	104.181
ENSG00000108091	144.907	0.628487	0.000112089	10	59788763	59906656	coiled-coil domain containing 6 [Source:HGNC Symbol;Acc:HGNC:18782]	CCDC6	protein_coding	112.866	259.972	84.9218	159.071	119.533	125.683	161.641	177.185	123.591	153.343	100.299	227.229	66.4053	163.746	87.9785	159.829	89.9018	175.617	221.319	384.077	79.2185	96.7572	119.153	101.921	109.64	110.556	77.0225	208.92
ENSG00000188906	24990.8	0.609396	0.000112695	12	40196744	40369285	leucine rich repeat kinase 2 [Source:HGNC Symbol;Acc:HGNC:18618]	LRRK2	protein_coding	29213.7	34010.2	9970.86	25032.5	10825.8	22569.7	15134.6	15350.7	12477.1	19466.1	12551	17289.3	13570	43788.2	33576.6	43811	13204	28746.7	19177.2	27851.9	18538.2	47138.2	30012.9	31427.5	29982.4	34094.5	30139.9	30791.5
ENSG00000197170	562.511	-0.475455	0.000112748	17	67337916	67366627	proteasome 26S subunit, non-ATPase 12 [Source:HGNC Symbol;Acc:HGNC:9557]	PSMD12	protein_coding	679.634	589.797	1115.9	730.647	887.064	622.025	406.814	493.405	495.97	322.305	634.618	495.065	646.578	276.741	696.428	588.028	700.364	564.968	533.436	438.172	697.979	459.082	531.395	389.823	535.503	359.655	594.836	264.075
ENSG00000134548	121.936	-0.899414	0.000112748	12	21526307	21537377	spexin hormone [Source:HGNC Symbol;Acc:HGNC:28139]	SPX	protein_coding	301.248	352.15	134.087	102.452	281.707	35.5037	218.052	63.5832	14.4457	4.25954	98.4753	15.5518	156.111	84.267	203.091	73.9507	223.304	104.825	51.0737	18.0318	108.123	49.4079	109.566	97.7184	123.489	120.352	151.261	118.109
ENSG00000169087	433.872	0.533648	0.000114576	3	122740003	122793824	HSPB1 associated protein 1 [Source:HGNC Symbol;Acc:HGNC:16389]	HSPBAP1	protein_coding	642.282	701.419	277.858	498.781	197.824	404.032	352.572	456.103	247.985	284.679	286.308	470.873	251.641	633.918	475.249	505.728	240.705	404.327	423.723	598.655	218.386	559.956	471.134	494.897	439.712	505.197	495.542	608.932
ENSG00000213889	96.8567	-0.862239	0.000115741	19	45488777	45502510	protein phosphatase, Mg2+/Mn2+ dependent 1N (putative) [Source:HGNC Symbol;Acc:HGNC:26845]	PPM1N	protein_coding	87.6947	72.7344	118.443	76.3899	58.7182	74.5578	172.489	36.4544	99.5151	26.9771	85.71	55.2952	161.936	177.152	69.0673	22.6623	88.4518	17.6978	58.6402	21.6381	157.367	148.224	39.7177	27.3191	259.673	88.1646	309.018	100.282
ENSG00000142102	580.852	0.731717	0.000117256	11	289135	296107	protein-glucosylgalactosylhydroxylysine glucosidase [Source:HGNC Symbol;Acc:HGNC:26210]	PGGHG	protein_coding	369.455	629.405	225.713	254.334	260.038	399.772	487.092	326.394	312.991	1194.09	600.882	693.782	548.718	1960.17	500.738	654.822	711.964	986.993	181.595	452.598	93.1353	361.295	453.33	728.16	631.293	955.816	460.279	828.995
ENSG00000143772	364.577	0.488682	0.000117256	1	226631690	226739323	inositol-trisphosphate 3-kinase B [Source:HGNC Symbol;Acc:HGNC:6179]	ITPKB	protein_coding	254.152	547.308	484.203	518.553	200.62	280.479	352.572	439.148	281.692	479.908	384.783	809.557	375.132	545.821	348.625	423.428	229.105	443.807	274.285	230.807	183.059	250.128	239.676	249.024	350.846	461.814	218.076	351.543
ENSG00000177613	420.058	-0.385034	0.000117256	10	51695487	51699591	cleavage stimulation factor subunit 2 tau variant [Source:HGNC Symbol;Acc:HGNC:17086]	CSTF2T	protein_coding	412.49	342.788	423.119	438.568	656.385	427.465	329.791	345.045	503.193	406.076	408.49	341.275	598.813	325.577	545.96	403.151	407.458	304.947	595.86	447.188	471.029	301.594	342.394	292.105	472.027	349.859	536.373	332.601
ENSG00000116138	381.64	-0.418811	0.000117256	1	15526813	15592379	DnaJ heat shock protein family (Hsp40) member C16 [Source:HGNC Symbol;Acc:HGNC:29157]	DNAJC16	protein_coding	548.904	339.187	416.415	381.95	398.445	318.823	263.616	284.005	343.487	266.931	408.49	282.524	504.447	240.353	446.471	328.007	435.009	362.124	433.181	308.344	704.403	415.85	490.308	354.098	368.158	369.451	399.96	272.989
ENSG00000164430	657.779	-0.506503	0.000118123	6	73413515	73452276	Mab-21 domain containing 1 [Source:HGNC Symbol;Acc:HGNC:21367]	MB21D1	protein_coding	738.909	512.021	1010.12	605.727	1237.28	557.408	318.942	318.764	301.755	234.275	662.884	417.306	848.124	744.997	758.095	715.652	1380.43	549.993	554.244	582.427	1180.78	652.596	675.201	498.049	532.04	446.421	863.023	520.35
ENSG00000166002	161.808	0.630318	0.000119746	11	93478472	93543508	single-pass membrane protein with coiled-coil domains 4 [Source:HGNC Symbol;Acc:HGNC:24810]	SMCO4	protein_coding	52.7792	113.783	148.986	266.915	118.834	198.111	120.417	93.2553	191.807	247.763	100.299	233.277	76.8904	179.067	66.6006	144.323	62.3513	66.7071	47.2905	91.9621	104.911	225.424	104.088	206.995	311.607	407.236	301.594	247.361
ENSG00000196850	598.676	0.574353	0.000119746	12	110533245	110583320	PTC7 protein phosphatase homolog [Source:HGNC Symbol;Acc:HGNC:30695]	PPTC7	protein_coding	419.798	883.615	699.487	1024.52	299.183	673.151	535.91	550.206	446.213	724.831	373.841	898.547	287.756	713.397	647.917	961.36	543.761	880.806	378.324	405.715	298.675	587.748	487.569	460.222	746.703	772.489	528.022	533.164
ENSG00000104756	255.438	-0.616011	0.000121255	8	25427847	25458476	potassium channel tetramerization domain containing 9 [Source:HGNC Symbol;Acc:HGNC:22401]	KCTD9	protein_coding	311.803	180.036	425.354	264.219	452.969	206.632	304.839	455.256	143.655	131.336	356.517	201.309	474.157	137.892	374.114	251.671	266.805	171.533	317.792	245.232	339.355	145.136	210.915	145.002	148.879	116.153	225.5	148.194
ENSG00000111912	740.498	-0.38497	0.000121366	6	125781161	125932030	nuclear receptor coactivator 7 [Source:HGNC Symbol;Acc:HGNC:21081]	NCOA7	protein_coding	915.11	559.551	662.241	539.223	822.753	588.652	666.09	799.452	742.35	440.152	514.26	488.153	616.288	500.814	1005.59	834.928	598.862	458.782	860.687	699.633	2115.35	1239.32	843.659	647.253	648.604	470.211	862.095	593.89
ENSG00000148498	196.974	-0.688315	0.000121383	10	34109560	34815325	par-3 family cell polarity regulator [Source:HGNC Symbol;Acc:HGNC:16051]	PARD3	protein_coding	290.692	236.207	128.872	131.211	299.882	77.3981	250.597	88.1687	21.6686	20.5878	95.7398	34.5595	260.961	181.94	253.247	122.854	253.755	125.246	223.211	82.9462	457.112	296.447	327.329	250.075	306.991	256.097	218.076	223.405
ENSG00000178814	646.068	-0.693226	0.0001214	8	144051266	144063965	5-oxoprolinase (ATP-hydrolysing) [Source:HGNC Symbol;Acc:HGNC:8149]	OPLAH	protein_coding	647.966	271.494	672.67	369.368	417.318	551.728	565.2	615.485	383.615	117.137	1002.08	1082.58	1875.66	594.657	828.807	453.247	529.261	189.23	896.627	622.097	621.973	525.988	624.526	303.663	737.47	366.653	1340.93	882.478
ENSG00000198961	7228.94	-0.40494	0.000122237	5	109334709	109409994	praja ring finger ubiquitin ligase 2 [Source:HGNC Symbol;Acc:HGNC:17481]	PJA2	protein_coding	8058.98	5707.85	8300.73	6924.52	10544.1	7975.56	3995.46	5296.05	4681.22	3045.57	8000.2	5945.96	8752.69	7065.03	13269.1	10382.9	10402.5	6827.27	8427.16	7283.04	7624.25	5835.28	7992.84	4981.54	7015.78	5218.5	8579.19	4277.01
ENSG00000226891	28.3669	1.01326	0.000123083	1	64972225	65002489	long intergenic non-protein coding RNA 1359 [Source:HGNC Symbol;Acc:HGNC:50591]	LINC01359	processed_transcript	17.8637	32.4064	13.4087	28.7586	25.864	19.8821	29.2906	23.7377	12.0381	109.328	7.29446	30.2396	17.4751	58.4124	20.5557	17.8913	21.7504	91.2118	17.0246	43.2763	10.7052	18.528	9.58703	19.964	16.1574	40.5837	6.49587	34.5414
ENSG00000158669	838.764	-0.522218	0.000123083	8	41577187	41625001	glycerol-3-phosphate acyltransferase 4 [Source:HGNC Symbol;Acc:HGNC:20880]	GPAT4	protein_coding	971.95	673.333	1453.35	674.928	1030.36	722.146	572.794	660.417	609.129	436.603	1620.28	774.133	920.354	693.288	1003.94	733.544	878.718	654.819	1015.8	1045.84	688.345	646.42	834.072	443.411	863.267	626.948	1608.19	628.988
ENSG00000120725	319.884	-0.602725	0.000124035	5	138946720	139293557	SIL1 nucleotide exchange factor [Source:HGNC Symbol;Acc:HGNC:24624]	SIL1	protein_coding	506.68	199.48	335.217	284.89	278.212	340.836	215.883	216.183	461.461	171.091	458.639	393.115	315.717	178.11	315.736	248.093	216.054	112.994	427.506	333.588	495.651	299.535	450.59	189.132	278.138	207.117	700.626	326.472
ENSG00000138735	1286.39	-0.632258	0.000124035	4	119494395	119628991	phosphodiesterase 5A [Source:HGNC Symbol;Acc:HGNC:8784]	PDE5A	protein_coding	1403.12	1140.71	674.904	661.447	1369.39	552.438	1409.2	595.139	174.954	101.519	886.277	310.172	1568.1	1728.43	2275.93	1127.15	1748.74	976.102	1363.86	443.582	2997.46	1975.29	2621.37	2162.41	1616.89	1641.54	1353	1139.87
ENSG00000197965	976.016	1.07782	0.000124331	1	167721192	167791919	myelin protein zero like 1 [Source:HGNC Symbol;Acc:HGNC:7226]	MPZL1	protein_coding	881.007	1456.13	1689.5	3349.47	260.737	1537.31	397.051	790.127	633.205	920.77	644.648	2191.07	97.8605	1702.58	360.959	985.215	134.853	692.937	363.191	988.142	74.9364	578.484	1387.38	1226.21	480.106	1265.09	1194.31	1045.16
ENSG00000163803	1011.09	-0.755215	0.000124331	2	28457145	28643788	phospholipase B1 [Source:HGNC Symbol;Acc:HGNC:30041]	PLB1	protein_coding	1783.94	408.321	1473.47	1280.65	876.578	1327.13	433.935	473.907	873.967	630.411	1835.47	1756.49	2074.88	1038.02	1129.74	724.002	1421.03	570.414	688.549	382.274	876.756	430.261	1050.46	409.787	1240.66	363.854	2050.84	704.757
ENSG00000168264	903.837	0.515224	0.000125179	1	234604269	234609525	interferon regulatory factor 2 binding protein 2 [Source:HGNC Symbol;Acc:HGNC:21729]	IRF2BP2	protein_coding	557.024	990.916	463.345	964.311	535.454	1089.25	885.228	1832.04	1091.46	1167.11	571.704	1240.69	336.687	518.051	600.227	559.402	581.462	871.277	1282.52	1265.83	624.114	871.844	687.527	886.821	1191.03	1197.92	1059.76	1384.44
ENSG00000204614	11.5647	-1.26545	0.000125811	6	30136108	30148735	tripartite motif containing 40 [Source:HGNC Symbol;Acc:HGNC:18736]	TRIM40	protein_coding	12.1798	8.64171	5.95942	4.49353	38.4464	0	4.33935	4.23888	0.802541	0	4.55904	0.863988	61.7453	4.7879	20.5557	4.77102	14.5003	5.44548	13.2413	0	39.6093	8.23465	23.2828	8.40589	9.2328	8.39662	12.0638	5.01408
ENSG00000214293	51.6022	0.530571	0.000125818	7	77657660	77696265	Alu-mediated CDKN1A/p21 transcriptional regulator (non-protein coding) [Source:HGNC Symbol;Acc:HGNC:44173]	APTR	lincRNA	47.9073	79.9358	30.542	48.5301	34.9513	46.1548	21.6968	45.7799	31.2991	50.4045	41.9432	51.8393	73.3954	97.6732	55.9116	84.6855	49.301	72.1526	45.3988	57.7017	25.6925	46.3199	38.3481	65.1456	39.2394	55.9775	52.895	54.0406
ENSG00000280832	499.305	-0.706349	0.000125818	11	126340889	126355587	ST3GAL4 antisense RNA 1 (head to head) [Source:HGNC Symbol;Acc:HGNC:48645]	ST3GAL4-AS1	antisense	955.71	416.242	298.716	437.669	984.927	462.259	284.227	183.967	504.798	217.946	314.574	476.921	470.662	442.402	711.228	305.345	1061.42	336.258	618.559	232.61	587.716	434.378	601.244	378.265	605.903	327.468	914.062	415.054
ENSG00000171611	120.403	-0.799978	0.000125818	6	42915989	42925835	pre T-cell antigen receptor alpha [Source:HGNC Symbol;Acc:HGNC:21290]	PTCRA	protein_coding	112.054	108.021	59.5942	38.6443	88.0772	24.1425	237.579	62.7354	7.22287	5.67938	102.123	29.3756	255.136	152.255	191.579	56.0594	124.703	66.7071	179.704	50.489	325.438	180.133	158.871	194.386	128.105	131.547	166.109	134.823
ENSG00000178996	3561.21	-0.475548	0.00012736	5	54517759	54546585	sorting nexin 18 [Source:HGNC Symbol;Acc:HGNC:19245]	SNX18	protein_coding	4055.07	2529.86	3641.95	2880.35	6194.07	3987.78	2210.9	2779.86	3135.53	1622.17	4470.6	4345.86	2931.15	3095.86	6366.52	3220.44	4392.14	2758.14	4515.29	3169.99	4039.07	3226.95	3610.2	2333.68	4179	2822.67	4714.15	2484.76
ENSG00000114796	1359.14	0.397246	0.000129369	3	183635568	183684477	kelch like family member 24 [Source:HGNC Symbol;Acc:HGNC:25947]	KLHL24	protein_coding	1388.5	1842.85	1215.72	1844.14	965.355	1434.35	1004.56	1152.13	1056.14	981.113	1141.58	1549.99	736.284	1557.98	1842.62	1807.02	1117.97	1528.82	1409.26	1691.38	972.033	1625.31	1388.75	1829.33	1098.7	1449.82	1095.02	1329.29
ENSG00000134759	234.893	0.435016	0.000129751	18	36129444	36180556	elongator acetyltransferase complex subunit 2 [Source:HGNC Symbol;Acc:HGNC:18248]	ELP2	protein_coding	166.458	290.938	180.272	261.523	163.572	286.87	289.652	244.159	288.915	320.175	199.686	198.717	161.936	268.122	157.046	218.274	220.404	332.174	177.812	263.264	154.155	205.866	208.175	294.206	212.354	260.295	214.364	337.615
ENSG00000153975	277.956	-0.528401	0.000129751	6	116635618	116668794	zinc finger with UFM1 specific peptidase domain [Source:HGNC Symbol;Acc:HGNC:21224]	ZUFSP	protein_coding	328.855	180.036	396.302	230.967	464.153	230.064	261.446	216.183	254.405	154.053	267.16	139.966	369.307	220.243	282.025	244.515	319.006	140.221	281.851	301.131	537.401	302.623	391.699	326.779	208.892	257.496	257.051	218.948
ENSG00000164253	608.316	-0.436239	0.000132465	5	77425970	77620611	WD repeat domain 41 [Source:HGNC Symbol;Acc:HGNC:25601]	WDR41	protein_coding	809.552	450.089	664.475	372.963	610.948	591.492	262.531	243.312	761.611	373.419	643.737	432.858	871.424	632.003	541.849	527.197	636.563	430.193	541.003	589.64	1140.1	839.935	753.267	552.687	775.555	625.548	826.832	532.05
ENSG00000148411	575.288	0.565577	0.000133398	9	136006537	136095285	NACC family member 2 [Source:HGNC Symbol;Acc:HGNC:23846]	NACC2	protein_coding	605.743	1042.77	565.4	878.934	359.998	680.251	451.292	599.377	650.058	792.274	356.517	1196.62	454.352	571.675	479.36	706.11	379.908	510.514	327.25	385.88	230.162	654.655	423.199	422.396	529.732	640.942	561.429	651.273
ENSG00000233614	27.6431	-0.873137	0.000133691	16	11555	14090	DEAD/H-box helicase 11 like 10 [Source:HGNC Symbol;Acc:HGNC:14125]	DDX11L10	transcribed_unprocessed_pseudogene	33.2915	15.123	32.7768	18.8728	85.9802	19.8821	24.9513	16.9555	5.61779	4.96946	31.9133	19.8717	51.2602	13.4061	0.822229	0	58.0012	42.2025	3.78324	0	92.0648	29.8506	68.4788	30.4713	25.3902	15.3938	14.8477	17.8278
ENSG00000100219	1342.16	-0.690024	0.000133805	22	28794555	28800597	X-box binding protein 1 [Source:HGNC Symbol;Acc:HGNC:12801]	XBP1	protein_coding	919.17	730.225	3448.27	1035.31	2366.9	1147.48	1716.21	2867.18	1144.42	845.518	3756.65	999.634	1521.5	876.186	934.875	743.086	1550.08	628.953	1422.5	807.824	2250.23	1148.73	564.265	560.042	579.358	362.454	1612.83	1040.7
ENSG00000226012	15.3921	-1.11065	0.000134129	21	38237217	38238201		AP001434.2	lincRNA	29.2316	3.60071	24.5826	21.5689	14.6795	14.9116	2.16968	3.3911	23.2737	6.38931	24.6188	24.1917	27.9601	4.7879	18.089	4.77102	21.7504	9.52959	15.1329	5.40954	70.6544	11.3226	4.10873	1.05074	15.0033	5.59775	20.4156	2.7856
ENSG00000136021	2536.43	-0.29516	0.000135078	12	100267140	100341724	SCY1 like pseudokinase 2 [Source:HGNC Symbol;Acc:HGNC:19286]	SCYL2	protein_coding	3004.36	2172.67	2756.23	2344.72	3393.77	2331.17	2059.02	2051.62	1695.77	1364.47	2319.64	1667.5	2904.36	2733.89	3203.41	2674.15	2840.61	2039.33	3058.75	2286.43	3923.46	2896.54	3163.72	2859.05	2220.49	2313.27	2670.73	2070.82
ENSG00000116670	255.02	-0.433365	0.000135078	1	11674480	11691650	MAD2 mitotic arrest deficient-like 2 (yeast) [Source:HGNC Symbol;Acc:HGNC:6764]	MAD2L2	protein_coding	207.057	167.793	304.675	291.18	346.717	286.87	227.816	160.23	325.029	188.839	281.749	220.317	380.957	245.14	204.735	164.6	316.106	164.726	192.945	138.845	345.778	197.632	249.263	300.51	318.532	235.105	411.096	266.303
ENSG00000163220	440470	-0.550755	0.000135078	1	153357854	153361027	S100 calcium binding protein A9 [Source:HGNC Symbol;Acc:HGNC:10499]	S100A9	protein_coding	527303	275072	531414	370009	629798	458994	329176	265038	430925	155414	325624	364428	559351	331010	387730	314251	550592	184773	536597	502458	813033	692638	481299	347846	376642	293801	826717	471236
ENSG00000178607	372.129	0.487259	0.000135198	17	64039142	64130819	endoplasmic reticulum to nucleus signaling 1 [Source:HGNC Symbol;Acc:HGNC:3449]	ERN1	protein_coding	315.051	531.465	189.212	298.37	195.727	311.013	211.543	305.199	231.934	417.435	491.465	863.124	384.452	705.736	663.539	548.667	334.957	660.264	321.575	351.62	202.328	252.186	267.067	254.278	222.741	237.904	255.195	395.555
ENSG00000147862	24.6136	-1.01705	0.000135198	9	14081843	14398983	nuclear factor I B [Source:HGNC Symbol;Acc:HGNC:7785]	NFIB	protein_coding	10.5558	4.32086	11.1739	5.39223	47.5337	8.52089	31.4603	15.26	2.40762	6.38931	32.8251	25.0556	50.0952	20.1092	66.6006	10.7348	18.8504	4.08411	92.6893	18.0318	17.1283	8.23465	64.3701	15.761	28.8525	30.7876	21.3436	20.6134
ENSG00000279400	10.13	-1.21771	0.000136289	5	36667717	36669958		CTD-2353F22.2	TEC	11.3678	1.44029	8.1942	1.79741	21.6698	4.97052	0	0	6.42033	9.229	73.8565	7.77589	27.9601	9.5758	13.1557	7.15652	37.7008	2.72274	7.56647	3.60636	5.3526	3.08799	6.84788	3.15221	3.4623	0	2.78395	2.7856
ENSG00000078668	754.106	-0.403237	0.000136465	8	42391624	42405897	voltage dependent anion channel 3 [Source:HGNC Symbol;Acc:HGNC:12674]	VDAC3	protein_coding	931.35	707.9	1120.37	607.525	929.704	624.866	960.081	549.359	607.523	501.915	897.219	452.73	744.439	676.051	763.029	658.4	598.862	554.077	730.165	614.884	1136.89	769.94	894.333	798.559	820.565	782.285	935.406	746.541
ENSG00000250189	5.40355	1.32604	0.000137038	4	141405172	141407586		RP11-362F19.2	processed_pseudogene	0.811988	8.64171	0	0	1.39805	7.10075	3.25451	0.847776	9.63049	43.3053	4.55904	13.8238	0	5.74548	0	1.19275	4.35009	16.3364	0	5.40954	0	0	0	5.25368	1.1541	1.39944	0.927982	16.1565
ENSG00000120708	486.937	0.628443	0.000137038	5	136028895	136063818	transforming growth factor beta induced [Source:HGNC Symbol;Acc:HGNC:11771]	TGFBI	protein_coding	163.21	242.688	83.4319	159.071	444.58	738.477	480.583	462.038	1629.96	1625.01	207.892	438.042	366.977	494.111	327.247	610.69	262.455	443.807	83.2312	326.375	130.604	416.879	310.894	451.816	970.598	887.243	360.985	515.336
ENSG00000101213	13.4507	-1.05267	0.000137038	20	63528001	63537370	protein tyrosine kinase 6 [Source:HGNC Symbol;Acc:HGNC:9617]	PTK6	protein_coding	6.4959	2.88057	29.0522	10.7845	16.7766	10.6511	4.33935	4.23888	16.0508	4.96946	18.2362	23.3277	38.4452	4.7879	10.689	2.38551	31.9006	8.16822	17.0246	9.01589	16.0578	4.11733	9.58703	7.35515	18.4656	9.79606	34.3353	6.68544
ENSG00000170852	1894.54	-0.300687	0.000138176	7	32868172	32894131	kelch repeat and BTB domain containing 2 [Source:HGNC Symbol;Acc:HGNC:21751]	KBTBD2	protein_coding	1800.99	1527.42	2676.53	1996.92	2520.69	1755.3	1075.07	1207.23	1313.76	1177.76	2334.23	1568.14	2416.22	2047.31	2540.69	2013.37	3040.71	2025.72	2171.58	1853.67	1911.95	1563.55	1827.01	1608.68	1981.59	1707.31	1930.2	1453.53
ENSG00000118785	36.4281	-1.35612	0.000138439	4	87975650	87983426	secreted phosphoprotein 1 [Source:HGNC Symbol;Acc:HGNC:11255]	SPP1	protein_coding	2.43596	6.48128	18.6232	0	334.833	8.52089	9.76354	7.62998	4.0127	1.41985	88.4454	7.77589	37.2802	3.83032	121.69	8.34928	178.354	8.16822	51.0737	30.654	0	2.05866	5.4783	11.5581	12.6951	2.79887	45.4711	10.5853
ENSG00000172243	2152.83	0.71748	0.000138564	12	10116777	10130258	C-type lectin domain family 7 member A [Source:HGNC Symbol;Acc:HGNC:14558]	CLEC7A	protein_coding	1532.22	1780.91	1851.89	2417.52	1031.76	3059	1479.72	2475.5	1971.84	3382.78	1270.15	2155.65	732.789	3766.16	2600.71	2317.52	1257.18	3161.1	1087.68	2037.59	878.897	2590.83	1525.71	2497.6	3159.93	3760.29	2485.14	2011.2
ENSG00000233461	232.564	-0.550191	0.000138564	1	231522388	231528556		RP11-295G20.2	antisense	241.972	147.629	337.452	173.45	435.493	175.388	123.671	112.754	125.999	80.9312	227.952	159.838	297.076	245.14	156.224	124.046	501.71	176.978	206.186	219.988	389.67	318.063	198.588	161.813	256.21	230.907	445.431	241.233
ENSG00000162757	46.4027	-0.614896	0.000141844	1	209779208	209784559	chromosome 1 open reading frame 74 [Source:HGNC Symbol;Acc:HGNC:26319]	C1orf74	protein_coding	42.2234	29.5259	60.3391	32.3534	74.0967	42.6045	39.0542	32.2155	64.2033	40.4656	76.5919	36.2875	64.0753	26.8122	82.2229	50.0957	62.3513	21.7819	43.5072	52.2922	58.8786	41.1733	39.7177	33.6236	25.3902	26.5893	61.2468	39.5555
ENSG00000176974	52.4676	0.824628	0.000141846	17	18327860	18363563	serine hydroxymethyltransferase 1 [Source:HGNC Symbol;Acc:HGNC:10850]	SHMT1	protein_coding	18.6757	90.0178	45.4406	87.1744	51.0289	78.8183	66.1751	74.6043	85.8719	57.5038	33.7369	61.3431	15.1451	56.4972	12.3334	48.9029	15.9503	47.6479	45.3988	93.7653	21.4104	61.7599	36.9785	45.1816	55.3968	68.5724	32.4794	61.2832
ENSG00000134594	58.9796	-0.724804	0.000141846	X	130171649	130184870	RAB33A, member RAS oncogene family [Source:HGNC Symbol;Acc:HGNC:9773]	RAB33A	protein_coding	112.866	34.5669	33.5217	31.4547	37.0484	47.575	47.7329	42.3888	48.955	22.7175	127.653	42.3354	111.841	79.4791	74.8229	46.5174	50.751	17.6978	60.5318	50.489	84.5711	53.5252	84.9137	43.0802	45.0099	30.7876	137.341	51.255
ENSG00000213073	58.4223	0.752697	0.000142308	6	160093082	160096212		RP11-288H12.3	transcribed_processed_pseudogene	64.959	83.5366	32.7768	75.4912	47.5337	36.2138	34.7148	63.5832	30.4966	107.198	54.7085	112.318	52.4253	112.037	55.0894	59.6377	76.8515	157.919	56.7486	68.5208	12.8462	34.9973	24.6524	23.1162	27.6984	48.9803	16.7037	64.0688
ENSG00000111371	1026.1	0.570572	0.000142308	12	46183063	46270017	solute carrier family 38 member 1 [Source:HGNC Symbol;Acc:HGNC:13447]	SLC38A1	protein_coding	617.923	1369.71	566.89	1654.52	503.299	879.782	1034.94	1180.95	930.947	1092.57	1064.08	958.163	478.817	1224.74	809.896	1612.6	1654.48	1875.97	1036.61	1197.31	582.363	823.465	1065.53	1328.13	667.07	806.076	611.54	1102.54
ENSG00000102010	1399.99	-0.789993	0.000142308	X	15464246	15556529	BMX non-receptor tyrosine kinase [Source:HGNC Symbol;Acc:HGNC:1079]	BMX	protein_coding	1871.63	866.332	481.223	754.014	2499.72	995.524	516.383	590.9	703.026	115.008	847.982	863.124	3179.3	837.882	2223.31	1075.86	2731.86	989.716	2699.34	2064.64	3542.35	1725.16	1872.21	1004.5	847.11	594.761	1705.63	1001.14
ENSG00000148700	6682.31	-0.399494	0.000142628	10	109996368	110135565	adducin 3 [Source:HGNC Symbol;Acc:HGNC:245]	ADD3	protein_coding	9513.25	6413.59	9605.1	5587.25	8190.48	6083.21	4170.12	4722.11	3726.2	2533.71	8033.03	6769.35	8863.36	6540.27	7428.84	7206.62	9077.18	5113.3	7144.64	6190.31	9629.33	7335.02	7784.67	5725.46	4701.8	4467	9413.45	5136.09
ENSG00000131069	427.521	-0.440574	0.000142628	20	34872146	34927962	acyl-CoA synthetase short-chain family member 2 [Source:HGNC Symbol;Acc:HGNC:15814]	ACSS2	protein_coding	426.294	362.232	767.275	445.758	433.396	397.642	362.336	334.871	540.913	333.664	788.714	749.078	528.913	307.383	408.648	347.091	379.908	309.031	387.782	274.083	541.683	293.359	253.371	206.995	368.158	320.471	748.881	352.657
ENSG00000130518	15.5886	1.18725	0.000144779	19	18257097	18274509	KIAA1683 [Source:HGNC Symbol;Acc:HGNC:29350]	KIAA1683	protein_coding	9.74386	28.0856	9.68406	4.49353	2.09708	12.0713	8.6787	11.0211	3.21016	53.9541	13.6771	50.9753	1.16501	22.9819	4.93338	15.5058	10.1502	98.0186	9.45809	7.21272	2.14104	5.14666	8.21745	10.5074	4.6164	9.79606	5.56789	13.3709
ENSG00000260035	53.035	-0.794617	0.000146306	15	45200325	45200632		CTD-2651B20.6	sense_intronic	71.4549	84.9768	153.455	47.6314	152.388	47.575	36.8845	25.4333	36.1143	17.0381	28.2661	29.3756	81.5504	20.1092	40.2892	22.6623	113.102	54.4548	62.4234	34.2604	131.674	49.4079	10.9566	13.6596	45.0099	39.1842	22.2716	13.3709
ENSG00000149516	424.076	0.774843	0.000146364	11	60056587	60071128	membrane spanning 4-domains A3 [Source:HGNC Symbol;Acc:HGNC:7317]	MS4A3	protein_coding	69.019	166.353	39.4812	29.6573	85.9802	257.047	1575.18	1453.94	560.976	1027.26	85.71	438.042	54.7553	144.595	37.8225	82.3	55.1011	66.7071	1577.61	1464.18	77.0775	84.4052	71.2179	249.024	133.876	270.091	565.141	1151.57
ENSG00000165280	3372.88	-0.38627	0.000146411	9	35056064	35073249	valosin containing protein [Source:HGNC Symbol;Acc:HGNC:12666]	VCP	protein_coding	3952.76	3163.59	5086.37	3274.88	4278.74	3578.07	2812.98	3703.08	3851.39	2117.7	3916.22	2861.53	3725.69	2303.94	3459.12	2470.19	3674.37	2999.1	3728.38	3294.41	4411.62	3147.7	2863.78	2193.94	3741.59	3011.59	4039.5	2778.36
ENSG00000074800	11520.5	-0.417886	0.000148185	1	8861002	8879249	enolase 1 [Source:HGNC Symbol;Acc:HGNC:3350]	ENO1	protein_coding	10728	7169.74	15271	9812.96	12277.7	11889.5	8744.88	7838.53	11577.5	6123.79	13766.5	9253.31	15115.9	7953.66	12378.7	8925.38	11361	9446.54	16525.2	16793	13033.6	11432.8	10023.9	9714.05	13453.3	10533.6	20263.4	11165.8
ENSG00000151239	551.828	-0.44291	0.000148405	12	43793723	43806375	twinfilin actin binding protein 1 [Source:HGNC Symbol;Acc:HGNC:9620]	TWF1	protein_coding	730.789	544.428	765.786	464.631	782.909	411.843	247.343	238.225	244.775	176.061	575.351	348.187	583.668	704.779	1009.7	593.992	1052.72	571.775	754.756	703.24	758.999	604.218	491.678	432.903	394.702	289.684	579.061	394.998
ENSG00000135525	30.7861	0.816886	0.000149828	6	136342281	136550819	microtubule associated protein 7 [Source:HGNC Symbol;Acc:HGNC:6869]	MAP7	protein_coding	22.7357	18.0036	63.3188	92.5666	9.08733	24.1425	9.76354	16.1077	21.6686	63.1831	37.3841	61.3431	6.99003	49.7942	15.6224	22.6623	10.1502	35.3956	11.3497	18.0318	12.8462	18.528	27.3915	48.3339	31.1607	53.1786	22.2716	38.9984
ENSG00000110172	375.077	-0.486784	0.000152757	11	90201160	90223364	cysteine and histidine rich domain containing 1 [Source:HGNC Symbol;Acc:HGNC:14525]	CHORDC1	protein_coding	475.013	321.904	635.423	437.669	610.249	286.16	265.785	195.836	260.023	276.16	364.723	259.196	475.322	371.541	388.092	336.357	938.169	363.486	397.24	284.902	600.562	341.738	379.372	258.481	216.971	211.315	285.818	264.632
ENSG00000188916	9.21844	-1.14859	0.000154101	10	127135426	127196158	family with sequence similarity 196 member A [Source:HGNC Symbol;Acc:HGNC:33859]	FAM196A	protein_coding	0.811988	1.44029	2.97971	0.898705	32.8542	3.55037	20.6119	9.32553	1.60508	0.709923	14.5889	1.72798	5.82503	6.70306	15.6224	5.96377	18.8504	5.44548	22.6994	1.80318	3.21156	3.08799	15.0653	7.35515	24.2361	9.79606	15.7757	5.5712
ENSG00000134255	737.792	-0.32697	0.000155275	1	111139627	111185102	choline/ethanolamine phosphotransferase 1 [Source:HGNC Symbol;Acc:HGNC:24289]	CEPT1	protein_coding	879.383	581.155	936.374	802.544	914.326	695.873	492.516	366.239	570.607	496.946	754.977	584.056	900.549	716.27	580.494	567.751	1074.47	609.894	735.84	611.278	1103.71	928.457	775.18	801.712	728.237	597.56	1082.95	768.826
ENSG00000204839	72.3334	-0.825069	0.000156223	8	143566187	143572971	maestro heat like repeat family member 6 [Source:HGNC Symbol;Acc:HGNC:27814]	MROH6	protein_coding	56.0272	19.4439	49.1652	25.1637	30.0581	40.4742	86.787	35.6066	89.082	53.9541	128.565	152.926	369.307	92.8853	97.8453	25.0478	104.402	21.7819	77.5564	39.6699	111.334	59.7012	26.0219	19.964	43.8558	27.9887	73.3106	67.4115
ENSG00000178726	388.554	0.769154	0.00015643	20	23045633	23049741	thrombomodulin [Source:HGNC Symbol;Acc:HGNC:11784]	THBD	protein_coding	366.207	660.371	330.748	1155.73	340.426	475.75	112.823	192.445	85.8719	283.259	270.807	1321.04	281.931	690.415	242.558	242.129	268.255	366.208	279.96	324.572	115.616	388.058	245.154	285.8	310.453	411.435	473.271	358.228
ENSG00000113387	1734.44	-0.471911	0.000157398	5	32531633	32604079	SUB1 homolog, transcriptional regulator [Source:HGNC Symbol;Acc:HGNC:19985]	SUB1	protein_coding	1904.11	1361.07	2315.98	1382.21	2896.06	1540.86	1702.11	1830.35	1061.76	730.511	1657.67	873.492	2282.25	1656.61	2396.8	1875.01	2865.26	1181.67	1649.49	1779.74	2655.96	1714.87	1807.84	1602.37	1286.82	1153.14	1919.07	1481.38
ENSG00000163735	244.516	-0.618046	0.000158647	4	73995642	73998779	C-X-C motif chemokine ligand 5 [Source:HGNC Symbol;Acc:HGNC:10642]	CXCL5	protein_coding	271.204	136.107	262.959	267.814	241.164	84.4989	158.386	160.23	71.4261	76.6717	196.951	77.7589	351.832	328.45	180.89	113.312	593.062	431.554	698.007	265.067	344.708	147.194	353.351	234.314	323.148	263.094	133.629	79.6682
ENSG00000134748	514.39	-0.434041	0.000161507	1	52404564	52420839	pre-mRNA processing factor 38A [Source:HGNC Symbol;Acc:HGNC:25930]	PRPF38A	protein_coding	608.991	517.062	814.206	557.197	818.559	515.514	433.935	499.34	384.417	349.992	518.819	399.162	876.084	527.627	523.76	548.667	527.811	381.184	552.353	398.503	639.101	345.855	520.439	263.735	487.03	379.248	619.892	394.441
ENSG00000253190	57.096	-0.788795	0.000161793	8	66112667	66115207		AC084082.3	lincRNA	78.7628	42.4884	148.986	36.8469	139.805	44.7347	21.6968	30.5199	20.8661	12.7786	49.2376	25.0556	79.2204	31.6001	27.1336	16.6986	120.352	70.7912	100.256	54.0954	157.367	44.2613	21.9132	27.3191	54.2427	57.3769	49.183	35.0986
ENSG00000257267	578.926	-0.372281	0.000162713	18	35290282	35310766	zinc finger protein 271, pseudogene [Source:HGNC Symbol;Acc:HGNC:13065]	ZNF271P	unitary_pseudogene	690.19	507.701	844.748	668.637	907.335	563.799	555.437	568.01	398.06	227.175	455.904	350.779	539.398	437.614	481.004	455.632	726.465	426.109	715.032	540.954	867.122	643.332	750.527	705.044	520.499	505.197	694.13	464.081
ENSG00000122008	774.301	-0.410206	0.00016396	5	75511756	75601144	DNA polymerase kappa [Source:HGNC Symbol;Acc:HGNC:9183]	POLK	protein_coding	1233.41	594.118	1202.31	772.886	953.471	801.674	518.552	376.412	775.254	556.58	852.541	729.206	841.134	704.779	716.984	765.748	917.868	585.389	713.14	582.427	1063.03	880.078	747.788	661.964	747.857	626.948	1159.98	598.904
ENSG00000229278	6.5544	-1.27954	0.000165351	10	99651989	99653905		RP11-483F11.7	antisense	15.4278	2.16043	5.21449	1.79741	19.5727	4.97052	3.25451	4.23888	8.02541	1.41985	7.29446	3.45595	13.9801	1.91516	1.64446	3.57826	20.3004	0	9.45809	10.8191	14.9873	2.05866	8.21745	0	6.9246	0	11.1358	1.67136
ENSG00000145335	15728.4	-0.827164	0.000165556	4	89724099	89838315	synuclein alpha [Source:HGNC Symbol;Acc:HGNC:11138]	SNCA	protein_coding	9104.82	1726.18	7222.07	6456.3	35539.2	11615.4	29157.2	43694.4	5303.19	3173.36	15154.3	2456.32	20327	11706.4	23855.3	20039.5	8739.33	2954.17	31279.8	22810.2	14986.2	4137.91	40872.2	22019.2	14346.6	14089.5	12034.1	5594.6
ENSG00000054219	267.905	0.780865	0.00016735	2	159803355	159904749	lymphocyte antigen 75 [Source:HGNC Symbol;Acc:HGNC:6729]	LY75	protein_coding	237.912	325.505	134.087	440.366	62.9123	244.976	177.913	521.382	205.45	363.481	109.417	266.972	67.5703	427.081	393.848	484.258	79.7516	127.969	264.827	311.95	215.175	318.063	225.98	342.54	305.837	316.273	294.17	235.662
ENSG00000138594	2548.79	-0.395904	0.00016735	15	51829628	51947295	tropomodulin 3 [Source:HGNC Symbol;Acc:HGNC:11873]	TMOD3	protein_coding	3639.33	2757.43	3460.19	3118.51	3658.7	2509.4	1604.47	1543.8	1412.47	1089.02	2646.98	3128.5	3282.99	2364.26	2694.45	2378.35	3667.12	2142.8	2924.44	2210.7	3225.48	2240.85	3119.89	1743.17	2053.14	1628.95	3290.62	1830.14
ENSG00000119013	854.303	-0.464755	0.000168304	2	201071433	201085750	NADH:ubiquinone oxidoreductase subunit B3 [Source:HGNC Symbol;Acc:HGNC:7698]	NDUFB3	protein_coding	1200.93	566.032	1501.03	878.035	1486.83	939.429	550.013	484.928	564.989	256.992	823.363	633.303	825.989	848.416	711.228	741.893	1165.82	724.249	889.061	829.462	1187.21	1062.27	1113.46	732.363	815.949	622.75	1079.24	685.258
ENSG00000137806	237.977	-0.524011	0.000168304	15	41387349	41402519	NADH:ubiquinone oxidoreductase complex assembly factor 1 [Source:HGNC Symbol;Acc:HGNC:18828]	NDUFAF1	protein_coding	285.008	232.606	279.348	194.12	236.97	193.14	154.047	119.536	209.463	106.488	235.246	234.141	467.167	184.813	227.758	172.949	333.507	112.994	300.767	205.562	402.516	335.562	261.589	225.908	233.128	190.323	324.794	203.906
ENSG00000117525	8.42839	-1.34081	0.000170206	1	94529225	94541800	coagulation factor III, tissue factor [Source:HGNC Symbol;Acc:HGNC:3541]	F3	protein_coding	4.05994	0.720143	17.1333	0.898705	17.4756	0.710075	1.08484	0	2.40762	1.41985	107.593	0	15.1451	0.95758	9.86675	1.19275	5.80012	0	3.78324	1.80318	14.9873	8.23465	1.36958	7.35515	5.7705	1.39944	3.71193	1.11424
ENSG00000104081	56.5137	0.982154	0.000170283	15	40087890	40108892	Bcl2 modifying factor [Source:HGNC Symbol;Acc:HGNC:24132]	BMF	protein_coding	34.1035	66.9733	14.1536	54.821	11.1844	61.0664	113.908	26.281	102.725	161.152	41.9432	139.102	30.2901	105.334	35.3559	81.1073	31.9006	70.7912	11.3497	37.8668	13.9168	32.9386	19.1741	45.1816	57.705	74.1702	14.8477	93.039
ENSG00000102786	1698.6	-0.421267	0.000170283	13	51354077	51454264	integrator complex subunit 6 [Source:HGNC Symbol;Acc:HGNC:14879]	INTS6	protein_coding	1875.69	1363.95	1682.05	1240.21	2274.63	1395.3	1088.09	1077.52	1169.3	964.785	1748.85	1547.4	2537.38	1640.33	2184.66	1588.75	3501.82	1332.78	2360.74	1985.3	2384.05	1642.81	1877.69	1486.79	1331.83	1182.52	1653.66	1441.83
ENSG00000156140	191.042	-1.1449	0.000170283	4	72280969	72569386	ADAM metallopeptidase with thrombospondin type 1 motif 3 [Source:HGNC Symbol;Acc:HGNC:219]	ADAMTS3	protein_coding	197.313	30.9661	90.1362	79.0861	165.669	208.762	40.139	19.4988	270.456	9.93892	491.465	266.972	610.463	92.8853	306.692	184.877	346.557	29.9501	359.408	225.397	599.492	158.517	102.718	42.0294	26.5443	19.5921	300.666	72.9827
ENSG00000185880	788.232	-0.444823	0.000170694	15	44728988	44767829	tripartite motif containing 69 [Source:HGNC Symbol;Acc:HGNC:17857]	TRIM69	protein_coding	937.034	602.039	826.87	879.832	1263.14	844.989	604.255	373.869	598.695	486.297	602.705	535.673	864.434	565.93	621.605	602.341	1006.32	556.8	455.88	360.636	1855.21	1571.79	747.788	564.245	899.044	716.512	1509.83	616.732
ENSG00000166507	20.5234	-0.853993	0.000170694	10	73801911	73811798	N-deacetylase and N-sulfotransferase 2 [Source:HGNC Symbol;Acc:HGNC:7681]	NDST2	protein_coding	26.7956	7.20143	21.6029	12.5819	28.6601	8.52089	18.4422	15.26	20.0635	12.7786	54.7085	32.8315	45.4352	13.4061	30.4225	10.7348	27.5506	12.2523	9.45809	18.0318	52.4555	22.6453	6.84788	8.40589	12.6951	6.99719	25.0555	12.8138
ENSG00000167565	146.595	-0.554671	0.00017107	19	40440844	40444705	SERTA domain containing 3 [Source:HGNC Symbol;Acc:HGNC:17931]	SERTAD3	protein_coding	103.122	93.6186	237.632	106.047	221.591	89.4694	137.774	126.319	117.974	87.3205	208.804	184.029	354.162	154.17	337.114	166.986	156.603	85.7663	98.3642	68.5208	156.296	128.666	116.414	83.0081	124.643	107.757	129.917	122.566
ENSG00000106772	191.173	-0.843093	0.000172124	9	76611376	76906087	prune homolog 2 [Source:HGNC Symbol;Acc:HGNC:25209]	PRUNE2	protein_coding	127.482	111.622	364.27	154.577	109.048	17.7519	190.931	286.548	78.649	25.5572	172.332	110.59	1512.18	273.868	94.5564	56.0594	44.9509	25.866	32.1575	34.2604	502.074	152.341	49.3047	30.4713	152.341	85.3657	305.306	252.375
ENSG00000121766	359.289	-0.484649	0.000173413	1	31296982	31364953	zinc finger CCHC-type containing 17 [Source:HGNC Symbol;Acc:HGNC:30246]	ZCCHC17	protein_coding	420.61	304.62	418.649	281.295	350.212	282.61	442.614	240.768	329.844	186	532.496	231.549	418.237	284.401	399.603	323.236	435.009	254.576	321.575	362.439	682.992	379.823	410.873	400.33	310.453	347.06	418.52	289.702
ENSG00000085491	1585.95	-0.565301	0.000175348	1	108134036	108200849	solute carrier family 25 member 24 [Source:HGNC Symbol;Acc:HGNC:20662]	SLC25A24	protein_coding	2557.76	1281.85	3171.16	1687.77	1757.35	1714.83	707.314	634.984	1459.82	655.969	1800.82	1480.88	1661.3	1101.22	1419.99	1663.89	2180.84	921.647	1331.7	1355.99	2787.64	2052.49	1750.32	1026.57	1484.17	1049.58	2720.84	987.774
ENSG00000197579	853.947	0.421449	0.000175379	9	32540544	32552553	TOP1 binding arginine/serine rich protein [Source:HGNC Symbol;Acc:HGNC:21653]	TOPORS	protein_coding	639.847	900.178	692.783	1035.31	690.637	953.63	650.903	958.834	586.657	694.305	482.346	569.368	490.467	1284.11	962.831	1114.03	952.669	1025.11	775.564	888.967	528.837	818.319	901.181	1127.44	1015.61	1532.38	803.632	834.566
ENSG00000225783	498.348	-0.622563	0.000175379	22	26646428	26676475	myocardial infarction associated transcript (non-protein coding) [Source:HGNC Symbol;Acc:HGNC:33425]	MIAT	lincRNA	698.31	311.102	190.701	156.375	496.308	360.008	580.388	439.148	1180.54	428.083	532.496	364.603	1095.11	683.712	278.736	217.081	933.819	385.268	1269.28	777.17	275.124	198.661	268.437	133.443	166.19	65.7736	528.022	939.861
ENSG00000168016	1277.43	0.690191	0.000180184	3	36826820	36945057	tetratricopeptide repeat and ankyrin repeat containing 1 [Source:HGNC Symbol;Acc:HGNC:29011]	TRANK1	protein_coding	1075.88	1713.22	646.597	1969.06	617.24	1193.64	983.948	1641.29	533.69	2240.52	681.121	1536.17	361.152	767.022	926.652	906.493	817.816	1897.75	1080.11	887.164	614.479	1156.97	1376.42	1028.67	2959.11	3952.01	958.605	1245.16
ENSG00000167515	79.326	0.513902	0.000180184	16	88856220	88862686	trafficking protein particle complex 2 like [Source:HGNC Symbol;Acc:HGNC:30887]	TRAPPC2L	protein_coding	46.2833	95.0588	58.1044	87.1744	53.126	102.961	107.399	122.08	107.54	114.298	60.1793	66.5271	58.2503	72.7761	50.9782	96.6131	56.5511	96.6573	66.2067	93.7653	41.7503	61.7599	53.4134	102.972	79.6329	83.9662	77.0225	108.081
ENSG00000176024	143.464	-0.423101	0.000181239	19	51927147	51948759	zinc finger protein 613 [Source:HGNC Symbol;Acc:HGNC:25827]	ZNF613	protein_coding	177.013	119.544	207.835	175.247	149.592	132.074	97.6354	76.2998	168.534	105.779	137.683	106.271	184.071	108.207	138.135	138.359	171.103	122.523	145.655	128.026	304.028	157.488	115.044	105.074	140.8	110.556	181.884	112.538
ENSG00000279227	33.1205	-0.931358	0.000183464	2	118014174	118015673		AC009303.2	TEC	46.2833	21.6043	48.4203	19.7715	20.9708	17.7519	17.3574	7.62998	48.1525	8.51907	48.3258	41.4714	113.006	24.8971	34.5336	33.3971	49.301	6.80685	30.2659	30.654	99.5584	23.6746	15.0653	12.6088	8.0787	9.79606	62.1748	27.2989
ENSG00000070540	1158.61	-0.460661	0.000184324	17	68420948	68457513	WD repeat domain, phosphoinositide interacting 1 [Source:HGNC Symbol;Acc:HGNC:25471]	WIPI1	protein_coding	1969.07	1013.24	1341.61	949.931	1053.43	1067.95	696.466	822.342	869.954	375.549	1270.15	752.533	1331.6	865.652	1651.86	1209.45	1073.02	978.825	1641.93	1383.04	1755.65	1216.67	1668.14	1032.87	1118.32	960.014	1426.31	945.433
ENSG00000187116	14229.9	-0.618643	0.000184324	19	54307070	54313139	leukocyte immunoglobulin like receptor A5 [Source:HGNC Symbol;Acc:HGNC:16309]	LILRA5	protein_coding	18558	7105.65	21605.1	16152.4	16345.3	18531.5	8617.95	8734.63	8177.89	3775.37	18145	17704	18183.4	13674.2	17894.2	11982.4	15745.9	7254.74	16738.9	12788.1	14659.7	12716.4	17967.5	6769.89	15110.6	9400.02	33914.9	10184.7
ENSG00000204305	70.8079	0.599032	0.000184846	6	32180968	32184324	advanced glycosylation end-product specific receptor [Source:HGNC Symbol;Acc:HGNC:320]	AGER	protein_coding	64.147	125.305	34.2667	78.1873	34.9513	48.9951	53.157	70.3654	35.3118	102.939	72.9446	113.182	79.2204	145.552	52.6227	78.7218	62.3513	84.4049	45.3988	55.8985	54.5966	52.4959	49.3047	61.9934	90.0198	79.7679	50.111	106.41
ENSG00000147164	330.599	-0.482679	0.000187761	X	71056332	71073426	sorting nexin 12 [Source:HGNC Symbol;Acc:HGNC:14976]	SNX12	protein_coding	373.514	240.528	446.957	246.245	356.503	308.882	280.973	286.548	334.66	198.778	364.723	324.859	595.318	219.286	339.581	267.177	387.158	212.374	406.698	380.471	493.51	375.706	301.307	251.126	324.302	268.692	418.52	252.375
ENSG00000227165	35.0871	-0.895225	0.000188082	10	120761812	120851345	WDR11 antisense RNA 1 [Source:HGNC Symbol;Acc:HGNC:27437]	WDR11-AS1	antisense	80.3868	46.0891	13.4087	5.39223	29.3591	2.13022	26.0361	5.93443	4.0127	2.12977	10.0299	5.18393	54.7553	29.685	36.1781	32.2044	102.952	40.8411	13.2413	5.40954	102.77	37.0559	119.153	74.6023	26.5443	37.7848	26.9115	12.2566
ENSG00000203965	48.0653	0.659323	0.000192812	1	63523372	63572693	EF-hand calcium binding domain 7 [Source:HGNC Symbol;Acc:HGNC:29379]	EFCAB7	protein_coding	64.959	129.626	29.0522	52.1249	32.1552	53.2556	37.9693	34.7588	47.3499	36.916	25.5306	39.7434	29.1251	62.2427	39.467	66.7942	36.2507	58.5389	28.3743	82.9462	20.3399	60.7306	52.0439	73.5515	17.3115	32.1871	44.5431	57.9405
ENSG00000188107	14.7109	0.91406	0.000195076	6	63719980	65707225	eyes shut homolog (Drosophila) [Source:HGNC Symbol;Acc:HGNC:21555]	EYS	protein_coding	14.6158	14.4029	5.21449	14.3793	9.78636	17.7519	7.59386	13.5644	3.21016	8.51907	4.55904	10.3679	9.32005	21.0668	12.3334	23.8551	10.1502	57.1775	5.67486	19.835	8.56417	20.5866	15.0653	36.7758	9.2328	11.1955	12.0638	15.0422
ENSG00000100209	52.0897	-0.724098	0.000195451	22	28742031	28757515	HscB mitochondrial iron-sulfur cluster cochaperone [Source:HGNC Symbol;Acc:HGNC:28913]	HSCB	protein_coding	52.7792	27.3654	128.872	31.4547	99.9607	48.9951	48.8177	39.8455	78.649	35.4961	75.6801	27.6476	90.8704	34.4729	41.1115	38.1681	68.1514	29.9501	39.724	37.8668	70.6544	43.2319	34.2394	35.725	49.6263	53.1786	54.7509	41.2269
ENSG00000163710	274.816	-1.17129	0.000197081	3	142815922	142889203	procollagen C-endopeptidase enhancer 2 [Source:HGNC Symbol;Acc:HGNC:8739]	PCOLCE2	protein_coding	769.765	57.6114	238.377	133.907	106.951	377.05	56.4116	48.3232	598.695	117.847	467.758	386.203	376.297	187.686	149.646	94.2276	339.307	93.9345	96.4726	28.8509	966.68	187.338	424.568	49.3846	246.977	47.5809	962.317	84.6822
ENSG00000099910	100.021	0.562353	0.000200447	22	20441519	20495883	kelch like family member 22 [Source:HGNC Symbol;Acc:HGNC:25888]	KLHL22	protein_coding	56.8392	72.0143	67.7884	119.528	43.3396	127.103	111.738	149.209	151.68	166.832	67.4738	133.054	41.9402	92.8853	101.134	102.577	42.0508	68.0685	60.5318	102.781	38.5387	72.0532	124.631	130.291	132.722	191.723	106.718	125.352
ENSG00000171659	106.512	1.19554	0.000200944	X	41688973	41697277	G protein-coupled receptor 34 [Source:HGNC Symbol;Acc:HGNC:4490]	GPR34	protein_coding	39.7874	69.1337	206.345	238.157	42.6406	343.676	37.9693	70.3654	20.0635	26.2671	49.2376	110.59	43.1052	402.184	24.6669	288.646	5.80012	123.885	9.45809	183.924	8.56417	67.9359	78.0658	107.175	58.8591	93.7623	109.502	122.566
ENSG00000215529	13.7635	1.06553	0.000202978	20	32858923	32961609	EF-hand calcium binding domain 8 [Source:HGNC Symbol;Acc:HGNC:34532]	EFCAB8	protein_coding	18.6757	18.7237	7.44928	23.3663	6.29123	16.3317	10.8484	7.62998	4.0127	29.1068	2.73542	16.4158	4.66002	39.2608	14.8001	26.2406	7.25015	24.5047	0	14.4254	4.28208	8.23465	13.6958	22.0655	5.7705	15.3938	9.27982	13.928
ENSG00000111860	585.411	0.673957	0.000203454	6	118460772	118710075	centrosomal protein 85 like [Source:HGNC Symbol;Acc:HGNC:21638]	CEP85L	protein_coding	665.018	900.899	354.586	732.445	181.048	833.627	424.172	479.841	609.931	654.549	399.372	594.424	250.476	938.428	471.137	760.977	392.958	676.601	482.363	901.589	329.72	747.295	668.353	872.111	383.161	421.231	669.075	596.118
ENSG00000102893	1377.05	-0.285849	0.000203539	16	47461123	47701523	phosphorylase kinase regulatory subunit beta [Source:HGNC Symbol;Acc:HGNC:8927]	PHKB	protein_coding	1562.26	1098.94	1682.05	1313.01	1467.25	1117.66	1302.89	954.595	1188.56	969.755	1499.92	1057.52	1684.6	1356.89	1581.97	1480.21	1164.37	1068.68	1588.96	1163.05	1910.88	1525.47	1558.58	1454.22	1301.83	1438.62	1676.86	1387.79
ENSG00000177409	2901.35	-0.561216	0.00020956	7	93130055	93148369	sterile alpha motif domain containing 9 like [Source:HGNC Symbol;Acc:HGNC:1349]	SAMD9L	protein_coding	3332.4	1011.8	2476.14	2017.59	2733.19	2304.9	2338.91	1152.13	1866.71	2126.93	1976.8	1706.38	2543.21	2331.71	2490.53	2148.15	2633.25	1132.66	2215.09	1727.45	11116.3	6860.49	2985.67	1827.23	5403.5	3714.11	4850.56	2213.99
ENSG00000196372	60.4925	0.680891	0.000211799	10	5638867	5666595	ankyrin repeat and SOCS box containing 13 [Source:HGNC Symbol;Acc:HGNC:19765]	ASB13	protein_coding	51.1552	59.7718	61.829	64.7068	43.3396	100.121	41.2238	84.7776	103.528	97.9694	29.1779	75.1669	24.4651	40.2184	60.0227	113.312	23.2005	66.7071	34.0491	84.7494	16.0578	53.5252	41.0873	67.2471	62.3214	65.7736	60.3188	67.9686
ENSG00000101310	1212.92	-0.421956	0.000211799	20	18507493	18561415	Sec23 homolog B, coat complex II component [Source:HGNC Symbol;Acc:HGNC:10702]	SEC23B	protein_coding	1851.33	1212	1693.97	1259.09	1537.16	1152.45	847.258	956.291	1259.19	655.969	1109.67	865.716	1604.21	886.719	1077.12	1134.31	1213.67	754.199	1138.75	1161.25	1812.39	1351.51	1484.62	1229.36	1111.4	734.705	1791	1076.36
ENSG00000172572	143.418	-0.765222	0.000213031	12	20369245	20684381	phosphodiesterase 3A [Source:HGNC Symbol;Acc:HGNC:8778]	PDE3A	protein_coding	129.918	152.67	100.565	100.655	155.184	35.5037	182.253	83.9298	9.63049	9.229	120.359	38.8795	206.206	135.019	175.957	87.071	197.204	84.4049	200.512	39.6699	340.426	196.602	327.329	140.799	233.128	233.706	156.829	142.066
ENSG00000005249	3272.96	-0.640427	0.000214748	7	107044649	107161811	protein kinase cAMP-dependent type II regulatory subunit beta [Source:HGNC Symbol;Acc:HGNC:9392]	PRKAR2B	protein_coding	4689.23	5210.95	2657.16	2256.65	3682.47	1046.65	4697.35	2503.48	452.633	259.832	2645.16	701.558	3223.57	2847.84	5264.73	2847.1	4387.79	3020.88	3253.58	1177.48	4725.28	3392.68	5946.7	4962.63	4958.01	4552.37	3651.61	2627.38
ENSG00000032444	579.062	-0.745933	0.000214997	19	7534004	7561764	patatin like phospholipase domain containing 6 [Source:HGNC Symbol;Acc:HGNC:16268]	PNPLA6	protein_coding	344.283	189.398	1121.12	177.944	525.667	303.202	743.114	441.691	380.404	356.381	2159.16	1478.28	1438.78	362.923	423.448	252.864	466.909	148.389	533.436	288.509	806.102	474.522	291.72	271.09	462.794	579.367	630.1	562.134
ENSG00000088992	960.697	-0.691862	0.00021521	12	117038923	117099479	tescalcin [Source:HGNC Symbol;Acc:HGNC:26065]	TESC	protein_coding	935.41	174.275	660.751	562.589	1231.68	746.998	1143.42	1865.95	966.259	352.122	823.363	380.155	1280.34	621.469	1193.88	770.519	682.964	386.629	2042.95	1702.2	1105.85	517.754	2058.47	1234.61	1187.57	1084.56	768.369	418.397
ENSG00000273247	180.837	-0.376334	0.000216867	4	139411927	139454034		RP11-83A24.2	antisense	279.324	159.872	149.73	141.097	247.455	154.796	113.908	91.5598	158.101	117.137	148.625	147.742	231.836	186.728	275.447	188.455	274.056	221.903	191.053	146.057	226.95	187.338	227.35	143.951	175.423	138.544	179.1	159.893
ENSG00000253616	32.9704	0.863962	0.000224392	8	23071377	23074488		RP11-875O11.3	antisense	17.8637	26.6453	15.6435	82.6809	27.262	68.8772	21.6968	27.9766	16.8534	26.2671	7.29446	21.5997	3.49502	40.2184	24.6669	35.7826	29.0006	59.9003	11.3497	21.6381	6.42312	16.4693	35.609	63.0442	58.8591	76.9691	41.7592	37.327
ENSG00000100218	9.96555	1.07897	0.00022777	22	23059415	23145021	radial spoke head 14 homolog [Source:HGNC Symbol;Acc:HGNC:13437]	RSPH14	protein_coding	12.1798	25.9251	13.4087	14.3793	2.7961	12.0713	4.33935	7.62998	3.21016	3.54961	3.64723	11.2318	2.33001	14.3637	4.93338	13.1203	4.35009	24.5047	5.67486	9.01589	2.14104	19.5573	8.21745	14.7103	3.4623	26.5893	5.56789	6.12832
ENSG00000197632	65.5453	-0.726331	0.000228029	18	63871692	63903890	serpin family B member 2 [Source:HGNC Symbol;Acc:HGNC:8584]	SERPINB2	protein_coding	67.395	37.4474	46.9304	27.8599	118.135	64.6168	73.769	74.6043	113.158	51.1144	93.9162	66.5271	44.2702	20.1092	96.2008	42.9391	82.6517	23.1433	69.9899	66.7176	192.694	42.2026	31.5002	45.1816	80.787	53.1786	63.1028	45.1267
ENSG00000196684	98.07	0.759504	0.000229144	19	16134028	16158575	hematopoietic SH2 domain containing [Source:HGNC Symbol;Acc:HGNC:24920]	HSH2D	protein_coding	42.2234	69.1337	27.5623	57.5171	58.7182	70.2974	149.708	214.487	65.8084	220.076	22.7952	133.918	66.4053	180.983	112.645	69.1797	50.751	103.464	49.1821	79.3399	92.0648	89.5518	58.8918	114.53	150.033	246.301	50.111	100.282
ENSG00000143995	127.463	-0.642491	0.000229144	2	66433452	66573869	Meis homeobox 1 [Source:HGNC Symbol;Acc:HGNC:7000]	MEIS1	protein_coding	180.261	118.103	67.7884	64.7068	150.99	39.0541	100.89	49.171	18.4584	17.0381	57.4439	29.3756	246.981	160.873	160.335	81.1073	133.403	108.91	272.393	102.781	427.138	202.778	232.828	161.813	105.023	113.354	80.7344	85.2394
ENSG00000153574	1095.18	-0.635946	0.000230811	2	88691644	88750935	ribose 5-phosphate isomerase A [Source:HGNC Symbol;Acc:HGNC:10297]	RPIA	protein_coding	563.52	186.517	587.748	424.189	1766.44	801.674	2563.47	2400.05	569.001	397.557	1820.88	421.626	1040.35	860.864	1294.19	1074.67	581.462	356.679	2773.11	2367.57	626.255	279.978	1769.49	901.531	1039.84	1190.92	1167.4	837.908
ENSG00000072422	284.995	-0.7589	0.000231243	10	60869438	61001440	Rho related BTB domain containing 1 [Source:HGNC Symbol;Acc:HGNC:18738]	RHOBTB1	protein_coding	340.223	363.672	177.293	113.237	481.629	75.2679	493.601	182.272	32.9042	17.7481	171.42	57.8872	257.466	190.558	393.848	258.828	436.459	240.962	310.225	84.7494	992.373	445.701	412.242	341.489	249.286	292.482	296.954	269.089
ENSG00000213203	367.968	0.69637	0.000231305	7	150716557	150724284	GTPase, IMAP family member 1 [Source:HGNC Symbol;Acc:HGNC:23237]	GIMAP1	protein_coding	276.888	455.13	275.623	747.723	278.911	675.281	321.112	278.918	670.924	549.48	261.689	628.119	170.091	383.99	109.357	344.706	223.304	309.031	155.113	387.683	156.296	468.346	272.546	360.402	362.387	380.647	422.232	377.17
ENSG00000047648	185.167	-0.731416	0.000232336	X	11137543	11665701	Rho GTPase activating protein 6 [Source:HGNC Symbol;Acc:HGNC:676]	ARHGAP6	protein_coding	152.654	218.923	125.893	82.6809	240.465	61.7765	259.276	103.429	72.2287	37.6259	104.858	69.983	229.506	114.91	331.358	132.396	230.555	112.994	264.827	54.0954	429.279	398.351	283.502	160.763	264.289	267.293	204.156	176.607
ENSG00000259959	34.3619	1.04045	0.000234987	4	47840122	47844339		RP11-121C2.2	lincRNA	6.4959	6.48128	9.68406	50.3275	2.09708	17.7519	7.59386	11.0211	19.261	38.3358	51.0613	65.6631	3.49502	12.4485	27.9558	23.8551	37.7008	378.461	5.67486	54.0954	3.21156	6.17599	8.21745	17.8625	39.2394	44.782	3.71193	9.47104
ENSG00000069966	265.439	-0.732027	0.000235533	15	52115105	52191369	G protein subunit beta 5 [Source:HGNC Symbol;Acc:HGNC:4401]	GNB5	protein_coding	203.809	294.538	205.6	166.26	392.852	102.961	482.753	221.269	113.158	66.0228	262.601	88.1268	355.327	192.474	346.159	161.022	307.406	289.972	340.491	64.9144	366.118	231.6	457.438	240.619	469.719	440.823	313.658	254.604
ENSG00000174010	338.764	-0.500709	0.000236643	X	23983720	24027186	kelch like family member 15 [Source:HGNC Symbol;Acc:HGNC:29347]	KLHL15	protein_coding	346.719	265.013	436.528	301.066	626.327	262.017	176.829	209.401	260.023	184.58	446.786	310.172	426.392	388.777	730.14	350.67	691.664	315.838	334.817	311.95	406.798	226.453	313.633	231.162	250.44	211.315	254.267	215.605
ENSG00000075142	607.009	-0.43643	0.000236656	7	88205118	88226993	sorcin [Source:HGNC Symbol;Acc:HGNC:11292]	SRI	protein_coding	666.642	396.078	752.377	604.829	819.258	693.033	481.668	477.298	719.077	356.381	588.116	555.544	704.828	443.36	620.783	453.247	694.564	394.797	660.175	685.208	736.518	512.607	651.918	580.006	638.217	524.789	1057.9	527.036
ENSG00000175782	179.81	0.696683	0.000237077	12	68746106	68793964	solute carrier family 35 member E3 [Source:HGNC Symbol;Acc:HGNC:20864]	SLC35E3	protein_coding	160.774	174.275	217.519	308.256	47.5337	241.425	112.823	137.34	142.05	219.366	203.333	288.572	119.996	299.723	114.29	217.081	52.2011	182.424	92.6893	192.94	79.2185	160.576	145.175	157.61	167.345	278.488	290.458	231.205
ENSG00000149084	432.803	-0.464764	0.000238012	11	43680558	43856617	hydroxysteroid 17-beta dehydrogenase 12 [Source:HGNC Symbol;Acc:HGNC:18646]	HSD17B12	protein_coding	470.141	363.672	968.406	418.797	650.094	427.465	324.366	399.302	280.087	205.168	496.024	273.02	442.702	366.753	377.403	277.912	667.013	367.57	567.486	443.582	959.187	524.959	495.786	408.736	178.886	172.131	323.866	267.975
ENSG00000104915	1118.47	0.615305	0.00023834	19	13144058	13150383	syntaxin 10 [Source:HGNC Symbol;Acc:HGNC:11428]	STX10	protein_coding	1085.63	1282.57	623.504	1271.67	447.376	1527.37	880.888	921.532	979.902	944.907	443.139	1071.35	648.908	1548.41	948.853	1077.06	582.912	980.186	686.658	1291.08	654.088	1668.55	1303.84	1580.31	1498.02	1809.47	1789.15	1769.97
ENSG00000188811	299.309	-0.463422	0.000238989	13	39038306	39050109	NHL repeat containing 3 [Source:HGNC Symbol;Acc:HGNC:33751]	NHLRC3	protein_coding	314.239	155.551	272.644	212.993	366.289	284.03	235.41	175.49	272.061	242.794	498.759	407.802	440.372	316.001	385.626	324.429	519.11	185.146	372.649	274.083	529.908	301.594	197.219	156.56	203.122	207.117	295.098	234.548
ENSG00000083223	4175.68	0.380834	0.00023958	9	86287733	86354454	zinc finger CCHC-type containing 6 [Source:HGNC Symbol;Acc:HGNC:25817]	ZCCHC6	protein_coding	3902.41	4495.85	2911.92	4439.6	3325.27	4740.46	3228.48	3332.61	2300.88	3432.48	3675.5	4670.72	3003.38	6674.33	5873.18	6412.25	3825.18	5150.06	3376.54	5115.62	2920.38	3978.37	3548.57	4097.87	3951.64	4626.54	4976.77	4932.18
ENSG00000271605	418.277	-0.501362	0.000239768	17	64449037	64468643	mast cell immunoglobulin like receptor 1 [Source:HGNC Symbol;Acc:HGNC:27570]	MILR1	protein_coding	388.13	187.957	452.916	412.506	453.668	509.123	287.482	167.012	524.862	387.618	820.627	688.598	192.226	194.389	609.272	364.983	459.659	216.458	109.714	106.388	426.067	362.325	513.591	322.576	864.421	477.208	823.12	388.87
ENSG00000197386	680.892	-0.608495	0.00024036	4	3074681	3243959	huntingtin [Source:HGNC Symbol;Acc:HGNC:4851]	HTT	protein_coding	627.667	620.043	1156.87	558.995	1331.64	664.63	701.89	918.141	757.599	642.48	1085.96	1121.46	1047.34	279.613	647.094	394.802	842.467	458.782	822.854	360.636	620.902	378.794	502.634	268.988	732.854	467.412	588.34	464.081
ENSG00000101104	38.9419	0.785606	0.000244183	20	44910062	44959035	poly(A) binding protein cytoplasmic 1 like [Source:HGNC Symbol;Acc:HGNC:15797]	PABPC1L	protein_coding	33.2915	41.0481	22.3478	35.0495	10.4854	27.6929	30.3755	36.4544	24.8788	85.9007	45.5904	63.9351	15.1451	72.7761	36.1781	53.6739	39.1508	99.38	18.9162	34.2604	13.9168	37.0559	35.609	38.8772	45.0099	33.5865	15.7757	44.0125
ENSG00000118515	651.149	0.821357	0.000245317	6	134169246	134318112	serum/glucocorticoid regulated kinase 1 [Source:HGNC Symbol;Acc:HGNC:10810]	SGK1	protein_coding	226.545	488.977	1313.31	1265.38	142.601	612.794	734.435	746.89	524.059	1193.38	620.03	946.067	64.0753	503.687	596.116	562.98	165.303	431.554	285.634	405.715	101.699	440.554	412.242	1379.62	1307.6	1525.39	547.509	688.043
ENSG00000166035	17.9947	-0.841645	0.000246695	15	58410569	58569843	lipase C, hepatic type [Source:HGNC Symbol;Acc:HGNC:6619]	LIPC	protein_coding	14.6158	10.082	9.68406	11.6832	10.4854	4.26045	21.6968	6.78221	20.0635	18.458	21.8834	7.77589	15.1451	10.5334	20.5557	10.7348	44.9509	17.6978	7.56647	3.60636	42.8208	21.616	36.9785	11.5581	42.7017	27.9887	24.1275	7.79968
ENSG00000110756	373.792	-0.386413	0.000247163	11	18278668	18322198	HPS5, biogenesis of lysosomal organelles complex 2 subunit 2 [Source:HGNC Symbol;Acc:HGNC:17022]	HPS5	protein_coding	338.599	259.972	628.719	324.433	547.337	374.919	322.197	250.094	445.41	326.565	454.992	314.492	517.262	288.232	357.67	298.189	382.808	280.442	351.841	329.982	514.92	446.73	308.155	353.047	410.86	345.661	385.112	307.53
ENSG00000139190	68.0187	0.648556	0.000247754	12	6462237	6470987	vesicle associated membrane protein 1 [Source:HGNC Symbol;Acc:HGNC:12642]	VAMP1	protein_coding	60.0871	78.4956	23.8377	47.6314	23.7669	39.7642	29.2906	51.7143	51.3626	108.618	63.8266	78.6229	61.7453	170.449	44.4004	85.8783	95.7019	193.315	69.9899	59.5049	50.3145	67.9359	64.3701	52.5368	55.3968	64.3741	26.9115	84.6822
ENSG00000182087	265.92	0.438496	0.000248045	19	1009648	1021179	transmembrane protein 259 [Source:HGNC Symbol;Acc:HGNC:17039]	TMEM259	protein_coding	127.482	313.262	148.986	177.045	176.154	198.111	297.246	328.937	225.514	409.625	259.865	431.13	343.677	444.317	233.513	255.249	195.754	247.769	172.137	189.334	213.034	247.04	210.915	276.344	266.597	373.65	257.979	425.083
ENSG00000107566	1283.72	-0.78892	0.000249141	10	100150094	100188334	ER lipid raft associated 1 [Source:HGNC Symbol;Acc:HGNC:16947]	ERLIN1	protein_coding	2052.71	1170.95	3397.61	1145.85	2949.89	976.352	566.285	691.785	713.459	424.534	2486.5	650.583	2693.49	580.293	1327.08	1271.48	783.016	1112.24	1087.68	1529.1	2183.86	1099.33	827.224	317.322	527.424	321.871	2178.9	877.464
ENSG00000259207	2452.54	-0.721246	0.000249753	17	47253846	47311816	integrin subunit beta 3 [Source:HGNC Symbol;Acc:HGNC:6156]	ITGB3	protein_coding	2620.29	3535.9	1841.46	1733.6	2751.37	975.642	3950.98	2510.26	418.124	151.214	3158.5	1446.32	4274.41	1304.22	3418.01	1603.06	1986.54	2314.33	3317.9	699.633	2888.26	2155.42	3752.64	1803.06	4470.98	3840.06	3358.37	2390.6
ENSG00000185272	20.3553	-0.889466	0.000249753	21	14216130	14228372	RNA binding motif protein 11 [Source:HGNC Symbol;Acc:HGNC:9897]	RBM11	protein_coding	22.7357	15.123	21.6029	12.5819	29.3591	4.97052	21.6968	15.26	21.6686	8.51907	8.20627	2.59196	30.2901	19.1516	15.6224	7.15652	58.0012	19.0592	26.4827	18.0318	82.4301	15.44	21.9132	19.964	15.0033	9.79606	13.9197	13.3709
ENSG00000076662	6665.84	0.400018	0.000255643	19	10333776	10339823	intercellular adhesion molecule 3 [Source:HGNC Symbol;Acc:HGNC:5346]	ICAM3	protein_coding	4767.99	5823.07	4258.75	5930.56	3581.81	7447.97	3977.01	5153.63	4286.37	4652.12	5201.87	7608.28	5778.43	10296.9	6143.7	7214.97	4751.75	6940.26	6249.91	7084.69	4767.03	8623.74	9960.92	9742.42	9393.22	10834.4	7878.57	8293.29
ENSG00000147119	64.9948	0.754075	0.000256515	X	46573784	46598408	carbohydrate sulfotransferase 7 [Source:HGNC Symbol;Acc:HGNC:13817]	CHST7	protein_coding	12.9918	33.8467	43.9507	117.73	15.3786	54.6757	95.4657	116.145	65.8084	185.29	62.003	102.815	6.99003	33.5153	19.7335	20.2768	26.1005	17.6978	24.591	27.0477	13.9168	25.7333	26.0219	55.689	215.817	215.513	65.8867	119.224
ENSG00000171617	276.421	0.661998	0.000260611	5	74627406	74641424	ectodermal-neural cortex 1 [Source:HGNC Symbol;Acc:HGNC:3345]	ENC1	protein_coding	104.746	216.043	75.9826	168.957	230.678	945.819	130.181	176.337	598.695	654.549	98.4753	289.436	65.2403	139.807	760.562	920.806	78.3016	164.726	185.379	207.366	72.7954	155.429	228.719	262.684	166.19	183.326	241.275	217.277
ENSG00000197043	2581.79	-0.446218	0.000260611	5	151100712	151157882	annexin A6 [Source:HGNC Symbol;Acc:HGNC:544]	ANXA6	protein_coding	3803.35	1673.61	2263.09	1838.75	2540.26	2432.72	2700.16	2097.4	4186.86	2563.53	2766.43	2337.95	2792.52	1446.9	2240.57	2398.63	2621.65	1571.02	2583.95	2811.16	4047.64	2431.28	3328.07	2295.86	2346.29	1816.47	3691.51	2662.48
ENSG00000057294	54.475	-0.774896	0.000260611	12	32790745	32896840	plakophilin 2 [Source:HGNC Symbol;Acc:HGNC:9024]	PKP2	protein_coding	81.1988	43.2086	174.313	38.6443	45.4367	19.172	42.3087	25.4333	60.9931	47.5648	112.152	31.1036	53.5903	48.8366	32.0669	40.5536	42.0508	17.6978	35.9408	36.0636	134.886	41.1733	54.783	46.2324	24.2361	18.1927	115.07	62.3974
ENSG00000169891	1102.41	0.495643	0.000262278	X	16946691	17153280	RALBP1 associated Eps domain containing 2 [Source:HGNC Symbol;Acc:HGNC:9963]	REPS2	protein_coding	1680	1816.92	731.519	1326.49	859.103	879.072	513.128	901.186	542.518	859.007	720.328	1388.43	1276.85	2270.42	1151.12	1504.06	981.67	1880.05	1042.28	1173.87	528.837	969.63	1346.29	971.931	920.972	1066.37	560.501	1005.04
ENSG00000178146	44.107	-0.676217	0.000266662	X	101778969	101780538		RP1-232L22__B.1	processed_pseudogene	51.1552	28.0856	49.1652	43.1378	59.4172	38.344	72.6841	38.1499	29.694	37.6259	87.5336	45.7914	72.2303	35.4305	71.534	29.8189	33.3507	6.80685	7.56647	10.8191	74.9364	48.3786	36.9785	27.3191	43.8558	36.3854	85.3743	33.4272
ENSG00000077238	4883.3	-0.655784	0.00026857	16	27313668	27364778	interleukin 4 receptor [Source:HGNC Symbol;Acc:HGNC:6015]	IL4R	protein_coding	5690.41	4335.98	4754.13	5249.34	10126.8	3881.27	2278.16	3818.38	4131.48	2802.07	4922.85	6311.43	8615.22	3457.82	7171.48	3755.98	12342.6	4827.42	7299.76	3602.75	4451.22	2608.33	4141.6	1899.73	4661.41	2108.95	4919.23	2566.65
ENSG00000164924	11116.9	-0.375027	0.000270233	8	100916525	100953388	tyrosine 3-monooxygenase/tryptophan 5-monooxygenase activation protein zeta [Source:HGNC Symbol;Acc:HGNC:12855]	YWHAZ	protein_coding	11755.1	10833.1	14635.6	10862.6	14262.2	9522.81	7338.93	8704.96	7331.21	5204.44	10449.3	11320.8	14852.7	10232.7	16979.9	12698.1	16521.6	10277	12993.5	10164.5	12920.1	10177	12602.8	8778.9	10280.7	8090.15	13910.4	7572.38
ENSG00000135047	331.932	-0.831213	0.000270525	9	87725519	87731393	cathepsin L [Source:HGNC Symbol;Acc:HGNC:2537]	CTSL	protein_coding	111.242	76.3351	838.044	123.123	1170.17	337.995	286.397	178.033	304.163	141.985	365.635	454.458	530.078	103.419	250.78	153.865	139.203	85.7663	181.595	173.105	372.541	338.65	162.979	151.306	630.139	503.797	918.702	210.591
ENSG00000106603	185.297	0.541745	0.000271358	7	43608456	43729717	cytochrome c oxidase assembly factor 1 homolog [Source:HGNC Symbol;Acc:HGNC:21868]	COA1	protein_coding	159.15	184.357	143.026	166.26	150.99	145.565	219.137	250.942	142.852	242.084	94.828	198.717	126.986	259.504	165.268	171.757	140.653	189.23	109.714	245.232	126.321	297.477	194.48	184.93	182.348	349.859	124.35	222.291
ENSG00000228242	77.269	0.813977	0.000276506	3	14144637	14165978		AC093495.4	antisense	76.3269	122.424	46.1855	91.6679	92.9704	115.032	39.0542	52.5621	33.7067	115.717	18.2362	66.5271	17.4751	111.079	63.3117	114.504	100.052	324.006	58.6402	72.1272	7.49364	33.9679	78.0658	57.7905	81.9411	93.7623	37.1193	41.784
ENSG00000105355	2072.51	-0.497053	0.000279579	19	4838341	4867768	perilipin 3 [Source:HGNC Symbol;Acc:HGNC:16893]	PLIN3	protein_coding	1947.96	1540.39	3225.54	2453.46	3125.34	2495.91	1518.77	1760.83	1874.74	1075.53	2558.53	3023.09	3144.35	1367.42	2403.38	1539.85	2090.94	1097.26	2347.5	1725.64	1930.15	1718.98	1840.71	1133.74	2455.93	1693.32	3462.3	1478.6
ENSG00000135272	260.45	0.519219	0.000279684	7	114922154	115019916	MyoD family inhibitor domain containing [Source:HGNC Symbol;Acc:HGNC:28870]	MDFIC	protein_coding	129.106	271.494	156.435	303.762	211.106	366.398	276.634	334.024	366.761	328.694	140.418	160.702	131.646	316.959	197.335	390.031	361.057	396.159	226.994	311.95	132.745	248.069	305.415	430.802	229.666	209.916	154.973	203.349
ENSG00000100523	214.45	0.533312	0.000280532	14	53036745	53153282	DDHD domain containing 1 [Source:HGNC Symbol;Acc:HGNC:19714]	DDHD1	protein_coding	162.398	210.282	89.3913	215.689	155.184	242.135	224.561	200.923	259.221	445.832	125.83	285.98	80.3854	202.049	223.646	217.081	194.304	220.542	215.645	229.004	198.046	256.304	232.828	368.808	151.187	198.72	145.693	252.932
ENSG00000198355	1021.7	-0.627157	0.000280532	22	49960513	49964080	Pim-3 proto-oncogene, serine/threonine kinase [Source:HGNC Symbol;Acc:HGNC:19310]	PIM3	protein_coding	345.095	470.973	1298.41	659.65	1320.46	771.851	1092.43	631.593	1115.53	746.839	2072.54	1220.81	1840.71	1118.45	1190.59	478.294	891.768	311.754	1532.21	625.703	1634.69	922.281	480.721	848.995	1229.12	932.025	1660.16	1163.82
ENSG00000136861	1530.26	-0.481173	0.000283438	9	120388869	120580170	CDK5 regulatory subunit associated protein 2 [Source:HGNC Symbol;Acc:HGNC:18672]	CDK5RAP2	protein_coding	2586.99	1565.59	1696.2	1005.65	1755.25	1251.86	835.325	642.614	1276.84	562.259	1269.24	1049.75	1628.68	1367.42	2358.98	1257.16	2030.04	2619.28	1827.3	1529.1	1737.46	1910.44	2163.93	1228.31	1652.67	1108.35	1906.07	1024.54
ENSG00000122566	3547.53	-0.487081	0.000284265	7	26189927	26201529	heterogeneous nuclear ribonucleoprotein A2/B1 [Source:HGNC Symbol;Acc:HGNC:5033]	HNRNPA2B1	protein_coding	2846.83	3155.67	5096.79	3404.29	5663.51	2951.78	3523.55	3528.44	2889.15	2930.56	4806.14	3398.06	6412.19	2441.83	4888.15	4519.35	4627.04	3489.19	3198.73	2499.21	4990.77	2438.49	2259.8	1410.09	3827	2507.79	3427.04	2199.51
ENSG00000104164	1443.04	-0.415451	0.000285343	15	45587123	45615999	biogenesis of lysosomal organelles complex 1 subunit 6 [Source:HGNC Symbol;Acc:HGNC:8549]	BLOC1S6	protein_coding	1515.17	876.414	1456.33	1046.09	1904.15	1222.04	1792.15	1856.63	1248.75	699.274	1277.44	794.869	1415.48	1574.26	2044.88	1748.58	1550.08	909.395	1672.19	1518.28	1732.1	1345.34	1926.99	1598.17	1605.35	1461.01	1689.85	923.705
ENSG00000047346	358.434	0.403731	0.000288662	15	52581317	52709817	family with sequence similarity 214 member A [Source:HGNC Symbol;Acc:HGNC:25609]	FAM214A	protein_coding	408.43	447.209	308.4	391.835	224.387	344.386	338.469	626.506	321.819	439.442	369.282	484.697	208.536	384.947	458.804	496.186	261.005	460.143	329.142	396.699	283.688	250.128	356.09	391.925	228.512	305.077	213.436	306.973
ENSG00000114988	85.6404	-0.478462	0.000289121	2	96705929	96740064	lectin, mannose binding 2 like [Source:HGNC Symbol;Acc:HGNC:19263]	LMAN2L	protein_coding	77.9508	69.1337	177.293	79.9848	92.9704	79.5283	53.157	45.7799	135.629	70.9923	95.7398	57.0232	89.7054	53.6245	72.3562	56.0594	102.952	88.489	69.9899	54.0954	149.873	92.6398	84.9137	68.2978	102.715	83.9662	106.718	86.3536
ENSG00000115548	1327.24	0.439994	0.000291866	2	86440647	86492716	lysine demethylase 3A [Source:HGNC Symbol;Acc:HGNC:20815]	KDM3A	protein_coding	851.775	1386.27	1350.55	1632.95	840.229	1294.47	1131.49	1425.96	751.981	983.243	1647.64	1516.3	806.184	2023.37	1658.44	2022.91	1042.57	2130.54	1409.26	1649.91	569.517	852.287	1149.07	1356.5	1529.18	1980.2	1038.41	1131.51
ENSG00000242125	67.5697	0.559756	0.00029348	1	28505980	28510892	small nucleolar RNA host gene 3 [Source:HGNC Symbol;Acc:HGNC:10118]	SNHG3	sense_intronic	52.7792	83.5366	36.5015	69.2003	46.8347	63.9067	97.6354	114.45	60.1906	78.8014	45.5904	60.4792	34.9502	74.6912	71.534	70.3725	62.3513	100.741	49.1821	84.7494	42.8208	85.4345	35.609	69.3486	61.1673	46.1814	60.3188	132.595
ENSG00000108039	458.154	-0.469375	0.000297253	10	109864766	109923553	X-prolyl aminopeptidase 1 [Source:HGNC Symbol;Acc:HGNC:12822]	XPNPEP1	protein_coding	526.168	360.071	318.829	176.146	465.551	311.723	623.782	308.59	350.71	277.58	462.287	189.213	576.678	483.578	609.272	304.152	414.708	371.654	474.796	375.061	864.981	745.236	668.353	610.478	586.283	495.401	426.872	450.153
ENSG00000188191	98.6296	-0.676784	0.000297253	7	549197	727650	protein kinase cAMP-dependent type I regulatory subunit beta [Source:HGNC Symbol;Acc:HGNC:9390]	PRKAR1B	protein_coding	72.2669	91.4581	38.7362	26.0624	68.5045	34.0836	246.258	111.059	26.4838	15.6183	77.5037	26.7836	205.041	114.91	139.779	62.0232	56.5511	38.1184	132.413	27.0477	244.079	133.813	91.7616	97.7184	180.04	167.932	130.845	104.739
ENSG00000198513	49.2186	-0.710399	0.000297253	14	50532509	50633068	atlastin GTPase 1 [Source:HGNC Symbol;Acc:HGNC:11231]	ATL1	protein_coding	51.9672	37.4474	39.4812	12.5819	63.6113	18.4619	68.3448	27.1288	8.02541	9.93892	25.5306	7.77589	43.1052	42.1335	87.9785	35.7826	65.2513	44.9252	58.6402	30.654	127.392	63.8186	95.8703	84.0589	62.3214	58.7764	60.3188	46.7981
ENSG00000160781	19.3969	0.973719	0.000297888	1	156243321	156248117	progestin and adipoQ receptor family member 6 [Source:HGNC Symbol;Acc:HGNC:30132]	PAQR6	protein_coding	24.3596	57.6114	6.70435	17.9741	5.59221	2.8403	9.76354	33.0633	14.4457	47.5648	11.8535	25.0556	8.15504	51.7093	15.6224	8.34928	14.5003	50.3707	15.1329	18.0318	12.8462	25.7333	6.84788	11.5581	12.6951	20.9916	0.927982	12.8138
ENSG00000087095	499.15	-0.390268	0.000298979	17	28041737	28196381	nemo like kinase [Source:HGNC Symbol;Acc:HGNC:29858]	NLK	protein_coding	728.353	479.615	306.165	329.825	536.852	332.315	457.801	267.897	327.437	275.45	402.107	356.827	703.663	466.341	656.961	479.487	697.464	393.436	624.234	443.582	900.308	604.218	754.636	647.253	413.168	443.622	493.686	453.496
ENSG00000163956	2697.77	-0.40945	0.00030202	4	3506376	3532559	LDL receptor related protein associated protein 1 [Source:HGNC Symbol;Acc:HGNC:6701]	LRPAP1	protein_coding	2659.26	1950.15	5283.77	3316.22	3392.37	3561.02	1610.98	1366.61	2048.89	1098.25	4056.63	2797.59	2984.74	1873.98	2175.62	2045.57	2517.25	1937.23	2360.74	2791.32	4167.54	3214.6	2544.67	1554.04	2654.43	2170.53	4791.17	2612.34
ENSG00000143398	550.887	-0.35365	0.000306087	1	151197949	151249536	phosphatidylinositol-4-phosphate 5-kinase type 1 alpha [Source:HGNC Symbol;Acc:HGNC:8994]	PIP5K1A	protein_coding	616.299	532.185	797.073	616.512	864.695	565.219	354.742	399.302	511.219	364.19	575.351	585.784	622.113	391.65	536.916	436.548	819.267	559.523	593.968	515.709	632.678	506.431	495.786	379.316	596.67	484.205	679.283	392.212
ENSG00000113924	40.5601	-0.753264	0.000306087	3	120628173	120682571	homogentisate 1,2-dioxygenase [Source:HGNC Symbol;Acc:HGNC:4892]	HGD	protein_coding	87.6947	56.1711	29.0522	22.4676	53.825	11.3612	39.0542	13.5644	8.02541	14.1985	27.3542	9.50387	48.9302	27.7698	54.2671	25.0478	113.102	51.732	41.6156	18.0318	58.8786	27.792	80.805	55.689	60.0132	44.782	25.9835	28.9702
ENSG00000106617	161.788	0.572949	0.000307293	7	151556111	151877125	protein kinase AMP-activated non-catalytic subunit gamma 2 [Source:HGNC Symbol;Acc:HGNC:9386]	PRKAG2	protein_coding	134.79	249.169	140.791	235.461	80.388	167.578	146.453	105.972	146.865	185.29	94.828	226.365	72.2303	215.455	143.89	223.045	104.402	157.919	58.6402	75.7335	161.649	286.154	121.892	160.763	263.135	303.678	132.701	134.823
ENSG00000176783	1978.8	-0.439675	0.000307293	5	179550558	179610026	RUN and FYVE domain containing 1 [Source:HGNC Symbol;Acc:HGNC:19760]	RUFY1	protein_coding	1890.31	1824.12	1997.15	1942.1	1825.86	1271.03	2768.51	1155.52	830.63	699.984	2043.36	1182.8	2349.82	1441.16	2526.71	1501.68	2604.25	2018.91	1706.24	1065.68	3721.13	2724.64	2550.15	2110.93	2774.46	3239.7	2109.3	1530.41
ENSG00000110218	172.134	-0.549157	0.000307293	11	94128928	94181972	pannexin 1 [Source:HGNC Symbol;Acc:HGNC:8599]	PANX1	protein_coding	165.646	241.248	129.617	91.6679	338.328	154.796	197.44	158.534	126.801	101.519	142.242	62.2071	216.691	86.1822	197.335	126.432	298.706	172.894	111.606	104.584	283.688	215.13	288.98	193.335	200.813	107.757	176.317	129.252
ENSG00000165533	73.3058	-0.680919	0.000308589	14	88824153	88881078	tetratricopeptide repeat domain 8 [Source:HGNC Symbol;Acc:HGNC:20087]	TTC8	protein_coding	122.61	53.2906	99.0754	44.0366	60.1162	67.4571	42.3087	54.2576	144.457	37.6259	55.6203	40.6074	100.19	47.879	97.8453	83.4928	71.0514	27.2274	128.63	97.3717	82.4301	42.2026	132.849	91.414	75.0165	30.7876	68.6707	54.0406
ENSG00000132357	843.333	-0.384163	0.000310044	5	40841184	40860175	caspase recruitment domain family member 6 [Source:HGNC Symbol;Acc:HGNC:16394]	CARD6	protein_coding	958.146	588.357	1174.01	712.673	931.102	770.431	668.26	370.478	574.619	374.839	1047.67	1280.43	1439.95	1138.56	1095.21	1019.8	1077.37	731.056	788.805	631.113	1105.85	937.721	842.289	546.383	727.083	608.755	794.352	678.015
ENSG00000120438	1402.39	-0.426478	0.000312403	6	159778498	159789749	t-complex 1 [Source:HGNC Symbol;Acc:HGNC:11655]	TCP1	protein_coding	1496.49	1008.2	1711.84	1391.2	2024.38	1450.68	1126.06	1196.21	1275.24	827.77	1607.52	982.354	1748.67	1124.2	1207.85	1223.77	2285.25	981.548	1776.23	1330.75	2190.29	1291.81	1235.36	1277.69	1361.84	1209.11	1663.87	1260.76
ENSG00000143952	975.261	-0.466763	0.000315923	2	63892146	64019072	VPS54, GARP complex subunit [Source:HGNC Symbol;Acc:HGNC:18652]	VPS54	protein_coding	1598.8	684.136	1199.33	831.302	1096.07	1065.82	645.478	732.478	1028.05	559.419	1312.09	772.405	1534.31	923.107	1190.59	1185.6	774.316	638.482	1182.26	1092.73	1401.31	870.814	1072.38	577.905	776.709	661.934	1128.43	771.054
ENSG00000151689	96.8249	-0.587964	0.000319889	2	190343470	190371665	inositol polyphosphate-1-phosphatase [Source:HGNC Symbol;Acc:HGNC:6071]	INPP1	protein_coding	90.1307	49.6898	150.475	62.9094	140.504	75.978	106.314	94.9509	93.0947	69.5724	125.83	69.119	193.391	60.3275	74.8229	63.216	133.403	70.7912	104.039	104.584	145.591	84.4052	116.414	73.5515	72.7083	79.7679	103.006	102.51
ENSG00000102172	289.814	0.485453	0.000320754	X	21940573	21994835	spermine synthase [Source:HGNC Symbol;Acc:HGNC:11123]	SMS	protein_coding	174.577	409.041	275.623	449.353	254.445	289.71	336.3	304.351	264.838	239.244	160.478	231.549	135.141	338.983	163.624	233.78	218.954	310.392	372.649	477.842	157.367	225.424	287.611	467.578	251.594	352.658	321.082	410.597
ENSG00000124275	426.462	-0.465461	0.00032086	5	7851186	7906025	5-methyltetrahydrofolate-homocysteine methyltransferase reductase [Source:HGNC Symbol;Acc:HGNC:7473]	MTRR	protein_coding	652.026	378.795	509.531	477.212	378.872	345.096	207.204	174.642	476.709	275.45	470.493	601.336	584.833	440.487	590.361	478.294	855.517	390.713	385.89	283.099	584.504	401.439	486.199	353.047	371.62	183.326	381.401	222.848
ENSG00000225873	298.663	-0.677768	0.000323413	3	44421127	44439946	long intergenic non-protein coding RNA 694 [Source:HGNC Symbol;Acc:HGNC:44570]	LINC00694	protein_coding	325.607	311.102	328.513	230.069	947.879	171.128	163.81	180.576	73.0312	48.2748	247.1	215.133	547.553	167.576	346.981	244.515	865.667	490.093	410.481	284.902	395.022	179.104	271.176	122.936	140.8	123.15	308.09	222.291
ENSG00000164124	66.8093	0.688919	0.000325117	4	158201604	158255411	transmembrane protein 144 [Source:HGNC Symbol;Acc:HGNC:25633]	TMEM144	protein_coding	55.2152	57.6114	36.5015	49.4288	44.0386	75.978	82.4477	61.8876	130.012	149.084	63.8266	136.51	23.3001	95.758	42.7559	107.348	65.2513	98.0186	24.591	70.324	36.3977	65.8772	26.0219	44.1309	40.3935	47.5809	38.9752	101.396
ENSG00000100483	136.86	0.55545	0.000325192	14	50108632	50116600	valosin containing protein lysine methyltransferase [Source:HGNC Symbol;Acc:HGNC:20352]	VCPKMT	protein_coding	147.782	193.718	77.4725	116.832	104.155	149.116	67.2599	143.274	94.6998	137.725	132.212	150.334	83.8804	299.723	181.713	207.539	210.254	217.819	119.172	194.743	84.5711	96.7572	80.805	109.277	93.4821	117.553	65.8867	154.322
ENSG00000274536	4213.58	-0.700963	0.000325192	X	66015461	66020422	microRNA 223 [Source:HGNC Symbol;Acc:HGNC:31603]	MIR223	antisense	6205.21	2042.32	3395.38	1898.96	6942.72	1953.41	2283.58	2203.37	2264.77	2207.86	11371.2	2181.57	6102.3	4307.19	6849.99	5118.11	6156.82	3372.11	4399.91	4769.41	5186.67	4186.29	5461.87	2116.18	2438.61	1633.14	5684.82	5246.4
ENSG00000153310	6442.8	-0.357439	0.000327242	8	129839593	130017129	family with sequence similarity 49 member B [Source:HGNC Symbol;Acc:HGNC:25216]	FAM49B	protein_coding	7916.88	5333.38	7428.42	6057.27	8377.12	6274.22	3491.01	3866.7	3405.18	2800.65	5778.13	4660.35	7984.95	6778.71	9139.9	6716.4	9902.25	6364.4	7638.36	7333.53	7467.95	6704.04	7571.01	5435.46	6868.05	5526.38	9145.26	4432.45
ENSG00000102158	1215.14	-0.437895	0.0003274	X	77826364	77895593	magnesium transporter 1 [Source:HGNC Symbol;Acc:HGNC:28880]	MAGT1	protein_coding	1438.84	814.481	1819.86	1277.06	1670.67	1598.38	865.7	837.602	1457.41	739.74	1419.69	920.147	1374.71	1187.4	1126.45	969.709	1496.43	839.965	1012.02	1123.38	1478.39	1147.7	1262.75	1069.65	1283.36	932.025	1942.27	918.134
ENSG00000050426	159.156	0.382835	0.000328589	12	51047962	51060424	LETM1 domain containing 1 [Source:HGNC Symbol;Acc:HGNC:24241]	LETMD1	protein_coding	155.902	196.599	105.035	142.894	110.446	182.489	170.32	194.141	187.795	201.618	150.448	139.966	113.006	144.595	99.4898	155.058	134.853	196.037	153.221	229.004	126.321	198.661	153.392	171.27	133.876	209.916	134.557	165.465
ENSG00000148484	2135.21	-0.331747	0.000328821	10	16590611	16817528	Ras suppressor protein 1 [Source:HGNC Symbol;Acc:HGNC:10464]	RSU1	protein_coding	3062.01	2211.56	1869.02	2165.88	1905.54	1277.42	2381.22	1853.24	979.902	703.534	1490.81	974.578	2385.93	1929.52	3149.96	2380.74	2146.04	1573.74	2636.92	1999.73	3994.11	2556.86	2693.96	2388.32	2263.19	2297.88	2329.23	2185.02
ENSG00000196141	38.07	-0.738434	0.00033244	2	200305881	200482263	spermatogenesis associated serine rich 2 like [Source:HGNC Symbol;Acc:HGNC:24574]	SPATS2L	protein_coding	21.9237	26.6453	105.035	25.1637	104.155	50.4153	33.63	25.4333	24.8788	23.4275	41.9432	16.4158	29.1251	23.9395	31.2447	8.34928	40.6008	28.5888	18.9162	16.2286	132.745	65.8772	43.8264	26.2684	32.3148	18.1927	33.4073	17.2707
ENSG00000235453	148.139	0.564363	0.000332739	9	32551144	32567005	TOPORS antisense RNA 1 [Source:HGNC Symbol;Acc:HGNC:31420]	TOPORS-AS1	protein_coding	106.37	168.513	66.2986	157.273	72.6987	164.737	158.386	161.077	93.8973	125.656	82.9745	96.7666	68.7353	242.268	143.89	159.829	60.9012	89.8504	187.27	243.429	137.027	167.781	146.545	212.249	170.807	310.675	169.821	182.178
ENSG00000143570	652.329	-0.369124	0.000332739	1	153959099	153968184	solute carrier family 39 member 1 [Source:HGNC Symbol;Acc:HGNC:12876]	SLC39A1	protein_coding	630.103	594.118	1274.57	964.311	1186.25	756.939	477.329	450.169	451.028	390.458	957.398	812.149	785.214	641.579	693.962	463.981	790.266	468.311	429.397	387.683	521.344	514.666	441.003	343.591	844.801	625.548	909.422	459.624
ENSG00000168497	3140.21	-0.666257	0.000336126	2	191834302	191847255	serum deprivation response [Source:HGNC Symbol;Acc:HGNC:10690]	SDPR	protein_coding	5009.97	4991.31	2233.29	2203.62	3503.52	838.598	3930.37	1776.94	567.396	462.16	2405.35	619.479	4273.24	2876.57	4690.82	2604.97	4795.25	3437.46	2606.65	842.085	6620.1	3770.44	6620.53	5727.56	3403.44	3187.92	2161.27	1765.51
ENSG00000101331	4.66942	-1.22821	0.000336126	20	32010450	32032180	CCM2 like scaffolding protein [Source:HGNC Symbol;Acc:HGNC:16153]	CCM2L	protein_coding	0	0	5.95942	1.79741	4.19415	0	8.6787	0	7.22287	3.54961	18.2362	4.31994	3.49502	0.95758	6.57783	0	1.45003	1.36137	9.45809	0	6.42312	6.17599	10.9566	4.20294	8.0787	2.79887	12.0638	2.7856
ENSG00000108576	30.7697	-0.892059	0.000338383	17	30194319	30236002	solute carrier family 6 member 4 [Source:HGNC Symbol;Acc:HGNC:11050]	SLC6A4	protein_coding	29.2316	32.4064	14.8986	9.88576	49.6308	4.26045	44.4783	17.8033	2.40762	0.709923	15.5007	8.63988	41.9402	18.194	72.3562	23.8551	52.2011	21.7819	20.8078	3.60636	58.8786	25.7333	80.805	43.0802	66.9378	48.9803	24.1275	28.4131
ENSG00000204371	92.0424	0.583919	0.000342681	6	31879759	31897687	euchromatic histone lysine methyltransferase 2 [Source:HGNC Symbol;Acc:HGNC:14129]	EHMT2	protein_coding	46.2833	175.715	83.4319	132.11	79.6889	91.5996	86.787	145.817	142.852	144.824	69.2974	114.046	51.2602	76.6064	38.6448	45.3247	78.3016	122.523	68.0983	70.324	44.9619	97.7865	71.2179	83.0081	101.561	138.544	58.4629	118.109
ENSG00000182810	66.8314	0.579334	0.000343795	16	68021274	68023442	DEAD-box helicase 28 [Source:HGNC Symbol;Acc:HGNC:17330]	DDX28	protein_coding	44.6593	72.7344	61.829	62.9094	37.0484	88.0492	96.5506	108.515	94.6998	89.4503	50.1494	66.5271	44.2702	78.5216	32.0669	87.071	27.5506	53.0934	45.3988	90.1589	29.9746	61.7599	53.4134	76.7037	70.4001	95.1617	66.8147	85.7965
ENSG00000266698	20.8672	-0.989665	0.000344586	4	184851013	184851110	microRNA 3945 [Source:HGNC Symbol;Acc:HGNC:38954]	MIR3945	miRNA	17.8637	11.5223	25.3275	8.98705	60.8152	11.3612	11.9332	10.1733	8.02541	2.12977	84.7982	8.63988	24.4651	11.491	27.1336	15.5058	110.202	20.4205	9.45809	5.40954	16.0578	18.528	12.3262	12.6088	12.6951	8.39662	10.2078	7.79968
ENSG00000278730	230.188	-0.374824	0.000350108	17	68126666	68129586		RP11-147L13.11	lincRNA	275.264	277.255	271.154	186.032	197.125	147.695	231.07	168.707	257.616	207.297	320.045	217.725	290.086	157.043	342.87	225.431	278.406	249.131	168.354	128.026	279.406	197.632	247.893	177.574	243.515	208.516	237.563	256.832
ENSG00000010610	124.007	0.640346	0.000353949	12	6786858	6820808	CD4 molecule [Source:HGNC Symbol;Acc:HGNC:1678]	CD4	protein_coding	47.0953	105.141	119.188	191.424	137.009	186.04	77.0235	286.548	250.393	403.946	81.1509	254.876	54.7553	58.4124	106.068	91.8421	78.3016	149.751	49.1821	70.324	33.1861	54.5546	72.5875	79.8559	145.417	142.743	52.895	92.4819
ENSG00000168958	962.33	-0.372497	0.000354433	2	227325151	227357836	mitochondrial fission factor [Source:HGNC Symbol;Acc:HGNC:24858]	MFF	protein_coding	1116.48	743.907	1150.91	940.046	1408.54	1006.18	615.103	560.38	869.954	543.801	1036.73	738.71	1255.88	1206.55	1300.77	1102.1	1239.77	759.644	868.253	894.377	1039.48	911.988	942.268	802.762	812.487	691.322	1600.77	786.096
ENSG00000050393	238.441	-0.483556	0.000354433	6	13786557	13814568	mitochondrial calcium uniporter regulator 1 [Source:HGNC Symbol;Acc:HGNC:21097]	MCUR1	protein_coding	351.591	273.654	235.397	158.172	301.979	154.086	357.996	225.508	131.617	88.0304	178.714	73.439	231.836	196.304	342.047	186.07	272.605	181.062	257.26	160.483	387.528	250.128	306.785	305.764	301.22	340.063	204.156	222.848
ENSG00000224177	138.232	-0.732803	0.000355435	2	11393981	11403077	long intergenic non-protein coding RNA 570 [Source:HGNC Symbol;Acc:HGNC:43717]	LINC00570	lincRNA	243.596	59.7718	113.974	153.679	238.368	95.8601	305.924	325.546	68.216	30.5267	99.3871	52.7033	165.431	57.4548	100.312	84.6855	120.352	65.3457	302.659	275.886	139.168	44.2613	232.828	147.103	122.335	116.153	84.4463	24.5133
ENSG00000243273	46.425	0.922218	0.000355843	3	150890636	151038818		RP11-166N6.2	antisense	69.831	270.774	14.1536	22.4676	30.7571	23.4325	49.9025	60.1921	11.2356	12.7786	5.47085	14.6878	26.7951	102.461	43.5782	112.119	10.1502	54.4548	13.2413	28.8509	6.42312	73.0825	60.2613	51.4861	17.3115	18.1927	27.8395	67.9686
ENSG00000100632	626.982	-0.426182	0.00035769	14	69380123	69398627	enhancer of rudimentary homolog (Drosophila) [Source:HGNC Symbol;Acc:HGNC:3447]	ERH	protein_coding	730.789	416.963	832.084	679.421	831.841	779.662	557.607	473.059	836.248	411.755	523.378	457.914	793.369	390.693	701.362	801.531	482.86	371.654	790.697	721.272	869.263	585.69	673.831	452.867	643.988	500.999	762.801	481.909
ENSG00000100300	6447.4	-0.500356	0.000357932	22	43151514	43163242	translocator protein [Source:HGNC Symbol;Acc:HGNC:1158]	TSPO	protein_coding	6690.78	3080.05	7242.93	5773.28	7286.64	8173.67	3741.61	4274.48	9166.62	3129.34	6225.83	5350.68	9195.39	6507.71	5244.18	3462.56	5034.5	3113.45	7922.1	7301.07	10393.7	7237.23	7416.25	4646.35	7001.93	4522.98	13367.6	8024.2
ENSG00000180190	83.6833	-0.752161	0.000357932	8	489792	545781	testis development related protein [Source:HGNC Symbol;Acc:HGNC:26951]	TDRP	protein_coding	77.9508	70.574	42.4609	26.0624	113.242	14.9116	108.484	41.541	7.22287	7.09923	41.0314	16.4158	99.0255	75.6488	170.201	97.8058	130.503	53.0934	158.896	45.0795	169.142	116.314	138.327	109.277	103.869	99.36	115.998	93.5962
ENSG00000078053	56.6634	1.20625	0.000358951	7	38383704	38631567	amphiphysin [Source:HGNC Symbol;Acc:HGNC:471]	AMPH	protein_coding	64.147	445.768	22.3478	74.5925	62.9123	47.575	5.42419	16.1077	18.4584	14.1985	20.9716	73.439	25.6301	182.898	9.86675	81.1073	8.70018	129.33	1.89162	45.0795	4.28208	62.7892	20.5436	35.725	10.3869	1.39944	38.0473	62.9546
ENSG00000102024	10.4137	-0.966692	0.000364616	X	115561174	115650861	plastin 3 [Source:HGNC Symbol;Acc:HGNC:9091]	PLS3	protein_coding	8.93187	9.36186	37.9913	11.6832	9.78636	2.8403	17.3574	8.47776	4.81525	1.41985	3.64723	2.59196	11.6501	7.66064	21.378	3.57826	7.25015	4.08411	13.2413	1.80318	12.8462	7.20532	19.1741	11.5581	25.3902	11.1955	10.2078	4.45696
ENSG00000173451	78.6107	-0.490238	0.000368	12	71663009	71680639	THAP domain containing 2 [Source:HGNC Symbol;Acc:HGNC:20854]	THAP2	protein_coding	114.49	64.0927	109.504	86.2757	107.65	80.9485	45.5632	30.5199	78.649	41.1755	50.1494	44.9274	81.5504	72.7761	46.8671	46.5174	137.753	59.9003	102.147	63.1113	206.61	120.432	112.305	80.9067	45.0099	37.7848	70.5266	62.9546
ENSG00000149100	785.646	0.502918	0.000371894	11	32583798	32606262	eukaryotic translation initiation factor 3 subunit M [Source:HGNC Symbol;Acc:HGNC:24460]	EIF3M	protein_coding	928.102	1276.81	644.362	760.305	474.638	980.613	794.101	753.673	1006.39	797.243	509.701	566.776	475.322	991.095	465.382	947.047	475.61	878.083	497.496	1007.98	586.645	1063.3	790.245	1125.34	691.306	888.643	762.801	859.079
ENSG00000171867	638.011	-0.555968	0.000374008	20	4686236	4701590	prion protein [Source:HGNC Symbol;Acc:HGNC:9449]	PRNP	protein_coding	831.476	661.811	907.322	408.012	1027.57	628.416	565.2	572.249	1025.65	595.625	492.376	362.875	1064.82	240.353	689.028	484.258	910.618	694.299	556.136	510.3	694.768	598.042	658.766	509.607	676.303	540.183	613.396	344.857
ENSG00000272449	24.0139	0.82462	0.00037695	1	2546465	2547460		RP3-395M20.12	lincRNA	7.30789	31.6863	15.6435	42.2391	11.8834	34.7937	32.5451	27.9766	29.694	26.2671	10.0299	31.9676	17.4751	40.2184	13.1557	13.1203	4.35009	10.891	7.56647	16.2286	17.1283	29.8506	19.1741	49.3846	24.2361	53.1786	23.1995	31.1987
ENSG00000224429	13.6868	0.947378	0.00038065	13	21303515	21348721	long intergenic non-protein coding RNA 539 [Source:HGNC Symbol;Acc:HGNC:43672]	LINC00539	lincRNA	8.93187	14.4029	11.9188	19.7715	4.19415	22.7224	27.1209	16.9555	4.0127	7.09923	10.0299	30.2396	3.49502	23.9395	3.28892	10.7348	14.5003	29.9501	7.56647	18.0318	4.28208	10.2933	6.84788	15.761	6.9246	16.7932	11.1358	22.2848
ENSG00000167716	190.568	0.538342	0.000385866	17	1716523	1738599	WD repeat domain 81 [Source:HGNC Symbol;Acc:HGNC:26600]	WDR81	protein_coding	151.842	203.8	105.78	148.286	108.349	206.632	237.579	709.588	197.425	273.32	146.801	196.125	117.666	147.467	64.9561	103.77	82.6517	187.869	251.585	230.807	95.2763	179.104	171.197	169.168	237.745	225.309	145.693	240.119
ENSG00000123562	458.437	-0.420199	0.000385866	X	103675496	103688158	mortality factor 4 like 2 [Source:HGNC Symbol;Acc:HGNC:16849]	MORF4L2	protein_coding	372.702	360.792	649.577	381.95	730.482	423.914	441.529	394.216	463.869	322.305	535.231	273.02	559.203	428.038	476.893	375.718	694.564	394.797	453.988	396.699	585.575	431.29	323.22	417.142	481.26	348.46	646.803	472.995
ENSG00000119638	1215.79	-0.503855	0.000387793	14	75079353	75127344	NIMA related kinase 9 [Source:HGNC Symbol;Acc:HGNC:18591]	NEK9	protein_coding	1413.67	1114.78	1813.9	1160.23	1374.98	1136.83	994.796	1174.17	1190.97	816.411	1588.37	1501.61	2254.29	703.821	1359.15	1034.12	1183.22	770.535	1409.26	1121.58	1471.97	1129.18	1081.96	542.18	918.664	747.3	2048.06	986.102
ENSG00000112335	7947.21	-0.560432	0.000388002	6	108211222	108261260	sorting nexin 3 [Source:HGNC Symbol;Acc:HGNC:11174]	SNX3	protein_coding	11311.8	4176.83	7913.37	7310.97	13946.3	7728.45	6378.85	9605.3	6032.7	2411.61	7566.18	5124.31	9825.66	6921.39	8760.03	8259.82	7989.66	3448.35	16330.3	12674.5	9036.26	6108.05	9959.55	6124.74	6168.67	5378.04	10652.3	5377.88
ENSG00000126882	358.663	0.454867	0.000388577	9	131258076	131276547	family with sequence similarity 78 member A [Source:HGNC Symbol;Acc:HGNC:25465]	FAM78A	protein_coding	332.103	433.526	268.174	359.482	154.485	398.352	290.736	313.677	499.18	562.969	310.927	502.841	283.096	427.081	169.379	349.477	301.606	385.268	253.477	301.131	276.194	459.082	347.872	309.967	433.942	535.984	342.425	440.125
ENSG00000114656	25.2602	0.897798	0.00039131	3	128909866	129002690	KIAA1257 [Source:HGNC Symbol;Acc:HGNC:29231]	KIAA1257	protein_coding	14.6158	28.0856	21.6029	31.4547	12.5825	27.6929	14.1029	27.1288	12.0381	53.2442	16.4125	20.7357	15.1451	44.0487	31.2447	48.9029	4.35009	58.5389	17.0246	28.8509	5.3526	20.5866	32.8698	15.761	23.082	46.1814	11.1358	24.5133
ENSG00000197063	283.051	-0.67775	0.000391597	17	81918270	81927714	MAF bZIP transcription factor G [Source:HGNC Symbol;Acc:HGNC:6781]	MAFG	protein_coding	315.863	313.262	311.38	113.237	408.231	127.103	256.022	252.637	220.699	145.534	387.518	355.963	927.344	244.183	397.959	177.72	421.959	186.508	382.107	182.121	407.868	287.183	202.697	121.885	190.427	153.938	180.028	254.047
ENSG00000161904	395.945	-0.28053	0.000391715	6	33771202	33789136	LEM domain containing 2 [Source:HGNC Symbol;Acc:HGNC:21244]	LEMD2	protein_coding	405.182	350.71	504.316	375.659	506.794	399.062	296.161	278.918	457.448	341.473	478.699	396.57	469.497	336.111	414.404	296.996	369.757	324.006	397.24	355.226	488.157	399.381	324.589	330.982	446.637	422.63	535.445	384.413
ENSG00000179978	281.182	-0.566944	0.000397329	5	70094659	70128434		RP11-1319K7.1	unprocessed_pseudogene	408.43	148.349	607.116	479.01	200.62	266.278	113.908	80.5387	182.177	100.809	204.245	191.805	397.267	349.517	458.804	305.345	268.255	114.355	336.708	317.359	294.393	214.101	236.937	111.378	476.643	296.681	507.606	204.463
ENSG00000135049	10703.2	-0.438473	0.000398448	9	85546539	85742029	ATP/GTP binding protein 1 [Source:HGNC Symbol;Acc:HGNC:17258]	AGTPBP1	protein_coding	15122.5	6658.44	10216.7	10307.2	12219.7	12339	6052.31	6102.29	7845.64	4515.11	11349.3	9491.77	15901.2	11667.2	17844.8	12440.4	14448.1	7480.73	15297.5	12777.3	11547.7	8855.34	11842.7	8673.83	8841.56	7757.08	14550.8	7543.4
ENSG00000178917	77.3978	-0.456006	0.000404048	3	44498970	44510636	zinc finger protein 852 [Source:HGNC Symbol;Acc:HGNC:27713]	ZNF852	protein_coding	72.2669	47.5294	69.2783	54.821	97.1646	59.6463	55.3267	36.4544	76.2414	73.1221	116.711	110.59	119.996	69.9033	99.4898	72.758	126.153	92.5731	113.497	64.9144	101.699	85.4345	56.1526	24.1669	60.0132	48.9803	90.9422	71.3114
ENSG00000163743	587.591	-0.403307	0.000404719	4	75479037	75514764	ring finger and CHY zinc finger domain containing 1 [Source:HGNC Symbol;Acc:HGNC:17479]	RCHY1	protein_coding	591.127	427.765	765.786	553.602	681.55	487.111	343.894	421.345	468.684	327.274	871.689	715.382	702.498	644.451	743.295	580.871	897.568	408.411	849.337	771.761	723.672	529.076	512.221	413.99	506.65	372.25	742.385	398.898
ENSG00000140280	143.219	0.809197	0.000405895	15	51723011	51751585	LysM domain containing 2 [Source:HGNC Symbol;Acc:HGNC:28571]	LYSMD2	protein_coding	65.771	111.622	55.1246	167.159	39.8445	141.305	170.32	89.8642	77.0439	186.71	72.0328	130.462	40.7752	351.432	68.245	118.083	127.603	98.0186	41.6156	63.1113	137.027	249.098	94.5007	236.416	301.22	474.409	116.926	184.407
ENSG00000178425	80.9642	0.571156	0.000406034	6	116100849	116249497	5'-nucleotidase domain containing 1 [Source:HGNC Symbol;Acc:HGNC:21556]	NT5DC1	protein_coding	49.5313	87.8574	39.4812	56.6184	21.6698	51.1254	121.502	139.883	98.7125	136.305	82.9745	81.2149	59.4153	124.485	103.601	133.588	34.8007	66.7071	100.256	81.1431	55.6671	65.8772	58.8918	109.277	65.7837	111.955	33.4073	95.2675
ENSG00000163597	314.582	0.462682	0.000406034	17	76557766	76565348	small nucleolar RNA host gene 16 [Source:HGNC Symbol;Acc:HGNC:44352]	SNHG16	processed_transcript	271.204	452.97	201.13	212.993	182.446	286.16	340.639	489.167	332.252	466.419	258.042	183.165	336.687	511.348	308.336	515.27	243.605	313.115	334.817	461.614	141.309	360.266	236.937	353.047	214.663	249.1	241.275	310.316
ENSG00000173846	139.463	-0.668372	0.000412125	1	44800225	44805990	polo like kinase 3 [Source:HGNC Symbol;Acc:HGNC:2154]	PLK3	protein_coding	99.8745	86.4171	306.165	106.946	250.251	77.3981	117.162	118.689	57.7829	78.8014	374.753	228.957	463.672	178.11	296.825	102.577	102.952	92.5731	119.172	70.324	78.148	72.0532	50.6743	35.725	88.8657	41.9831	123.422	84.6822
ENSG00000241399	1645.88	0.666717	0.000412191	2	159768630	159798255	CD302 molecule [Source:HGNC Symbol;Acc:HGNC:30843]	CD302	protein_coding	1675.13	1711.78	1140.48	1640.14	408.231	2162.18	1050.12	1789.65	2313.73	2231.29	1363.15	1803.14	902.879	3378.34	2196.17	3255.03	497.36	1426.72	1087.68	1658.92	806.102	1545.03	1490.1	1695.89	1688.45	2117.35	1346.5	1703.12
ENSG00000138688	4513.53	-0.357131	0.000413549	4	122152333	122362758	KIAA1109 [Source:HGNC Symbol;Acc:HGNC:26953]	KIAA1109	protein_coding	4814.28	3324.9	3120.5	2787.78	4355.63	3001.48	3661.33	2936.69	3974.98	4045.14	5665.06	3766.99	6974.89	4785.98	8423.74	5292.25	5555.06	3502.8	5092.24	4372.71	6047.37	4213.05	4805.84	3312.97	4395.97	4168.92	4538.76	5441.39
ENSG00000174718	12157.2	0.480156	0.00041736	12	31959370	31993107	KIAA1551 [Source:HGNC Symbol;Acc:HGNC:25559]	KIAA1551	protein_coding	10356.9	18197.3	8648.61	13884.1	10358.2	10556.7	8811.05	10275.9	4914.76	13186.1	10230.5	11640.5	10867.2	26888.8	16315.5	16393.2	13430.2	16473.9	5585.95	7798.75	7052.59	11314.4	10759.4	13921.2	10238	14166.5	13763.8	14370.4
ENSG00000137500	443.472	-0.356185	0.000423338	11	83259097	83286407	coiled-coil domain containing 90B [Source:HGNC Symbol;Acc:HGNC:28108]	CCDC90B	protein_coding	514.8	381.676	634.678	452.049	614.444	410.423	357.996	282.309	423.742	311.656	408.49	305.852	657.063	384.947	416.048	422.235	529.261	334.897	465.338	416.534	708.685	532.164	408.134	480.186	408.551	379.248	450.999	324.801
ENSG00000168118	353.122	-0.436843	0.000425074	1	229271062	229305894	RAB4A, member RAS oncogene family [Source:HGNC Symbol;Acc:HGNC:9781]	RAB4A	protein_coding	469.329	352.15	507.296	309.155	507.493	234.325	360.166	266.202	174.151	149.794	475.964	215.997	341.347	303.553	342.87	236.165	279.856	294.056	344.275	230.807	703.332	485.844	457.438	421.345	384.315	390.443	368.409	281.346
ENSG00000080822	454.386	-0.371039	0.000430559	3	98497912	98523066	claudin domain containing 1 [Source:HGNC Symbol;Acc:HGNC:1322]	CLDND1	protein_coding	578.135	455.85	724.815	511.363	685.045	377.05	261.446	272.136	447.818	378.389	600.882	330.907	431.052	388.777	571.449	442.512	678.614	415.218	463.447	421.944	612.338	447.759	431.416	377.214	293.141	293.882	479.767	350.428
ENSG00000142961	558.87	-0.429981	0.000435211	1	46607715	46616891	MOB kinase activator 3C [Source:HGNC Symbol;Acc:HGNC:29800]	MOB3C	protein_coding	826.604	553.07	579.554	576.969	1041.55	587.942	509.874	576.487	262.431	261.252	660.149	612.567	871.424	568.803	615.85	285.068	537.961	438.361	576.944	360.636	711.896	496.138	573.852	371.961	581.667	487.004	703.41	418.954
ENSG00000067369	216.761	-0.5363	0.000436243	15	43403061	43510728	tumor protein p53 binding protein 1 [Source:HGNC Symbol;Acc:HGNC:11999]	TP53BP1	protein_coding	143.722	181.476	452.916	183.336	292.892	146.275	181.168	197.532	372.379	264.091	387.518	172.798	206.206	131.188	286.136	138.359	216.054	179.701	194.837	144.254	215.175	124.549	195.849	128.19	291.987	208.516	217.148	215.048
ENSG00000169554	4406.96	-0.324742	0.000437542	2	144384081	144524583	zinc finger E-box binding homeobox 2 [Source:HGNC Symbol;Acc:HGNC:14881]	ZEB2	protein_coding	5240.57	3903.89	5620.48	4328.16	5250.38	4463.53	3202.44	2495	3773.55	4607.4	7947.32	6467.81	5975.31	4488.18	5730.94	5112.14	5485.46	3715.18	3533.54	3404.4	3892.41	3283.57	3351.35	2331.58	3850.08	2700.91	5779.47	3459.72
ENSG00000184992	313.777	0.55143	0.000440768	12	124993700	125031231	BRI3 binding protein [Source:HGNC Symbol;Acc:HGNC:14251]	BRI3BP	protein_coding	280.136	432.086	314.359	482.605	168.465	369.239	415.493	360.305	357.933	313.786	186.009	452.73	145.626	326.535	191.579	373.332	172.553	343.065	266.718	270.477	150.943	311.887	323.22	332.033	335.843	398.84	296.026	413.94
ENSG00000105640	1300.06	0.360353	0.000440768	19	17859876	17864153	ribosomal protein L18a [Source:HGNC Symbol;Acc:HGNC:10311]	RPL18A	protein_coding	967.078	1474.13	715.875	1196.18	932.5	1249.02	1507.92	1542.1	1787.26	1837.99	924.573	835.476	676.868	1083.02	687.384	916.035	1634.18	1810.62	1522.75	1801.38	966.68	1173.44	1173.73	2057.34	1442.63	1837.46	1076.46	1571.64
ENSG00000174437	391.982	-0.427145	0.000440768	12	110280756	110351093	ATPase sarcoplasmic/endoplasmic reticulum Ca2+ transporting 2 [Source:HGNC Symbol;Acc:HGNC:812]	ATP2A2	protein_coding	519.672	400.399	335.217	215.689	483.726	311.723	425.256	284.853	517.639	446.541	676.562	553.816	568.523	253.759	555.005	320.851	413.258	322.645	304.551	286.705	381.105	336.591	360.198	225.908	474.335	331.667	296.026	373.27
ENSG00000174021	1582.02	-0.369245	0.000441322	1	84498325	84506565	G protein subunit gamma 5 [Source:HGNC Symbol;Acc:HGNC:4408]	GNG5	protein_coding	1453.46	1285.45	2181.89	1529.6	2683.56	1857.55	956.827	1097.02	963.852	569.358	1457.98	1284.75	2680.68	2270.42	2058.86	1648.39	1967.69	1251.1	1530.32	1345.17	1591.86	1430.77	1632.53	1371.21	1455.32	1004.8	2474.93	1261.32
ENSG00000204427	94.872	-0.446725	0.000441854	6	31686949	31703444	abhydrolase domain containing 16A [Source:HGNC Symbol;Acc:HGNC:13921]	ABHD16A	protein_coding	127.482	79.2157	102.055	71.8964	118.135	85.2089	66.1751	65.2787	81.8592	69.5724	107.593	82.0789	124.656	106.291	151.29	66.7942	111.652	57.1775	71.8815	59.5049	135.956	109.109	89.0224	83.0081	96.9444	75.5696	159.613	101.396
ENSG00000133639	1566.33	0.419497	0.0004438	12	92140278	92145897	BTG anti-proliferation factor 1 [Source:HGNC Symbol;Acc:HGNC:1130]	BTG1	protein_coding	1373.88	2438.4	1144.95	1700.35	1351.92	1174.46	1298.55	2214.39	901.253	1475.22	1775.29	2524.57	1199.96	1818.44	1904.28	2065.85	1521.08	2536.23	1471.68	1512.87	805.032	1441.06	1685.95	1493.1	1061.77	1267.89	1151.63	1547.12
ENSG00000058668	1481.07	-0.499219	0.0004438	1	203626561	203744081	ATPase plasma membrane Ca2+ transporting 4 [Source:HGNC Symbol;Acc:HGNC:817]	ATP2B4	protein_coding	2104.67	1274.65	1539.77	1511.62	1554.63	1386.78	815.798	603.616	1910.05	1430.49	2179.22	3417.94	1757.99	1388.49	2235.64	1312.03	3314.77	1376.34	1271.17	690.618	1102.64	725.679	1433.95	799.61	1449.55	771.09	1267.62	843.48
ENSG00000106003	566.797	0.563904	0.000449058	7	2512529	2529177	LFNG O-fucosylpeptide 3-beta-N-acetylglucosaminyltransferase [Source:HGNC Symbol;Acc:HGNC:6560]	LFNG	protein_coding	161.586	331.266	736.733	848.378	386.561	765.46	633.545	587.509	733.522	881.724	460.463	1201.81	226.011	507.517	201.446	333.971	253.755	281.804	251.585	355.226	154.155	405.557	313.633	544.281	1201.42	1570.17	870.447	670.772
ENSG00000189043	858.092	-0.442597	0.000449058	7	10931951	10940256	NDUFA4, mitochondrial complex associated [Source:HGNC Symbol;Acc:HGNC:7687]	NDUFA4	protein_coding	1069.39	494.018	1133.78	669.535	942.986	960.021	914.518	883.382	1130.78	512.564	947.369	509.753	938.995	716.27	777.829	725.194	617.712	427.47	1144.43	1015.19	1503.01	1053.01	846.398	797.509	873.654	692.721	972.525	756.569
ENSG00000137996	359.177	-0.406902	0.000453437	1	100266207	100292769	RNA 3'-terminal phosphate cyclase [Source:HGNC Symbol;Acc:HGNC:17981]	RTCA	protein_coding	335.351	297.419	550.502	350.495	518.677	377.05	269.04	335.719	387.627	258.412	369.282	247.965	507.942	319.832	323.958	353.055	359.607	283.165	389.673	257.855	517.061	357.178	387.59	277.394	340.46	288.284	523.382	272.989
ENSG00000162976	207.103	0.602491	0.000454792	2	11155198	11178874	PQ loop repeat containing 3 [Source:HGNC Symbol;Acc:HGNC:28503]	PQLC3	protein_coding	183.509	280.856	159.415	204.006	126.524	293.261	222.392	184.815	341.08	288.939	135.859	155.518	117.666	304.51	114.29	229.009	116.002	211.012	77.5564	250.642	118.828	256.304	171.197	326.779	255.056	300.879	176.317	196.663
ENSG00000196876	38.0202	-0.91085	0.000456545	12	51590266	51812864	sodium voltage-gated channel alpha subunit 8 [Source:HGNC Symbol;Acc:HGNC:10596]	SCN8A	protein_coding	71.4549	30.246	44.6957	46.7327	14.6795	18.4619	48.8177	21.1944	97.1074	9.229	71.121	84.6708	53.5903	12.4485	29.6003	22.6623	36.2507	13.6137	66.2067	23.4413	93.1353	17.4986	41.0873	22.0655	12.6951	8.39662	36.1913	17.2707
ENSG00000140932	1802.83	0.767701	0.000457107	16	66579448	66588275	CKLF like MARVEL transmembrane domain containing 2 [Source:HGNC Symbol;Acc:HGNC:19173]	CMTM2	protein_coding	1837.53	2763.91	672.67	1988.83	410.328	1261.09	1626.17	2155.05	812.171	1174.21	498.759	2139.23	528.913	2757.83	1328.72	1940.61	1113.62	903.949	2215.09	2870.66	498.863	2495.1	2500.85	3149.06	2398.22	3029.78	2830.34	2577.79
ENSG00000133687	958.957	-0.629265	0.000457107	12	29500840	29784759	transmembrane and tetratricopeptide repeat containing 1 [Source:HGNC Symbol;Acc:HGNC:24099]	TMTC1	protein_coding	345.907	167.073	17.8783	23.3663	87.3782	61.7765	335.215	154.295	762.414	279	1231.85	2313.76	1889.64	1438.29	178.424	103.77	4583.54	1817.43	947.701	663.57	1960.12	1654.14	1401.08	819.574	1066.39	600.359	1405.89	540.964
ENSG00000102804	666.187	-0.680191	0.000460266	13	44432143	44577147	TSC22 domain family member 1 [Source:HGNC Symbol;Acc:HGNC:16826]	TSC22D1	protein_coding	1162.77	1145.75	481.223	544.615	1221.9	221.543	835.325	434.061	92.2922	99.3892	583.557	296.348	1110.25	781.385	1153.59	475.909	804.766	558.162	860.687	320.966	1389.54	603.188	853.246	522.216	481.26	582.166	661.651	375.499
ENSG00000137880	45.8892	0.834702	0.000463063	15	40764020	40767710	GTP cyclohydrolase I feedback regulator [Source:HGNC Symbol;Acc:HGNC:4194]	GCHFR	protein_coding	17.8637	43.9287	18.6232	59.3145	22.3688	77.3981	49.9025	47.4754	101.12	61.0534	31.0015	67.3911	15.1451	56.4972	19.7335	54.8667	15.9503	43.5638	30.2659	66.7176	16.0578	87.4932	30.1307	44.1309	41.5476	43.3826	58.4629	63.5117
ENSG00000188487	20.1425	-0.958151	0.000463063	11	15112424	15247208	inscuteable homolog (Drosophila) [Source:HGNC Symbol;Acc:HGNC:33116]	INSC	protein_coding	22.7357	18.0036	37.2464	16.1767	19.5727	2.8403	8.6787	15.26	13.6432	3.54961	16.4125	7.77589	68.7353	20.1092	27.1336	8.34928	73.9515	12.2523	7.56647	7.21272	29.9746	6.17599	26.0219	35.725	20.7738	11.1955	18.5596	8.3568
ENSG00000126804	482.711	0.457719	0.000463903	14	64503712	64533690	zinc finger and BTB domain containing 1 [Source:HGNC Symbol;Acc:HGNC:20259]	ZBTB1	protein_coding	423.858	598.439	369.484	591.348	224.387	543.917	390.542	390.825	441.397	494.816	423.991	621.207	273.776	666.476	473.604	708.496	474.16	481.925	435.072	530.135	382.176	502.314	397.177	566.347	446.637	600.359	532.662	530.378
ENSG00000115607	8105.92	-0.533645	0.000463903	2	102418689	102452565	interleukin 18 receptor accessory protein [Source:HGNC Symbol;Acc:HGNC:5989]	IL18RAP	protein_coding	12010.9	6183.15	8802.81	6555.16	11800.3	6804.64	2042.75	2027.88	2914.03	985.373	10285.2	4878.08	12740.5	12056.9	14685	12675.4	10863.6	9377.11	8799.81	10581.1	8976.32	7658.23	11438.7	5006.76	5274.24	3402.03	11641.5	6498.25
ENSG00000136250	2354.11	0.630191	0.000464078	7	36512949	36724549	acyloxyacyl hydrolase [Source:HGNC Symbol;Acc:HGNC:548]	AOAH	protein_coding	2831.4	3206.8	822.4	3510.34	1191.84	3249.3	1659.8	1669.27	2503.12	3291.2	1320.3	2306.85	1705.57	3897.35	2033.37	2811.32	877.268	1644.53	1265.49	1693.19	841.429	2541.42	2191.32	2469.23	2986.81	3102.55	4172.21	4119.35
ENSG00000215271	84.878	-0.532065	0.000467572	14	23272422	23299447	homeobox and leucine zipper encoding [Source:HGNC Symbol;Acc:HGNC:20164]	HOMEZ	protein_coding	103.122	89.2977	169.099	87.1744	94.3685	68.8772	54.2419	75.452	143.655	83.7709	125.83	88.1268	97.8605	40.2184	74.0006	54.8667	117.452	66.7071	49.1821	39.6699	137.027	82.3465	79.4354	33.6236	100.407	81.1674	76.0945	63.5117
ENSG00000162702	1731.02	-0.398732	0.000474061	1	200404940	200410056	zinc finger protein 281 [Source:HGNC Symbol;Acc:HGNC:13075]	ZNF281	protein_coding	1837.53	1413.64	1664.91	1392.99	2327.06	1578.5	816.883	1139.41	1382.78	763.167	1664.96	1512.84	2865.91	2385.33	2993.74	1900.06	2789.86	1749.36	2822.3	2006.94	1651.81	1178.58	2025.6	1115.88	1567.27	1237.1	1437.44	1246.83
ENSG00000120868	4138.6	-0.393822	0.000479584	12	98645141	98735433	apoptotic peptidase activating factor 1 [Source:HGNC Symbol;Acc:HGNC:576]	APAF1	protein_coding	5420.02	3733.94	5458.08	5319.44	6132.55	3943.75	2103.5	2570.46	3162.81	2657.24	4383.97	4478.05	6435.49	3800.63	4315.88	3894.34	5739.22	3743.77	5113.05	3303.42	5200.59	3429.73	4281.29	2437.71	3660.81	3042.38	4960.99	3157.76
ENSG00000105612	402.328	0.573362	0.000487491	19	12875211	12881468	deoxyribonuclease 2, lysosomal [Source:HGNC Symbol;Acc:HGNC:2960]	DNASE2	protein_coding	284.196	351.43	251.786	587.753	224.387	458.708	404.644	499.34	723.089	712.053	175.979	385.339	256.301	271.953	198.98	281.49	139.203	345.788	245.91	324.572	118.828	430.261	516.33	585.26	477.798	632.546	670.931	710.328
ENSG00000126861	27.477	0.735303	0.000496928	17	31272013	31297539	oligodendrocyte myelin glycoprotein [Source:HGNC Symbol;Acc:HGNC:8135]	OMG	protein_coding	28.4196	49.6898	24.5826	29.6573	10.4854	30.5332	13.0181	9.32553	21.6686	24.8473	20.9716	41.4714	25.6301	63.2003	32.8892	54.8667	36.2507	66.7071	15.1329	16.2286	9.63469	17.4986	15.0653	30.4713	12.6951	16.7932	9.27982	42.3411
ENSG00000064225	413.651	0.656243	0.000500061	3	98732236	98821201	ST3 beta-galactoside alpha-2,3-sialyltransferase 6 [Source:HGNC Symbol;Acc:HGNC:18080]	ST3GAL6	protein_coding	526.98	446.488	306.91	495.187	150.291	491.372	233.24	268.745	310.583	343.603	148.625	359.419	185.236	756.488	262.291	584.449	198.654	569.053	359.408	569.805	310.451	480.698	603.983	668.268	431.633	513.593	502.038	504.751
ENSG00000137331	228.556	-0.583776	0.000500061	6	30743199	30744554	immediate early response 3 [Source:HGNC Symbol;Acc:HGNC:5392]	IER3	protein_coding	87.6947	93.6186	113.229	46.7327	113.242	75.978	225.646	123.775	140.445	112.168	413.961	195.261	551.048	234.607	416.048	274.333	205.904	49.0093	376.432	277.69	389.67	309.829	204.067	177.574	275.83	249.1	328.506	338.172
ENSG00000137225	11.8606	-1.03907	0.000504551	6	44158811	44184402	calpain 11 [Source:HGNC Symbol;Acc:HGNC:1478]	CAPN11	protein_coding	7.30789	2.88057	14.8986	1.79741	23.7669	2.8403	24.9513	10.1733	1.60508	0.709923	24.6188	1.72798	41.9402	25.8547	33.7114	9.54203	5.80012	2.72274	13.2413	3.60636	12.8462	7.20532	9.58703	9.45662	10.3869	9.79606	10.2078	8.91392
ENSG00000166471	419.737	-0.442009	0.000506994	11	9280654	9314780	transmembrane protein 41B [Source:HGNC Symbol;Acc:HGNC:28948]	TMEM41B	protein_coding	604.119	389.597	741.203	443.062	550.133	367.109	201.78	326.394	320.214	203.038	341.928	271.292	489.302	372.499	614.205	388.838	606.112	347.149	563.702	448.992	548.107	379.823	542.352	489.643	273.522	228.108	454.711	245.69
ENSG00000225528	142.906	-0.661585	0.00050852	22	39960397	39964718		RP3-370M22.8	transcribed_processed_pseudogene	157.526	141.148	110.249	107.845	169.863	52.5455	221.307	79.6909	20.8661	20.5878	66.562	21.5997	154.946	121.613	335.47	112.119	237.805	157.919	166.462	55.8985	215.175	139.989	275.285	187.031	167.345	167.932	168.893	167.693
ENSG00000006125	2449.15	-0.609725	0.000509963	17	35578046	35726409	adaptor related protein complex 2 beta 1 subunit [Source:HGNC Symbol;Acc:HGNC:563]	AP2B1	protein_coding	2458.7	1300.58	2169.23	1820.78	5039.28	2029.39	3422.66	6201.48	1805.72	1407.07	2573.12	2197.99	3406.48	897.252	2122.17	1425.34	2375.15	1285.13	5831.86	3038.36	2713.77	1372.1	2752.85	1655.96	1912.34	1749.3	2285.62	1326.5
ENSG00000127947	1690.67	-0.405002	0.000510137	7	77537275	77640071	protein tyrosine phosphatase, non-receptor type 12 [Source:HGNC Symbol;Acc:HGNC:9645]	PTPN12	protein_coding	1931.72	1573.51	2172.21	1619.47	2050.94	1220.62	1893.04	1182.65	868.349	974.724	2078.01	2367.33	3602.2	1759.07	2671.42	1866.66	2019.89	1536.99	1390.34	897.983	1780.28	1152.85	1780.45	1293.46	1439.16	1473.61	1552.51	1189.45
ENSG00000172638	45.6371	0.604646	0.00051211	11	65866441	65873592	EGF containing fibulin like extracellular matrix protein 2 [Source:HGNC Symbol;Acc:HGNC:3219]	EFEMP2	protein_coding	64.147	90.0178	9.68406	23.3663	31.4562	48.9951	22.7816	22.8899	24.0762	22.7175	51.0613	71.711	43.1052	76.6064	23.8447	59.6377	34.8007	63.9844	28.3743	77.5367	16.0578	40.1439	42.4568	49.3846	32.3148	47.5809	76.0945	83.0109
ENSG00000241170	40.7246	0.706621	0.000513306	11	74876286	74920022		RP11-147I3.1	transcribed_processed_pseudogene	56.8392	54.7308	14.8986	21.5689	29.3591	48.2851	33.63	30.5199	17.6559	51.8244	31.0015	51.8393	18.6401	54.5821	25.4891	57.2522	46.4009	98.0186	15.1329	43.2763	26.763	74.1119	42.4568	34.6743	32.3148	33.5865	29.6954	65.7402
ENSG00000172578	1080.22	-0.525213	0.000515018	3	183487531	183555689	kelch like family member 6 [Source:HGNC Symbol;Acc:HGNC:18653]	KLHL6	protein_coding	873.699	748.948	1422.07	1353.45	1448.38	993.394	913.433	550.206	982.31	939.228	1216.35	1208.72	1497.03	835.967	975.164	583.257	2537.55	709.274	1134.97	531.938	1794.19	954.19	987.464	925.698	1101.01	884.444	1187.82	956.018
ENSG00000007944	1049.36	0.760908	0.000517157	6	16129125	16148248	myosin regulatory light chain interacting protein [Source:HGNC Symbol;Acc:HGNC:21155]	MYLIP	protein_coding	775.448	1789.55	649.577	2066.12	445.279	950.79	394.881	1185.19	546.53	673.007	618.206	571.96	234.166	1601.07	1085.34	1861.89	658.313	2453.19	1046.07	1574.18	513.85	944.926	1401.08	1196.79	1212.96	1017.39	968.813	945.433
ENSG00000186074	1021.74	-0.483946	0.000527991	17	74694311	74712978	CD300 molecule like family member f [Source:HGNC Symbol;Acc:HGNC:29883]	CD300LF	protein_coding	997.121	388.157	1423.56	938.248	603.958	843.569	672.599	544.272	833.84	823.511	2054.3	1877.45	1624.02	1069.62	1228.41	801.531	761.265	445.168	1008.23	636.522	1747.09	859.492	1038.14	718.703	1251.04	1094.36	1450.44	874.121
ENSG00000163235	1012.29	-0.462445	0.000532199	2	70447280	70554193	transforming growth factor alpha [Source:HGNC Symbol;Acc:HGNC:11765]	TGFA	protein_coding	1356.02	910.26	1615.75	953.526	1891.56	1080.73	424.172	512.904	618.759	357.091	1286.56	1426.44	855.114	812.028	1358.32	1334.69	1519.63	1052.34	972.292	614.884	1149.74	855.374	1288.77	524.317	1038.69	684.325	1107.08	742.641
ENSG00000255240	36.8138	-0.712799	0.000532199	11	58933643	59058659		RP11-142C4.6	antisense	71.4549	54.0107	23.8377	22.4676	25.1649	9.23097	34.7148	16.9555	9.63049	7.09923	20.0598	2.59196	32.6202	9.5758	69.8895	33.3971	79.7516	38.1184	22.6994	9.01589	96.3469	65.8772	61.6309	57.7905	57.705	39.1842	31.5514	28.4131
ENSG00000244482	1554.43	-0.544601	0.000535871	19	54236592	54242791	leukocyte immunoglobulin like receptor A6 [Source:HGNC Symbol;Acc:HGNC:15495]	LILRA6	protein_coding	1533.85	844.727	2110.38	1506.23	1059.02	721.436	663.921	832.516	881.19	644.61	2624.18	4181.7	3392.5	1328.16	2707.6	1834.46	1529.78	735.14	2188.6	1273.04	1683.93	1302.1	1181.94	515.911	1758.85	996.399	2068.47	1423.44
ENSG00000176105	116.399	-0.72805	0.000541091	18	721588	812546	YES proto-oncogene 1, Src family tyrosine kinase [Source:HGNC Symbol;Acc:HGNC:12841]	YES1	protein_coding	77.9508	56.1711	218.264	63.8081	228.581	91.5996	81.3628	137.34	22.4711	33.3664	197.862	127.006	234.166	61.2851	131.557	71.5652	172.553	61.2616	179.704	75.7335	252.643	101.904	126.001	99.8199	91.1739	81.1674	107.646	75.2112
ENSG00000026297	2094.6	0.541014	0.000547506	6	166929504	166957191	ribonuclease T2 [Source:HGNC Symbol;Acc:HGNC:21686]	RNASET2	protein_coding	1965.82	2316.7	1902.55	3384.52	617.939	2339.7	1252.99	1620.95	1764.79	2446.39	1836.38	3689.23	1154.52	2699.42	1418.35	1708.02	1177.42	1573.74	1501.95	1864.49	1131.54	1987.64	2133.8	2437.71	2773.3	3427.22	3552.31	2969.45
ENSG00000183023	2022.12	0.736883	0.000552903	2	40097270	40611053	solute carrier family 8 member A1 [Source:HGNC Symbol;Acc:HGNC:11068]	SLC8A1	protein_coding	2605.67	2846.72	2083.56	2487.62	1138.71	2953.91	969.845	1060.57	1690.15	1716.59	1891.09	2872.76	820.164	4982.29	2112.31	4730.46	1122.32	3839.06	688.549	1859.08	422.856	1611.93	1985.88	1885.02	1365.3	1413.43	1540.45	1923.18
ENSG00000137672	44.3982	-0.82503	0.000556017	11	101451564	101872562	transient receptor potential cation channel subfamily C member 6 [Source:HGNC Symbol;Acc:HGNC:12338]	TRPC6	protein_coding	20.2997	23.7647	24.5826	14.3793	69.2035	7.81082	70.5144	20.3466	15.2483	9.229	23.707	12.0958	76.8904	29.685	100.312	27.4333	53.6511	23.1433	51.0737	19.835	124.18	76.1705	69.8484	70.3993	46.164	54.5781	61.2468	47.3552
ENSG00000104518	769.651	-0.447358	0.000556559	8	143553207	143563062	gasdermin D [Source:HGNC Symbol;Acc:HGNC:25697]	GSDMD	protein_coding	668.266	451.529	772.49	547.311	1119.84	663.21	834.24	565.466	862.731	695.724	946.457	629.847	888.899	699.991	601.872	394.802	967.169	336.258	535.328	571.608	1266.43	926.398	462.917	548.484	1216.42	1108.35	1326.09	942.09
ENSG00000145817	568.068	-0.421928	0.000567363	5	144158159	144170714	Yip1 domain family member 5 [Source:HGNC Symbol;Acc:HGNC:24877]	YIPF5	protein_coding	541.596	366.553	838.044	532.033	631.22	501.313	363.421	461.19	547.333	306.687	485.082	343.003	825.989	481.663	448.937	475.909	794.616	416.579	622.343	636.522	1033.05	753.471	723.136	553.738	553.968	436.624	765.585	466.309
ENSG00000172530	431.023	0.415513	0.000568034	16	87949244	88077318	BTG3 associated nuclear protein [Source:HGNC Symbol;Acc:HGNC:13450]	BANP	protein_coding	353.215	357.191	325.533	551.805	392.852	558.119	308.094	345.892	282.494	504.045	330.075	482.105	259.796	566.887	302.58	373.332	343.657	441.084	404.806	486.858	311.522	495.108	486.199	629.391	577.05	730.506	475.127	393.327
ENSG00000248774	42.6006	0.597457	0.000571316	4	173322206	173329694		RP11-798M19.3	antisense	82.8228	75.615	17.8783	37.7456	28.6601	41.1843	24.9513	22.0422	21.6686	25.5572	30.0897	51.8393	43.1052	95.758	32.0669	57.2522	33.3507	66.7071	56.7486	113.6	23.5515	44.2613	23.2828	31.5221	10.3869	15.3938	33.4073	52.3693
ENSG00000172967	12.569	1.08298	0.000573982	22	16783412	16821699	XK related 3 [Source:HGNC Symbol;Acc:HGNC:28778]	XKR3	protein_coding	9.74386	33.8467	1.48986	13.4806	20.9708	34.7937	3.25451	5.93443	4.0127	2.83969	0	13.8238	4.66002	52.6669	1.64446	3.57826	15.9503	17.6978	22.6994	27.0477	8.56417	26.7626	2.73915	8.40589	0	1.39944	2.78395	11.1424
ENSG00000266709	18.4772	-0.95666	0.000577113	17	14303854	14305505		RP11-214O1.2	lincRNA	28.4196	12.2424	32.7768	8.08835	18.1747	7.81082	18.4422	2.54333	8.82795	10.6488	79.3273	12.9598	44.2702	18.194	64.1339	13.1203	13.0503	21.7819	15.1329	10.8191	9.63469	8.23465	9.58703	5.25368	4.6164	1.39944	22.2716	15.5994
ENSG00000173275	90.1405	-0.506812	0.000579074	X	135344796	135363152	zinc finger protein 449 [Source:HGNC Symbol;Acc:HGNC:21039]	ZNF449	protein_coding	86.8827	59.0517	132.597	80.8835	118.834	51.8354	59.6661	39.8455	147.668	93.7098	141.33	117.502	161.936	81.3943	101.134	76.3363	116.002	51.732	66.2067	50.489	108.123	86.4638	65.7396	90.3633	91.1739	79.7679	93.7262	73.5398
ENSG00000156127	343.115	-0.580341	0.00058389	14	75522425	75547015	basic leucine zipper ATF-like transcription factor [Source:HGNC Symbol;Acc:HGNC:958]	BATF	protein_coding	223.297	226.125	531.878	452.947	341.824	342.966	563.031	168.707	386.825	144.114	553.468	366.331	549.883	342.814	279.558	189.648	378.458	164.726	346.166	232.61	523.485	321.151	178.045	252.177	475.489	249.1	485.334	337.058
ENSG00000263874	16.66	0.990789	0.000585828	17	38925168	38929384	long intergenic non-protein coding RNA 672 [Source:HGNC Symbol;Acc:HGNC:44353]	LINC00672	protein_coding	21.1117	19.4439	5.21449	27.8599	2.09708	19.172	9.76354	13.5644	11.2356	29.1068	7.29446	23.3277	5.82503	55.5396	9.04452	17.8913	4.35009	34.0342	15.1329	12.6223	5.3526	10.2933	13.6958	17.8625	20.7738	19.5921	10.2078	25.0704
ENSG00000112299	9679.54	-0.578203	0.000588369	6	132681590	132714049	vanin 1 [Source:HGNC Symbol;Acc:HGNC:12705]	VNN1	protein_coding	15720.9	12109.2	6917.4	8080.26	12467.8	7966.33	2748.98	2300.02	6645.04	1567.51	7433.97	6959.42	21078.4	8049.42	12322.8	8263.4	10625.8	6066.26	19160.2	19737.6	9877.69	7898.06	12033.1	6519.82	4794.13	3344.66	20463.9	9874.95
ENSG00000104870	1869.86	0.491583	0.000593123	19	49506816	49526333	Fc fragment of IgG receptor and transporter [Source:HGNC Symbol;Acc:HGNC:3621]	FCGRT	protein_coding	1805.86	2483.05	1711.84	3359.36	1682.55	2690.47	965.506	2320.36	1075.4	1616.49	1491.72	2869.3	1428.3	1896.01	1523.59	1754.54	1332.58	2656.03	1291.98	1716.63	943.129	1586.2	2084.49	1726.36	2274.73	2423.83	2023.93	1621.78
ENSG00000142507	474.716	-0.417284	0.000601847	17	4796144	4798503	proteasome subunit beta 6 [Source:HGNC Symbol;Acc:HGNC:9543]	PSMB6	protein_coding	416.55	309.661	784.409	447.555	669.667	593.622	568.455	657.026	614.746	338.633	551.644	466.553	549.883	275.783	356.848	356.633	340.757	232.794	529.653	456.204	639.101	430.261	339.655	327.83	582.821	377.848	666.291	411.155
ENSG00000161057	519.721	-0.421635	0.000601847	7	103344254	103369395	proteasome 26S subunit, ATPase 2 [Source:HGNC Symbol;Acc:HGNC:9548]	PSMC2	protein_coding	578.135	367.993	958.722	469.124	604.657	642.617	624.866	458.647	686.975	351.412	569.88	349.915	544.058	341.856	476.893	388.838	472.71	328.09	425.614	479.646	784.692	593.924	446.482	438.157	575.896	537.384	614.324	440.682
ENSG00000270277	121.805	-0.576106	0.000603285	2	178548884	178550681		RP11-65L3.2	antisense	154.278	64.0927	110.249	59.3145	144.698	72.4276	95.4657	66.9743	69.0185	92.9999	240.717	112.318	217.856	179.067	239.269	161.022	279.856	114.355	102.147	77.5367	117.757	58.6719	113.675	76.7037	57.705	44.782	127.134	160.451
ENSG00000174837	2181.52	-0.765276	0.000603285	19	6887566	6940459	adhesion G protein-coupled receptor E1 [Source:HGNC Symbol;Acc:HGNC:3336]	ADGRE1	protein_coding	2889.05	1019	1495.81	2308.77	1379.18	1951.28	1648.95	991.898	1498.34	756.778	5722.51	6821.18	3472.88	1374.13	1702.84	755.013	3345.22	453.336	2186.71	1009.78	3568.05	2763.76	2054.36	1255.63	3626.18	1294.48	2785.8	951.561
ENSG00000206344	295.196	0.670542	0.000608069	6	31197760	31203968	HLA complex group 27 (non-protein coding) [Source:HGNC Symbol;Acc:HGNC:27366]	HCG27	protein_coding	431.166	311.102	194.426	318.142	255.144	205.922	150.792	225.508	92.2922	361.351	297.249	308.444	146.791	560.184	161.979	338.742	272.605	684.769	183.487	331.785	119.898	209.984	280.763	320.474	330.073	467.412	220.86	484.137
ENSG00000106638	191.898	-0.440666	0.000615891	7	73568932	73578791	transducin beta like 2 [Source:HGNC Symbol;Acc:HGNC:11586]	TBL2	protein_coding	159.15	148.349	315.849	159.071	384.464	181.779	219.137	210.248	256.011	137.015	285.396	228.957	244.651	152.255	168.557	144.323	136.303	125.246	157.004	119.01	207.681	181.162	113.675	114.53	220.433	149.74	270.971	182.178
ENSG00000186088	647.826	-0.381588	0.000617149	7	77310751	77416400	gamma-secretase activating protein [Source:HGNC Symbol;Acc:HGNC:28042]	GSAP	protein_coding	747.029	440.727	518.47	425.088	659.181	565.219	551.098	292.483	518.441	527.473	997.518	512.345	865.599	808.197	704.651	526.005	662.663	453.336	508.845	463.417	1039.48	892.43	695.744	592.615	1122.94	729.107	681.139	637.902
ENSG00000156531	302.85	-0.35652	0.000624444	X	134373253	134428791	PHD finger protein 6 [Source:HGNC Symbol;Acc:HGNC:18145]	PHF6	protein_coding	317.487	253.49	385.128	235.461	427.105	350.777	249.513	244.159	377.997	228.595	311.838	229.821	351.832	220.243	320.669	317.273	400.208	254.576	247.802	279.493	467.818	330.415	364.307	302.612	220.433	183.326	335.001	272.432
ENSG00000101608	11265.8	-0.389266	0.000643919	18	3247481	3256236	myosin light chain 12A [Source:HGNC Symbol;Acc:HGNC:16701]	MYL12A	protein_coding	17153.2	11528	16253.6	13475.2	13898.7	11561.4	5721.43	6179.44	5596.12	3461.58	11691.2	9096.06	13664.4	9142.02	11483.3	11866.7	13276.5	10633.7	14641.1	13902.5	15311.7	12708.1	15447.4	9484.99	8663.83	6332.45	16218.3	7049.24
ENSG00000132122	62.2372	0.925242	0.000645598	1	48295372	48472208	spermatogenesis associated 6 [Source:HGNC Symbol;Acc:HGNC:18309]	SPATA6	protein_coding	70.643	88.5776	33.5217	72.7951	11.1844	106.511	31.4603	18.6511	35.3118	61.0534	77.5037	183.165	19.8051	198.219	28.778	134.781	13.0503	42.2025	17.0246	46.8827	11.7757	38.0853	93.1311	77.7545	46.164	50.3797	61.2468	72.9827
ENSG00000100416	83.3553	0.484105	0.000645598	22	46330875	46357340	tRNA 5-methylaminomethyl-2-thiouridylate methyltransferase [Source:HGNC Symbol;Acc:HGNC:25481]	TRMU	protein_coding	66.583	100.1	59.5942	77.2886	57.3201	91.5996	86.787	77.1476	71.4261	126.366	81.1509	66.5271	79.2204	116.825	51.8004	87.071	53.6511	111.632	43.5072	79.3399	71.7249	94.6985	86.2833	105.074	77.3247	100.759	76.0945	137.052
ENSG00000049860	1167.01	0.465032	0.000645598	5	74640023	74722647	hexosaminidase subunit beta [Source:HGNC Symbol;Acc:HGNC:4879]	HEXB	protein_coding	891.563	1366.83	680.864	1233.02	917.821	1778.03	1206.34	926.619	1324.99	1165.69	728.535	1092.08	660.558	1392.32	1217.72	1696.1	865.667	1106.79	762.322	1361.4	858.558	1496.65	1090.18	1601.32	1149.48	1314.07	1381.76	1408.96
ENSG00000017260	828.422	-0.325863	0.000645598	3	130850595	131016712	ATPase secretory pathway Ca2+ transporting 1 [Source:HGNC Symbol;Acc:HGNC:13211]	ATP2C1	protein_coding	927.29	771.993	753.122	653.359	940.19	576.581	955.742	566.314	506.403	530.312	839.775	650.583	972.78	872.355	1046.7	738.315	875.818	567.691	1063.09	755.532	1245.02	1005.66	1080.6	921.495	904.815	873.249	816.624	784.425
ENSG00000142892	446.318	-0.466678	0.000645598	1	77088990	77219430	phosphatidylinositol glycan anchor biosynthesis class K [Source:HGNC Symbol;Acc:HGNC:8965]	PIGK	protein_coding	639.035	312.542	397.046	356.786	453.668	424.625	323.282	279.766	564.186	289.649	404.843	288.572	511.437	422.293	495.804	496.186	849.717	324.006	533.436	429.157	857.487	427.173	582.07	509.607	345.076	275.689	393.464	310.316
ENSG00000120705	1726.97	-0.344566	0.000652106	5	138506095	138543300	eukaryotic translation termination factor 1 [Source:HGNC Symbol;Acc:HGNC:3477]	ETF1	protein_coding	2016.17	1616.72	2062.7	1809.99	2481.54	1751.75	1454.77	1737.09	1465.44	819.251	1685.02	1480.88	2095.85	1422.96	2469.98	1916.76	1774.84	1285.13	1827.3	1713.02	1872.34	1624.29	1807.84	1352.3	1388.38	1171.33	2689.29	1562.16
ENSG00000185619	473.893	-0.471408	0.000652106	4	705748	770640	polycomb group ring finger 3 [Source:HGNC Symbol;Acc:HGNC:10066]	PCGF3	protein_coding	676.386	486.096	437.273	283.991	715.103	398.352	274.464	233.986	260.826	300.297	505.142	335.227	1675.28	720.1	917.608	562.98	939.619	415.218	206.186	221.791	447.478	317.034	273.915	202.792	320.84	278.488	424.088	438.453
ENSG00000248593	29.7634	-0.830575	0.000652662	12	6884682	6885786	destrin, actin depolymerizing factor pseudogene 2 [Source:HGNC Symbol;Acc:HGNC:34546]	DSTNP2	transcribed_unprocessed_pseudogene	24.3596	25.9251	75.9826	43.1378	53.126	29.8231	16.2726	14.4122	51.3626	19.8778	30.0897	26.7836	47.7652	10.5334	46.8671	15.5058	75.4015	5.44548	13.2413	9.01589	42.8208	28.8213	15.0653	11.5581	27.6984	16.7932	36.1913	19.4992
ENSG00000128266	229.066	-0.691295	0.00065448	22	23070361	23125037	G protein subunit alpha z [Source:HGNC Symbol;Acc:HGNC:4395]	GNAZ	protein_coding	250.092	361.512	86.4116	91.6679	340.426	67.4571	384.033	149.209	38.522	29.1068	175.067	73.439	329.697	134.061	270.513	118.083	413.258	289.972	206.186	82.9462	463.535	217.189	468.395	322.576	296.604	285.485	236.635	231.762
ENSG00000254481	13.6033	-0.978341	0.000673515	11	134123828	134124329	protein tyrosine phosphatase type IVA, member 2 pseudogene 2 [Source:HGNC Symbol;Acc:HGNC:9638]	PTP4A2P2	processed_pseudogene	22.7357	7.20143	11.9188	9.88576	23.0678	4.26045	24.9513	5.08665	4.0127	0.709923	9.11808	3.45595	22.1351	5.74548	18.089	4.77102	23.2005	12.2523	17.0246	3.60636	31.0451	9.26398	39.7177	21.0147	9.2328	13.9944	8.35184	15.0422
ENSG00000213085	39.8308	0.915052	0.000674563	1	159872364	159900163	cilia and flagella associated protein 45 [Source:HGNC Symbol;Acc:HGNC:17229]	CFAP45	protein_coding	16.2398	46.0891	48.4203	41.3404	12.5825	53.2556	35.7996	44.0843	8.02541	58.9236	5.47085	44.0634	8.15504	67.9882	42.7559	119.275	33.3507	57.1775	30.2659	46.8827	10.7052	10.2933	28.7611	45.1816	51.9345	92.3629	32.4794	23.399
ENSG00000112576	3216.66	-0.3658	0.000683449	6	41934933	42050357	cyclin D3 [Source:HGNC Symbol;Acc:HGNC:1585]	CCND3	protein_coding	2617.04	2431.92	4320.58	2690.72	2988.33	2234.6	2176.18	2046.53	2774.38	1511.43	4868.14	3906.95	6164.04	3303.65	3532.3	3589	2447.65	2220.39	3302.77	3040.16	4848.39	3891.9	3043.2	1840.89	3061.83	2832.46	4847.78	3533.26
ENSG00000078177	317.811	-0.431099	0.000688432	4	40056826	40158252	NEDD4 binding protein 2 [Source:HGNC Symbol;Acc:HGNC:29851]	N4BP2	protein_coding	259.836	181.476	732.264	308.256	304.775	277.639	354.742	297.569	272.864	244.213	397.548	241.053	265.621	218.328	358.492	353.055	453.859	238.24	461.555	396.699	366.118	238.805	284.872	276.344	238.899	204.318	427.8	243.461
ENSG00000105373	602.27	0.424969	0.000693214	19	47745522	47757058	glioma tumor suppressor candidate region gene 2 [Source:HGNC Symbol;Acc:HGNC:4333]	GLTSCR2	protein_coding	284.196	812.321	421.629	646.169	457.862	700.844	1111.96	1075.83	902.858	988.213	611.823	697.238	468.332	523.796	369.181	551.052	603.212	736.501	408.59	501.284	218.386	339.679	423.199	634.645	570.126	773.889	474.199	556.563
ENSG00000120265	2457.85	-0.410926	0.000693214	6	149749443	149811420	protein-L-isoaspartate (D-aspartate) O-methyltransferase [Source:HGNC Symbol;Acc:HGNC:8728]	PCMT1	protein_coding	3378.68	1803.24	2983.44	2244.07	3048.45	2485.97	1507.92	1868.5	1861.89	904.442	1989.57	1714.15	2989.4	2093.27	2501.22	2181.55	3091.46	1637.73	3225.21	2861.65	4100.09	3343.27	3139.07	2313.72	2425.92	2244.7	3042.85	1838.5
ENSG00000001036	176.388	0.491673	0.000701257	6	143494811	143511690	fucosidase, alpha-L- 2, plasma [Source:HGNC Symbol;Acc:HGNC:4008]	FUCA2	protein_coding	118.55	190.838	172.078	174.349	148.892	294.681	183.338	200.923	277.679	249.183	127.653	158.11	130.481	194.389	97.8453	197.997	97.152	190.592	94.5809	165.892	129.533	211.013	84.9137	171.27	265.443	225.309	154.973	231.205
ENSG00000101846	199.4	0.557807	0.000705308	X	7219456	7354810	steroid sulfatase (microsomal), isozyme S [Source:HGNC Symbol;Acc:HGNC:11425]	STS	protein_coding	272.016	407.601	172.078	269.612	96.4655	206.632	108.484	154.295	83.4642	125.656	178.714	215.133	220.186	331.323	136.49	299.381	118.902	411.134	94.5809	185.727	162.719	239.834	199.958	148.154	122.335	135.745	254.267	232.319
ENSG00000167658	8261.82	0.35431	0.000705308	19	3976056	3985469	eukaryotic translation elongation factor 2 [Source:HGNC Symbol;Acc:HGNC:3214]	EEF2	protein_coding	7059.42	12456.3	6416.06	10495.1	7993.36	8231.18	10187.7	15672.8	10047.8	11067.7	5621.3	7359.45	6515.88	6404.29	4194.19	6382.43	5920.47	8200.89	10513.6	9198.02	3936.3	5590.3	8173.63	9105.68	8323.37	11853.2	6422.56	7987.99
ENSG00000227671	318.253	-0.316426	0.000705308	1	247189851	247210856		RP11-488L18.4	transcribed_unprocessed_pseudogene	393.814	300.3	397.046	289.383	400.542	280.479	202.865	174.642	309.781	312.366	513.348	349.051	448.527	318.874	389.737	300.574	506.06	348.511	270.501	263.264	404.657	278.949	294.459	278.445	201.968	170.731	254.267	257.947
ENSG00000112294	343.779	-0.619991	0.000706473	6	24494852	24537207	aldehyde dehydrogenase 5 family member A1 [Source:HGNC Symbol;Acc:HGNC:408]	ALDH5A1	protein_coding	256.588	68.4136	187.722	177.944	593.473	273.379	1187.9	1279.29	130.814	139.855	185.097	67.3911	339.017	146.51	385.626	298.189	223.304	115.716	911.76	468.827	165.931	72.0532	509.482	305.764	371.62	387.644	186.524	189.978
ENSG00000213719	10771.9	-0.332121	0.000712911	6	31730581	31739763	chloride intracellular channel 1 [Source:HGNC Symbol;Acc:HGNC:2062]	CLIC1	protein_coding	11325.6	7952.54	12549.8	10769.2	14983.6	12131.6	7810.83	6758.47	7730.88	5178.89	10012.6	7622.1	12999.1	11432.5	12895	9815.17	12655.9	7577.38	11472.7	11987.5	10216	10614.5	12209.8	10709.1	12637.4	10686.1	18785.1	10095
ENSG00000196139	50.9171	-0.788524	0.000712911	10	5035354	5107686	aldo-keto reductase family 1 member C3 [Source:HGNC Symbol;Acc:HGNC:386]	AKR1C3	protein_coding	70.643	12.9626	154.2	48.5301	53.126	58.2261	32.5451	22.0422	130.012	68.8625	43.7668	44.9274	12.8151	25.8547	62.4894	27.4333	60.9012	28.5888	39.724	34.2604	76.007	29.8506	72.5875	52.5368	76.1706	22.391	49.183	15.0422
ENSG00000180263	46.426	0.644279	0.000714789	12	95076749	95217482	FYVE, RhoGEF and PH domain containing 6 [Source:HGNC Symbol;Acc:HGNC:21740]	FGD6	protein_coding	25.1716	61.2121	43.9507	33.2521	23.0678	41.1843	45.5632	46.6277	44.1397	84.4808	32.8251	63.9351	17.4751	67.9882	49.3338	82.3	34.8007	81.6822	20.8078	37.8668	24.622	31.9093	35.609	48.3339	61.1673	60.1758	38.0473	62.3974
ENSG00000213462	240.55	0.544658	0.000715273	7	64990809	65006743	endogenous retrovirus group 3 member 1 [Source:HGNC Symbol;Acc:HGNC:3454]	ERV3-1	protein_coding	188.381	203.08	314.359	416.1	197.125	235.745	124.756	172.946	139.642	455.77	227.952	319.676	165.431	536.245	216.246	234.973	250.855	468.311	111.606	180.318	120.969	136.901	150.653	228.01	181.194	228.108	254.267	275.774
ENSG00000163293	9.10548	1.15678	0.000724967	4	47914142	48040173	NIPA like domain containing 1 [Source:HGNC Symbol;Acc:HGNC:27194]	NIPAL1	protein_coding	0.811988	2.88057	9.68406	34.1508	0.699026	3.55037	2.16968	6.78221	0.802541	4.25954	0.911808	6.9119	0	3.83032	4.11115	4.77102	5.80012	93.9345	7.56647	9.01589	3.21156	0	2.73915	4.20294	5.7705	36.3854	0	0
ENSG00000224032	51.7591	0.602156	0.000724967	5	112160526	112164276	EPB41L4A antisense RNA 1 [Source:HGNC Symbol;Acc:HGNC:30749]	EPB41L4A-AS1	lincRNA	26.7956	53.2906	27.5623	53.0236	38.4464	61.7765	77.0235	64.4309	90.6871	79.5114	44.6786	39.7434	34.9502	63.2003	37.0003	70.3725	40.6008	73.514	45.3988	77.5367	24.622	54.5546	32.8698	69.3486	24.2361	57.3769	34.3353	52.3693
ENSG00000058799	836.881	-0.318888	0.000724967	1	53851719	53889834	Yip1 domain family member 1 [Source:HGNC Symbol;Acc:HGNC:25231]	YIPF1	protein_coding	952.462	688.456	952.762	970.602	1071.61	840.018	468.65	490.862	723.892	452.931	949.192	780.181	1183.65	1008.33	1046.7	848.048	1286.18	849.495	792.588	717.665	893.885	730.825	743.68	694.536	884.041	673.129	1095.95	642.359
ENSG00000151023	59.602	-0.682408	0.000724967	10	24981979	25062279	enkurin, TRPC channel interacting protein [Source:HGNC Symbol;Acc:HGNC:28388]	ENKUR	protein_coding	141.286	70.574	32.7768	61.1119	117.436	41.1843	41.2238	21.1944	6.42033	7.80915	29.1779	11.2318	87.3754	55.5396	76.4673	34.5899	152.253	106.187	49.1821	18.0318	144.52	54.5546	89.0224	74.6023	49.6263	29.3882	37.1193	28.9702
ENSG00000178719	781.009	-0.461666	0.000731078	8	143990058	143993415	glutamate ionotropic receptor NMDA type subunit associated protein 1 [Source:HGNC Symbol;Acc:HGNC:4589]	GRINA	protein_coding	616.299	412.642	621.27	431.378	555.026	454.448	941.639	718.066	596.288	505.465	1741.55	2020	2193.71	694.245	1202.92	712.074	611.912	397.52	862.578	548.166	586.645	560.986	761.484	544.281	602.44	404.437	823.12	747.655
ENSG00000099991	150.501	0.70421	0.00073604	22	24011192	24178628	calcineurin binding protein 1 [Source:HGNC Symbol;Acc:HGNC:24187]	CABIN1	protein_coding	78.7628	119.544	99.0754	94.364	26.563	106.511	216.968	122.08	137.234	435.893	197.862	374.971	149.121	344.729	111.001	225.431	59.4512	102.103	79.448	81.1431	61.0197	103.962	117.784	139.748	141.954	204.318	58.4629	224.519
ENSG00000166333	872.486	-0.450942	0.00073604	11	6603708	6610874	integrin linked kinase [Source:HGNC Symbol;Acc:HGNC:6040]	ILK	protein_coding	787.628	916.742	1299.15	725.255	1255.45	555.278	1229.12	704.502	520.046	560.129	1249.18	1068.75	1830.22	863.737	1019.56	700.147	829.417	585.389	720.707	495.874	1133.68	829.641	802.571	582.108	803.254	780.886	837.968	743.198
ENSG00000167851	1667.14	0.374237	0.00074238	17	74466416	74484796	CD300a molecule [Source:HGNC Symbol;Acc:HGNC:19319]	CD300A	protein_coding	858.271	1251.61	1643.31	2419.31	1132.42	1805.01	1382.08	1480.22	1177.33	1558.28	1102.38	2013.96	1515.67	2349.9	1504.68	1136.69	1452.93	1677.21	1498.16	1770.72	1461.26	2113.22	1407.92	2125.64	2153.55	2703.71	1945.98	2038.5
ENSG00000105254	504.573	-0.477201	0.000742459	19	36114289	36125947	tubulin folding cofactor B [Source:HGNC Symbol;Acc:HGNC:1989]	TBCB	protein_coding	591.939	339.907	1177.73	610.221	480.231	592.912	389.457	434.909	626.784	329.404	882.63	523.577	615.123	316.959	499.915	361.404	379.908	366.208	391.565	436.369	609.126	358.207	471.134	374.062	596.67	366.653	632.884	372.156
ENSG00000086548	160.655	0.855116	0.000746748	19	41750977	41772208	carcinoembryonic antigen related cell adhesion molecule 6 [Source:HGNC Symbol;Acc:HGNC:1818]	CEACAM6	protein_coding	18.6757	52.5704	32.0319	21.5689	25.864	71.0075	712.738	555.293	161.311	545.931	43.7668	314.492	23.3001	71.8185	32.0669	84.6855	44.9509	42.2025	408.59	299.328	32.1156	42.2026	32.8698	95.617	75.0165	125.949	78.8785	453.496
ENSG00000159556	12.948	1.00226	0.00074817	15	76336724	76342476	ISL LIM homeobox 2 [Source:HGNC Symbol;Acc:HGNC:18524]	ISL2	protein_coding	13.8038	15.8431	5.21449	8.98705	1.39805	4.26045	10.8484	16.1077	17.6559	34.7862	0.911808	38.8795	2.33001	22.0243	13.1557	20.2768	1.45003	4.08411	1.89162	12.6223	7.49364	18.528	8.21745	17.8625	4.6164	13.9944	18.5596	26.7418
ENSG00000111275	564.121	0.844491	0.000750385	12	111766887	111817529	aldehyde dehydrogenase 2 family (mitochondrial) [Source:HGNC Symbol;Acc:HGNC:404]	ALDH2	protein_coding	172.141	444.328	89.3913	259.726	151.689	916.706	757.217	621.42	864.337	606.984	180.538	893.364	234.166	512.305	362.603	1205.87	258.105	319.922	418.048	1004.37	107.052	793.615	787.506	545.332	702.847	1048.18	680.211	857.408
ENSG00000231389	788.543	0.519514	0.000750889	6	33064569	33080775	major histocompatibility complex, class II, DP alpha 1 [Source:HGNC Symbol;Acc:HGNC:4938]	HLA-DPA1	protein_coding	345.907	427.765	293.501	685.712	837.433	1208.55	766.98	667.199	2102.66	2239.1	465.934	814.741	359.987	745.955	841.963	938.697	1029.52	786.872	151.329	371.455	330.791	692.74	486.199	872.111	937.129	1279.09	544.725	855.179
ENSG00000186448	238.438	-0.499436	0.000755245	3	44584888	44648471	zinc finger protein 197 [Source:HGNC Symbol;Acc:HGNC:12988]	ZNF197	protein_coding	226.545	148.349	268.174	252.536	135.611	137.754	156.217	97.4942	402.073	181.03	185.097	267.836	334.357	167.576	127.446	108.541	645.263	322.645	431.289	263.264	347.919	235.717	283.502	202.792	162.728	131.547	296.954	155.994
ENSG00000088451	134.123	-0.407086	0.00076233	13	94574051	94596257	TDP-glucose 4,6-dehydratase [Source:HGNC Symbol;Acc:HGNC:20324]	TGDS	protein_coding	212.741	122.424	125.893	90.7692	118.135	100.121	121.502	81.3865	138.84	101.519	152.272	96.7666	180.576	138.849	101.134	100.191	149.353	107.548	143.763	126.223	264.419	130.725	143.805	161.813	118.872	95.1617	184.668	145.965
ENSG00000206341	1121.37	0.378096	0.000766398	6	29887752	29890482	major histocompatibility complex, class I, H (pseudogene) [Source:HGNC Symbol;Acc:HGNC:4965]	HLA-H	unprocessed_pseudogene	1381.19	2160.43	587.003	1001.16	1131.72	1228.43	844.004	1158.06	641.23	855.457	141.33	194.397	980.935	1672.89	1379.7	1547	1751.64	2822.12	860.687	1009.78	1324.23	2041.16	1306.58	1525.67	290.833	335.865	697.842	527.036
[truncated: 856 more rows]
